# Supplementary material
Source: PubMed Central journal article supplement (PMC4233117)

## DATA AND ANALYSES

### Comparison 1

Any supplements containing iron versus same supplements without iron or no treatment/  
placebo (no iron or placebo)

| Outcome or subgroup title                                                                                        | No. of studies | No. of participants | Statistical method                   | Effect size           |
|------------------------------------------------------------------------------------------------------------------|----------------|---------------------|--------------------------------------|-----------------------|
| 1 Low birthweight (less than 2500 g) (ALL)                                                                       | 11             | 8480                | Risk Ratio (M-H, Random, 95% CI)     | 0.81 [0.68, 0.97]     |
| 2 Low birthweight (less than 2500 g):<br>SUBGROUP ANALYSIS by gestational age<br>at the start of supplementation | 11             | 8480                | Risk Ratio (M-H, Random, 95% CI)     | 0.81 [0.68, 0.97]     |
| 2.1 Early gestational age (supplementation<br>started before 20 weeks' gestation or prior to<br>pregnancy)       | 6              | 5379                | Risk Ratio (M-H, Random, 95% CI)     | 0.74 [0.55, 1.00]     |
| 2.2 Late gestational age (supplementation<br>started at 20 weeks of gestation or later)                          | 3              | 665                 | Risk Ratio (M-H, Random, 95% CI)     | 1.05 [0.50, 2.19]     |
| 2.3 Unspecified or mixed gestational age at<br>the start of supplementation                                      | 2              | 2436                | Risk Ratio (M-H, Random, 95% CI)     | 0.87 [0.61, 1.24]     |
| 3 Low birthweight (less than 2500 g):<br>SUBGROUP ANALYSIS by anaemia status<br>at the start of supplementation  | 11             | 8480                | Risk Ratio (M-H, Random, 95% CI)     | 0.81 [0.68, 0.97]     |
| 3.1 Anaemic at start of supplementation                                                                          | 0              | 0                   | Risk Ratio (M-H, Random, 95% CI)     | 0.0 [0.0, 0.0]        |
| 3.2 Non-anaemic at the start of<br>supplementation                                                               | 8              | 4710                | Risk Ratio (M-H, Random, 95% CI)     | 0.75 [0.49, 1.16]     |
| 3.3 Unspecified or mixed anaemia status                                                                          | 3              | 3770                | Risk Ratio (M-H, Random, 95% CI)     | 0.82 [0.72, 0.94]     |
| 4 Low birthweight (less than 2500 g):<br>SUBGROUP ANALYSIS by dose of iron                                       | 11             | 8480                | Risk Ratio (M-H, Random, 95% CI)     | 0.81 [0.68, 0.97]     |
| 4.1 Low daily dose of iron (30 mg or less of<br>elemental iron)                                                  | 4              | 1031                | Risk Ratio (M-H, Random, 95% CI)     | 0.57 [0.23, 1.41]     |
| 4.2 Medium daily dose of iron (more than<br>30 mg and less than 60 mg elemental iron)                            | 1              | 727                 | Risk Ratio (M-H, Random, 95% CI)     | 1.21 [0.57, 2.54]     |
| 4.3 Higher daily dose of iron (60 mg<br>elemental iron or more)                                                  | 6              | 6722                | Risk Ratio (M-H, Random, 95% CI)     | 0.83 [0.73, 0.94]     |
| 5 Low birthweight (less than 2500 g):<br>SUBGROUP ANALYSIS by malarial status<br>of setting                      | 11             | 8480                | Risk Ratio (M-H, Random, 95% CI)     | 0.81 [0.68, 0.97]     |
| 5.1 Malarial setting                                                                                             | 5              | 4645                | Risk Ratio (M-H, Random, 95% CI)     | 0.83 [0.73, 0.94]     |
| 5.2 Non-malarial setting                                                                                         | 6              | 3835                | Risk Ratio (M-H, Random, 95% CI)     | 0.70 [0.40, 1.24]     |
| 6 Birthweight (g) (ALL)                                                                                          | 14             | 9385                | Mean Difference (IV, Random, 95% CI) | 30.81 [5.94, 55.68]   |
| 7 Birthweight (g): SUBGROUP ANALYSIS<br>by gestational age at the start of<br>supplementation                    | 14             | 9385                | Mean Difference (IV, Random, 95% CI) | 30.81 [5.94, 55.68]   |
| 7.1 Early gestational age (supplementation<br>started before 20 weeks' gestation or prior to<br>pregnancy)       | 10             | 6378                | Mean Difference (IV, Random, 95% CI) | 38.63 [3.26, 73.99]   |
| 7.2 Late gestational age (supplementation<br>started at 20 weeks of gestation or later)                          | 3              | 681                 | Mean Difference (IV, Random, 95% CI) | -0.19 [-77.46, 77.08] |
| 7.3 Unspecified or mixed gestational age at<br>the start of supplementation                                      | 1              | 2326                | Mean Difference (IV, Random, 95% CI) | 20.20 [-15.13, 55.53] |
| 8 Birthweight (g): SUBGROUP ANALYSIS<br>by anaemia status at the start of<br>supplementation                     | 14             | 9385                | Mean Difference (IV, Random, 95% CI) | 30.81 [5.94, 55.68]   |

| Outcome or subgroup title                                                                                                  | No. of studies | No. of participants | Statistical method                   | Effect size            |
|----------------------------------------------------------------------------------------------------------------------------|----------------|---------------------|--------------------------------------|------------------------|
| 8.1 Anaemic at start of supplementation                                                                                    | 0              | 0                   | Mean Difference (IV, Random, 95% CI) | 0.0 [0.0, 0.0]         |
| 8.2 Non-anaemic at the start of supplementation                                                                            | 10             | 5426                | Mean Difference (IV, Random, 95% CI) | 31.13 [-8.90, 71.15]   |
| 8.3 Unspecified or mixed anaemia status                                                                                    | 4              | 3959                | Mean Difference (IV, Random, 95% CI) | 33.02 [3.65, 62.38]    |
| 9 Birthweight (g): SUBGROUP ANALYSIS by dose of iron                                                                       | 14             | 9385                | Mean Difference (IV, Random, 95% CI) | 30.63 [7.05, 54.22]    |
| 9.1 Low daily dose (30 mg or less of elemental iron)                                                                       | 6              | 1902                | Mean Difference (IV, Random, 95% CI) | 52.87 [-11.51, 117.26] |
| 9.2 Medium daily dose (more than 30 mg and less than 60 mg elemental iron)                                                 | 1              | 727                 | Mean Difference (IV, Random, 95% CI) | 10.0 [-51.92, 71.92]   |
| 9.3 Higher daily dose (60 mg elemental iron or more)                                                                       | 8              | 6756                | Mean Difference (IV, Random, 95% CI) | 27.56 [2.59, 52.54]    |
| 10 Birthweight (g): SUBGROUP ANALYSIS by malarial status of setting                                                        | 14             | 9385                | Mean Difference (IV, Random, 95% CI) | 30.81 [5.94, 55.68]    |
| 10.1 Malarial setting                                                                                                      | 6              | 5443                | Mean Difference (IV, Random, 95% CI) | 33.48 [10.58, 56.37]   |
| 10.2 Non-malarial setting                                                                                                  | 8              | 3942                | Mean Difference (IV, Random, 95% CI) | 25.96 [-42.06, 93.97]  |
| 11 Premature birth (less than 37 weeks of gestation) (ALL)                                                                 | 13             | 10148               | Risk Ratio (M-H, Random, 95% CI)     | 0.88 [0.77, 1.01]      |
| 12 Premature birth (less than 37 weeks of gestation): SUBGROUP ANALYSIS by gestational age at the start of supplementation | 13             | 10148               | Risk Ratio (M-H, Random, 95% CI)     | 0.88 [0.77, 1.01]      |
| 12.1 Early gestational age (supplementation started before 20 weeks' gestation or prior to pregnancy)                      | 10             | 7345                | Risk Ratio (M-H, Random, 95% CI)     | 0.93 [0.80, 1.08]      |
| 12.2 Late gestational age (supplementation started at 20 weeks of gestation or later)                                      | 2              | 477                 | Risk Ratio (M-H, Random, 95% CI)     | 0.58 [0.29, 1.13]      |
| 12.3 Unspecified or mixed 'gestational age at the start of supplementation                                                 | 1              | 2326                | Risk Ratio (M-H, Random, 95% CI)     | 0.79 [0.57, 1.09]      |
| 13 Premature birth (less than 37 weeks of gestation): SUBGROUP ANALYSIS by anaemia status at the start of supplementation  | 13             | 10148               | Risk Ratio (M-H, Random, 95% CI)     | 0.88 [0.77, 1.01]      |
| 13.1 Anaemic at start of supplementation                                                                                   | 0              | 0                   | Risk Ratio (M-H, Random, 95% CI)     | 0.0 [0.0, 0.0]         |
| 13.2 Non-anaemic at the start of supplementation                                                                           | 10             | 5699                | Risk Ratio (M-H, Random, 95% CI)     | 0.74 [0.59, 0.94]      |
| 13.3 Unspecified/ mixed anaemia status                                                                                     | 3              | 4449                | Risk Ratio (M-H, Random, 95% CI)     | 0.96 [0.81, 1.14]      |
| 14 Premature birth (less than 37 weeks of gestation): SUBGROUP ANALYSIS by dose of iron                                    | 13             | 10148               | Risk Ratio (M-H, Random, 95% CI)     | 0.88 [0.77, 1.01]      |
| 14.1 Low daily dose (30 mg or less of elemental iron)                                                                      | 5              | 1817                | Risk Ratio (M-H, Random, 95% CI)     | 0.70 [0.50, 0.98]      |
| 14.2 Medium daily dose (more than 30 mg and less than 60 mg elemental iron)                                                | 1              | 727                 | Risk Ratio (M-H, Random, 95% CI)     | 1.26 [0.62, 2.56]      |
| 14.3 Higher daily dose (60 mg elemental iron or more)                                                                      | 7              | 7604                | Risk Ratio (M-H, Random, 95% CI)     | 0.91 [0.78, 1.06]      |
| 15 Premature birth (less 37 weeks of gestation): SUBGROUP ANALYSIS by malarial status of setting                           | 13             | 10148               | Risk Ratio (M-H, Random, 95% CI)     | 0.88 [0.77, 1.01]      |
| 15.1 Malarial setting                                                                                                      | 7              | 6406                | Risk Ratio (M-H, Random, 95% CI)     | 0.95 [0.82, 1.11]      |
| 15.2 Non-malarial setting                                                                                                  | 6              | 3742                | Risk Ratio (M-H, Random, 95% CI)     | 0.69 [0.52, 0.91]      |
| 16 Neonatal death (within 28 days after delivery) (ALL)                                                                    | 4              | 7465                | Risk Ratio (M-H, Random, 95% CI)     | 0.90 [0.68, 1.19]      |
| 17 Neonatal death (within 28 days after delivery): SUBGROUP ANALYSIS by gestational age at the start of supplementation    | 4              | 7465                | Risk Ratio (M-H, Random, 95% CI)     | 0.90 [0.68, 1.19]      |
| 17.1 Early gestational age (supplementation started before 20 weeks' gestation or prior to pregnancy)                      | 3              | 4970                | Risk Ratio (M-H, Random, 95% CI)     | 1.01 [0.67, 1.53]      |

| Outcome or subgroup title                                                                                              | No. of studies | No. of participants | Statistical method               | Effect size       |
|------------------------------------------------------------------------------------------------------------------------|----------------|---------------------|----------------------------------|-------------------|
| 17.2 Late gestational age (supplementation started at 20 weeks of gestation or later)                                  | 0              | 0                   | Risk Ratio (M-H, Random, 95% CI) | 0.0 [0.0, 0.0]    |
| 17.3 Unspecified or mixed gestational age at the start of supplementation                                              | 1              | 2495                | Risk Ratio (M-H, Random, 95% CI) | 0.81 [0.56, 1.19] |
| 18 Neonatal death (within 28 days after delivery): SUBGROUP ANALYSIS by anaemia status at the start of supplementation | 4              | 7465                | Risk Ratio (M-H, Random, 95% CI) | 0.90 [0.68, 1.19] |
| 18.1 Anaemic at start of supplementation                                                                               | 0              | 0                   | Risk Ratio (M-H, Random, 95% CI) | 0.0 [0.0, 0.0]    |
| 18.2 Non-anaemic at the start of supplementation                                                                       | 2              | 3421                | Risk Ratio (M-H, Random, 95% CI) | 0.94 [0.37, 2.39] |
| 18.3 Unspecified or mixed anaemia status                                                                               | 2              | 4044                | Risk Ratio (M-H, Random, 95% CI) | 0.88 [0.65, 1.19] |
| 19 Neonatal death (within 28 days after delivery): SUBGROUP ANALYSIS by dose of iron                                   | 4              | 7465                | Risk Ratio (M-H, Random, 95% CI) | 0.90 [0.68, 1.19] |
| 19.1 Low daily dose (30 mg or less of elemental iron)                                                                  | 0              | 0                   | Risk Ratio (M-H, Random, 95% CI) | 0.0 [0.0, 0.0]    |
| 19.2 Medium daily dose (more than 30 mg and less than 60 mg elemental iron)                                            | 1              | 727                 | Risk Ratio (M-H, Random, 95% CI) | 0.48 [0.12, 1.91] |
| 19.3 Higher daily dose (60 mg elemental iron or more)                                                                  | 3              | 6738                | Risk Ratio (M-H, Random, 95% CI) | 0.92 [0.69, 1.23] |
| 20 Neonatal death (within 28 days after delivery): SUBGROUP ANALYSIS by malarial status of setting                     | 4              | 7465                | Risk Ratio (M-H, Random, 95% CI) | 0.90 [0.68, 1.19] |
| 20.1 Malarial setting                                                                                                  | 3              | 4771                | Risk Ratio (M-H, Random, 95% CI) | 0.85 [0.63, 1.15] |
| 20.2 Non-malarial setting                                                                                              | 1              | 2694                | Risk Ratio (M-H, Random, 95% CI) | 1.32 [0.58, 3.00] |
| 21 Congenital anomalies (ALL)                                                                                          | 3              | 2702                | Risk Ratio (M-H, Random, 95% CI) | 0.86 [0.55, 1.35] |
| 22 Congenital anomalies: SUBGROUP ANALYSIS by gestational age at the start of supplementation                          | 3              | 2702                | Risk Ratio (M-H, Random, 95% CI) | 0.86 [0.55, 1.35] |
| 22.1 Early gestational age (supplementation started before 20 weeks' gestation or prior to pregnancy)                  | 3              | 2702                | Risk Ratio (M-H, Random, 95% CI) | 0.86 [0.55, 1.35] |
| 22.2 Late gestational age (supplementation started at 20 weeks of gestation or later)                                  | 0              | 0                   | Risk Ratio (M-H, Random, 95% CI) | 0.0 [0.0, 0.0]    |
| 22.3 Unspecified or mixed gestational age at the start of supplementation                                              | 0              | 0                   | Risk Ratio (M-H, Random, 95% CI) | 0.0 [0.0, 0.0]    |
| 23 Congenital anomalies: SUBGROUP ANALYSIS by anaemia status at the start of supplementation                           | 3              | 2702                | Risk Ratio (M-H, Random, 95% CI) | 0.86 [0.55, 1.35] |
| 23.1 Anaemic at start of supplementation                                                                               | 0              | 0                   | Risk Ratio (M-H, Random, 95% CI) | 0.0 [0.0, 0.0]    |
| 23.2 Non-anaemic at the start of supplementation                                                                       | 1              | 300                 | Risk Ratio (M-H, Random, 95% CI) | 0.0 [0.0, 0.0]    |
| 23.3 Unspecified or mixed anaemia status                                                                               | 2              | 2402                | Risk Ratio (M-H, Random, 95% CI) | 0.86 [0.55, 1.35] |
| 24 Congenital anomalies: SUBGROUP ANALYSIS by dose of iron                                                             | 3              | 2702                | Risk Ratio (M-H, Random, 95% CI) | 0.86 [0.55, 1.35] |
| 24.1 Low daily dose (30 mg or less of elemental iron)                                                                  | 0              | 0                   | Risk Ratio (M-H, Random, 95% CI) | 0.0 [0.0, 0.0]    |
| 24.2 Medium daily dose (more than 30 mg and less than 60 mg elemental iron)                                            | 0              | 0                   | Risk Ratio (M-H, Random, 95% CI) | 0.0 [0.0, 0.0]    |
| 24.3 Higher daily dose (60 mg elemental iron or more)                                                                  | 3              | 2702                | Risk Ratio (M-H, Random, 95% CI) | 0.86 [0.55, 1.35] |
| 25 Congenital anomalies: SUBGROUP ANALYSIS by malarial status of setting                                               | 3              | 2699                | Risk Ratio (M-H, Random, 95% CI) | 0.87 [0.60, 1.26] |
| 25.1 Malarial setting                                                                                                  | 3              | 2699                | Risk Ratio (M-H, Random, 95% CI) | 0.87 [0.60, 1.26] |
| 25.2 Non-malarial setting                                                                                              | 0              | 0                   | Risk Ratio (M-H, Random, 95% CI) | 0.0 [0.0, 0.0]    |

| Outcome or subgroup title                                                                                                                                                                                               | No. of studies | No. of participants | Statistical method               | Effect size       |
|-------------------------------------------------------------------------------------------------------------------------------------------------------------------------------------------------------------------------|----------------|---------------------|----------------------------------|-------------------|
| 26 Maternal anaemia at term (Hb less than 110 g/L at 37 weeks' gestation or more) (ALL)                                                                                                                                 | 14             | 2199                | Risk Ratio (M-H, Random, 95% CI) | 0.30 [0.19, 0.46] |
| 27 Maternal anaemia at term (Hb less than 110 g/L at 37 weeks' gestation or more): SUBGROUP ANALYSIS by gestational age at the start of supplementation:                                                                | 14             | 2199                | Risk Ratio (M-H, Random, 95% CI) | 0.30 [0.19, 0.46] |
| 27.1 Early gestational age (supplementation started before 20 weeks' gestation or prior to pregnancy)                                                                                                                   | 7              | 749                 | Risk Ratio (M-H, Random, 95% CI) | 0.28 [0.12, 0.70] |
| 27.2 Late gestational age (supplementation started at 20 weeks of gestation or later)                                                                                                                                   | 5              | 1178                | Risk Ratio (M-H, Random, 95% CI) | 0.36 [0.22, 0.61] |
| 27.3 Unspecified or mixed gestational age                                                                                                                                                                               | 2              | 272                 | Risk Ratio (M-H, Random, 95% CI) | 0.08 [0.01, 0.59] |
| 28 Maternal anaemia at term (Hb less than 110 g/L at 37 weeks' gestation or more): SUBGROUP ANALYSIS by anaemia status at the start of supplementation)                                                                 | 14             | 2199                | Risk Ratio (M-H, Random, 95% CI) | 0.30 [0.19, 0.46] |
| 28.1 Anaemic at start of supplementation                                                                                                                                                                                | 0              | 0                   | Risk Ratio (M-H, Random, 95% CI) | 0.0 [0.0, 0.0]    |
| 28.2 Non-anaemic at the start of supplementation                                                                                                                                                                        | 8              | 1295                | Risk Ratio (M-H, Random, 95% CI) | 0.32 [0.16, 0.64] |
| 28.3 Unspecified or mixed anaemia status                                                                                                                                                                                | 6              | 904                 | Risk Ratio (M-H, Random, 95% CI) | 0.24 [0.12, 0.49] |
| 29 Maternal anaemia at term (Hb less than 110 g/L at 37 weeks' gestation or more): SUBGROUP ANALYSIS by dose of iron)                                                                                                   | 14             | 2199                | Risk Ratio (M-H, Random, 95% CI) | 0.30 [0.19, 0.46] |
| 29.1 Low daily dose (30 mg or less of elemental iron)                                                                                                                                                                   | 3              | 590                 | Risk Ratio (M-H, Random, 95% CI) | 0.49 [0.24, 1.03] |
| 29.2 Medium daily dose (more than 30 mg and less than 60 mg elemental iron)                                                                                                                                             | 1              | 69                  | Risk Ratio (M-H, Random, 95% CI) | 0.21 [0.06, 0.73] |
| 29.3 Higher daily dose (60 mg elemental iron or more)                                                                                                                                                                   | 10             | 1540                | Risk Ratio (M-H, Random, 95% CI) | 0.25 [0.14, 0.45] |
| 30 Maternal anaemia at term (Hb less than 110 g/L at 37 weeks' gestation or more): SUBGROUP ANALYSIS by malarial status of setting)                                                                                     | 14             | 2199                | Risk Ratio (M-H, Random, 95% CI) | 0.30 [0.19, 0.46] |
| 30.1 Malarial setting                                                                                                                                                                                                   | 3              | 530                 | Risk Ratio (M-H, Random, 95% CI) | 0.61 [0.45, 0.82] |
| 30.2 Non-malarial setting                                                                                                                                                                                               | 11             | 1669                | Risk Ratio (M-H, Random, 95% CI) | 0.18 [0.10, 0.34] |
| 31 Maternal iron deficiency at term (as defined by as defined by trialists, based on any indicator of iron status at 37 weeks' gestation or more) (ALL)                                                                 | 7              | 1256                | Risk Ratio (M-H, Random, 95% CI) | 0.43 [0.27, 0.66] |
| 32 Maternal iron deficiency at term (as defined by as defined by trialists, based on any indicator of iron status at 37 weeks' gestation or more): SUBGROUP ANALYSIS by gestational age at the start of supplementation | 7              | 1256                | Risk Ratio (M-H, Random, 95% CI) | 0.43 [0.27, 0.66] |
| 32.1 Early gestational age (supplementation started before 20 weeks' gestation or prior to pregnancy)                                                                                                                   | 4              | 653                 | Risk Ratio (M-H, Random, 95% CI) | 0.45 [0.22, 0.93] |
| 32.2 Late gestational age (supplementation started at 20 weeks of gestation or later)                                                                                                                                   | 3              | 603                 | Risk Ratio (M-H, Random, 95% CI) | 0.36 [0.18, 0.72] |
| 32.3 Unspecified or mixed gestational age                                                                                                                                                                               | 0              | 0                   | Risk Ratio (M-H, Random, 95% CI) | 0.0 [0.0, 0.0]    |
| 33 Maternal iron deficiency at term (as defined by as defined by trialists, based on any indicator of iron status at 37 weeks' gestation or more): SUBGROUP ANALYSIS by anaemia status at the start of supplementation  | 7              | 1256                | Risk Ratio (M-H, Random, 95% CI) | 0.43 [0.27, 0.66] |
| 33.1 Anaemic at start of supplementation                                                                                                                                                                                | 0              | 0                   | Risk Ratio (M-H, Random, 95% CI) | 0.0 [0.0, 0.0]    |
| 33.2 Non-anaemic at the start of supplementation                                                                                                                                                                        | 5              | 1092                | Risk Ratio (M-H, Random, 95% CI) | 0.56 [0.39, 0.82] |

| Outcome or subgroup title                                                                                                                                                                                                | No. of studies | No. of participants | Statistical method               | Effect size       |
|--------------------------------------------------------------------------------------------------------------------------------------------------------------------------------------------------------------------------|----------------|---------------------|----------------------------------|-------------------|
| 33.3 Unspecified/ mixed anaemia status                                                                                                                                                                                   | 2              | 164                 | Risk Ratio (M-H, Random, 95% CI) | 0.14 [0.07, 0.29] |
| 34 Maternal iron deficiency at term (as defined by as defined by trialists, based on any indicator of iron status at 37 weeks' gestation or more): SUBGROUP ANALYSIS by dos of iron                                      | 7              | 1256                | Risk Ratio (M-H, Random, 95% CI) | 0.43 [0.27, 0.66] |
| 34.1 Low daily dose (30 mg or less of elemental iron)                                                                                                                                                                    | 3              | 703                 | Risk Ratio (M-H, Random, 95% CI) | 0.52 [0.34, 0.78] |
| 34.2 Medium daily dose (more than 30 mg and less than 60 mg elemental iron)                                                                                                                                              | 1              | 241                 | Risk Ratio (M-H, Random, 95% CI) | 0.92 [0.73, 1.17] |
| 34.3 Higher daily dose (60 mg elemental iron or more)                                                                                                                                                                    | 3              | 312                 | Risk Ratio (M-H, Random, 95% CI) | 0.21 [0.10, 0.41] |
| 35 Maternal iron deficiency at term (as defined by trialists, based on any indicator of iron status at 37 weeks' gestation or more): SUBGROUP ANALYSIS by malarial status of setting                                     | 7              | 1256                | Risk Ratio (M-H, Random, 95% CI) | 0.43 [0.27, 0.66] |
| 35.1 Malarial setting                                                                                                                                                                                                    | 2              | 192                 | Risk Ratio (M-H, Random, 95% CI) | 0.28 [0.15, 0.53] |
| 35.2 Non-malarial setting                                                                                                                                                                                                | 5              | 1064                | Risk Ratio (M-H, Random, 95% CI) | 0.49 [0.30, 0.78] |
| 36 Maternal iron-deficiency anaemia at term (Hb less than 110 g/L and at least one additional laboratory indicators at 37 weeks' gestation or more) (ALL)                                                                | 6              | 1088                | Risk Ratio (M-H, Random, 95% CI) | 0.33 [0.16, 0.69] |
| 37 Maternal iron-deficiency anaemia at term (Hb less than 110 g/L and at least one additional laboratory indicators at 37 weeks' gestation): SUBGROUP ANALYSIS by gestational age at the start of supplementation        | 6              | 1088                | Risk Ratio (M-H, Random, 95% CI) | 0.33 [0.16, 0.69] |
| 37.1 Early gestational age (supplementation started before 20 weeks' gestation or prior to pregnancy)                                                                                                                    | 4              | 660                 | Risk Ratio (M-H, Random, 95% CI) | 0.39 [0.13, 1.11] |
| 37.2 Late gestational age (supplementation started at 20 weeks of gestation or later)                                                                                                                                    | 2              | 428                 | Risk Ratio (M-H, Random, 95% CI) | 0.25 [0.11, 0.58] |
| 37.3 Unspecified or mixed gestational age                                                                                                                                                                                | 0              | 0                   | Risk Ratio (M-H, Random, 95% CI) | 0.0 [0.0, 0.0]    |
| 38 Maternal iron-deficiency anaemia at term (Hb less than 110 g/L and at least one additional laboratory indicators at 37 weeks' gestation or more): SUBGROUP ANALYSIS by anaemia status at the start of supplementation | 6              | 1088                | Risk Ratio (M-H, Random, 95% CI) | 0.33 [0.16, 0.69] |
| 38.1 Anaemic at start of supplementation                                                                                                                                                                                 | 0              | 0                   | Risk Ratio (M-H, Random, 95% CI) | 0.0 [0.0, 0.0]    |
| 38.2 Non-anaemic at the start of supplementation                                                                                                                                                                         | 5              | 968                 | Risk Ratio (M-H, Random, 95% CI) | 0.39 [0.20, 0.74] |
| 38.3 Unspecified or mixed anaemia status                                                                                                                                                                                 | 1              | 120                 | Risk Ratio (M-H, Random, 95% CI) | 0.04 [0.00, 0.72] |
| 39 Maternal iron-deficiency anaemia at term (Hb less than 110 g/L and at least one additional laboratory indicators at 37 weeks' gestation or more): SUBGROUP ANALYSIS by dose of iron                                   | 6              | 1088                | Risk Ratio (M-H, Random, 95% CI) | 0.33 [0.16, 0.69] |
| 39.1 Low daily dose (30 mg or less of elemental iron)                                                                                                                                                                    | 3              | 579                 | Risk Ratio (M-H, Random, 95% CI) | 0.38 [0.13, 1.11] |
| 39.2 Medium daily dose (more than 30 mg and less than 60 mg elemental iron)                                                                                                                                              | 1              | 241                 | Risk Ratio (M-H, Random, 95% CI) | 0.34 [0.16, 0.70] |
| 39.3 Higher daily dose (60 mg elemental iron or more)                                                                                                                                                                    | 2              | 268                 | Risk Ratio (M-H, Random, 95% CI) | 0.04 [0.00, 0.72] |
| 40 Maternal iron-deficiency anaemia at term (Hb less than 110 g/L and at least one additional laboratory indicators at 37 weeks' gestation or more): SUBGROUP ANALYSIS by malarial status of setting                     | 6              | 1088                | Risk Ratio (M-H, Random, 95% CI) | 0.33 [0.16, 0.69] |
| 40.1 Malarial setting                                                                                                                                                                                                    | 1              | 148                 | Risk Ratio (M-H, Random, 95% CI) | 0.0 [0.0, 0.0]    |
| 40.2 Non-malarial setting                                                                                                                                                                                                | 5              | 940                 | Risk Ratio (M-H, Random, 95% CI) | 0.33 [0.16, 0.69] |

| Outcome or subgroup title                                                                                                                                            | No. of studies | No. of participants | Statistical method               | Effect size           |
|----------------------------------------------------------------------------------------------------------------------------------------------------------------------|----------------|---------------------|----------------------------------|-----------------------|
| 41 Maternal death (death while pregnant or within 42 days of termination of pregnancy) (ALL)                                                                         | 1              | 47                  | Risk Ratio (M-H, Random, 95% CI) | 0.0 [0.0, 0.0]        |
| 42 Side effects (any reported throughout the intervention period) (ALL)                                                                                              | 11             | 4418                | Risk Ratio (M-H, Random, 95% CI) | 2.36 [0.96, 5.82]     |
| 43 Side effects (any reported throughout the intervention period): SUBGROUP ANALYSIS by gestational age at the start of supplementation:                             | 11             | 4418                | Risk Ratio (M-H, Random, 95% CI) | 2.43 [1.05, 5.63]     |
| 43.1 Early gestational age (supplementation started before 20 weeks' gestation or prior to pregnancy)                                                                | 5              | 3181                | Risk Ratio (M-H, Random, 95% CI) | 2.44 [0.34, 17.39]    |
| 43.2 Late gestational age (supplementation started at 20 weeks of gestation or later)                                                                                | 5              | 1032                | Risk Ratio (M-H, Random, 95% CI) | 1.43 [0.89, 2.29]     |
| 43.3 Unspecified or mixed gestational age                                                                                                                            | 1              | 205                 | Risk Ratio (M-H, Random, 95% CI) | 62.79 [3.89, 1013.31] |
| 44 Side effects (any reported throughout the intervention period): SUBGROUP ANALYSIS by anaemia status at the start of supplementation                               | 11             | 4418                | Risk Ratio (M-H, Random, 95% CI) | 2.43 [1.05, 5.63]     |
| 44.1 Anaemic at start of supplementation                                                                                                                             | 0              | 0                   | Risk Ratio (M-H, Random, 95% CI) | 0.0 [0.0, 0.0]        |
| 44.2 Non-anaemic at the start of supplementation                                                                                                                     | 7              | 3643                | Risk Ratio (M-H, Random, 95% CI) | 1.87 [0.64, 5.45]     |
| 44.3 Unspecified or mixed anaemia status                                                                                                                             | 4              | 775                 | Risk Ratio (M-H, Random, 95% CI) | 5.16 [0.78, 34.29]    |
| 45 Side effects (any reported throughout the intervention period): SUBGROUP ANALYSIS by dose of iron                                                                 | 11             | 4418                | Risk Ratio (M-H, Random, 95% CI) | 2.36 [1.06, 5.24]     |
| 45.1 Low daily dose (30 mg or less of elemental iron)                                                                                                                | 5              | 973                 | Risk Ratio (M-H, Random, 95% CI) | 1.01 [0.84, 1.21]     |
| 45.2 Medium daily dose (more than 30 mg and less than 60 mg elemental iron)                                                                                          | 2              | 225                 | Risk Ratio (M-H, Random, 95% CI) | 2.00 [0.66, 6.02]     |
| 45.3 Higher daily dose (60 mg elemental iron or more)                                                                                                                | 6              | 3220                | Risk Ratio (M-H, Random, 95% CI) | 6.52 [1.13, 37.69]    |
| 46 Side effects (any reported throughout the intervention period): SUBGROUP ANALYSIS by malarial status of setting                                                   | 11             | 4418                | Risk Ratio (M-H, Random, 95% CI) | 2.43 [1.05, 5.63]     |
| 46.1 Malarial setting                                                                                                                                                | 1              | 205                 | Risk Ratio (M-H, Random, 95% CI) | 62.79 [3.89, 1013.31] |
| 46.2 Non-malarial setting                                                                                                                                            | 10             | 4213                | Risk Ratio (M-H, Random, 95% CI) | 2.02 [0.88, 4.65]     |
| 47 Maternal severe anaemia at any time during second and third trimester (Hb less than 70 g/L) (ALL)                                                                 | 9              | 2125                | Risk Ratio (M-H, Random, 95% CI) | 0.22 [0.01, 3.20]     |
| 48 Maternal severe anaemia at any time during second and third trimester (Hb less than 70 g/L): SUBGROUP ANALYSIS by gestational age at the start of supplementation | 9              | 2125                | Risk Ratio (M-H, Random, 95% CI) | 0.22 [0.01, 3.20]     |
| 48.1 Early gestational age (supplementation started before 20 weeks' gestation or prior to pregnancy)                                                                | 5              | 1417                | Risk Ratio (M-H, Random, 95% CI) | 0.06 [0.01, 0.47]     |
| 48.2 Late gestational age (supplementation started at 20 weeks of gestation or later)                                                                                | 3              | 559                 | Risk Ratio (M-H, Random, 95% CI) | 0.48 [0.00, 46.15]    |
| 48.3 Unspecified or mixed gestational age                                                                                                                            | 1              | 149                 | Risk Ratio (M-H, Random, 95% CI) | 0.0 [0.0, 0.0]        |
| 49 Maternal severe anaemia at any time during second and third trimester (Hb less than 70 g/L): SUBGROUP ANALYSIS by anaemia status at the start of supplementation  | 9              | 2125                | Risk Ratio (M-H, Random, 95% CI) | 0.22 [0.01, 3.20]     |
| 49.1 Anaemic at start of supplementation                                                                                                                             | 0              | 0                   | Risk Ratio (M-H, Random, 95% CI) | 0.0 [0.0, 0.0]        |
| 49.2 Non-anaemic at the start of supplementation                                                                                                                     | 5              | 1394                | Risk Ratio (M-H, Random, 95% CI) | 4.98 [0.24, 103.01]   |
| 49.3 Unspecified or mixed anaemia status                                                                                                                             | 4              | 731                 | Risk Ratio (M-H, Random, 95% CI) | 0.06 [0.01, 0.30]     |
| 50 Maternal severe anaemia at any time during second and third trimester (Hb less                                                                                    | 9              | 2125                | Risk Ratio (M-H, Random, 95% CI) | 0.22 [0.01, 3.20]     |

| Outcome or subgroup title                                                                                                                       | No. of studies | No. of participants | Statistical method                   | Effect size         |
|-------------------------------------------------------------------------------------------------------------------------------------------------|----------------|---------------------|--------------------------------------|---------------------|
| than 70 g/L): SUBGROUP ANALYSIS by dose of iron                                                                                                 |                |                     |                                      |                     |
| 50.1 Low daily dose (30 mg or less of elemental iron)                                                                                           | 3              | 654                 | Risk Ratio (M-H, Random, 95% CI)     | 4.98 [0.24, 103.01] |
| 50.2 Medium daily dose (more than 30 mg and less than 60 mg elemental iron)                                                                     | 1              | 727                 | Risk Ratio (M-H, Random, 95% CI)     | 0.0 [0.0, 0.0]      |
| 50.3 Higher daily dose (60 mg elemental iron or more)                                                                                           | 5              | 744                 | Risk Ratio (M-H, Random, 95% CI)     | 0.06 [0.01, 0.30]   |
| 51 Maternal severe anaemia at any time during second and third trimester (Hb less than 70 g/L): SUBGROUP ANALYSIS by malarial status of setting | 9              | 2125                | Risk Ratio (M-H, Random, 95% CI)     | 0.22 [0.01, 3.20]   |
| 51.1 Malarial setting                                                                                                                           | 3              | 1102                | Risk Ratio (M-H, Random, 95% CI)     | 0.06 [0.01, 0.30]   |
| 51.2 Non-malarial setting                                                                                                                       | 6              | 1023                | Risk Ratio (M-H, Random, 95% CI)     | 4.98 [0.24, 103.01] |
| 52 Maternal clinical malaria                                                                                                                    | 0              | 0                   | Risk Ratio (M-H, Random, 95% CI)     | 0.0 [0.0, 0.0]      |
| 53 Infection during pregnancy (including urinary tract infections) (ALL)                                                                        | 2              | 3421                | Risk Ratio (M-H, Random, 95% CI)     | 1.16 [0.83, 1.63]   |
| 54 Infection during pregnancy (including urinary tract infections): SUBGROUP ANALYSIS by gestational age at the start of supplementation        | 2              | 3421                | Risk Ratio (M-H, Random, 95% CI)     | 1.16 [0.83, 1.63]   |
| 54.1 Early gestational age (supplementation started before 20 weeks' gestation or prior to pregnancy)                                           | 2              | 3421                | Risk Ratio (M-H, Random, 95% CI)     | 1.16 [0.83, 1.63]   |
| 54.2 Late gestational age (supplementation started at 20 weeks of gestation or later)                                                           | 0              | 0                   | Risk Ratio (M-H, Random, 95% CI)     | 0.0 [0.0, 0.0]      |
| 54.3 Unspecified or mixed gestational age                                                                                                       | 0              | 0                   | Risk Ratio (M-H, Random, 95% CI)     | 0.0 [0.0, 0.0]      |
| 55 Infection during pregnancy (including urinary tract infections): SUBGROUP ANALYSIS by anaemia status at the start of supplementation         | 2              | 3421                | Risk Ratio (M-H, Random, 95% CI)     | 1.16 [0.83, 1.63]   |
| 55.1 Anaemic at start of supplementation                                                                                                        | 0              | 0                   | Risk Ratio (M-H, Random, 95% CI)     | 0.0 [0.0, 0.0]      |
| 55.2 Non-anaemic at the start of supplementation                                                                                                | 2              | 3421                | Risk Ratio (M-H, Random, 95% CI)     | 1.16 [0.83, 1.63]   |
| 55.3 Unspecified or mixed anaemia status                                                                                                        | 0              | 0                   | Risk Ratio (M-H, Random, 95% CI)     | 0.0 [0.0, 0.0]      |
| 56 Infection during pregnancy (including urinary tract infections): SUBGROUP ANALYSIS by dose of iron                                           | 2              | 3421                | Risk Ratio (M-H, Random, 95% CI)     | 1.16 [0.83, 1.63]   |
| 56.1 Low daily dose (30 mg or less of elemental iron)                                                                                           | 0              | 0                   | Risk Ratio (M-H, Random, 95% CI)     | 0.0 [0.0, 0.0]      |
| 56.2 Medium daily dose (more than 30 mg and less than 60 mg elemental iron)                                                                     | 1              | 727                 | Risk Ratio (M-H, Random, 95% CI)     | 1.21 [0.33, 4.46]   |
| 56.3 Higher daily dose (60 mg elemental iron or more)                                                                                           | 1              | 2694                | Risk Ratio (M-H, Random, 95% CI)     | 1.16 [0.82, 1.65]   |
| 57 Infection during pregnancy (including urinary tract infections): SUBGROUP ANALYSIS by malarial status of setting                             | 2              | 3421                | Risk Ratio (M-H, Random, 95% CI)     | 1.16 [0.83, 1.63]   |
| 57.1 Malarial setting                                                                                                                           | 1              | 727                 | Risk Ratio (M-H, Random, 95% CI)     | 1.21 [0.33, 4.46]   |
| 57.2 Non-malarial setting                                                                                                                       | 1              | 2694                | Risk Ratio (M-H, Random, 95% CI)     | 1.16 [0.82, 1.65]   |
| 58 Very low birthweight (less than 1500 g) (ALL)                                                                                                | 5              | 2687                | Risk Ratio (M-H, Random, 95% CI)     | 0.73 [0.31, 1.74]   |
| 59 Very premature birth (less than 34 weeks' gestation) (ALL)                                                                                   | 5              | 3743                | Risk Ratio (M-H, Random, 95% CI)     | 0.51 [0.29, 0.91]   |
| 60 Infant Hb concentration within the first 6 months (in g/L counting the last reported measure after birth within this period) (ALL)           | 2              | 533                 | Mean Difference (IV, Random, 95% CI) | -1.25 [-8.10, 5.59] |
| 61 Infant serum ferritin concentration within first 6 months (in µg/L counting the last                                                         | 1              | 197                 | Mean Difference (IV, Random, 95% CI) | 11.0 [4.37, 17.63]  |

| Outcome or subgroup title                                                                                                                                          | No. of studies | No. of participants | Statistical method                   | Effect size        |
|--------------------------------------------------------------------------------------------------------------------------------------------------------------------|----------------|---------------------|--------------------------------------|--------------------|
| reported measure after birth within this period) (ALL)                                                                                                             |                |                     |                                      |                    |
| 62 Admission to special care unit (ALL)                                                                                                                            | 2              | 2805                | Risk Ratio (M-H, Random, 95% CI)     | 0.95 [0.73, 1.23]  |
| 63 Maternal anaemia at or near term (Hb less than 110 g/L at 34 weeks' gestation or more) (ALL)                                                                    | 15             | 4893                | Risk Ratio (M-H, Random, 95% CI)     | 0.30 [0.19, 0.45]  |
| 64 Maternal iron deficiency at or near term (as defined by as defined by trialists, based on any indicator of iron status at 34 weeks' s gestation or more)) (ALL) | 7              | 1256                | Risk Ratio (M-H, Random, 95% CI)     | 0.43 [0.27, 0.66]  |
| 65 Maternal iron-deficiency anaemia at or near term (Hb less than 110 g/L and at least one additional laboratory indicators at 34 weeks' gestation or more) (ALL)  | 6              | 1088                | Risk Ratio (M-H, Random, 95% CI)     | 0.33 [0.16, 0.69]  |
| 66 Maternal Hb concentration at or near term (in g/L, at 34 weeks' gestation or more) (ALL)                                                                        | 19             | 3704                | Mean Difference (IV, Random, 95% CI) | 8.88 [6.96, 10.80] |
| 67 Maternal Hb concentration within 6 wk postpartum (in g/L) (ALL)                                                                                                 | 7              | 956                 | Mean Difference (IV, Random, 95% CI) | 7.61 [5.50, 9.72]  |
| 68 Maternal high haemoglobin concentrations during second or third trimester (Hb more than 130 g/L) (ALL)                                                          | 10             | 4882                | Risk Ratio (M-H, Random, 95% CI)     | 2.26 [1.40, 3.66]  |
| 69 Maternal high haemoglobin concentrations at or near term (Hb more than 130 g/L at 34 weeks' gestation or more) (ALL)                                            | 9              | 4850                | Risk Ratio (M-H, Random, 95% CI)     | 3.08 [1.28, 7.41]  |
| 70 Maternal severe anaemia at or near term (Hb less than 70 g/L at 34 weeks' gestation or more) (ALL)                                                              | 8              | 1819                | Risk Ratio (M-H, Random, 95% CI)     | 0.47 [0.01, 44.11] |
| 71 Severe anaemia at postpartum (Hb less than 80 g/L) (ALL)                                                                                                        | 8              | 1339                | Risk Ratio (M-H, Random, 95% CI)     | 0.04 [0.01, 0.28]  |
| 72 Moderate anaemia at postpartum (Hb more than 80 g/L and less than 110 g/L) (ALL)                                                                                | 3              | 766                 | Risk Ratio (M-H, Random, 95% CI)     | 0.55 [0.12, 2.51]  |
| 73 Puerperal infection (ALL)                                                                                                                                       | 4              | 4374                | Risk Ratio (M-H, Random, 95% CI)     | 0.68 [0.50, 0.92]  |
| 74 Antepartum haemorrhage (ALL)                                                                                                                                    | 2              | 1157                | Risk Ratio (M-H, Random, 95% CI)     | 1.48 [0.51, 4.31]  |
| 75 Postpartum haemorrhage (ALL)                                                                                                                                    | 4              | 1488                | Risk Ratio (M-H, Random, 95% CI)     | 0.93 [0.59, 1.49]  |
| 76 Transfusion provided (ALL)                                                                                                                                      | 3              | 3453                | Risk Ratio (M-H, Random, 95% CI)     | 0.61 [0.38, 0.96]  |
| 77 Diarrhoea (ALL)                                                                                                                                                 | 3              | 1088                | Risk Ratio (M-H, Random, 95% CI)     | 0.55 [0.32, 0.93]  |
| 78 Constipation (ALL)                                                                                                                                              | 4              | 1495                | Risk Ratio (M-H, Random, 95% CI)     | 0.95 [0.62, 1.43]  |
| 79 Nausea (ALL)                                                                                                                                                    | 4              | 1377                | Risk Ratio (M-H, Random, 95% CI)     | 1.21 [0.72, 2.03]  |
| 80 Heartburn (ALL)                                                                                                                                                 | 3              | 1323                | Risk Ratio (M-H, Random, 95% CI)     | 1.19 [0.86, 1.66]  |
| 81 Vomiting (ALL)                                                                                                                                                  | 4              | 1392                | Risk Ratio (M-H, Random, 95% CI)     | 0.88 [0.59, 1.30]  |
| 82 Maternal wellbeing/satisfaction (ALL)                                                                                                                           | 2              | 2604                | Risk Ratio (M-H, Random, 95% CI)     | 1.00 [0.91, 1.09]  |
| 83 Placental abruption (ALL)                                                                                                                                       | 3              | 2951                | Risk Ratio (M-H, Random, 95% CI)     | 1.41 [0.56, 3.59]  |
| 84 Premature rupture of membranes (ALL)                                                                                                                            | 2              | 1509                | Risk Ratio (M-H, Random, 95% CI)     | 0.95 [0.72, 1.24]  |
| 85 Pre-eclampsia (ALL)                                                                                                                                             | 4              | 1704                | Risk Ratio (M-H, Random, 95% CI)     | 1.63 [0.87, 3.07]  |



## Comparison 2

Any supplements containing iron and folic acid versus same supplements without iron nor folic acid (no iron nor folic acid or placebo)

| Outcome or subgroup title                                                                                                | No. of studies | No. of participants | Statistical method                   | Effect size          |
|--------------------------------------------------------------------------------------------------------------------------|----------------|---------------------|--------------------------------------|----------------------|
| 1 Low birthweight (less than 2500 g) (ALL)                                                                               | 2              | 1311                | Risk Ratio (M-H, Random, 95% CI)     | 1.07 [0.31, 3.74]    |
| 2 Birthweight (ALL)                                                                                                      | 2              | 1365                | Mean Difference (IV, Random, 95% CI) | 57.73 [7.66, 107.79] |
| 3 Premature birth (less than 37 weeks of gestation) (ALL)                                                                | 3              | 1497                | Risk Ratio (M-H, Random, 95% CI)     | 1.55 [0.40, 6.00]    |
| 4 Premature birth (less than 37 weeks of gestation): SUBGROUP ANALYSIS by gestation at the start of supplementation      | 3              |                     | Risk Ratio (M-H, Random, 95% CI)     | Subtotals only       |
| 4.1 Early gestational age (less than 20 weeks of gestation or pre-pregnancy) at start of supplementation                 | 2              | 1366                | Risk Ratio (M-H, Random, 95% CI)     | 1.55 [0.40, 6.00]    |
| 4.2 Late gestational age (supplementation started at 20 weeks of gestation or later)                                     | 0              | 0                   | Risk Ratio (M-H, Random, 95% CI)     | 0.0 [0.0, 0.0]       |
| 4.3 Unspecified or mixed gestational age at start of supplementation                                                     | 1              | 44                  | Risk Ratio (M-H, Random, 95% CI)     | 0.0 [0.0, 0.0]       |
| 5 Premature birth (less than 37 weeks of gestation): SUBGROUP ANALYSIS by anaemia status at the start of supplementation | 3              |                     | Risk Ratio (M-H, Random, 95% CI)     | Subtotals only       |
| 5.1 Anaemic at start of supplementation                                                                                  | 0              | 0                   | Risk Ratio (M-H, Random, 95% CI)     | 0.0 [0.0, 0.0]       |
| 5.2 Non-anaemic at the start of supplementation                                                                          | 0              | 0                   | Risk Ratio (M-H, Random, 95% CI)     | 0.0 [0.0, 0.0]       |
| 5.3 Unspecified or mixed anaemic status at start of supplementation                                                      | 3              | 1497                | Risk Ratio (M-H, Random, 95% CI)     | 1.55 [0.40, 6.00]    |
| 6 Premature birth (less than 37 weeks of gestation): SUBGROUP ANALYSIS by dose of iron                                   | 3              | 1497                | Risk Ratio (M-H, Random, 95% CI)     | 1.55 [0.40, 6.00]    |
| 6.1 Low daily dose (30 mg elemental iron or less)                                                                        | 1              | 131                 | Risk Ratio (M-H, Random, 95% CI)     | 0.0 [0.0, 0.0]       |
| 6.2 Medium daily dose (31 to 59 mg elemental iron)                                                                       | 0              | 0                   | Risk Ratio (M-H, Random, 95% CI)     | 0.0 [0.0, 0.0]       |
| 6.3 Higher daily dose (60 mg elemental iron and above)                                                                   | 2              | 1366                | Risk Ratio (M-H, Random, 95% CI)     | 1.55 [0.40, 6.00]    |
| 7 Premature birth (less than 37 weeks of gestation): SUBGROUP ANALYSIS by malarial status of settings                    | 3              | 1497                | Risk Ratio (M-H, Random, 95% CI)     | 1.55 [0.40, 6.00]    |
| 7.1 Malarial setting                                                                                                     | 2              | 1449                | Risk Ratio (M-H, Random, 95% CI)     | 1.13 [0.92, 1.39]    |
| 7.2 Non-malarial setting                                                                                                 | 1              | 48                  | Risk Ratio (M-H, Random, 95% CI)     | 7.00 [0.38, 128.61]  |
| 8 Neonatal death (within 28 days after delivery) (ALL)                                                                   | 3              | 1793                | Risk Ratio (M-H, Random, 95% CI)     | 0.81 [0.51, 1.30]    |
| 9 Neonatal death (within 28 days after delivery): SUBGROUP ANALYSIS by gestation at the start of supplementation         | 3              | 1793                | Risk Ratio (M-H, Random, 95% CI)     | 0.81 [0.51, 1.30]    |
| 9.1 Early gestational age (less than 20 weeks of gestation or pre-pregnancy) at start of supplementation                 | 3              | 1793                | Risk Ratio (M-H, Random, 95% CI)     | 0.81 [0.51, 1.30]    |
| 9.2 Late gestational age (20 weeks or more of gestation) at start of supplementation                                     | 0              | 0                   | Risk Ratio (M-H, Random, 95% CI)     | 0.0 [0.0, 0.0]       |
| 9.3 Unspecified or mixed gestational age at start of supplementation                                                     | 0              | 0                   | Risk Ratio (M-H, Random, 95% CI)     | 0.0 [0.0, 0.0]       |
| 10 Neonatal death (within 28 days after delivery): SUBGROUP ANALYSIS by anaemia status at the start of supplementation   | 3              | 1793                | Risk Ratio (M-H, Random, 95% CI)     | 0.81 [0.51, 1.30]    |
| 10.1 Anaemic at start of supplementation                                                                                 | 0              | 0                   | Risk Ratio (M-H, Random, 95% CI)     | 0.0 [0.0, 0.0]       |
| 10.2 Non-anaemic at start of supplementation                                                                             | 1              | 97                  | Risk Ratio (M-H, Random, 95% CI)     | 2.5 [0.10, 59.88]    |

| Outcome or subgroup title                                                                                                                                 | No. of studies | No. of participants | Statistical method               | Effect size       |
|-----------------------------------------------------------------------------------------------------------------------------------------------------------|----------------|---------------------|----------------------------------|-------------------|
| 10.3 Unspecified or mixed anaemic status at start of supplementation                                                                                      | 2              | 1696                | Risk Ratio (M-H, Random, 95% CI) | 0.79 [0.49, 1.27] |
| 11 Neonatal death (within 28 days after delivery): SUBGROUP ANALYSIS by dose of iron                                                                      | 3              | 1793                | Risk Ratio (M-H, Random, 95% CI) | 0.81 [0.51, 1.30] |
| 11.1 Low daily dose (30 mg elemental iron or less)                                                                                                        | 0              | 0                   | Risk Ratio (M-H, Random, 95% CI) | 0.0 [0.0, 0.0]    |
| 11.2 Medium daily dose (31 to 59 mg elemental iron)                                                                                                       | 0              | 0                   | Risk Ratio (M-H, Random, 95% CI) | 0.0 [0.0, 0.0]    |
| 11.3 Higher daily dose (60 mg elemental iron and above)                                                                                                   | 3              | 1793                | Risk Ratio (M-H, Random, 95% CI) | 0.81 [0.51, 1.30] |
| 12 Neonatal death (within 28 days after delivery): SUBGROUP ANALYSIS by malarial status at the start of supplementation                                   | 3              | 1793                | Risk Ratio (M-H, Random, 95% CI) | 0.81 [0.51, 1.30] |
| 12.1 Malarial setting                                                                                                                                     | 1              | 1648                | Risk Ratio (M-H, Random, 95% CI) | 0.79 [0.49, 1.27] |
| 12.2 Non-malarial setting                                                                                                                                 | 2              | 145                 | Risk Ratio (M-H, Random, 95% CI) | 2.5 [0.10, 59.88] |
| 13 Congenital anomalies (ALL)                                                                                                                             | 1              | 1652                | Risk Ratio (M-H, Random, 95% CI) | 0.70 [0.35, 1.40] |
| 14 Maternal anaemia at term (Hb less than 110 g/L at 37 weeks' gestation or more) (ALL)                                                                   | 3              | 346                 | Risk Ratio (M-H, Random, 95% CI) | 0.34 [0.21, 0.54] |
| 15 Maternal anaemia at term (Hb less than 110 g/L at 37 weeks' gestation or more): SUBGROUP ANALYSIS by gestation at the start of supplementation         | 3              | 346                 | Risk Ratio (M-H, Random, 95% CI) | 0.34 [0.21, 0.54] |
| 15.1 Early gestational age (less than 20 weeks of gestation or pre-pregnancy) at start of supplementation                                                 | 1              | 97                  | Risk Ratio (M-H, Random, 95% CI) | 0.0 [0.0, 0.0]    |
| 15.2 Late gestational age (20 weeks or more of gestation) at start of supplementation                                                                     | 1              | 66                  | Risk Ratio (M-H, Random, 95% CI) | 0.37 [0.22, 0.62] |
| 15.3 Unspecified or mixed gestational age at start of supplementation                                                                                     | 1              | 183                 | Risk Ratio (M-H, Random, 95% CI) | 0.24 [0.09, 0.68] |
| 16 Maternal anaemia at term (Hb less than 110 g/L at 37 weeks' gestation or more): SUBGROUP ANALYSIS by anaemia status at the start of supplementation    | 3              | 346                 | Risk Ratio (M-H, Random, 95% CI) | 0.34 [0.21, 0.54] |
| 16.1 Anaemic at start of supplementation                                                                                                                  | 0              | 0                   | Risk Ratio (M-H, Random, 95% CI) | 0.0 [0.0, 0.0]    |
| 16.2 Non-anaemic at start of supplementation                                                                                                              | 2              | 280                 | Risk Ratio (M-H, Random, 95% CI) | 0.24 [0.09, 0.68] |
| 16.3 Unspecified or mixed anaemic status at start of supplementation                                                                                      | 1              | 66                  | Risk Ratio (M-H, Random, 95% CI) | 0.37 [0.22, 0.62] |
| 17 Maternal anaemia at term (Hb less than 110 g/L at 37 weeks' gestation or more): SUBGROUP ANALYSIS by dose of iron                                      | 3              | 346                 | Risk Ratio (M-H, Random, 95% CI) | 0.34 [0.21, 0.54] |
| 17.1 Low daily dose (30 mg elemental iron or less)                                                                                                        | 0              | 0                   | Risk Ratio (M-H, Random, 95% CI) | 0.0 [0.0, 0.0]    |
| 17.2 Medium daily dose (31 to 59 mg elemental iron)                                                                                                       | 0              | 0                   | Risk Ratio (M-H, Random, 95% CI) | 0.0 [0.0, 0.0]    |
| 17.3 Higher daily dose (60 mg elemental iron and above)                                                                                                   | 3              | 346                 | Risk Ratio (M-H, Random, 95% CI) | 0.34 [0.21, 0.54] |
| 18 Maternal anaemia at term (Hb less than 110 g/L at 37 weeks' gestation or more): SUBGROUP ANALYSIS by malarial status of setting                        | 3              | 346                 | Risk Ratio (M-H, Random, 95% CI) | 0.34 [0.21, 0.54] |
| 18.1 Malarial setting                                                                                                                                     | 1              | 66                  | Risk Ratio (M-H, Random, 95% CI) | 0.37 [0.22, 0.62] |
| 18.2 Non-malarial setting                                                                                                                                 | 2              | 280                 | Risk Ratio (M-H, Random, 95% CI) | 0.24 [0.09, 0.68] |
| 19 Maternal iron deficiency at term (as defined by trialists, based on any indicator of iron status at 37 weeks' gestation or more) (ALL)                 | 1              | 131                 | Risk Ratio (M-H, Random, 95% CI) | 0.24 [0.06, 0.99] |
| 20 Maternal iron deficiency anaemia at term (Hb less than 110 g/L and at least one additional laboratory indicators at 37 weeks' gestation or more) (ALL) | 1              | 131                 | Risk Ratio (M-H, Random, 95% CI) | 0.43 [0.17, 1.09] |

| Outcome or subgroup title                                                                                                                                           | No. of studies | No. of participants | Statistical method               | Effect size          |
|---------------------------------------------------------------------------------------------------------------------------------------------------------------------|----------------|---------------------|----------------------------------|----------------------|
| 21 Maternal death (death while pregnant or within 42 days of termination of pregnancy) (ALL)                                                                        | 1              | 131                 | Risk Ratio (M-H, Random, 95% CI) | 0.0 [0.0, 0.0]       |
| 22 Side effects (any reported throughout the intervention period) (ALL)                                                                                             | 1              | 456                 | Risk Ratio (M-H, Random, 95% CI) | 44.32 [2.77, 709.09] |
| 23 Maternal severe anaemia at any time during second and third trimester (Hb less than 70 g/L) (ALL)                                                                | 4              | 506                 | Risk Ratio (M-H, Random, 95% CI) | 0.12 [0.02, 0.63]    |
| 24 Maternal severe anaemia at any time during second and third trimester (Hb less than 70 g/L): SUBGROUP ANALYSIS by gestation at the start of supplementation      | 4              | 506                 | Risk Ratio (M-H, Random, 95% CI) | 0.12 [0.02, 0.63]    |
| 24.1 Early gestational age (less than 20 weeks of gestation or pre-pregnancy) at start of supplementation                                                           | 3              | 456                 | Risk Ratio (M-H, Random, 95% CI) | 0.11 [0.01, 0.83]    |
| 24.2 Late gestational age (20 weeks or more of gestation) at start of supplementation                                                                               | 1              | 50                  | Risk Ratio (M-H, Random, 95% CI) | 0.14 [0.01, 2.63]    |
| 24.3 Unspecified or mixed gestational age at start of supplementation                                                                                               | 0              | 0                   | Risk Ratio (M-H, Random, 95% CI) | 0.0 [0.0, 0.0]       |
| 25 Maternal severe anaemia at any time during second and third trimester (Hb less than 70 g/L): SUBGROUP ANALYSIS by anaemia status at the start of supplementation | 4              | 506                 | Risk Ratio (M-H, Random, 95% CI) | 0.12 [0.02, 0.63]    |
| 25.1 Anaemic at start of supplementation                                                                                                                            | 0              | 0                   | Risk Ratio (M-H, Random, 95% CI) | 0.0 [0.0, 0.0]       |
| 25.2 Non-anaemic at start of supplementation                                                                                                                        | 1              | 97                  | Risk Ratio (M-H, Random, 95% CI) | 0.0 [0.0, 0.0]       |
| 25.3 Unspecified or mixed anaemic status at start of supplementation                                                                                                | 3              | 409                 | Risk Ratio (M-H, Random, 95% CI) | 0.12 [0.02, 0.63]    |
| 26 Maternal severe anaemia at any time during second and third trimester (Hb less than 70 g/L): SUBGROUP ANALYSIS by dose of iron                                   | 4              | 506                 | Risk Ratio (M-H, Random, 95% CI) | 0.12 [0.02, 0.63]    |
| 26.1 Low daily dose (30 mg elemental iron or less)                                                                                                                  | 1              | 44                  | Risk Ratio (M-H, Random, 95% CI) | 0.0 [0.0, 0.0]       |
| 26.2 Medium daily dose (31 to 59 mg elemental iron)                                                                                                                 | 0              | 0                   | Risk Ratio (M-H, Random, 95% CI) | 0.0 [0.0, 0.0]       |
| 26.3 Higher daily dose (60 mg elemental iron and above)                                                                                                             | 3              | 462                 | Risk Ratio (M-H, Random, 95% CI) | 0.12 [0.02, 0.63]    |
| 27 Maternal severe anaemia at any time during second and third trimester (Hb less than 70 g/L): SUBGROUP ANALYSIS by malarial status of setting                     | 4              | 506                 | Risk Ratio (M-H, Random, 95% CI) | 0.12 [0.02, 0.63]    |
| 27.1 Malarial setting                                                                                                                                               | 3              | 409                 | Risk Ratio (M-H, Random, 95% CI) | 0.12 [0.02, 0.63]    |
| 27.2 Non-malarial setting                                                                                                                                           | 1              | 97                  | Risk Ratio (M-H, Random, 95% CI) | 0.0 [0.0, 0.0]       |
| 28 Maternal clinical malaria                                                                                                                                        | 0              | 0                   | Risk Ratio (M-H, Random, 95% CI) | 0.0 [0.0, 0.0]       |
| 29 Infection during pregnancy (including urinary tract infections) (ALL)                                                                                            | 1              | 48                  | Risk Ratio (M-H, Random, 95% CI) | 1.0 [0.15, 6.53]     |
| 30 Very low birthweight (less than 1500 g) (ALL)                                                                                                                    | 1              | 48                  | Risk Ratio (M-H, Random, 95% CI) | 5.0 [0.25, 98.96]    |
| 31 Very premature birth (less than 34 weeks' gestation) (ALL)                                                                                                       | 2              | 92                  | Risk Ratio (M-H, Random, 95% CI) | 5.0 [0.25, 98.96]    |
| 32 Admission to special care unit (ALL)                                                                                                                             | 1              | 48                  | Risk Ratio (M-H, Random, 95% CI) | 0.0 [0.0, 0.0]       |
| 33 Maternal anaemia at or near term (Hb less than 110 g/L at 34 weeks' gestation or more) (ALL)                                                                     | 3              | 346                 | Risk Ratio (M-H, Random, 95% CI) | 0.34 [0.21, 0.54]    |
| 34 Maternal iron deficiency at or near term (as defined by trialists, based on any indicator of iron status at 34 weeks' gestation or more) (ALL)                   | 1              | 131                 | Risk Ratio (M-H, Random, 95% CI) | 0.24 [0.06, 0.99]    |
| 35 Maternal iron-deficiency anaemia at or near term (Hb less than 110 g/L and at least one additional laboratory indicators at 34 weeks' gestation or more) (ALL)   | 1              | 131                 | Risk Ratio (M-H, Random, 95% CI) | 0.43 [0.17, 1.09]    |

| Outcome or subgroup title                                                                                               | No. of studies | No. of participants | Statistical method                   | Effect size          |
|-------------------------------------------------------------------------------------------------------------------------|----------------|---------------------|--------------------------------------|----------------------|
| 36 Maternal Hb concentration at or near term (in g/L, at 34 weeks' gestation or more) (ALL)                             | 3              | 140                 | Mean Difference (IV, Random, 95% CI) | 16.13 [12.74, 19.52] |
| 37 Maternal Hb concentration within 6 wk postpartum (in g/L) (ALL)                                                      | 2              | 459                 | Mean Difference (IV, Random, 95% CI) | 10.07 [7.33, 12.81]  |
| 38 Maternal high haemoglobin concentrations during second or third trimester (Hb more than 130 g/L) (ALL)               | 2              | 446                 | Risk Ratio (M-H, Random, 95% CI)     | 1.78 [0.63, 5.04]    |
| 39 Maternal high haemoglobin concentrations at or near term (Hb more than 130 g/L at 34 weeks' gestation or more) (ALL) | 2              | 314                 | Risk Ratio (M-H, Random, 95% CI)     | 4.37 [0.58, 32.71]   |
| 40 Moderate anaemia at postpartum (Hb more than 80 g/L and less than 110 g/L) (ALL)                                     | 3              | 491                 | Risk Ratio (M-H, Random, 95% CI)     | 0.33 [0.17, 0.65]    |
| 41 Maternal severe anaemia at or near term (Hb less than 70 g/L at 34 weeks' gestation or more) (ALL)                   | 3              | 191                 | Risk Ratio (M-H, Random, 95% CI)     | 0.14 [0.01, 2.63]    |
| 42 Severe anaemia at postpartum (Hb less than 80 g/L) (ALL)                                                             | 3              | 491                 | Risk Ratio (M-H, Random, 95% CI)     | 0.05 [0.00, 0.76]    |
| 43 Puerperal infection (ALL)                                                                                            | 1              | 2863                | Risk Ratio (M-H, Random, 95% CI)     | 0.55 [0.13, 2.28]    |
| 44 Antepartum haemorrhage (ALL)                                                                                         | 2              | 145                 | Risk Ratio (M-H, Random, 95% CI)     | 1.25 [0.22, 7.12]    |
| 45 Postpartum haemorrhage (ALL)                                                                                         | 0              | 0                   | Risk Ratio (M-H, Random, 95% CI)     | 0.0 [0.0, 0.0]       |
| 46 Placental abruption (ALL)                                                                                            | 1              | 2863                | Risk Ratio (M-H, Random, 95% CI)     | 8.19 [0.49, 138.16]  |
| 47 Pre-eclampsia (ALL)                                                                                                  | 1              | 48                  | Risk Ratio (M-H, Random, 95% CI)     | 3.0 [0.13, 70.16]    |

### Comparison 3

#### Supplementation with iron alone versus no treatment/placebo

| Outcome or subgroup title                                                                                  | No. of studies | No. of participants | Statistical method               | Effect size        |
|------------------------------------------------------------------------------------------------------------|----------------|---------------------|----------------------------------|--------------------|
| 1 Low birthweight (less than 2500 g) (ALL)                                                                 | 7              | 3830                | Risk Ratio (M-H, Random, 95% CI) | 0.71 [0.42, 1.19]  |
| 2 Low birthweight (less than 2500 g): SUBGROUP ANALYSIS by gestational age at the start of supplementation | 7              | 3830                | Risk Ratio (M-H, Random, 95% CI) | 0.71 [0.42, 1.19]  |
| 2.1 Early gestational age (less than 20 weeks of gestation or pre-pregnancy) at start of supplementation   | 3              | 3055                | Risk Ratio (M-H, Random, 95% CI) | 0.53 [0.22, 1.23]  |
| 2.2 Late gestational age (20 weeks or more of gestation) at start of supplementation                       | 3              | 665                 | Risk Ratio (M-H, Random, 95% CI) | 1.05 [0.50, 2.19]  |
| 2.3 Unspecified or mixed gestational age at the start of supplementation                                   | 1              | 110                 | Risk Ratio (M-H, Random, 95% CI) | 1.79 [0.17, 19.20] |
| 3 Low birthweight (less than 2500 g): SUBGROUP ANALYSIS by anaemia status at the start of supplementation  | 7              | 3830                | Risk Ratio (M-H, Random, 95% CI) | 0.71 [0.42, 1.19]  |
| 3.1 Anaemic at start of supplementation                                                                    | 0              | 0                   | Risk Ratio (M-H, Random, 95% CI) | 0.0 [0.0, 0.0]     |
| 3.2 Non-anaemic at start of supplementation                                                                | 6              | 3649                | Risk Ratio (M-H, Random, 95% CI) | 0.72 [0.39, 1.32]  |
| 3.3 Unspecified or mixed anaemic status at start of supplementation                                        | 1              | 181                 | Risk Ratio (M-H, Random, 95% CI) | 0.57 [0.14, 2.31]  |
| 4 Low birthweight (less than 2500 g): SUBGROUP ANALYSIS by dose of iron                                    | 7              | 3830                | Risk Ratio (M-H, Random, 95% CI) | 0.71 [0.42, 1.19]  |
| 4.1 Low daily dose (30 mg elemental iron or less)                                                          | 3              | 697                 | Risk Ratio (M-H, Random, 95% CI) | 0.59 [0.12, 2.96]  |
| 4.2 Medium daily dose (31 to 59 mg elemental iron)                                                         | 0              | 0                   | Risk Ratio (M-H, Random, 95% CI) | 0.0 [0.0, 0.0]     |
| 4.3 Higher daily dose (60 mg elemental iron and above)                                                     | 4              | 3133                | Risk Ratio (M-H, Random, 95% CI) | 0.83 [0.56, 1.23]  |

| Outcome or subgroup title                                                                                                  | No. of studies | No. of participants | Statistical method                   | Effect size            |
|----------------------------------------------------------------------------------------------------------------------------|----------------|---------------------|--------------------------------------|------------------------|
| 5 Low birthweight (less than 2500 g): SUBGROUP ANALYSIS by malarial status of setting                                      | 7              | 3830                | Risk Ratio (M-H, Random, 95% CI)     | 0.71 [0.42, 1.19]      |
| 5.1 Malarial setting                                                                                                       | 2              | 329                 | Risk Ratio (M-H, Random, 95% CI)     | 0.52 [0.20, 1.35]      |
| 5.2 Non-malarial setting                                                                                                   | 5              | 3501                | Risk Ratio (M-H, Random, 95% CI)     | 0.77 [0.38, 1.57]      |
| 6 Birthweight (g) (ALL)                                                                                                    | 9              | 3953                | Mean Difference (IV, Random, 95% CI) | 16.43 [-37.28, 70.14]  |
| 7 Birthweight (g): SUBGROUP ANALYSIS by gestational age at the start of supplementation                                    | 9              | 3953                | Mean Difference (IV, Random, 95% CI) | 16.43 [-37.28, 70.14]  |
| 7.1 Early gestational age (less than 20 weeks of gestation or pre-pregnancy) at start of supplementation                   | 5              | 3099                | Mean Difference (IV, Random, 95% CI) | 30.74 [-83.78, 145.25] |
| 7.2 Late gestational age (20 weeks or more of gestation) at start of supplementation                                       | 4              | 854                 | Mean Difference (IV, Random, 95% CI) | -8.70 [-74.71, 57.31]  |
| 7.3 Unspecified or mixed gestational age at the start of supplementation                                                   | 0              | 0                   | Mean Difference (IV, Random, 95% CI) | 0.0 [0.0, 0.0]         |
| 8 Birthweight (g): SUBGROUP ANALYSIS by anaemia status at the start of supplementation                                     | 9              | 3953                | Mean Difference (IV, Random, 95% CI) | 16.43 [-37.28, 70.14]  |
| 8.1 Anaemic at start of supplementation                                                                                    | 0              | 0                   | Mean Difference (IV, Random, 95% CI) | 0.0 [0.0, 0.0]         |
| 8.2 Non-anaemic at start of supplementation                                                                                | 7              | 3583                | Mean Difference (IV, Random, 95% CI) | 22.44 [-54.15, 99.03]  |
| 8.3 Unspecified or mixed anaemic status at start of supplementation                                                        | 2              | 370                 | Mean Difference (IV, Random, 95% CI) | 0.90 [-86.32, 88.12]   |
| 9 Birthweight (g): SUBGROUP ANALYSIS by dose of iron                                                                       | 9              | 3953                | Mean Difference (IV, Random, 95% CI) | 15.73 [-33.92, 65.38]  |
| 9.1 Low daily dose (30 mg elemental iron or less)                                                                          | 4              | 785                 | Mean Difference (IV, Random, 95% CI) | 46.83 [-76.57, 170.22] |
| 9.2 Medium daily dose (31 to 59 mg elemental iron)                                                                         | 0              | 0                   | Mean Difference (IV, Random, 95% CI) | 0.0 [0.0, 0.0]         |
| 9.3 Higher daily dose (60 mg elemental iron and above)                                                                     | 6              | 3168                | Mean Difference (IV, Random, 95% CI) | 12.51 [-25.07, 50.10]  |
| 10 Birthweight (g): SUBGROUP ANALYSIS by malarial status of setting                                                        | 9              | 3953                | Mean Difference (IV, Random, 95% CI) | 16.43 [-37.28, 70.14]  |
| 10.1 Malarial setting                                                                                                      | 2              | 345                 | Mean Difference (IV, Random, 95% CI) | 33.74 [-61.16, 128.65] |
| 10.2 Non-malarial setting                                                                                                  | 7              | 3608                | Mean Difference (IV, Random, 95% CI) | 10.18 [-65.06, 85.42]  |
| 11 Premature birth (less than 37 weeks of gestation) (ALL)                                                                 | 7              | 4407                | Risk Ratio (M-H, Random, 95% CI)     | 0.77 [0.60, 1.00]      |
| 12 Premature birth (less than 37 weeks of gestation): SUBGROUP ANALYSIS by gestational age at the start of supplementation | 7              | 4407                | Risk Ratio (M-H, Random, 95% CI)     | 0.77 [0.60, 1.00]      |
| 12.1 Early gestational age (less than 20 weeks of gestation or pre-pregnancy) at start of supplementation                  | 5              | 3930                | Risk Ratio (M-H, Random, 95% CI)     | 0.81 [0.61, 1.07]      |
| 12.2 Late gestational age (20 weeks or more of gestation) at start of supplementation                                      | 2              | 477                 | Risk Ratio (M-H, Random, 95% CI)     | 0.58 [0.29, 1.13]      |
| 12.3 Unspecified or mixed gestational age at start of supplementation                                                      | 0              | 0                   | Risk Ratio (M-H, Random, 95% CI)     | 0.0 [0.0, 0.0]         |
| 13 Premature birth (less than 37 weeks of gestation): SUBGROUP ANALYSIS by anaemia status at the start of supplementation  | 7              | 4407                | Risk Ratio (M-H, Random, 95% CI)     | 0.77 [0.60, 1.00]      |
| 13.1 Anaemic at start of supplementation                                                                                   | 0              | 0                   | Risk Ratio (M-H, Random, 95% CI)     | 0.0 [0.0, 0.0]         |
| 13.2 Non-anaemic at start of supplementation                                                                               | 6              | 3545                | Risk Ratio (M-H, Random, 95% CI)     | 0.71 [0.53, 0.97]      |
| 13.3 Unspecified or mixed anaemic status at start of supplementation                                                       | 1              | 862                 | Risk Ratio (M-H, Random, 95% CI)     | 0.95 [0.58, 1.57]      |
| 14 Premature birth (less than 37 weeks of gestation): SUBGROUP ANALYSIS by dose of iron                                    | 7              | 4407                | Risk Ratio (M-H, Random, 95% CI)     | 0.77 [0.60, 1.00]      |

| Outcome or subgroup title                                                                                                                                                                                 | No. of studies | No. of participants | Statistical method               | Effect size       |
|-----------------------------------------------------------------------------------------------------------------------------------------------------------------------------------------------------------|----------------|---------------------|----------------------------------|-------------------|
| 14.1 Low daily dose (30 mg elemental iron or less)                                                                                                                                                        | 3              | 690                 | Risk Ratio (M-H, Random, 95% CI) | 0.76 [0.47, 1.24] |
| 14.2 Medium daily dose (31 to 59 mg elemental iron)                                                                                                                                                       | 0              | 0                   | Risk Ratio (M-H, Random, 95% CI) | 0.0 [0.0, 0.0]    |
| 14.3 Higher daily dose (60 mg elemental iron and above)                                                                                                                                                   | 4              | 3717                | Risk Ratio (M-H, Random, 95% CI) | 0.78 [0.57, 1.05] |
| 15 Premature birth (less 37 weeks of gestation): SUBGROUP ANALYSIS by malarial status of setting                                                                                                          | 7              | 4407                | Risk Ratio (M-H, Random, 95% CI) | 0.77 [0.60, 1.00] |
| 15.1 Malarial setting                                                                                                                                                                                     | 2              | 1010                | Risk Ratio (M-H, Random, 95% CI) | 0.87 [0.54, 1.39] |
| 15.2 Non-malarial setting                                                                                                                                                                                 | 5              | 3397                | Risk Ratio (M-H, Random, 95% CI) | 0.73 [0.54, 0.99] |
| 16 Neonatal death (within 28 days after delivery) (ALL)                                                                                                                                                   | 1              | 2694                | Risk Ratio (M-H, Random, 95% CI) | 1.32 [0.58, 3.00] |
| 17 Congenital anomalies (ALL)                                                                                                                                                                             | 2              | 2402                | Risk Ratio (M-H, Random, 95% CI) | 0.86 [0.55, 1.35] |
| 18 Maternal anaemia at term (Hb less than 110 g/L at 37 weeks' gestation or more) (ALL)                                                                                                                   | 14             | 2136                | Risk Ratio (M-H, Random, 95% CI) | 0.29 [0.19, 0.47] |
| 19 Maternal anaemia at term (Hb less than 110 g/L at 37 weeks' gestation or more): SUBGROUP ANALYSIS by gestational age at the start of supplementation                                                   | 14             | 4693                | Risk Ratio (M-H, Random, 95% CI) | 0.26 [0.17, 0.40] |
| 19.1 Early gestational age (less than 20 weeks of gestation or pre-pregnancy) at start of supplementation                                                                                                 | 7              | 3243                | Risk Ratio (M-H, Random, 95% CI) | 0.24 [0.12, 0.50] |
| 19.2 Late gestational age (20 weeks or more of gestation) at start of supplementation                                                                                                                     | 6              | 1301                | Risk Ratio (M-H, Random, 95% CI) | 0.32 [0.20, 0.53] |
| 19.3 Unspecified or mixed gestational age at start of supplementation                                                                                                                                     | 1              | 149                 | Risk Ratio (M-H, Random, 95% CI) | 0.03 [0.00, 0.18] |
| 20 Maternal anaemia at term (Hb less than 110 g/L at 37 weeks gestation or more): SUBGROUP ANALYSIS by anaemia status at the start of supplementation                                                     | 14             | 4630                | Risk Ratio (M-H, Random, 95% CI) | 0.26 [0.16, 0.41] |
| 20.1 Anaemic at start of supplementation                                                                                                                                                                  | 0              | 0                   | Risk Ratio (M-H, Random, 95% CI) | 0.0 [0.0, 0.0]    |
| 20.2 Non-anaemic at start of supplementation                                                                                                                                                              | 9              | 3938                | Risk Ratio (M-H, Random, 95% CI) | 0.23 [0.13, 0.41] |
| 20.3 Unspecified or mixed anaemic status at start of supplementation                                                                                                                                      | 5              | 692                 | Risk Ratio (M-H, Random, 95% CI) | 0.34 [0.18, 0.64] |
| 21 Maternal anaemia at term (Hb less than 110 g/L at 37 weeks' gestation or more): SUBGROUP ANALYSIS by dose of iron                                                                                      | 14             | 4693                | Risk Ratio (M-H, Random, 95% CI) | 0.26 [0.17, 0.40] |
| 21.1 Low daily dose (30 mg elemental iron or less)                                                                                                                                                        | 3              | 590                 | Risk Ratio (M-H, Random, 95% CI) | 0.49 [0.24, 1.03] |
| 21.2 Medium daily dose (31 to 59 mg elemental iron)                                                                                                                                                       | 1              | 69                  | Risk Ratio (M-H, Random, 95% CI) | 0.21 [0.06, 0.73] |
| 21.3 Higher daily dose (60 mg elemental iron and above)                                                                                                                                                   | 10             | 4034                | Risk Ratio (M-H, Random, 95% CI) | 0.21 [0.12, 0.37] |
| 22 Maternal anaemia at term (Hb less than 110 g/L at 37 weeks' gestation or more): SUBGROUP ANALYSIS by malarial status of setting                                                                        | 14             | 4630                | Risk Ratio (M-H, Random, 95% CI) | 0.26 [0.16, 0.41] |
| 22.1 Malarial setting                                                                                                                                                                                     | 2              | 267                 | Risk Ratio (M-H, Random, 95% CI) | 0.58 [0.46, 0.72] |
| 22.2 Non-malarial setting                                                                                                                                                                                 | 12             | 4363                | Risk Ratio (M-H, Random, 95% CI) | 0.21 [0.12, 0.34] |
| 23 Maternal iron deficiency at term (as defined by trialists, based on any indicator of iron status at 37 weeks' gestation or more) (ALL)                                                                 | 7              | 1256                | Risk Ratio (M-H, Random, 95% CI) | 0.43 [0.27, 0.66] |
| 24 Maternal iron deficiency at term (as defined by trialists, based on any indicator of iron status at 37 weeks' gestation or more): SUBGROUP ANALYSIS by gestational age at the start of supplementation | 7              | 1256                | Risk Ratio (M-H, Random, 95% CI) | 0.43 [0.27, 0.66] |

| Outcome or subgroup title                                                                                                                                                                                                 | No. of studies | No. of participants | Statistical method               | Effect size       |
|---------------------------------------------------------------------------------------------------------------------------------------------------------------------------------------------------------------------------|----------------|---------------------|----------------------------------|-------------------|
| 24.1 Early gestational age (less than 20 weeks of gestation or pre-pregnancy) at start of supplementation                                                                                                                 | 4              | 653                 | Risk Ratio (M-H, Random, 95% CI) | 0.45 [0.22, 0.93] |
| 24.2 Late gestational age (20 weeks or more of gestation) at start of supplementation                                                                                                                                     | 3              | 603                 | Risk Ratio (M-H, Random, 95% CI) | 0.36 [0.18, 0.72] |
| 24.3 Unspecified or mixed gestational age at start of supplementation                                                                                                                                                     | 0              | 0                   | Risk Ratio (M-H, Random, 95% CI) | 0.0 [0.0, 0.0]    |
| 25 Maternal iron deficiency at term (as defined by trialists, based on any indicator of iron status at 37 weeks' gestation or more): SUBGROUP ANALYSIS by anaemia status at the start of supplementation                  | 7              | 1256                | Risk Ratio (M-H, Random, 95% CI) | 0.43 [0.27, 0.66] |
| 25.1 Anaemic at start of supplementation                                                                                                                                                                                  | 0              | 0                   | Risk Ratio (M-H, Random, 95% CI) | 0.0 [0.0, 0.0]    |
| 25.2 Non-anaemic at start of supplementation                                                                                                                                                                              | 5              | 1092                | Risk Ratio (M-H, Random, 95% CI) | 0.56 [0.39, 0.82] |
| 25.3 Unspecified or mixed anaemic status at start of supplementation                                                                                                                                                      | 2              | 164                 | Risk Ratio (M-H, Random, 95% CI) | 0.14 [0.07, 0.29] |
| 26 Maternal iron deficiency at term (as defined by trialists, based on any indicator of iron status at 37 weeks' gestation or more): SUBGROUP ANALYSIS by dose of iron                                                    | 7              | 1256                | Risk Ratio (M-H, Random, 95% CI) | 0.43 [0.27, 0.66] |
| 26.1 Low daily dose (30 mg elemental iron or less)                                                                                                                                                                        | 3              | 703                 | Risk Ratio (M-H, Random, 95% CI) | 0.52 [0.34, 0.78] |
| 26.2 Medium daily dose (31 to 59 mg elemental iron)                                                                                                                                                                       | 1              | 241                 | Risk Ratio (M-H, Random, 95% CI) | 0.92 [0.73, 1.17] |
| 26.3 Higher daily dose (60 mg elemental iron and above)                                                                                                                                                                   | 3              | 312                 | Risk Ratio (M-H, Random, 95% CI) | 0.21 [0.10, 0.41] |
| 27 Maternal iron deficiency at term (as defined by trialists, based on any indicator of iron status at 37 weeks' gestation or more): SUBGROUP ANALYSIS by malarial status of setting                                      | 7              | 1256                | Risk Ratio (M-H, Random, 95% CI) | 0.43 [0.27, 0.66] |
| 27.1 Malarial setting                                                                                                                                                                                                     | 2              | 192                 | Risk Ratio (M-H, Random, 95% CI) | 0.28 [0.15, 0.53] |
| 27.2 Non-malarial setting                                                                                                                                                                                                 | 5              | 1064                | Risk Ratio (M-H, Random, 95% CI) | 0.49 [0.30, 0.78] |
| 28 Maternal iron-deficiency anaemia at term (Hb less than 110 g/L and at least one additional laboratory indicators at 37 weeks' gestation or more) (ALL)                                                                 | 6              | 1088                | Risk Ratio (M-H, Random, 95% CI) | 0.33 [0.16, 0.69] |
| 29 Maternal iron-deficiency anaemia at term (Hb less than 110 g/L and at least one additional laboratory indicators at 37 weeks' gestation or more): SUBGROUP ANALYSIS by gestational age at the start of supplementation | 6              | 1088                | Risk Ratio (M-H, Random, 95% CI) | 0.33 [0.16, 0.69] |
| 29.1 Early gestational age (less than 20 weeks of gestation or pre-pregnancy) at start of supplementation                                                                                                                 | 4              | 660                 | Risk Ratio (M-H, Random, 95% CI) | 0.39 [0.13, 1.11] |
| 29.2 Late gestational age (20 weeks or more of gestation) at start of supplementation                                                                                                                                     | 2              | 428                 | Risk Ratio (M-H, Random, 95% CI) | 0.25 [0.11, 0.58] |
| 29.3 Unspecified or mixed gestational age at start of supplementation                                                                                                                                                     | 0              | 0                   | Risk Ratio (M-H, Random, 95% CI) | 0.0 [0.0, 0.0]    |
| 30 Maternal iron-deficiency anaemia at term (Hb less than 110 g/L and at least one additional laboratory indicators at 37 weeks' gestation or more): SUBGROUP ANALYSIS by anaemia status at the start of supplementation  | 6              | 1088                | Risk Ratio (M-H, Random, 95% CI) | 0.33 [0.16, 0.69] |
| 30.1 Anaemic at start of supplementation                                                                                                                                                                                  | 0              | 0                   | Risk Ratio (M-H, Random, 95% CI) | 0.0 [0.0, 0.0]    |
| 30.2 Non-anaemic at start of supplementation                                                                                                                                                                              | 5              | 968                 | Risk Ratio (M-H, Random, 95% CI) | 0.39 [0.20, 0.74] |
| 30.3 Unspecified or mixed anaemic status at start of supplementation                                                                                                                                                      | 1              | 120                 | Risk Ratio (M-H, Random, 95% CI) | 0.04 [0.00, 0.72] |
| 31 Maternal iron-deficiency anaemia at term (Hb less than 110 g/L and at least one additional laboratory indicators at 37 weeks' gestation or more)                                                                       | 6              | 1088                | Risk Ratio (M-H, Random, 95% CI) | 0.33 [0.16, 0.69] |

| Outcome or subgroup title                                                                                                                                                                            | No. of studies | No. of participants | Statistical method               | Effect size           |
|------------------------------------------------------------------------------------------------------------------------------------------------------------------------------------------------------|----------------|---------------------|----------------------------------|-----------------------|
| gestation or more): SUBGROUP ANALYSIS by dose of iron                                                                                                                                                |                |                     |                                  |                       |
| 31.1 Daily low dose (60 mg elemental iron or less)                                                                                                                                                   | 3              | 579                 | Risk Ratio (M-H, Random, 95% CI) | 0.38 [0.13, 1.11]     |
| 31.2 Medium dose (31 to 59 mg elemental iron)                                                                                                                                                        | 1              | 241                 | Risk Ratio (M-H, Random, 95% CI) | 0.34 [0.16, 0.70]     |
| 31.3 High dose (60 mg elemental iron and above)                                                                                                                                                      | 2              | 268                 | Risk Ratio (M-H, Random, 95% CI) | 0.04 [0.00, 0.72]     |
| 32 Maternal iron-deficiency anaemia at term (Hb less than 110 g/L and at least one additional laboratory indicators at 37 weeks' gestation or more): SUBGROUP ANALYSIS by malarial status of setting | 6              | 1088                | Risk Ratio (M-H, Random, 95% CI) | 0.33 [0.16, 0.69]     |
| 32.1 Malarial setting                                                                                                                                                                                | 1              | 148                 | Risk Ratio (M-H, Random, 95% CI) | 0.0 [0.0, 0.0]        |
| 32.2 Non-malarial setting                                                                                                                                                                            | 5              | 940                 | Risk Ratio (M-H, Random, 95% CI) | 0.33 [0.16, 0.69]     |
| 33 Maternal death (death while pregnant or within 42 days of termination of pregnancy) (ALL)                                                                                                         | 1              | 47                  | Risk Ratio (M-H, Random, 95% CI) | 0.0 [0.0, 0.0]        |
| 34 Side effects (any reported throughout the intervention period) (ALL)                                                                                                                              | 10             | 4232                | Risk Ratio (M-H, Random, 95% CI) | 2.92 [1.10, 7.76]     |
| 35 Side effects (any reported throughout the intervention period): SUBGROUP ANALYSIS by gestational age at the start of supplementation                                                              | 10             | 4232                | Risk Ratio (M-H, Random, 95% CI) | 2.92 [1.10, 7.76]     |
| 35.1 Early gestational age (less than 20 weeks of gestation or pre-pregnancy) at start of supplementation                                                                                            | 4              | 2993                | Risk Ratio (M-H, Random, 95% CI) | 3.65 [0.40, 33.51]    |
| 35.2 Late gestational age (20 weeks or more of gestation) at start of supplementation                                                                                                                | 5              | 1034                | Risk Ratio (M-H, Random, 95% CI) | 1.42 [0.89, 2.28]     |
| 35.3 Unspecified or mixed gestational age at start of supplementation                                                                                                                                | 1              | 205                 | Risk Ratio (M-H, Random, 95% CI) | 62.79 [3.89, 1013.31] |
| 36 Side effects (any reported throughout the intervention period): SUBGROUP ANALYSIS by anaemia status at the start of supplementation                                                               | 10             | 4232                | Risk Ratio (M-H, Random, 95% CI) | 2.92 [1.10, 7.76]     |
| 36.1 Anaemic at start of supplementation                                                                                                                                                             | 0              | 0                   | Risk Ratio (M-H, Random, 95% CI) | 0.0 [0.0, 0.0]        |
| 36.2 Non-anaemic at start of supplementation                                                                                                                                                         | 6              | 3455                | Risk Ratio (M-H, Random, 95% CI) | 2.25 [0.57, 8.93]     |
| 36.3 Unspecified or mixed anaemic status at start of supplementation                                                                                                                                 | 4              | 777                 | Risk Ratio (M-H, Random, 95% CI) | 5.11 [0.78, 33.60]    |
| 37 Side effects (any reported throughout the intervention period): SUBGROUP ANALYSIS by dose of iron                                                                                                 | 10             | 4232                | Risk Ratio (M-H, Random, 95% CI) | 2.75 [1.10, 6.89]     |
| 37.1 Low daily dose (30 mg elemental iron or less)                                                                                                                                                   | 4              | 785                 | Risk Ratio (M-H, Random, 95% CI) | 1.07 [0.90, 1.26]     |
| 37.2 Medium daily dose (31 to 59 mg elemental iron)                                                                                                                                                  | 2              | 225                 | Risk Ratio (M-H, Random, 95% CI) | 2.00 [0.66, 6.02]     |
| 37.3 Higher daily dose (60 mg elemental iron and above)                                                                                                                                              | 6              | 3222                | Risk Ratio (M-H, Random, 95% CI) | 7.95 [1.38, 45.72]    |
| 38 Side effects (any reported throughout the intervention period): SUBGROUP ANALYSIS by malarial status of setting                                                                                   | 10             | 4232                | Risk Ratio (M-H, Random, 95% CI) | 2.92 [1.10, 7.76]     |
| 38.1 Malarial setting                                                                                                                                                                                | 1              | 205                 | Risk Ratio (M-H, Random, 95% CI) | 62.79 [3.89, 1013.31] |
| 38.2 Non-malarial setting                                                                                                                                                                            | 9              | 4027                | Risk Ratio (M-H, Random, 95% CI) | 2.35 [0.89, 6.24]     |
| 39 Maternal severe anaemia at any time during second and third trimester (Hb less than 70 g/L) (ALL)                                                                                                 | 7              | 1078                | Risk Ratio (M-H, Random, 95% CI) | 0.75 [0.02, 29.10]    |
| 40 Maternal severe anaemia at any time during second and third trimester (Hb less than 70 g/L): SUBGROUP ANALYSIS by gestational age at the start of supplementation                                 | 7              | 1078                | Risk Ratio (M-H, Random, 95% CI) | 0.75 [0.02, 29.10]    |



| Outcome or subgroup title                                                                                                                                               | No. of studies | No. of participants | Statistical method                   | Effect size         |
|-------------------------------------------------------------------------------------------------------------------------------------------------------------------------|----------------|---------------------|--------------------------------------|---------------------|
| 40.1 Early gestational age (less than 20 weeks of gestation or pre-pregnancy) at start of supplementation                                                               | 3              | 416                 | Risk Ratio (M-H, Random, 95% CI)     | 0.0 [0.0, 0.0]      |
| 40.2 Late gestational age (20 weeks or more of gestation) at start of supplementation                                                                                   | 3              | 513                 | Risk Ratio (M-H, Random, 95% CI)     | 0.75 [0.02, 29.10]  |
| 40.3 Unspecified or mixed gestational age at start of supplementation                                                                                                   | 1              | 149                 | Risk Ratio (M-H, Random, 95% CI)     | 0.0 [0.0, 0.0]      |
| 41 Maternal severe anaemia at any time during second and third trimester (Hb less than 70 g/L): SUBGROUP ANALYSIS by anaemia status age at the start of supplementation | 7              | 1078                | Risk Ratio (M-H, Random, 95% CI)     | 0.75 [0.02, 29.10]  |
| 41.1 Anaemic at start of supplementation                                                                                                                                | 0              | 0                   | Risk Ratio (M-H, Random, 95% CI)     | 0.0 [0.0, 0.0]      |
| 41.2 Non-anaemic at start of supplementation                                                                                                                            | 5              | 816                 | Risk Ratio (M-H, Random, 95% CI)     | 4.98 [0.24, 103.01] |
| 41.3 Unspecified or mixed anaemic status at start of supplementation                                                                                                    | 2              | 262                 | Risk Ratio (M-H, Random, 95% CI)     | 0.12 [0.01, 2.21]   |
| 42 Maternal severe anaemia at any time during second and third trimester (Hb less than 70 g/L): SUBGROUP ANALYSIS by dose of iron                                       | 7              | 1078                | Risk Ratio (M-H, Random, 95% CI)     | 0.75 [0.02, 29.10]  |
| 42.1 Low daily dose (30 mg elemental iron or less)                                                                                                                      | 3              | 654                 | Risk Ratio (M-H, Random, 95% CI)     | 4.98 [0.24, 103.01] |
| 42.2 Medium daily dose (31 to 59 mg elemental iron)                                                                                                                     | 0              | 0                   | Risk Ratio (M-H, Random, 95% CI)     | 0.0 [0.0, 0.0]      |
| 42.3 Higher daily dose (60 mg elemental iron and above)                                                                                                                 | 4              | 424                 | Risk Ratio (M-H, Random, 95% CI)     | 0.12 [0.01, 2.21]   |
| 43 Maternal severe anaemia at any time during second and third trimester (Hb less than 70 g/L): SUBGROUP ANALYSIS by malarial status of setting                         | 7              | 1078                | Risk Ratio (M-H, Random, 95% CI)     | 0.75 [0.02, 29.10]  |
| 43.1 Malarial setting                                                                                                                                                   | 1              | 55                  | Risk Ratio (M-H, Random, 95% CI)     | 0.12 [0.01, 2.21]   |
| 43.2 Non-malarial setting                                                                                                                                               | 6              | 1023                | Risk Ratio (M-H, Random, 95% CI)     | 4.98 [0.24, 103.01] |
| 44 Maternal clinical malaria                                                                                                                                            | 0              | 0                   | Risk Ratio (M-H, Random, 95% CI)     | 0.0 [0.0, 0.0]      |
| 45 Infection during pregnancy (including urinary tract infections) (ALL)                                                                                                | 1              | 2694                | Risk Ratio (M-H, Random, 95% CI)     | 1.16 [0.82, 1.65]   |
| 46 Very low birthweight (less than 1500 g) (ALL)                                                                                                                        | 3              | 697                 | Risk Ratio (M-H, Random, 95% CI)     | 0.55 [0.03, 9.07]   |
| 47 Very premature birth (less than 34 weeks' gestation) (ALL)                                                                                                           | 3              | 690                 | Risk Ratio (M-H, Random, 95% CI)     | 0.32 [0.10, 1.09]   |
| 48 Infant Hb concentration in the first 6 months (in g/L, counting the last reported measure after birth within this period) (ALL)                                      | 2              | 533                 | Mean Difference (IV, Random, 95% CI) | -1.25 [-8.10, 5.59] |
| 49 Infant serum ferritin concentration in the first 6 months (in µg/L, counting the last reported measure after birth within this period) (ALL)                         | 1              | 197                 | Mean Difference (IV, Random, 95% CI) | 11.0 [4.37, 17.63]  |
| 50 Admission to special care unit (ALL)                                                                                                                                 | 2              | 2805                | Risk Ratio (M-H, Random, 95% CI)     | 0.95 [0.73, 1.23]   |
| 51 Maternal anaemia at or near term (Hb less than 110 g/L at 34 weeks' gestation or more) (ALL)                                                                         | 14             | 4390                | Risk Ratio (M-H, Random, 95% CI)     | 0.29 [0.19, 0.45]   |
| 52 Maternal iron deficiency at or near term (as defined by trialists, based on any indicator of iron status at 34 weeks' gestation or more) (ALL)                       | 7              | 1256                | Risk Ratio (M-H, Random, 95% CI)     | 0.43 [0.27, 0.66]   |
| 53 Maternal iron-deficiency anaemia at or near term (Hb less than 110 g/L and at least one additional laboratory indicators at 34 weeks' gestation or more) (ALL)       | 6              | 1088                | Risk Ratio (M-H, Random, 95% CI)     | 0.33 [0.16, 0.69]   |
| 54 Maternal Hb concentration at or near term (in g/L, at 34 weeks' gestation or more) (ALL)                                                                             | 16             | 1851                | Mean Difference (IV, Random, 95% CI) | 8.95 [6.37, 11.53]  |
| 55 Maternal Hb concentration within 6 wk postpartum (in g/L) (ALL)                                                                                                      | 6              | 659                 | Mean Difference (IV, Random, 95% CI) | 7.26 [4.78, 9.74]   |

| Outcome or subgroup title                                                                                               | No. of studies | No. of participants | Statistical method               | Effect size        |
|-------------------------------------------------------------------------------------------------------------------------|----------------|---------------------|----------------------------------|--------------------|
| 56 Maternal high haemoglobin concentrations during second or third trimester (Hb more than 130 g/L) (ALL)               | 8              | 3840                | Risk Ratio (M-H, Random, 95% CI) | 1.81 [1.21, 2.71]  |
| 57 Maternal high haemoglobin concentrations at or near term (Hb more than 130 g/L at 34 weeks' gestation or more) (ALL) | 8              | 3883                | Risk Ratio (M-H, Random, 95% CI) | 3.67 [2.23, 6.04]  |
| 58 Moderate anaemia at postpartum (Hb more than 80 g/L and less than 110 g/L) (ALL)                                     | 3              | 453                 | Risk Ratio (M-H, Random, 95% CI) | 0.46 [0.02, 13.91] |
| 59 Maternal severe anaemia at or near term (Hb less than 70 g/L at 34 weeks' gestation or more) (ALL)                   | 7              | 1046                | Risk Ratio (M-H, Random, 95% CI) | 0.74 [0.02, 27.81] |
| 60 Severe anaemia at postpartum (Hb less than 80 g/L) (ALL)                                                             | 7              | 953                 | Risk Ratio (M-H, Random, 95% CI) | 0.02 [0.00, 0.33]  |
| 61 Puerperal infection (ALL)                                                                                            | 2              | 2292                | Risk Ratio (M-H, Random, 95% CI) | 0.65 [0.41, 1.03]  |
| 62 Antepartum haemorrhage (ALL)                                                                                         | 1              | 430                 | Risk Ratio (M-H, Random, 95% CI) | 2.97 [0.12, 72.56] |
| 63 Postpartum haemorrhage (ALL)                                                                                         | 3              | 761                 | Risk Ratio (M-H, Random, 95% CI) | 0.82 [0.51, 1.34]  |
| 64 Transfusion provided (ALL)                                                                                           | 2              | 2726                | Risk Ratio (M-H, Random, 95% CI) | 0.59 [0.37, 0.94]  |
| 65 Diarrhoea (ALL)                                                                                                      | 1              | 173                 | Risk Ratio (M-H, Random, 95% CI) | 0.98 [0.09, 10.61] |
| 66 Constipation (ALL)                                                                                                   | 2              | 580                 | Risk Ratio (M-H, Random, 95% CI) | 0.88 [0.18, 4.40]  |
| 67 Nausea (ALL)                                                                                                         | 3              | 650                 | Risk Ratio (M-H, Random, 95% CI) | 2.38 [0.49, 11.52] |
| 68 Heartburn (ALL)                                                                                                      | 1              | 408                 | Risk Ratio (M-H, Random, 95% CI) | 1.0 [0.82, 1.22]   |
| 69 Vomiting (ALL)                                                                                                       | 2              | 477                 | Risk Ratio (M-H, Random, 95% CI) | 0.88 [0.38, 2.07]  |
| 70 Maternal wellbeing/satisfaction (ALL)                                                                                | 2              | 2604                | Risk Ratio (M-H, Random, 95% CI) | 1.00 [0.91, 1.09]  |
| 71 Placental abruption (ALL)                                                                                            | 1              | 1442                | Risk Ratio (M-H, Random, 95% CI) | 2.88 [0.12, 70.53] |
| 72 Premature rupture of membranes (ALL)                                                                                 | 0              | 0                   | Risk Ratio (M-H, Random, 95% CI) | 0.0 [0.0, 0.0]     |
| 73 Pre-eclampsia (ALL)                                                                                                  | 1              | 47                  | Risk Ratio (M-H, Random, 95% CI) | 0.96 [0.06, 14.43] |

#### Comparison 4

#### Supplementation with iron+folic acid versus no treatment/placebo

| Outcome or subgroup title                                                                                                 | No. of studies | No. of participants | Statistical method                   | Effect size          |
|---------------------------------------------------------------------------------------------------------------------------|----------------|---------------------|--------------------------------------|----------------------|
| 1 Low birthweight (less than 2500 g) (ALL)                                                                                | 2              | 1311                | Risk Ratio (M-H, Random, 95% CI)     | 1.07 [0.31, 3.74]    |
| 2 Birthweight (ALL)                                                                                                       | 2              | 1365                | Mean Difference (IV, Random, 95% CI) | 57.73 [7.66, 107.79] |
| 3 Premature birth (less than 37 weeks of gestation) (ALL)                                                                 | 3              | 1497                | Risk Ratio (M-H, Random, 95% CI)     | 1.55 [0.40, 6.00]    |
| 4 Premature birth (less than 37 weeks of gestation): SUBGROUP ANALYSIS by gestational age at the start of supplementation | 3              | 1410                | Risk Ratio (M-H, Random, 95% CI)     | 1.55 [0.40, 6.00]    |
| 4.1 Early gestational age (less than 20 weeks of gestation or pre-pregnancy) at start of supplementation                  | 2              | 1366                | Risk Ratio (M-H, Random, 95% CI)     | 1.55 [0.40, 6.00]    |
| 4.2 Late gestational age (20 weeks or more of gestation) at start of supplementation                                      | 0              | 0                   | Risk Ratio (M-H, Random, 95% CI)     | 0.0 [0.0, 0.0]       |
| 4.3 Unspecified or mixed gestational age at start of supplementation                                                      | 1              | 44                  | Risk Ratio (M-H, Random, 95% CI)     | 0.0 [0.0, 0.0]       |

| Outcome or subgroup title                                                                                                | No. of studies | No. of participants | Statistical method               | Effect size         |
|--------------------------------------------------------------------------------------------------------------------------|----------------|---------------------|----------------------------------|---------------------|
| 5 Premature birth (less than 37 weeks of gestation): SUBGROUP ANALYSIS by anaemia status at the start of supplementation | 3              | 1497                | Risk Ratio (M-H, Random, 95% CI) | 1.55 [0.40, 6.00]   |
| 5.1 Anaemic at start of supplementation                                                                                  | 0              | 0                   | Risk Ratio (M-H, Random, 95% CI) | 0.0 [0.0, 0.0]      |
| 5.2 Non-anaemic at start of supplementation                                                                              | 0              | 0                   | Risk Ratio (M-H, Random, 95% CI) | 0.0 [0.0, 0.0]      |
| 5.3 Unspecified or mixed anaemic status at start of supplementation                                                      | 3              | 1497                | Risk Ratio (M-H, Random, 95% CI) | 1.55 [0.40, 6.00]   |
| 6 Premature birth (less than 37 weeks of gestation): SUBGROUP ANALYSIS by dose of iron                                   | 3              | 1497                | Risk Ratio (M-H, Random, 95% CI) | 1.55 [0.40, 6.00]   |
| 6.1 Low daily dose (30 mg elemental iron or less)                                                                        | 1              | 131                 | Risk Ratio (M-H, Random, 95% CI) | 0.0 [0.0, 0.0]      |
| 6.2 Medium daily dose (31 to 59 mg elemental iron)                                                                       | 0              | 0                   | Risk Ratio (M-H, Random, 95% CI) | 0.0 [0.0, 0.0]      |
| 6.3 Higher daily dose (60 mg elemental iron and above)                                                                   | 2              | 1366                | Risk Ratio (M-H, Random, 95% CI) | 1.55 [0.40, 6.00]   |
| 7 Premature birth (less than 37 weeks of gestation): SUBGROUP ANALYSIS by malarial status of setting                     | 3              | 1497                | Risk Ratio (M-H, Random, 95% CI) | 1.55 [0.40, 6.00]   |
| 7.1 Malarial setting                                                                                                     | 2              | 1449                | Risk Ratio (M-H, Random, 95% CI) | 1.13 [0.92, 1.39]   |
| 7.2 Non-malarial setting                                                                                                 | 1              | 48                  | Risk Ratio (M-H, Random, 95% CI) | 7.00 [0.38, 128.61] |
| 8 Neonatal death (within 28 days after delivery) (ALL)                                                                   | 3              | 1793                | Risk Ratio (M-H, Random, 95% CI) | 0.81 [0.51, 1.30]   |
| 9 Neonatal death (within 28 days after delivery): SUBGROUP ANALYSIS by gestational age at start of supplementation       | 3              | 1793                | Risk Ratio (M-H, Random, 95% CI) | 0.81 [0.51, 1.30]   |
| 9.1 Early gestational age (less than 20 weeks of gestation or pre-pregnancy) at start of supplementation                 | 3              | 1793                | Risk Ratio (M-H, Random, 95% CI) | 0.81 [0.51, 1.30]   |
| 9.2 Late gestational age (20 weeks or more of gestation) at start of supplementation                                     | 0              | 0                   | Risk Ratio (M-H, Random, 95% CI) | 0.0 [0.0, 0.0]      |
| 9.3 Unspecified or mixed gestational age at start of supplementation                                                     | 0              | 0                   | Risk Ratio (M-H, Random, 95% CI) | 0.0 [0.0, 0.0]      |
| 10 Neonatal death (within 28 days after delivery): SUBGROUP ANALYSIS by anaemia status at start of supplementation       | 3              | 1793                | Risk Ratio (M-H, Random, 95% CI) | 0.81 [0.51, 1.30]   |
| 10.1 Anaemic at start of supplementation                                                                                 | 0              | 0                   | Risk Ratio (M-H, Random, 95% CI) | 0.0 [0.0, 0.0]      |
| 10.2 Non-anaemic at start of supplementation                                                                             | 1              | 97                  | Risk Ratio (M-H, Random, 95% CI) | 2.5 [0.10, 59.88]   |
| 10.3 Unspecified or mixed anaemic status at start of supplementation                                                     | 2              | 1696                | Risk Ratio (M-H, Random, 95% CI) | 0.79 [0.49, 1.27]   |
| 11 Neonatal death (within 28 days after delivery): SUBGROUP ANALYSIS by dose of iron                                     | 3              | 1793                | Risk Ratio (M-H, Random, 95% CI) | 0.81 [0.51, 1.30]   |
| 11.1 Low daily dose (30 mg elemental iron or less)                                                                       | 0              | 0                   | Risk Ratio (M-H, Random, 95% CI) | 0.0 [0.0, 0.0]      |
| 11.2 Medium daily dose (31 to 59 mg elemental iron)                                                                      | 0              | 0                   | Risk Ratio (M-H, Random, 95% CI) | 0.0 [0.0, 0.0]      |
| 11.3 Higher daily dose (60 mg elemental iron and above)                                                                  | 3              | 1793                | Risk Ratio (M-H, Random, 95% CI) | 0.81 [0.51, 1.30]   |
| 12 Neonatal death (within 28 days after delivery): SUBGROUP ANALYSIS by malarial status of setting                       | 3              | 1793                | Risk Ratio (M-H, Random, 95% CI) | 0.81 [0.51, 1.30]   |
| 12.1 Malarial setting                                                                                                    | 1              | 1648                | Risk Ratio (M-H, Random, 95% CI) | 0.79 [0.49, 1.27]   |
| 12.2 Non-malarial setting                                                                                                | 2              | 145                 | Risk Ratio (M-H, Random, 95% CI) | 2.5 [0.10, 59.88]   |
| 13 Congenital anomalies (ALL)                                                                                            | 1              | 1652                | Risk Ratio (M-H, Random, 95% CI) | 0.70 [0.35, 1.40]   |
| 14 Maternal anaemia at term (Hb less than 110 g/L at 37 weeks' gestation or more) (ALL)                                  | 3              | 346                 | Risk Ratio (M-H, Random, 95% CI) | 0.34 [0.21, 0.54]   |

| Outcome or subgroup title                                                                                                                                  | No. of studies | No. of participants | Statistical method                   | Effect size          |
|------------------------------------------------------------------------------------------------------------------------------------------------------------|----------------|---------------------|--------------------------------------|----------------------|
| 15 Maternal anaemia at term (Hb less than 110 g/L at 37 weeks' gestation or more):<br>SUBGROUP ANALYSIS by gestational age at the start of supplementation | 3              | 346                 | Risk Ratio (M-H, Random, 95% CI)     | 0.34 [0.21, 0.54]    |
| 15.1 Early gestational age (less than 20 weeks of gestation or pre-pregnancy) at start of supplementation                                                  | 1              | 97                  | Risk Ratio (M-H, Random, 95% CI)     | 0.0 [0.0, 0.0]       |
| 15.2 Late gestational age (20 weeks or more of gestation) at start of supplementation                                                                      | 2              | 249                 | Risk Ratio (M-H, Random, 95% CI)     | 0.34 [0.21, 0.54]    |
| 15.3 Unspecified or mixed gestational age at start of supplementation                                                                                      | 0              | 0                   | Risk Ratio (M-H, Random, 95% CI)     | 0.0 [0.0, 0.0]       |
| 16 Maternal anaemia at term (Hb less than 110 g/L at 37 weeks' gestation or more):<br>SUBGROUP ANALYSIS by anaemia status at the start of supplementation  | 3              | 346                 | Risk Ratio (M-H, Random, 95% CI)     | 0.34 [0.21, 0.54]    |
| 16.1 Anaemic at start of supplementation                                                                                                                   | 0              | 0                   | Risk Ratio (M-H, Random, 95% CI)     | 0.0 [0.0, 0.0]       |
| 16.2 Non-anaemic at start of supplementation                                                                                                               | 2              | 280                 | Risk Ratio (M-H, Random, 95% CI)     | 0.24 [0.09, 0.68]    |
| 16.3 Unspecified or mixed anaemic status at start of supplementation                                                                                       | 1              | 66                  | Risk Ratio (M-H, Random, 95% CI)     | 0.37 [0.22, 0.62]    |
| 17 Maternal anaemia at term (Hb less than 110 g/L at 37 weeks' gestation or more):<br>SUBGROUP ANALYSIS by dose of iron                                    | 3              | 346                 | Risk Ratio (M-H, Random, 95% CI)     | 0.34 [0.21, 0.54]    |
| 17.1 Low daily dose (30 mg elemental iron or less)                                                                                                         | 0              | 0                   | Risk Ratio (M-H, Random, 95% CI)     | 0.0 [0.0, 0.0]       |
| 17.2 Medium daily dose (31 to 59 mg elemental iron)                                                                                                        | 0              | 0                   | Risk Ratio (M-H, Random, 95% CI)     | 0.0 [0.0, 0.0]       |
| 17.3 Higher daily dose (60 mg elemental iron and above)                                                                                                    | 3              | 346                 | Risk Ratio (M-H, Random, 95% CI)     | 0.34 [0.21, 0.54]    |
| 18 Maternal anaemia at term (Hb less than 110 g/L at 37 weeks' gestation or more):<br>SUBGROUP ANALYSIS by malarial status of setting                      | 3              | 346                 | Risk Ratio (M-H, Random, 95% CI)     | 0.34 [0.21, 0.54]    |
| 18.1 Malarial setting                                                                                                                                      | 1              | 66                  | Risk Ratio (M-H, Random, 95% CI)     | 0.37 [0.22, 0.62]    |
| 18.2 Non-malarial setting                                                                                                                                  | 2              | 280                 | Risk Ratio (M-H, Random, 95% CI)     | 0.24 [0.09, 0.68]    |
| 19 Maternal iron deficiency at term (as defined by trialists, based on any indicator of iron status at 37 weeks' gestation or more) (ALL)                  | 1              | 131                 | Risk Ratio (M-H, Random, 95% CI)     | 0.24 [0.06, 0.99]    |
| 20 Maternal iron-deficiency anaemia at term (Hb less than 110 g/L and at least one additional laboratory indicators at 37 weeks' gestation or more) (ALL)  | 1              | 131                 | Risk Ratio (M-H, Random, 95% CI)     | 0.43 [0.17, 1.09]    |
| 21 Maternal death (death while pregnant or within 42 days of termination of pregnancy) (ALL)                                                               | 1              | 131                 | Risk Ratio (M-H, Random, 95% CI)     | 0.0 [0.0, 0.0]       |
| 22 Side effects (any reported throughout the intervention period) (ALL)                                                                                    | 1              | 456                 | Risk Ratio (M-H, Random, 95% CI)     | 44.32 [2.77, 709.09] |
| 23 Maternal severe anaemia at any time during second and third trimester (Hb less than 70 g/L) (ALL)                                                       | 4              | 506                 | Risk Ratio (M-H, Random, 95% CI)     | 0.12 [0.02, 0.63]    |
| 24 Maternal clinical malaria                                                                                                                               | 0              | 0                   | Risk Ratio (M-H, Random, 95% CI)     | 0.0 [0.0, 0.0]       |
| 25 Infection during pregnancy (including urinary tract infections) (ALL)                                                                                   | 1              | 48                  | Risk Ratio (M-H, Random, 95% CI)     | 1.0 [0.15, 6.53]     |
| 26 Very low birthweight (less than 1500 g) (ALL)                                                                                                           | 1              | 48                  | Risk Ratio (M-H, Random, 95% CI)     | 5.0 [0.25, 98.96]    |
| 27 Very premature birth (less than 34 weeks' gestation) (ALL)                                                                                              | 2              | 92                  | Risk Ratio (M-H, Random, 95% CI)     | 5.0 [0.25, 98.96]    |
| 28 Infant Hb concentration in the first 6 months (in g/L, counting the last reported measure after birth within this period) (ALL)                         | 0              | 0                   | Mean Difference (IV, Random, 95% CI) | 0.0 [0.0, 0.0]       |
| 29 Infant serum ferritin concentration in the first 6 months (in µg/L, counting the last reported measure after birth within this period) (ALL)            | 0              | 0                   | Mean Difference (IV, Random, 95% CI) | 0.0 [0.0, 0.0]       |

| Outcome or subgroup title                                                                                                                                         | No. of studies | No. of participants | Statistical method                   | Effect size          |
|-------------------------------------------------------------------------------------------------------------------------------------------------------------------|----------------|---------------------|--------------------------------------|----------------------|
| 30 Admission to special care unit (ALL)                                                                                                                           | 1              | 48                  | Risk Ratio (M-H, Random, 95% CI)     | 0.0 [0.0, 0.0]       |
| 31 Maternal anaemia at or near term (Hb less than 110 g/L at 34 weeks' gestation or more) (ALL)                                                                   | 3              | 346                 | Risk Ratio (M-H, Random, 95% CI)     | 0.34 [0.21, 0.54]    |
| 32 Maternal iron deficiency at or near term (as defined by trialists, based on any indicator of iron status at 34 weeks' gestation or more) (ALL)                 | 1              | 131                 | Risk Ratio (M-H, Random, 95% CI)     | 0.24 [0.06, 0.99]    |
| 33 Maternal iron-deficiency anaemia at or near term (Hb less than 110 g/L and at least one additional laboratory indicators at 34 weeks' gestation or more) (ALL) | 1              | 131                 | Risk Ratio (M-H, Random, 95% CI)     | 0.43 [0.17, 1.09]    |
| 34 Maternal Hb concentration at term or near term (in g/L, at 34 weeks' gestation or more) (ALL)                                                                  | 3              | 140                 | Mean Difference (IV, Random, 95% CI) | 16.13 [12.74, 19.52] |
| 35 Maternal Hb concentration within 6 wk postpartum (g/L) (ALL)                                                                                                   | 2              | 459                 | Mean Difference (IV, Random, 95% CI) | 10.07 [7.33, 12.81]  |
| 36 Maternal high haemoglobin concentrations during second or third trimester (Hb more than 130 g/L) (ALL)                                                         | 2              | 446                 | Risk Ratio (M-H, Random, 95% CI)     | 1.78 [0.63, 5.04]    |
| 37 Maternal high haemoglobin concentrations at or near term (Hb more than 130 g/L at 34 weeks' gestation or more) (ALL)                                           | 2              | 314                 | Risk Ratio (M-H, Random, 95% CI)     | 4.37 [0.58, 32.71]   |
| 38 Moderate anaemia at postpartum (Hb more than 80 g/L and less than 110 g/L) (ALL)                                                                               | 2              | 458                 | Risk Ratio (M-H, Random, 95% CI)     | 0.34 [0.17, 0.69]    |
| 39 Maternal severe anaemia at term or near (Hb less than 70 g/L at 34 weeks' gestation or more) (ALL)                                                             | 3              | 191                 | Risk Ratio (M-H, Random, 95% CI)     | 0.14 [0.01, 2.63]    |
| 40 Severe anaemia at postpartum (Hb less than 80 g/L) (ALL)                                                                                                       | 3              | 491                 | Risk Ratio (M-H, Random, 95% CI)     | 0.05 [0.00, 0.76]    |
| 41 Puerperal infection (ALL)                                                                                                                                      | 1              | 2863                | Risk Ratio (M-H, Random, 95% CI)     | 0.55 [0.13, 2.28]    |
| 42 Antepartum haemorrhage (ALL)                                                                                                                                   | 2              | 145                 | Risk Ratio (M-H, Random, 95% CI)     | 1.25 [0.22, 7.12]    |
| 43 Postpartum haemorrhage (ALL)                                                                                                                                   | 0              | 0                   | Risk Ratio (M-H, Random, 95% CI)     | 0.0 [0.0, 0.0]       |
| 44 Placental abruption (ALL)                                                                                                                                      | 1              | 2863                | Risk Ratio (M-H, Random, 95% CI)     | 8.19 [0.49, 138.16]  |
| 45 Pre-eclampsia (ALL)                                                                                                                                            | 1              | 48                  | Risk Ratio (M-H, Random, 95% CI)     | 3.0 [0.13, 70.16]    |

### Comparison 5

#### Supplementation with iron+folic acid versus folic acid alone (without iron) supplementation

| Outcome or subgroup title                                                                                  | No. of studies | No. of participants | Statistical method               | Effect size       |
|------------------------------------------------------------------------------------------------------------|----------------|---------------------|----------------------------------|-------------------|
| 1 Low birthweight (less than 2500 g) (ALL)                                                                 | 3              | 4316                | Risk Ratio (M-H, Random, 95% CI) | 0.84 [0.73, 0.95] |
| 2 Low birthweight (less than 2500 g): SUBGROUP ANALYSIS by gestational age at the start of supplementation | 3              | 4316                | Risk Ratio (M-H, Random, 95% CI) | 0.84 [0.73, 0.95] |
| 2.1 Early gestational age (less than 20 weeks of gestation or pre-pregnancy) at start of supplementation   | 2              | 1990                | Risk Ratio (M-H, Random, 95% CI) | 0.83 [0.73, 0.96] |
| 2.2 Late gestational age (20 weeks or more of gestation) at start of supplementation                       | 0              | 0                   | Risk Ratio (M-H, Random, 95% CI) | 0.0 [0.0, 0.0]    |
| 2.3 Unspecified or mixed gestational age at the start of supplementation                                   | 1              | 2326                | Risk Ratio (M-H, Random, 95% CI) | 0.85 [0.59, 1.22] |
| 3 Low birthweight (less than 2500 g): SUBGROUP ANALYSIS by anaemia status at the start of supplementation  | 3              | 4316                | Risk Ratio (M-H, Random, 95% CI) | 0.84 [0.73, 0.95] |
| 3.1 Anaemic at start of supplementation                                                                    | 0              | 0                   | Risk Ratio (M-H, Random, 95% CI) | 0.0 [0.0, 0.0]    |

| Outcome or subgroup title                                                                                                   | No. of studies | No. of participants | Statistical method                   | Effect size           |
|-----------------------------------------------------------------------------------------------------------------------------|----------------|---------------------|--------------------------------------|-----------------------|
| 3.2 Non-anaemic at start of supplementation                                                                                 | 1              | 727                 | Risk Ratio (M-H, Random, 95% CI)     | 1.21 [0.57, 2.54]     |
| 3.3 Unspecified or mixed anaemia status                                                                                     | 2              | 3589                | Risk Ratio (M-H, Random, 95% CI)     | 0.83 [0.72, 0.94]     |
| 4 Low birthweight (less than 2500 g):<br>SUBGROUP ANALYSIS by dose of iron                                                  | 3              | 4316                | Risk Ratio (M-H, Random, 95% CI)     | 0.84 [0.73, 0.95]     |
| 4.1 Low daily dose (30 mg elemental iron or less)                                                                           | 0              | 0                   | Risk Ratio (M-H, Random, 95% CI)     | 0.0 [0.0, 0.0]        |
| 4.2 Medium daily dose (31 to 59 mg elemental iron)                                                                          | 1              | 727                 | Risk Ratio (M-H, Random, 95% CI)     | 1.21 [0.57, 2.54]     |
| 4.3 Higher daily dose (60 mg elemental iron and above)                                                                      | 2              | 3589                | Risk Ratio (M-H, Random, 95% CI)     | 0.83 [0.72, 0.94]     |
| 5 Low birthweight (less than 2500 g):<br>SUBGROUP ANALYSIS by malarial status of setting                                    | 3              | 4316                | Risk Ratio (M-H, Random, 95% CI)     | 0.84 [0.73, 0.95]     |
| 5.1 Malarial setting                                                                                                        | 3              | 4316                | Risk Ratio (M-H, Random, 95% CI)     | 0.84 [0.73, 0.95]     |
| 5.2 Non-malarial setting                                                                                                    | 0              | 0                   | Risk Ratio (M-H, Random, 95% CI)     | 0.0 [0.0, 0.0]        |
| 6 Birthweight (g) (ALL)                                                                                                     | 3              | 4316                | Mean Difference (IV, Random, 95% CI) | 32.23 [0.86, 63.60]   |
| 7 Birthweight (g): SUBGROUP ANALYSIS<br>by gestational age at the start of<br>supplementation                               | 3              | 4316                | Mean Difference (IV, Random, 95% CI) | 32.23 [0.86, 63.60]   |
| 7.1 Early gestational age (less than 20 weeks<br>of gestation or pre-pregnancy) at start of<br>supplementation              | 2              | 1990                | Mean Difference (IV, Random, 95% CI) | 41.19 [-12.23, 94.60] |
| 7.2 Late gestational age (20 weeks or more<br>of gestation) at start of supplementation                                     | 0              | 0                   | Mean Difference (IV, Random, 95% CI) | 0.0 [0.0, 0.0]        |
| 7.3 Unspecified or mixed gestational age at<br>the start of supplementation                                                 | 1              | 2326                | Mean Difference (IV, Random, 95% CI) | 20.20 [-15.13, 55.53] |
| 8 Birthweight (g): SUBGROUP ANALYSIS<br>by anaemia status at the start of<br>supplementation                                | 3              | 4316                | Mean Difference (IV, Random, 95% CI) | 32.23 [0.86, 63.60]   |
| 8.1 Anaemic at start of supplementation                                                                                     | 0              | 0                   | Mean Difference (IV, Random, 95% CI) | 0.0 [0.0, 0.0]        |
| 8.2 Non-anaemic at start of supplementation                                                                                 | 1              | 727                 | Mean Difference (IV, Random, 95% CI) | 10.0 [-51.92, 71.92]  |
| 8.3 Unspecified or mixed anaemic status at<br>start of supplementation                                                      | 2              | 3589                | Mean Difference (IV, Random, 95% CI) | 39.61 [-3.90, 83.13]  |
| 9 Birthweight (g): SUBGROUP ANALYSIS<br>by dose of iron                                                                     | 3              | 4316                | Mean Difference (IV, Random, 95% CI) | 32.23 [0.86, 63.60]   |
| 9.1 Low daily dose (30 mg elemental iron or less)                                                                           | 0              | 0                   | Mean Difference (IV, Random, 95% CI) | 0.0 [0.0, 0.0]        |
| 9.2 Medium daily dose (31 to 59 mg elemental iron)                                                                          | 1              | 727                 | Mean Difference (IV, Random, 95% CI) | 10.0 [-51.92, 71.92]  |
| 9.3 Higher daily dose (60 mg elemental iron and above)                                                                      | 2              | 3589                | Mean Difference (IV, Random, 95% CI) | 39.61 [-3.90, 83.13]  |
| 10 Birthweight (g): SUBGROUP ANALYSIS<br>by malarial status of setting                                                      | 3              | 4316                | Mean Difference (IV, Random, 95% CI) | 32.23 [0.86, 63.60]   |
| 10.1 Malarial setting                                                                                                       | 3              | 4316                | Mean Difference (IV, Random, 95% CI) | 32.23 [0.86, 63.60]   |
| 10.2 Non-malarial setting                                                                                                   | 0              | 0                   | Mean Difference (IV, Random, 95% CI) | 0.0 [0.0, 0.0]        |
| 11 Premature birth (less than 37 weeks of<br>gestation) (ALL)                                                               | 3              | 4314                | Risk Ratio (M-H, Random, 95% CI)     | 0.97 [0.78, 1.20]     |
| 12 Premature birth (less 37 weeks of gestation):<br>SUBGROUP ANALYSIS by gestational age at<br>the start of supplementation | 3              | 4314                | Risk Ratio (M-H, Random, 95% CI)     | 0.97 [0.78, 1.20]     |
| 12.1 Early gestational age (less than 20<br>weeks of gestation or pre-pregnancy) at start of<br>supplementation             | 2              | 1988                | Risk Ratio (M-H, Random, 95% CI)     | 1.06 [0.87, 1.29]     |
| 12.2 Late gestational age (20 weeks or more<br>of gestation) at start of supplementation                                    | 0              | 0                   | Risk Ratio (M-H, Random, 95% CI)     | 0.0 [0.0, 0.0]        |

| Outcome or subgroup title                                                                                               | No. of studies | No. of participants | Statistical method               | Effect size       |
|-------------------------------------------------------------------------------------------------------------------------|----------------|---------------------|----------------------------------|-------------------|
| 12.3 Unspecified or mixed gestational age at the start of supplementation                                               | 1              | 2326                | Risk Ratio (M-H, Random, 95% CI) | 0.79 [0.57, 1.09] |
| 13 Premature birth (less 37 weeks of gestation): SUBGROUP ANALYSIS by anaemia status at the start of supplementation    | 3              | 4314                | Risk Ratio (M-H, Random, 95% CI) | 0.97 [0.78, 1.20] |
| 13.1 Anaemic at start of supplementation                                                                                | 0              | 0                   | Risk Ratio (M-H, Random, 95% CI) | 0.0 [0.0, 0.0]    |
| 13.2 Non-anaemic at start of supplementation                                                                            | 1              | 727                 | Risk Ratio (M-H, Random, 95% CI) | 1.26 [0.62, 2.56] |
| 13.3 Unspecified or mixed anaemic status at start of supplementation                                                    | 2              | 3587                | Risk Ratio (M-H, Random, 95% CI) | 0.93 [0.71, 1.22] |
| 14 Premature birth (less 37 weeks of gestation): SUBGROUP ANALYSIS by dose of iron                                      | 3              | 4314                | Risk Ratio (M-H, Random, 95% CI) | 0.97 [0.78, 1.20] |
| 14.1 Low daily dose (30 mg elemental iron or less)                                                                      | 0              | 0                   | Risk Ratio (M-H, Random, 95% CI) | 0.0 [0.0, 0.0]    |
| 14.2 Medium daily dose (31 to 59 mg elemental iron)                                                                     | 1              | 727                 | Risk Ratio (M-H, Random, 95% CI) | 1.26 [0.62, 2.56] |
| 14.3 Higher daily dose (60 mg elemental iron and above)                                                                 | 2              | 3587                | Risk Ratio (M-H, Random, 95% CI) | 0.93 [0.71, 1.22] |
| 15 Premature birth (less 37 weeks of gestation): SUBGROUP ANALYSIS by malarial status of setting                        | 3              | 4314                | Risk Ratio (M-H, Random, 95% CI) | 0.97 [0.78, 1.20] |
| 15.1 Malarial setting                                                                                                   | 3              | 4314                | Risk Ratio (M-H, Random, 95% CI) | 0.97 [0.78, 1.20] |
| 15.2 Non-malarial setting                                                                                               | 0              | 0                   | Risk Ratio (M-H, Random, 95% CI) | 0.0 [0.0, 0.0]    |
| 16 Neonatal death (within 28 days after delivery) (ALL)                                                                 | 3              | 4771                | Risk Ratio (M-H, Random, 95% CI) | 0.85 [0.63, 1.15] |
| 17 Neonatal death (within 28 days after delivery): SUBGROUP ANALYSIS by gestational age at the start of supplementation | 3              | 4771                | Risk Ratio (M-H, Random, 95% CI) | 0.85 [0.63, 1.15] |
| 17.1 Early gestational age (less than 20 weeks of gestation or pre-pregnancy) at start of supplementation               | 2              | 2276                | Risk Ratio (M-H, Random, 95% CI) | 0.92 [0.57, 1.49] |
| 17.2 Late gestational age (20 weeks or more of gestation) at start of supplementation                                   | 0              | 0                   | Risk Ratio (M-H, Random, 95% CI) | 0.0 [0.0, 0.0]    |
| 17.3 Unspecified or mixed gestational age at the start of supplementation                                               | 1              | 2495                | Risk Ratio (M-H, Random, 95% CI) | 0.81 [0.56, 1.19] |
| 18 Neonatal death (within 28 days after delivery) : SUBGROUP ANALYSIS by anaemia status at the start of supplementation | 3              | 4771                | Risk Ratio (M-H, Random, 95% CI) | 0.85 [0.63, 1.15] |
| 18.1 Anaemic at start of supplementation                                                                                | 0              | 0                   | Risk Ratio (M-H, Random, 95% CI) | 0.0 [0.0, 0.0]    |
| 18.2 Non-anaemic at start of supplementation                                                                            | 1              | 727                 | Risk Ratio (M-H, Random, 95% CI) | 0.48 [0.12, 1.91] |
| 18.3 Unspecified or mixed anaemic status at start of supplementation                                                    | 2              | 4044                | Risk Ratio (M-H, Random, 95% CI) | 0.88 [0.65, 1.19] |
| 19 Neonatal death (within 28 days after delivery): SUBGROUP ANALYSIS by dose of iron                                    | 3              | 4771                | Risk Ratio (M-H, Random, 95% CI) | 0.85 [0.63, 1.15] |
| 19.1 Low daily dose (30 mg elemental iron or less)                                                                      | 0              | 0                   | Risk Ratio (M-H, Random, 95% CI) | 0.0 [0.0, 0.0]    |
| 19.2 Medium daily dose (31 to 59 mg elemental iron)                                                                     | 1              | 727                 | Risk Ratio (M-H, Random, 95% CI) | 0.48 [0.12, 1.91] |
| 19.3 Higher daily dose (60 mg elemental iron and above)                                                                 | 2              | 4044                | Risk Ratio (M-H, Random, 95% CI) | 0.88 [0.65, 1.19] |
| 20 Neonatal death (within 28 days after delivery): SUBGROUP ANALYSIS by malarial status of setting                      | 3              | 4771                | Risk Ratio (M-H, Random, 95% CI) | 0.85 [0.63, 1.15] |
| 20.1 Malarial setting                                                                                                   | 3              | 4771                | Risk Ratio (M-H, Random, 95% CI) | 0.85 [0.63, 1.15] |
| 20.2 Non-malarial setting                                                                                               | 0              | 0                   | Risk Ratio (M-H, Random, 95% CI) | 0.0 [0.0, 0.0]    |
| 21 Congenital anomalies (ALL)                                                                                           | 1              | 1652                | Risk Ratio (M-H, Random, 95% CI) | 0.70 [0.35, 1.40] |

| Outcome or subgroup title                                                                                                                                  | No. of studies | No. of participants | Statistical method                   | Effect size       |
|------------------------------------------------------------------------------------------------------------------------------------------------------------|----------------|---------------------|--------------------------------------|-------------------|
| 22 Maternal anaemia at term (Hb less than 110 g/L at 37 weeks' gestation or more) (ALL)                                                                    | 2              | 303                 | Risk Ratio (M-H, Random, 95% CI)     | 0.34 [0.21, 0.55] |
| 23 Maternal anaemia at term (Hb less than 110 g/L at 37 weeks' gestation or more):<br>SUBGROUP ANALYSIS by gestational age at the start of supplementation | 2              | 303                 | Risk Ratio (M-H, Random, 95% CI)     | 0.34 [0.21, 0.55] |
| 23.1 Early gestational age (less than 20 weeks of gestation or pre-pregnancy) at start of supplementation                                                  | 0              | 0                   | Risk Ratio (M-H, Random, 95% CI)     | 0.0 [0.0, 0.0]    |
| 23.2 Late gestational age (20 weeks or more of gestation) at start of supplementation                                                                      | 2              | 303                 | Risk Ratio (M-H, Random, 95% CI)     | 0.34 [0.21, 0.55] |
| 23.3 Unspecified or mixed gestational age at start of supplementation                                                                                      | 0              | 0                   | Risk Ratio (M-H, Random, 95% CI)     | 0.0 [0.0, 0.0]    |
| 24 Maternal anaemia at term (Hb less than 110 g/L at 37 weeks' gestation or more):<br>SUBGROUP ANALYSIS by anaemia status at the start of supplementation  | 2              | 303                 | Risk Ratio (M-H, Random, 95% CI)     | 0.34 [0.21, 0.55] |
| 24.1 Anaemic at start of supplementation                                                                                                                   | 0              | 0                   | Risk Ratio (M-H, Random, 95% CI)     | 0.0 [0.0, 0.0]    |
| 24.2 Non-anaemic at start of supplementation                                                                                                               | 1              | 240                 | Risk Ratio (M-H, Random, 95% CI)     | 0.24 [0.09, 0.61] |
| 24.3 Unspecified or mixed anaemic status at start of supplementation                                                                                       | 1              | 63                  | Risk Ratio (M-H, Random, 95% CI)     | 0.39 [0.23, 0.67] |
| 25 Maternal anaemia at term (Hb less than 110 g/L at 37 weeks' gestation or more):<br>SUBGROUP ANALYSIS by dose of iron                                    | 2              | 303                 | Risk Ratio (M-H, Random, 95% CI)     | 0.34 [0.21, 0.55] |
| 25.1 Low daily dose (30 mg elemental iron or less)                                                                                                         | 0              | 0                   | Risk Ratio (M-H, Random, 95% CI)     | 0.0 [0.0, 0.0]    |
| 25.2 Medium daily dose (31 to 59 mg elemental iron)                                                                                                        | 0              | 0                   | Risk Ratio (M-H, Random, 95% CI)     | 0.0 [0.0, 0.0]    |
| 25.3 Higher daily dose (60 mg elemental iron and above)                                                                                                    | 2              | 303                 | Risk Ratio (M-H, Random, 95% CI)     | 0.34 [0.21, 0.55] |
| 26 Maternal anaemia at term (Hb less than 110 g/L at 37 weeks' gestation or more):<br>SUBGROUP ANALYSIS by malarial status of setting                      | 2              | 303                 | Risk Ratio (M-H, Random, 95% CI)     | 0.34 [0.21, 0.55] |
| 26.1 Malarial setting                                                                                                                                      | 1              | 63                  | Risk Ratio (M-H, Random, 95% CI)     | 0.39 [0.23, 0.67] |
| 26.2 Non-malarial setting                                                                                                                                  | 1              | 240                 | Risk Ratio (M-H, Random, 95% CI)     | 0.24 [0.09, 0.61] |
| 27 Maternal iron deficiency at term (as defined by trialists, based on any indicator of iron status at 37 weeks' gestation or more) (ALL)                  | 0              | 0                   | Risk Ratio (M-H, Random, 95% CI)     | 0.0 [0.0, 0.0]    |
| 28 Maternal iron-deficiency anaemia at term (Hb less than 110 g/L and at least one additional laboratory indicators at 37 weeks' gestation or more) (ALL)  | 1              | 727                 | Risk Ratio (M-H, Random, 95% CI)     | 0.0 [0.0, 0.0]    |
| 29 Maternal death (death while pregnant or within 42 days of termination of pregnancy) (ALL)                                                               | 0              | 0                   | Risk Ratio (M-H, Random, 95% CI)     | 0.0 [0.0, 0.0]    |
| 30 Side effects (any reported throughout the intervention period) (ALL)                                                                                    | 1              | 727                 | Risk Ratio (M-H, Random, 95% CI)     | 1.10 [0.55, 2.23] |
| 31 Maternal severe anaemia at any time during second and third trimester (Hb less than 70 g/L) (ALL)                                                       | 3              | 1047                | Risk Ratio (M-H, Random, 95% CI)     | 0.06 [0.01, 0.47] |
| 32 Maternal clinical malaria                                                                                                                               | 0              | 0                   | Risk Ratio (M-H, Random, 95% CI)     | 0.0 [0.0, 0.0]    |
| 33 Infection during pregnancy (including urinary tract infections) (ALL)                                                                                   | 1              | 727                 | Risk Ratio (M-H, Random, 95% CI)     | 1.21 [0.33, 4.46] |
| 34 Very low birthweight (less than 1500 g) (ALL)                                                                                                           | 2              | 1990                | Risk Ratio (M-H, Random, 95% CI)     | 0.76 [0.28, 2.01] |
| 35 Very premature birth (less than 34 weeks' gestation) (ALL)                                                                                              | 2              | 3053                | Risk Ratio (M-H, Random, 95% CI)     | 0.58 [0.30, 1.12] |
| 36 Infant Hb concentration in the first 6 months (in g/L, counting the last reported measure after birth within this period) (ALL)                         | 0              | 0                   | Mean Difference (IV, Random, 95% CI) | 0.0 [0.0, 0.0]    |
| 37 Infant serum ferritin concentration in the first 6 months (in µg/L, counting the last                                                                   | 0              | 0                   | Mean Difference (IV, Random, 95% CI) | 0.0 [0.0, 0.0]    |



| Outcome or subgroup title                                                                                                                                         | No. of studies | No. of participants | Statistical method                   | Effect size         |
|-------------------------------------------------------------------------------------------------------------------------------------------------------------------|----------------|---------------------|--------------------------------------|---------------------|
| reported measure after birth within this period)<br>(ALL)                                                                                                         |                |                     |                                      |                     |
| 38 Admission to special care unit (ALL)                                                                                                                           | 0              | 0                   | Risk Ratio (M-H, Random, 95% CI)     | 0.0 [0.0, 0.0]      |
| 39 Maternal anaemia at or near term (Hb less than 110 g/L at 34 weeks' gestation or more) (ALL)                                                                   | 2              | 303                 | Risk Ratio (M-H, Random, 95% CI)     | 0.34 [0.21, 0.55]   |
| 40 Maternal iron deficiency at or near term (as defined by trialists, based on any indicator of iron status at 34 weeks' gestation or more) (ALL)                 | 0              | 0                   | Risk Ratio (M-H, Random, 95% CI)     | 0.0 [0.0, 0.0]      |
| 41 Maternal iron-deficiency anaemia at or near term (Hb less than 110 g/L and at least one additional laboratory indicators at 34 weeks' gestation or more) (ALL) | 1              | 727                 | Risk Ratio (M-H, Random, 95% CI)     | 0.0 [0.0, 0.0]      |
| 42 Maternal Hb concentration at or near term (in g/L at 34 weeks' gestation or more) (ALL)                                                                        | 2              | 771                 | Mean Difference (IV, Random, 95% CI) | 12.44 [0.95, 23.93] |
| 43 Maternal Hb concentration within 6 wk postpartum (in g/L) (ALL)                                                                                                | 1              | 297                 | Mean Difference (IV, Random, 95% CI) | 9.20 [5.78, 12.62]  |
| 44 Maternal high haemoglobin concentrations during second or third trimester (Hb more than 130 g/L) (ALL)                                                         | 2              | 1042                | Risk Ratio (M-H, Random, 95% CI)     | 4.33 [2.26, 8.30]   |
| 45 Maternal high haemoglobin concentrations at or near term (Hb more than 130 g/L at 34 weeks' gestation or more) (ALL)                                           | 2              | 967                 | Risk Ratio (M-H, Random, 95% CI)     | 1.87 [0.32, 10.84]  |
| 46 Moderate anaemia at postpartum (Hb more than 80 g/L and less than 110 g/L) (ALL)                                                                               | 1              | 353                 | Risk Ratio (M-H, Random, 95% CI)     | 0.38 [0.18, 0.81]   |
| 47 Maternal severe anaemia at or near term (Hb less than 70 g/L at 34 weeks' gestation or more) (ALL)                                                             | 2              | 773                 | Risk Ratio (M-H, Random, 95% CI)     | 0.0 [0.0, 0.0]      |
| 48 Severe anaemia at postpartum (Hb less than 80 g/L) (ALL)                                                                                                       | 2              | 386                 | Risk Ratio (M-H, Random, 95% CI)     | 0.08 [0.00, 1.33]   |
| 49 Puerperal infection (ALL)                                                                                                                                      | 1              | 727                 | Risk Ratio (M-H, Random, 95% CI)     | 0.96 [0.20, 4.75]   |
| 50 Antepartum haemorrhage (ALL)                                                                                                                                   | 1              | 727                 | Risk Ratio (M-H, Random, 95% CI)     | 1.35 [0.43, 4.22]   |
| 51 Postpartum haemorrhage (ALL)                                                                                                                                   | 1              | 727                 | Risk Ratio (M-H, Random, 95% CI)     | 3.38 [0.71, 16.15]  |
| 52 Transfusion provided (ALL)                                                                                                                                     | 1              | 727                 | Risk Ratio (M-H, Random, 95% CI)     | 2.89 [0.12, 70.83]  |
| 53 Diarrhoea (ALL)                                                                                                                                                | 1              | 727                 | Risk Ratio (M-H, Random, 95% CI)     | 0.55 [0.16, 1.87]   |
| 54 Constipation (ALL)                                                                                                                                             | 1              | 727                 | Risk Ratio (M-H, Random, 95% CI)     | 1.10 [0.55, 2.23]   |
| 55 Nausea (ALL)                                                                                                                                                   | 1              | 727                 | Risk Ratio (M-H, Random, 95% CI)     | 0.96 [0.47, 1.99]   |
| 56 Heartburn (ALL)                                                                                                                                                | 1              | 727                 | Risk Ratio (M-H, Random, 95% CI)     | 1.65 [0.66, 4.15]   |
| 57 Vomiting (ALL)                                                                                                                                                 | 0              | 0                   | Risk Ratio (M-H, Random, 95% CI)     | 0.0 [0.0, 0.0]      |
| 58 Maternal wellbeing/satisfaction (ALL)                                                                                                                          | 0              | 0                   | Risk Ratio (M-H, Random, 95% CI)     | 0.0 [0.0, 0.0]      |
| 59 Placental abruption (ALL)                                                                                                                                      | 1              | 727                 | Risk Ratio (M-H, Random, 95% CI)     | 0.96 [0.24, 3.83]   |
| 60 Premature rupture of membranes (ALL)                                                                                                                           | 1              | 727                 | Risk Ratio (M-H, Random, 95% CI)     | 0.99 [0.74, 1.34]   |
| 61 Pre-eclampsia (ALL)                                                                                                                                            | 1              | 727                 | Risk Ratio (M-H, Random, 95% CI)     | 3.22 [0.89, 11.59]  |

## Comparison 6

## Supplementation with iron+other vitamins and minerals supplementation versus same other vitamins and minerals (without iron) supplementation

| Outcome or subgroup title                                                                                                                                         | No. of studies | No. of participants | Statistical method                   | Effect size          |
|-------------------------------------------------------------------------------------------------------------------------------------------------------------------|----------------|---------------------|--------------------------------------|----------------------|
| 1 Low birthweight (less than 2500 g) (ALL)                                                                                                                        | 1              | 334                 | Risk Ratio (M-H, Random, 95% CI)     | 0.51 [0.22, 1.15]    |
| 2 Birthweight (g) (ALL)                                                                                                                                           | 2              | 1116                | Mean Difference (IV, Random, 95% CI) | 55.70 [3.42, 107.97] |
| 3 Premature birth (less than 37 weeks of gestation) (ALL)                                                                                                         | 2              | 1127                | Risk Ratio (M-H, Random, 95% CI)     | 0.66 [0.41, 1.04]    |
| 4 Neonatal death (within 28 days after delivery) (ALL)                                                                                                            | 0              | 0                   | Risk Ratio (M-H, Random, 95% CI)     | 0.0 [0.0, 0.0]       |
| 5 Congenital anomalies (ALL)                                                                                                                                      | 0              | 0                   | Risk Ratio (M-H, Random, 95% CI)     | 0.0 [0.0, 0.0]       |
| 6 Maternal anaemia at term (Hb less than 110 g/L at 37 weeks' gestation or more) (ALL)                                                                            | 0              | 0                   | Risk Ratio (M-H, Random, 95% CI)     | 0.0 [0.0, 0.0]       |
| 7 Maternal iron deficiency at term (as defined by trialists, based on any indicator of iron status at 37 weeks' gestation or more) (ALL)                          | 0              | 0                   | Risk Ratio (M-H, Random, 95% CI)     | 0.0 [0.0, 0.0]       |
| 8 Maternal iron-deficiency anaemia at term (Hb less than 110 g/L and at least one additional laboratory indicators at 37 weeks' gestation or more) (ALL)          | 0              | 0                   | Risk Ratio (M-H, Random, 95% CI)     | 0.0 [0.0, 0.0]       |
| 9 Maternal death (death while pregnant or within 42 days of termination of pregnancy) (ALL)                                                                       | 0              | 0                   | Risk Ratio (M-H, Random, 95% CI)     | 0.0 [0.0, 0.0]       |
| 10 Side effects (any reported throughout the intervention period) (ALL)                                                                                           | 1              | 188                 | Risk Ratio (M-H, Random, 95% CI)     | 0.77 [0.55, 1.07]    |
| 11 Maternal severe anaemia at any time during second and third trimester (Hb less than 70 g/L) (ALL)                                                              | 0              | 0                   | Risk Ratio (M-H, Random, 95% CI)     | 0.0 [0.0, 0.0]       |
| 12 Maternal clinical malaria                                                                                                                                      | 0              | 0                   | Risk Ratio (M-H, Random, 95% CI)     | 0.0 [0.0, 0.0]       |
| 13 Infection during pregnancy (including urinary tract infections) (ALL)                                                                                          | 0              | 0                   | Risk Ratio (M-H, Random, 95% CI)     | 0.0 [0.0, 0.0]       |
| 14 Very low birthweight (less than 1500 g) (ALL)                                                                                                                  | 0              | 0                   | Risk Ratio (M-H, Random, 95% CI)     | 0.0 [0.0, 0.0]       |
| 15 Very premature birth (less than 34 weeks' gestation) (ALL)                                                                                                     | 0              | 0                   | Risk Ratio (M-H, Random, 95% CI)     | 0.0 [0.0, 0.0]       |
| 16 Infant Hb concentration in the first 6 months (in g/L, counting the last reported measure after birth within this period) (ALL)                                | 0              | 0                   | Mean Difference (IV, Random, 95% CI) | 0.0 [0.0, 0.0]       |
| 17 Infant serum ferritin concentration in the first 6 months (in µg/L, counting the last reported measure after birth within this period) (ALL)                   | 0              | 0                   | Mean Difference (IV, Random, 95% CI) | 0.0 [0.0, 0.0]       |
| 18 Admission to special care unit (ALL)                                                                                                                           | 0              | 0                   | Risk Ratio (M-H, Random, 95% CI)     | 0.0 [0.0, 0.0]       |
| 19 Maternal anaemia at or near term (Hb less than 110 g/L at 34 weeks' gestation or more) (ALL)                                                                   | 0              | 0                   | Risk Ratio (M-H, Random, 95% CI)     | 0.0 [0.0, 0.0]       |
| 20 Maternal iron deficiency at or near term (as defined by trialists, based on any indicator of iron status at 34 weeks' gestation or more) (ALL)                 | 0              | 0                   | Risk Ratio (M-H, Random, 95% CI)     | 0.0 [0.0, 0.0]       |
| 21 Maternal iron-deficiency anaemia at or near term (Hb less than 110 g/L and at least one additional laboratory indicators at 34 weeks' gestation or more) (ALL) | 0              | 0                   | Risk Ratio (M-H, Random, 95% CI)     | 0.0 [0.0, 0.0]       |
| 22 Maternal Hb concentration at or near term (in g/L at 34 weeks' gestation or more) (ALL)                                                                        | 2              | 809                 | Mean Difference (IV, Random, 95% CI) | 10.85 [7.29, 14.42]  |
| 23 Maternal Hb concentration within 6 wk postpartum (in g/L) (ALL)                                                                                                | 1              | 27                  | Mean Difference (IV, Random, 95% CI) | 14.0 [3.56, 24.44]   |
| 24 Maternal high haemoglobin concentrations during second or third trimester (Hb more than 130 g/L) (ALL)                                                         | 0              | 0                   | Risk Ratio (M-H, Random, 95% CI)     | 0.0 [0.0, 0.0]       |

| Outcome or subgroup title                                                                                               | No. of studies | No. of participants | Statistical method               | Effect size       |
|-------------------------------------------------------------------------------------------------------------------------|----------------|---------------------|----------------------------------|-------------------|
| 25 Maternal high haemoglobin concentrations at or near term (Hb more than 130 g/L at 34 weeks' gestation or more) (ALL) | 0              | 0                   | Risk Ratio (M-H, Random, 95% CI) | 0.0 [0.0, 0.0]    |
| 26 Moderate anaemia at postpartum (Hb more than 80 g/L and less than 110 g/L) (ALL)                                     | 0              | 0                   | Risk Ratio (M-H, Random, 95% CI) | 0.0 [0.0, 0.0]    |
| 27 Maternal severe anaemia at or near term (Hb less than 70 g/L at 34 weeks' gestation or more) (ALL)                   | 0              | 0                   | Risk Ratio (M-H, Random, 95% CI) | 0.0 [0.0, 0.0]    |
| 28 Severe anaemia at postpartum (Hb less than 80 g/L) (ALL)                                                             | 0              | 0                   | Risk Ratio (M-H, Random, 95% CI) | 0.0 [0.0, 0.0]    |
| 29 Puerperal infection (ALL)                                                                                            | 0              | 0                   | Risk Ratio (M-H, Random, 95% CI) | 0.0 [0.0, 0.0]    |
| 30 Antepartum haemorrhage (ALL)                                                                                         | 0              | 0                   | Risk Ratio (M-H, Random, 95% CI) | 0.0 [0.0, 0.0]    |
| 31 Postpartum haemorrhage (ALL)                                                                                         | 0              | 0                   | Risk Ratio (M-H, Random, 95% CI) | 0.0 [0.0, 0.0]    |
| 32 Transfusion provided (ALL)                                                                                           | 0              | 0                   | Risk Ratio (M-H, Random, 95% CI) | 0.0 [0.0, 0.0]    |
| 33 Constipation (ALL)                                                                                                   | 1              | 188                 | Risk Ratio (M-H, Random, 95% CI) | 0.77 [0.55, 1.07] |
| 34 Nausea (ALL)                                                                                                         | 0              | 0                   | Risk Ratio (M-H, Random, 95% CI) | 0.0 [0.0, 0.0]    |
| 35 Heartburn (ALL)                                                                                                      | 1              | 188                 | Risk Ratio (M-H, Random, 95% CI) | 1.49 [0.95, 2.34] |
| 36 Vomiting (ALL)                                                                                                       | 1              | 188                 | Risk Ratio (M-H, Random, 95% CI) | 1.13 [0.58, 2.20] |
| 37 Diarrhoea (ALL)                                                                                                      | 1              | 188                 | Risk Ratio (M-H, Random, 95% CI) | 0.53 [0.29, 0.96] |
| 38 Maternal wellbeing/satisfaction (ALL)                                                                                | 0              | 0                   | Risk Ratio (M-H, Random, 95% CI) | 0.0 [0.0, 0.0]    |
| 39 Placental abruption (ALL)                                                                                            | 1              | 782                 | Risk Ratio (M-H, Random, 95% CI) | 1.81 [0.46, 7.20] |
| 40 Premature rupture of membranes (ALL)                                                                                 | 1              | 782                 | Risk Ratio (M-H, Random, 95% CI) | 0.79 [0.44, 1.41] |
| 41 Pre-eclampsia (ALL)                                                                                                  | 1              | 782                 | Risk Ratio (M-H, Random, 95% CI) | 1.45 [0.67, 3.16] |

**Analysis 1.1. Comparison 1 Any supplements containing iron versus same supplements without iron or no treatment/placebo (no iron or placebo), Outcome 1 Low birthweight (less than 2500 g) (ALL)**

Review: Daily oral iron supplementation during pregnancy

Comparison: 1 Any supplements containing iron versus same supplements without iron or no treatment/placebo (no iron or placebo)

Outcome: 1 Low birthweight (less than 2500 g) (ALL)

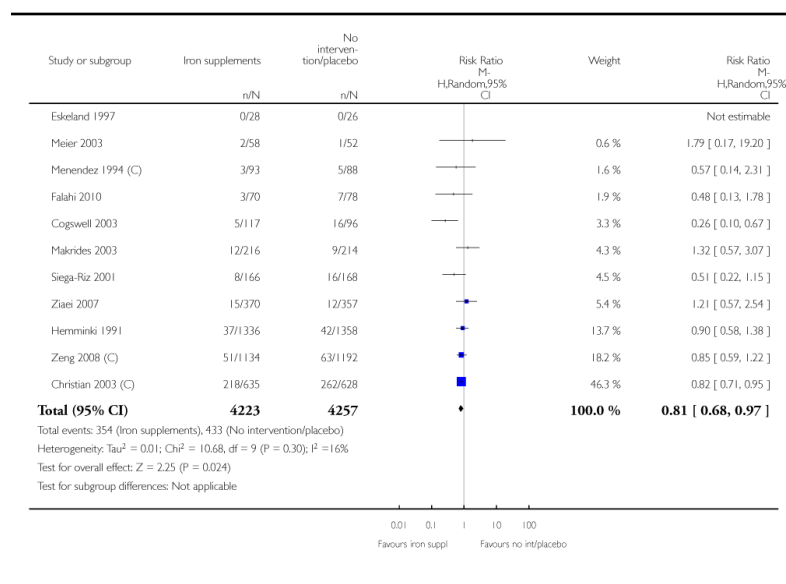

**Analysis 1.2. Comparison 1 Any supplements containing iron versus same supplements without iron or no treatment/placebo (no iron or placebo), Outcome 2 Low birthweight (less than 2500 g): SUBGROUP ANALYSIS by gestational age at the start of supplementation.**

Review: Daily oral iron supplementation during pregnancy

Comparison: 1 Any supplements containing iron versus same supplements without iron or no treatment/placebo (no iron or placebo)

Outcome: 2 Low birthweight (less than 2500 g): SUBGROUP ANALYSIS by gestational age at the start of supplementation

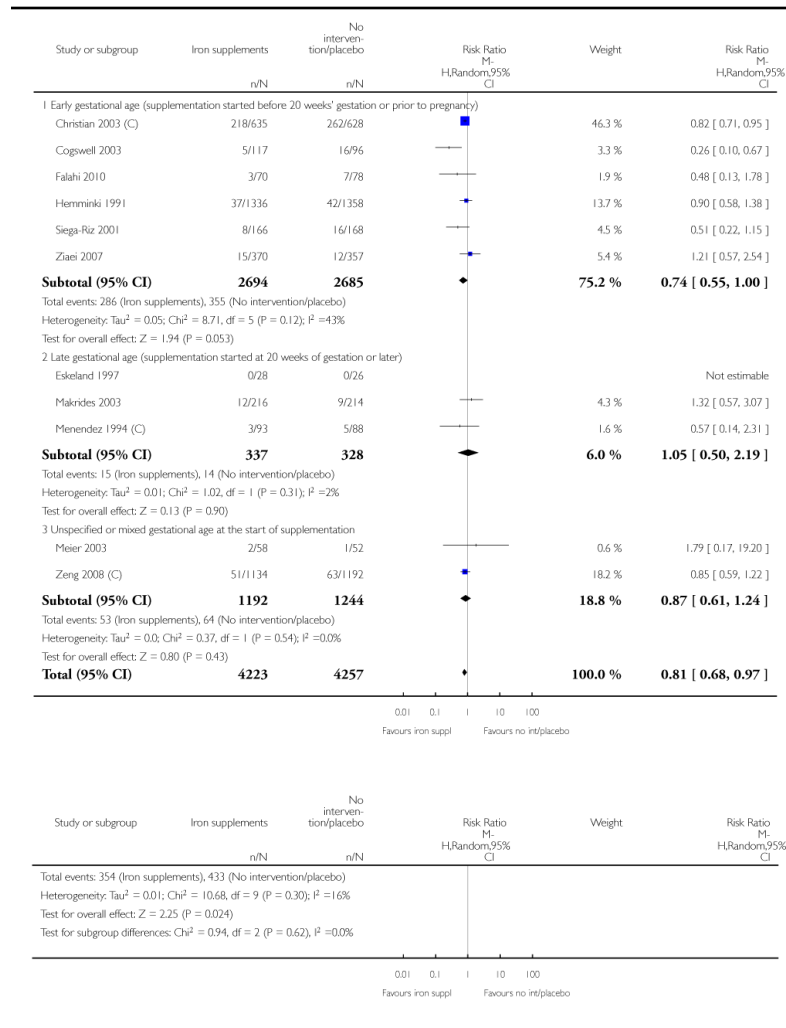

**Analysis 1.3. Comparison 1 Any supplements containing iron versus same supplements without iron or no treatment/placebo (no iron or placebo), Outcome 3 Low birthweight (less than 2500 g): SUBGROUP ANALYSIS by anaemia status at the start of supplementation.**

Review: Daily oral iron supplementation during pregnancy

Comparison: 1 Any supplements containing iron versus same supplements without iron or no treatment/placebo (no iron or placebo)

Outcome: 3 Low birthweight (less than 2500 g): SUBGROUP ANALYSIS by anaemia status at the start of supplementation

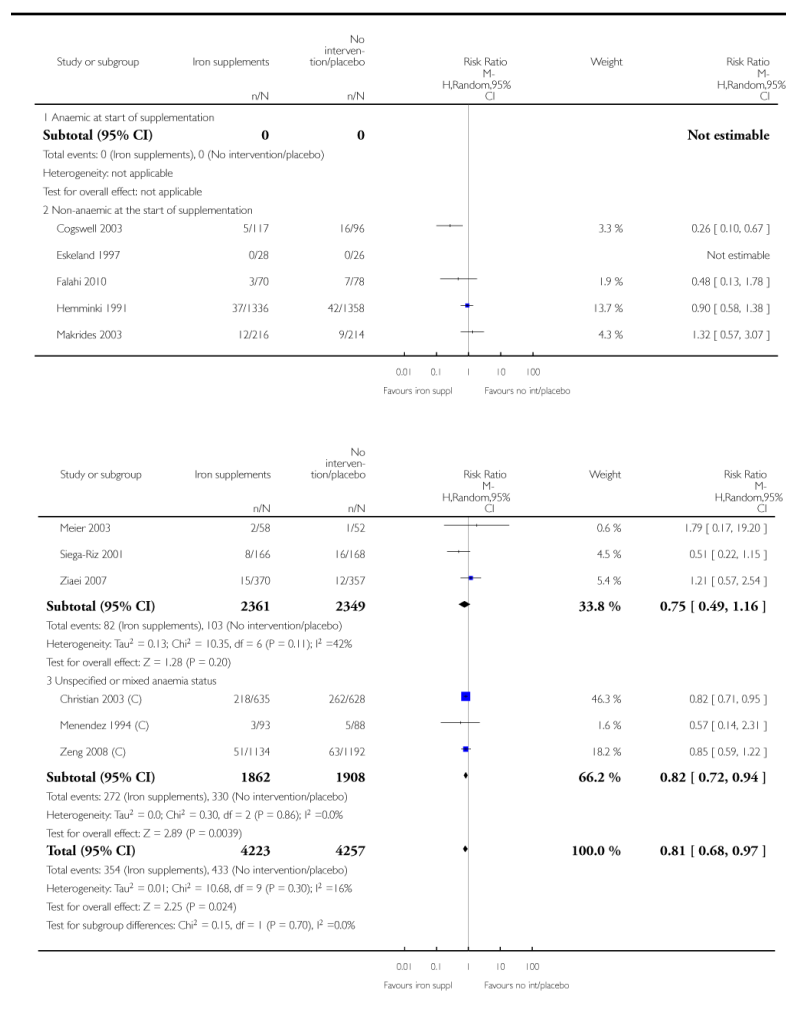

**Analysis 1.4. Comparison 1 Any supplements containing iron versus same supplements without iron or no treatment/placebo (no iron or placebo), Outcome 4 Low birthweight (less than 2500 g): SUBGROUP ANALYSIS by dose of iron.**

Review: Daily oral iron supplementation during pregnancy

Comparison: 1 Any supplements containing iron versus same supplements without iron or no treatment/placebo (no iron or placebo)

Outcome: 4 Low birthweight (less than 2500 g): SUBGROUP ANALYSIS by dose of iron

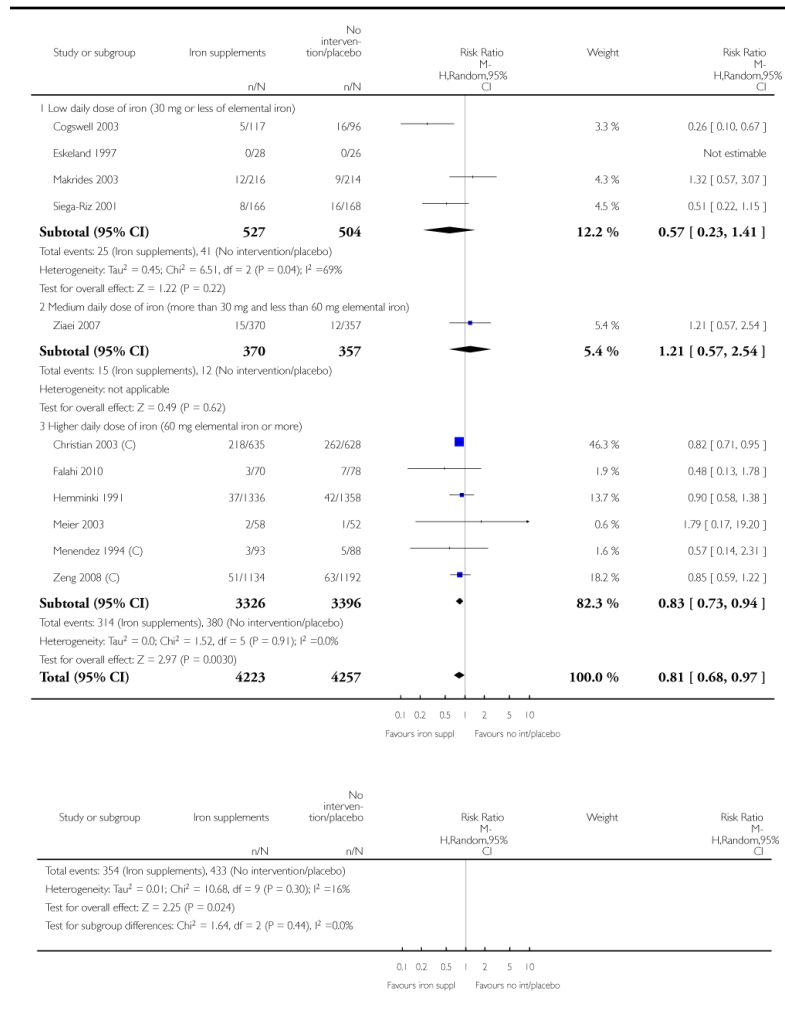

**Analysis 1.5. Comparison 1 Any supplements containing iron versus same supplements without iron or no treatment/placebo (no iron or placebo), Outcome 5 Low birthweight (less than 2500 g): SUBGROUP ANALYSIS by malarial status of setting.**

Review: Daily oral iron supplementation during pregnancy

Comparison: 1 Any supplements containing iron versus same supplements without iron or no treatment/placebo (no iron or placebo)

Outcome: 5 Low birthweight (less than 2500 g): SUBGROUP ANALYSIS by malarial status of setting

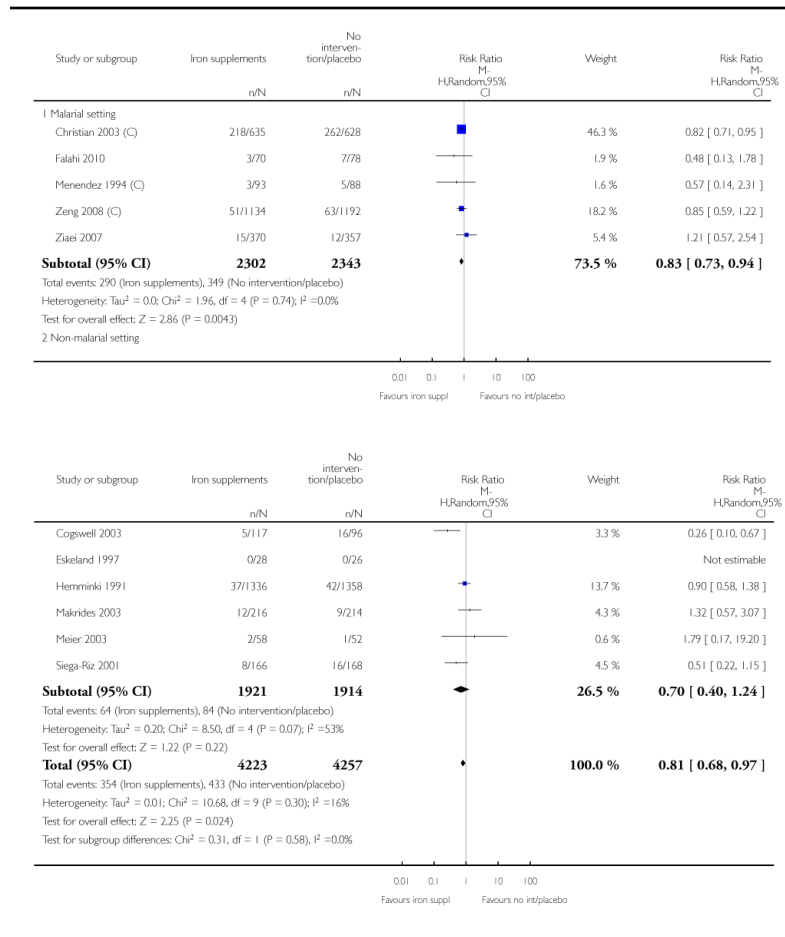

**Analysis 1.6. Comparison 1 Any supplements containing iron versus same supplements without iron or no treatment/placebo (no iron or placebo), Outcome 6 Birthweight (g) (ALL)**

Review: Daily oral iron supplementation during pregnancy

Comparison: 1 Any supplements containing iron versus same supplements without iron or no treatment/placebo (no iron or placebo)

Outcome: 6 Birthweight (g) (ALL)



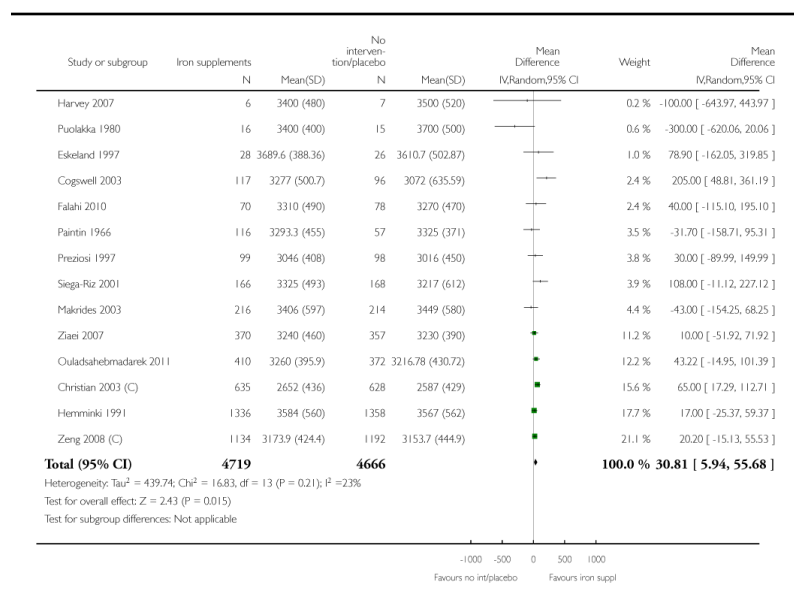

**Analysis 1.7. Comparison 1 Any supplements containing iron versus same supplements without iron or no treatment/placebo (no iron or placebo), Outcome 7 Birthweight (g): SUBGROUP ANALYSIS by gestational age at the start of supplementation.**

Review: Daily oral iron supplementation during pregnancy

Comparison: 1 Any supplements containing iron versus same supplements without iron or no treatment/placebo (no iron or placebo)

Outcome: 7 Birthweight (g): SUBGROUP ANALYSIS by gestational age at the start of supplementation

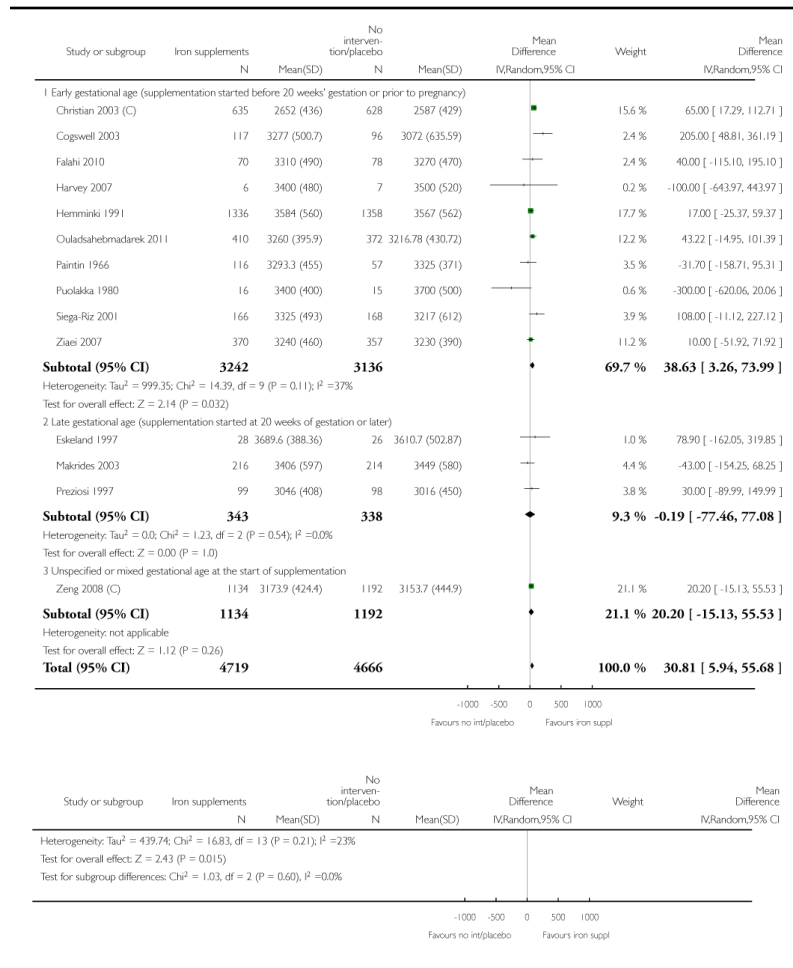

**Analysis 1.8. Comparison 1 Any supplements containing iron versus same supplements without iron or no treatment/placebo (no iron or placebo), Outcome 8 Birthweight (g): SUBGROUP ANALYSIS by anaemia status at the start of supplementation.**

Review: Daily oral iron supplementation during pregnancy

Comparison: 1 Any supplements containing iron versus same supplements without iron or no treatment/placebo (no iron or placebo)

Outcome: 8 Birthweight (g): SUBGROUP ANALYSIS by anaemia status at the start of supplementation

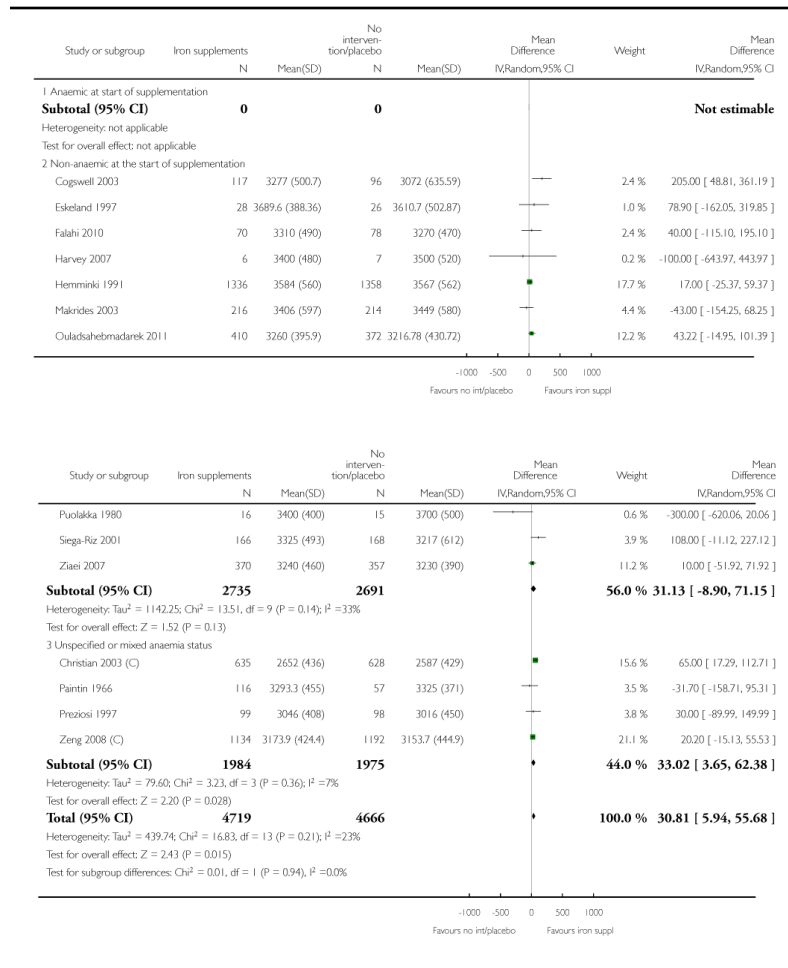

**Analysis 1.9. Comparison 1 Any supplements containing iron versus same supplements without iron or no treatment/placebo (no iron or placebo), Outcome 9 Birthweight (g): SUBGROUP ANALYSIS by dose of iron.**

Review: Daily oral iron supplementation during pregnancy

Comparison: 1 Any supplements containing iron versus same supplements without iron or no treatment/placebo (no iron or placebo)

Outcome: 9 Birthweight (g): SUBGROUP ANALYSIS by dose of iron

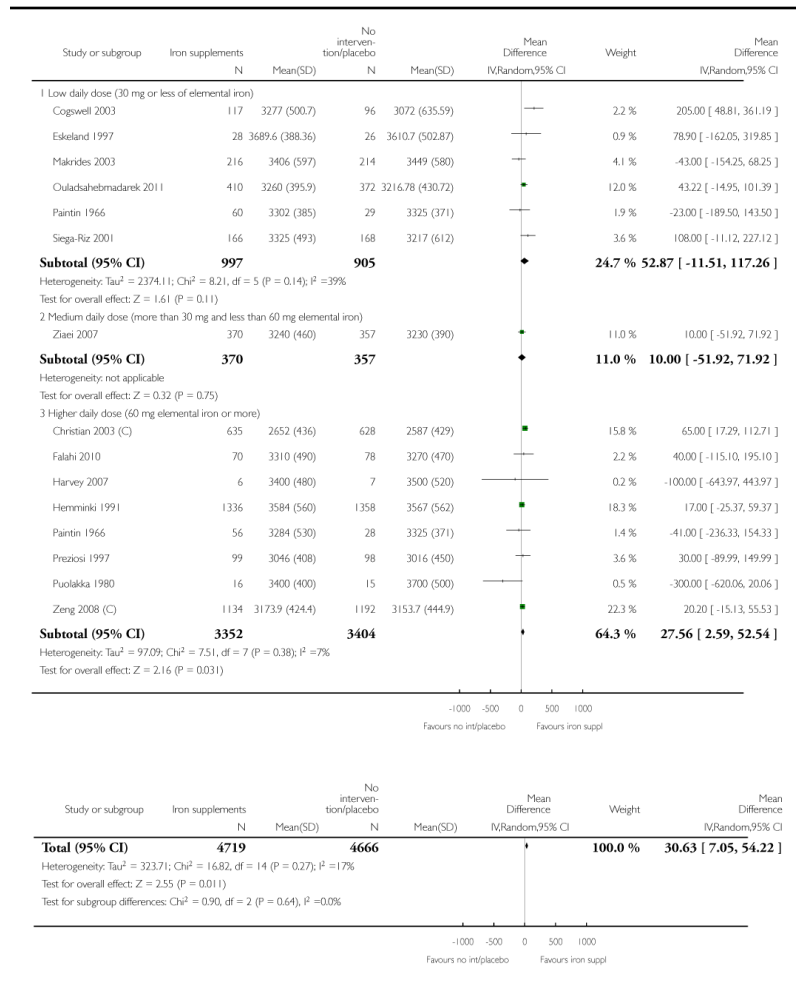

### Analysis 1.10. Comparison 1 Any supplements containing iron versus same supplements without iron or no treatment/placebo (no iron or placebo), Outcome 10 Birthweight (g): SUBGROUP ANALYSIS by malarial status of setting.

Review: Daily oral iron supplementation during pregnancy

Comparison: 1 Any supplements containing iron versus same supplements without iron or no treatment/placebo (no iron or placebo)

Outcome: 10 Birthweight (g): SUBGROUP ANALYSIS by malarial status of setting

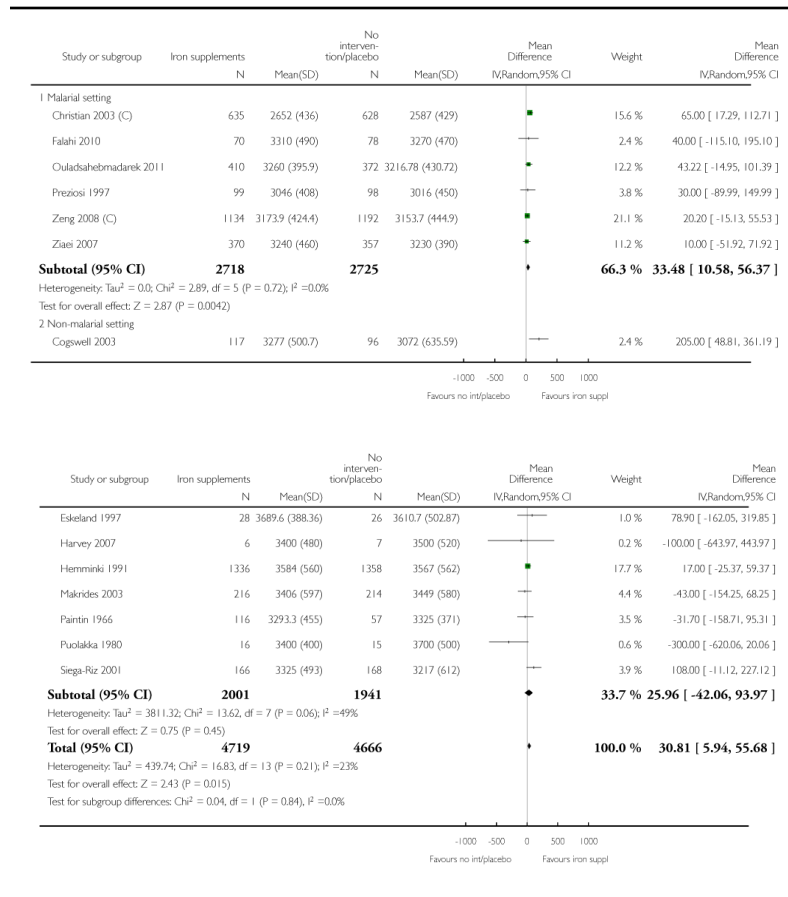

### Analysis 1.11. Comparison 1 Any supplements containing iron versus same supplements without iron or no treatment/placebo (no iron or placebo), Outcome 11 Premature birth (less than 37 weeks of gestation) (ALL)

Review: Daily oral iron supplementation during pregnancy

Comparison: 1 Any supplements containing iron versus same supplements without iron or no treatment/placebo (no iron or placebo)

Outcome: 11 Premature birth (less than 37 weeks of gestation) (ALL)

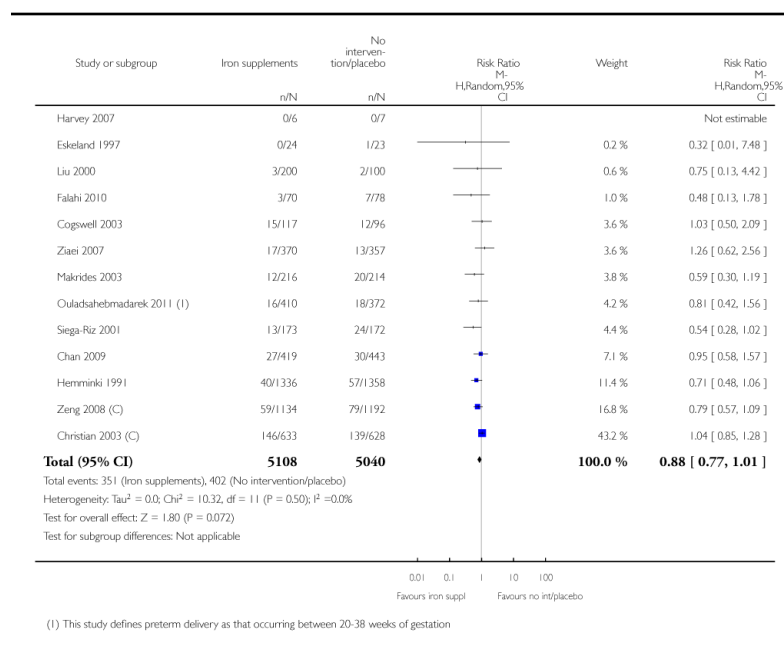

**Analysis 1.12. Comparison 1 Any supplements containing iron versus same supplements without iron or no treatment/placebo (no iron or placebo), Outcome 12 Premature birth (less than 37 weeks of gestation): SUBGROUP ANALYSIS by gestational age at the start of supplementation.**

Review: Daily oral iron supplementation during pregnancy

Comparison: 1 Any supplements containing iron versus same supplements without iron or no treatment/placebo (no iron or placebo)

Outcome: 12 Premature birth (less than 37 weeks of gestation): SUBGROUP ANALYSIS by gestational age at the start of supplementation

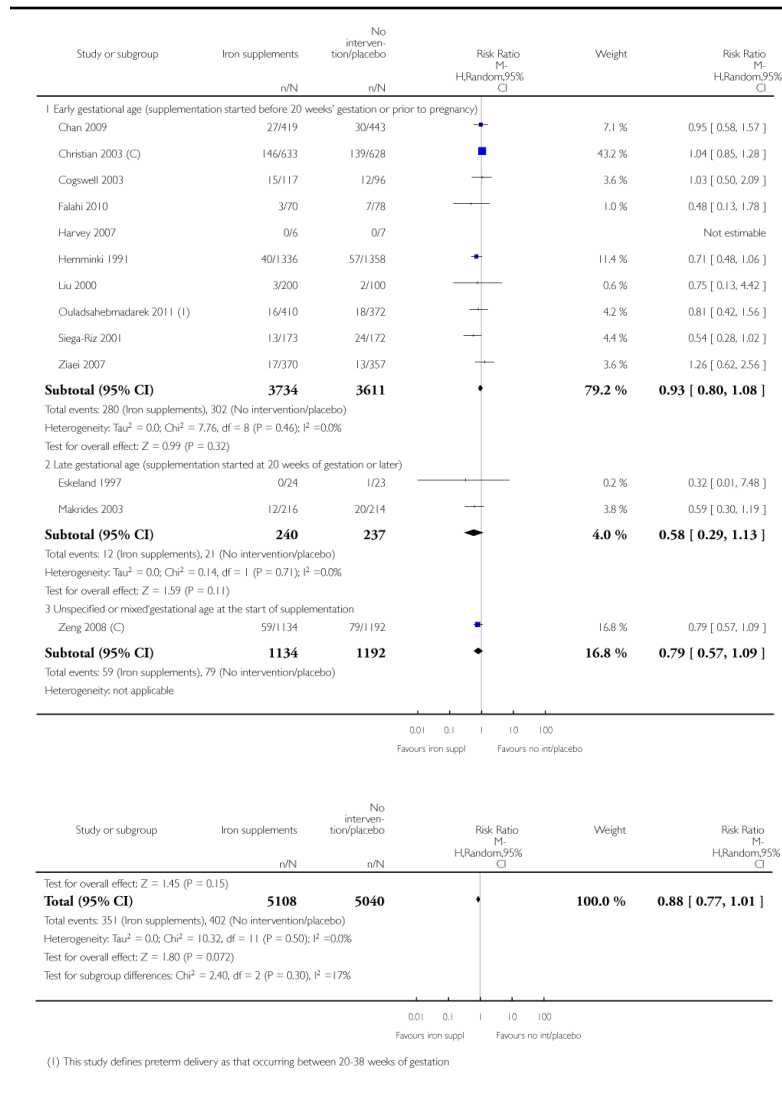

**Analysis 1.13. Comparison 1 Any supplements containing iron versus same supplements without iron or no treatment/placebo (no iron or placebo), Outcome 13 Premature birth (less than 37 weeks of gestation): SUBGROUP ANALYSIS by anaemia status at the start of supplementation.**

Review: Daily oral iron supplementation during pregnancy

Comparison: 1 Any supplements containing iron versus same supplements without iron or no treatment/placebo (no iron or placebo)

Outcome: 13 Premature birth (less than 37 weeks of gestation): SUBGROUP ANALYSIS by anaemia status at the start of supplementation

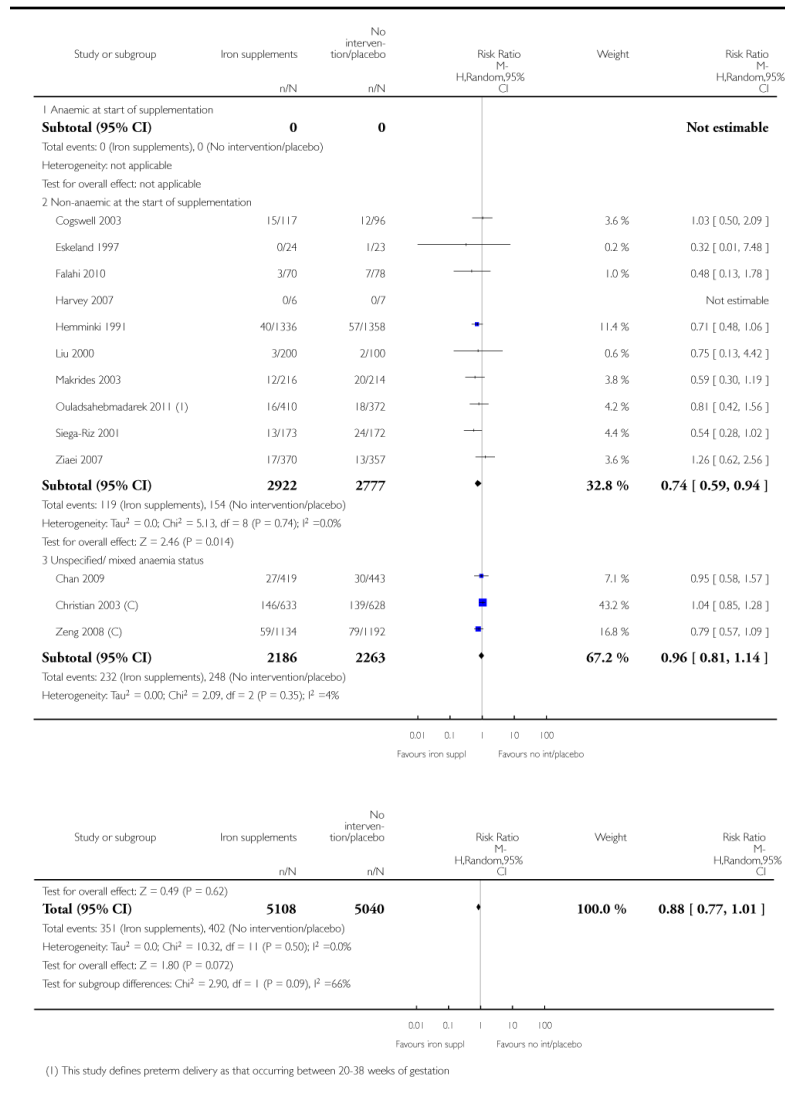

**Analysis 1.14. Comparison 1 Any supplements containing iron versus same supplements without iron or no treatment/placebo (no iron or placebo), Outcome 14 Premature birth (less than 37 weeks of gestation): SUBGROUP ANALYSIS by dose of iron.**

Review: Daily oral iron supplementation during pregnancy

Comparison: 1 Any supplements containing iron versus same supplements without iron or no treatment/placebo (no iron or placebo)



Outcome: 14 Premature birth (less than 37 weeks of gestation): SUBGROUP ANALYSIS  
by dose of iron

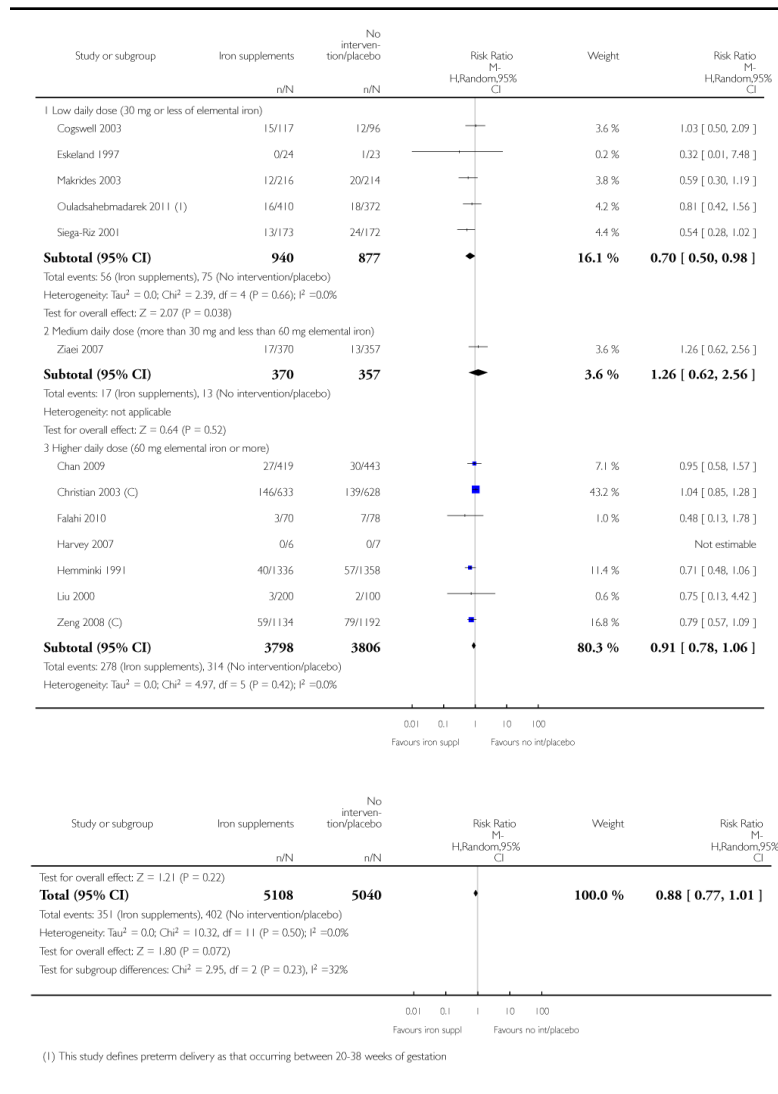

**Analysis 1.15. Comparison 1 Any supplements containing iron versus same supplements without iron or no treatment/placebo (no iron or placebo), Outcome 15 Premature birth (less than 37 weeks of gestation): SUBGROUP ANALYSIS by malarial status of setting.**

Review: Daily oral iron supplementation during pregnancy

Comparison: 1 Any supplements containing iron versus same supplements without iron or no treatment/placebo (no iron or placebo)

## Outcome: 15 Premature birth (less 37 weeks of gestation): SUBGROUP ANALYSIS by malarial status of setting

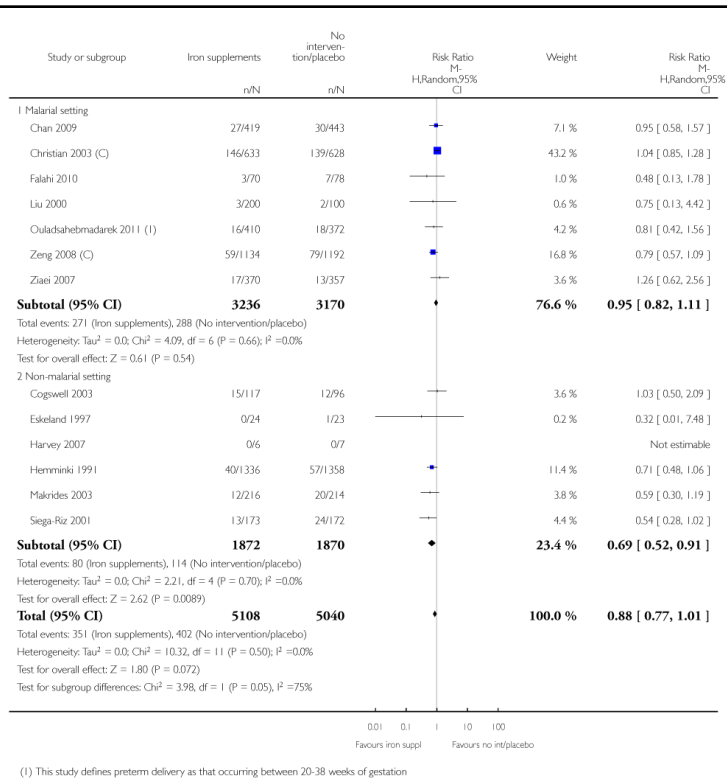

### Analysis 1.16. Comparison 1 Any supplements containing iron versus same supplements without iron or no treatment/placebo (no iron or placebo), Outcome 16 Neonatal death (within 28 days after delivery) (ALL)

Review: Daily oral iron supplementation during pregnancy

Comparison: 1 Any supplements containing iron versus same supplements without iron or no treatment/placebo (no iron or placebo)

Outcome: 16 Neonatal death (within 28 days after delivery) (ALL)

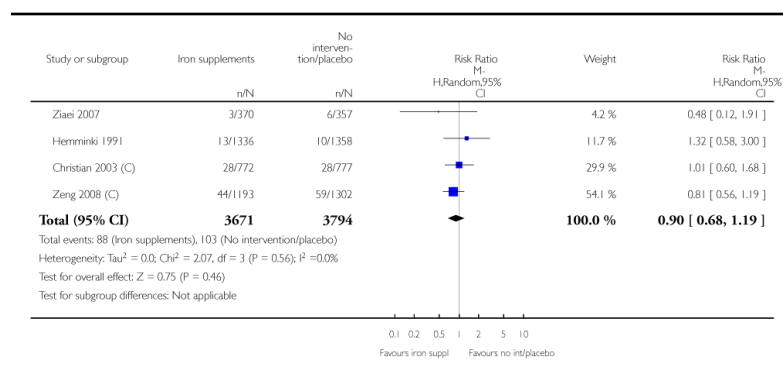

**Analysis 1.17. Comparison 1 Any supplements containing iron versus same supplements without iron or no treatment/placebo (no iron or placebo), Outcome 17 Neonatal death (within 28 days after delivery): SUBGROUP ANALYSIS by gestational age at the start of supplementation.**

Review: Daily oral iron supplementation during pregnancy

Comparison: 1 Any supplements containing iron versus same supplements without iron or no treatment/placebo (no iron or placebo)

Outcome: 17 Neonatal death (within 28 days after delivery): SUBGROUP ANALYSIS by gestational age at the start of supplementation

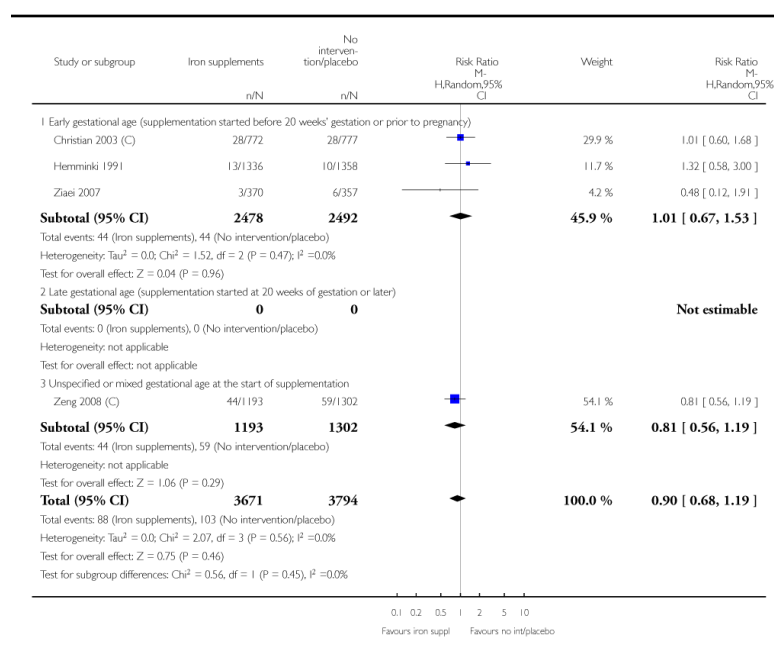

**Analysis 1.18. Comparison 1 Any supplements containing iron versus same supplements without iron or no treatment/placebo (no iron or placebo), Outcome 18 Neonatal death (within 28 days after delivery): SUBGROUP ANALYSIS by anaemia status at the start of supplementation.**

Review: Daily oral iron supplementation during pregnancy

Comparison: 1 Any supplements containing iron versus same supplements without iron or no treatment/placebo (no iron or placebo)

Outcome: 18 Neonatal death (within 28 days after delivery): SUBGROUP ANALYSIS by anaemia status at the start of supplementation

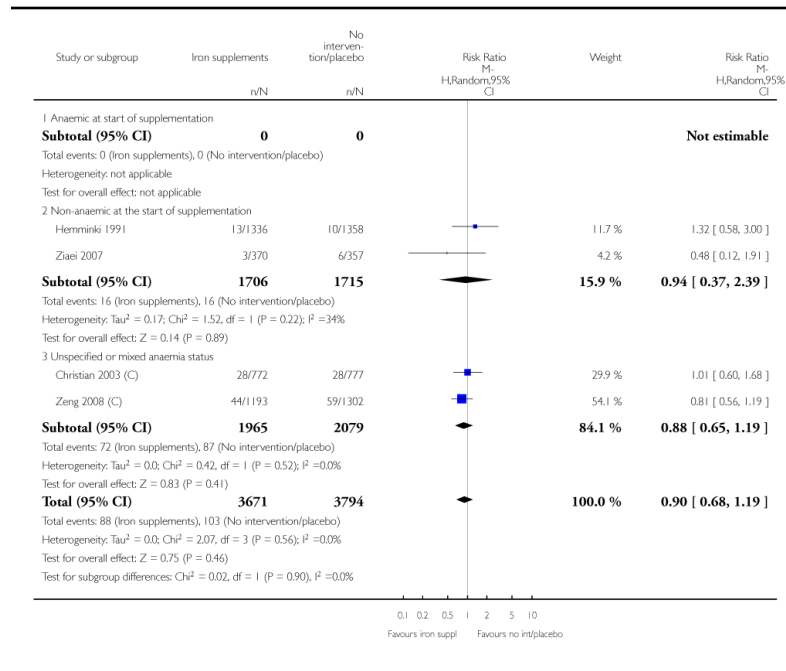

**Analysis 1.19. Comparison 1 Any supplements containing iron versus same supplements without iron or no treatment/placebo (no iron or placebo), Outcome 19 Neonatal death (within 28 days after delivery): SUBGROUP ANALYSIS by dose of iron.**

Review: Daily oral iron supplementation during pregnancy

Comparison: 1 Any supplements containing iron versus same supplements without iron or no treatment/placebo (no iron or placebo)

Outcome: 19 Neonatal death (within 28 days after delivery): SUBGROUP ANALYSIS by dose of iron

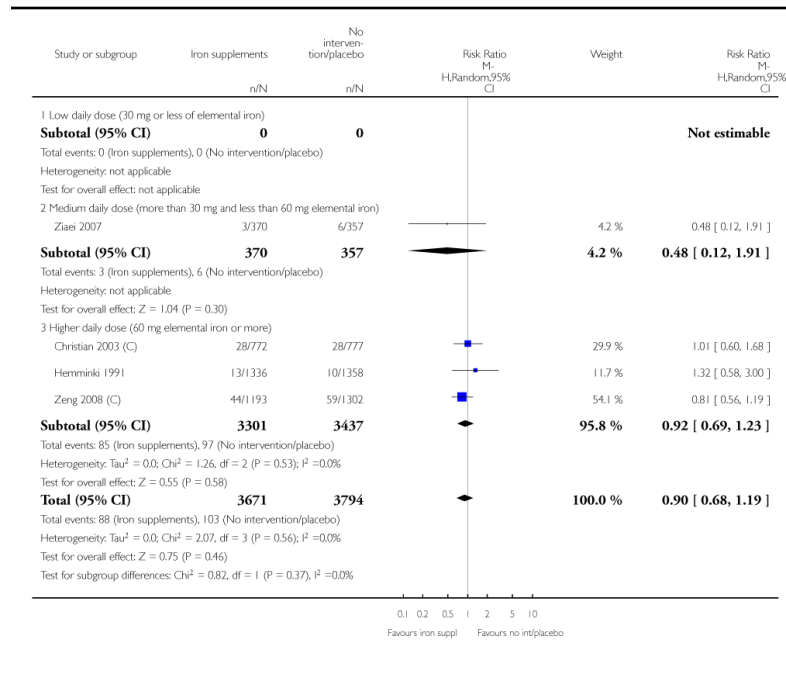

**Analysis 1.20. Comparison 1 Any supplements containing iron versus same supplements without iron or no treatment/placebo (no iron or placebo), Outcome 20 Neonatal death (within 28 days after delivery): SUBGROUP ANALYSIS by malarial status of setting.**

Review: Daily oral iron supplementation during pregnancy

Comparison: 1 Any supplements containing iron versus same supplements without iron or no treatment/placebo (no iron or placebo)

Outcome: 20 Neonatal death (within 28 days after delivery): SUBGROUP ANALYSIS by malarial status of setting

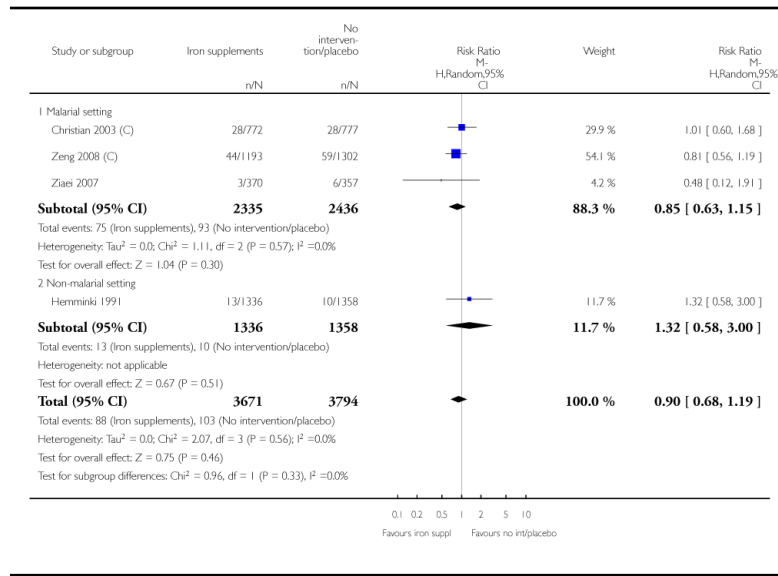

**Analysis 1.21. Comparison 1 Any supplements containing iron versus same supplements without iron or no treatment/placebo (no iron or placebo), Outcome 21 Congenital anomalies (ALL)**

Review: Daily oral iron supplementation during pregnancy

Comparison: 1 Any supplements containing iron versus same supplements without iron or no treatment/placebo (no iron or placebo)

Outcome: 21 Congenital anomalies (ALL)

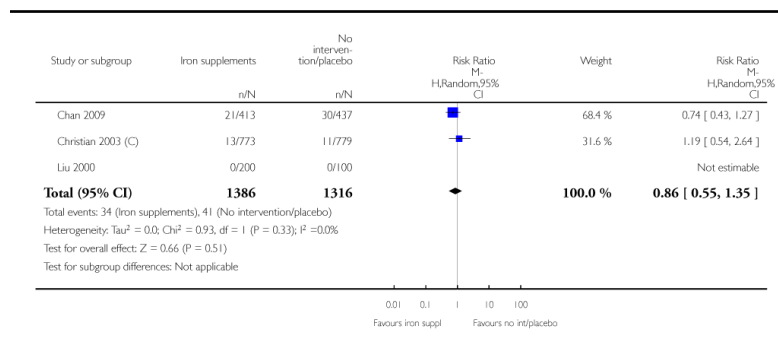

**Analysis 1.22. Comparison 1 Any supplements containing iron versus same supplements without iron or no treatment/placebo (no iron or placebo)**

## placebo), Outcome 22 Congenital anomalies: SUBGROUP ANALYSIS by gestational age at the start of supplementation)

Review: Daily oral iron supplementation during pregnancy

Comparison: 1 Any supplements containing iron versus same supplements without iron or no treatment/placebo (no iron or placebo)

Outcome: 22 Congenital anomalies: SUBGROUP ANALYSIS by gestational age at the start of supplementation)

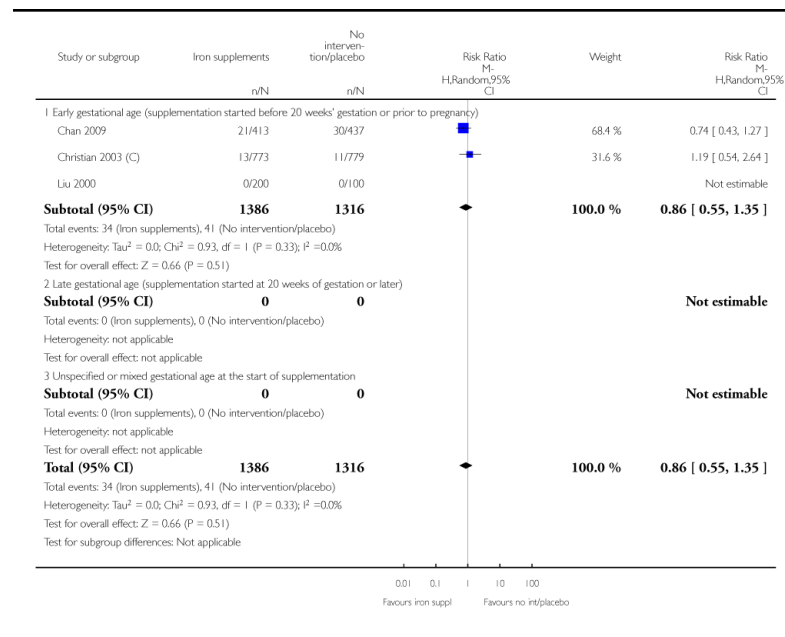

## Analysis 1.23. Comparison 1 Any supplements containing iron versus same supplements without iron or no treatment/placebo (no iron or placebo), Outcome 23 Congenital anomalies: SUBGROUP ANALYSIS by anaemia status at the start of supplementation.

Review: Daily oral iron supplementation during pregnancy

Comparison: 1 Any supplements containing iron versus same supplements without iron or no treatment/placebo (no iron or placebo)

Outcome: 23 Congenital anomalies: SUBGROUP ANALYSIS by anaemia status at the start of supplementation



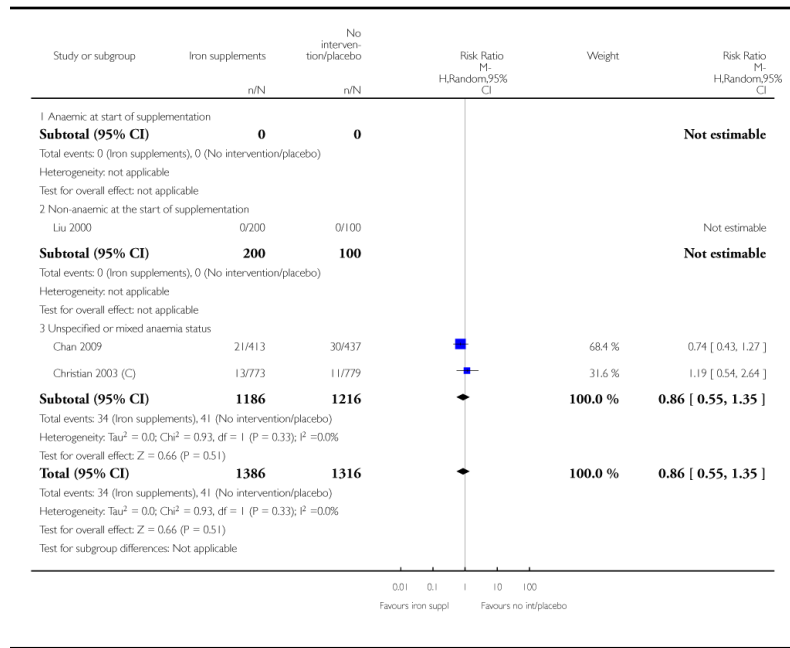

**Analysis 1.24. Comparison 1 Any supplements containing iron versus same supplements without iron or no treatment/placebo (no iron or placebo), Outcome 24 Congenital anomalies: SUBGROUP ANALYSIS by dose of iron.**

Review: Daily oral iron supplementation during pregnancy

Comparison: 1 Any supplements containing iron versus same supplements without iron or no treatment/placebo (no iron or placebo)

Outcome: 24 Congenital anomalies: SUBGROUP ANALYSIS by dose of iron

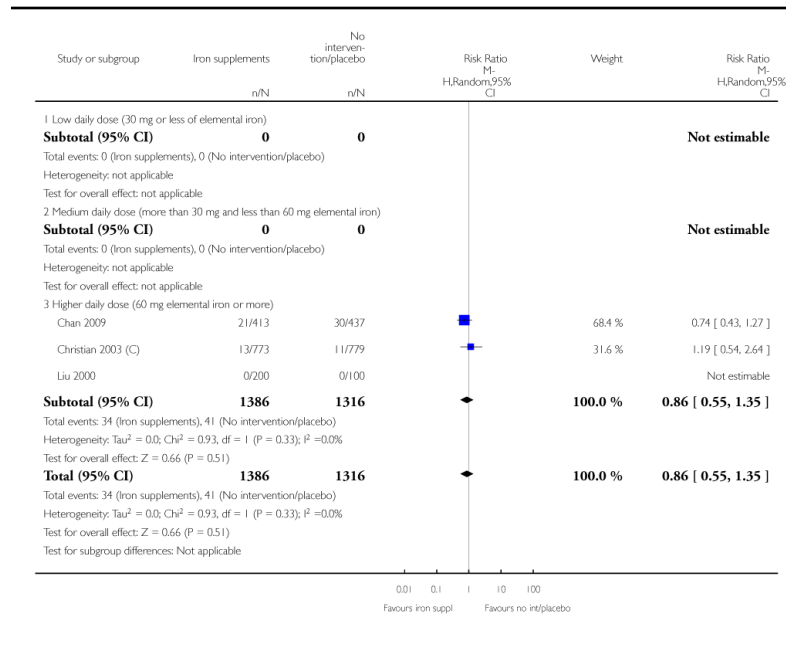

**Analysis 1.25. Comparison 1 Any supplements containing iron versus same supplements without iron or no treatment/placebo (no iron or placebo), Outcome 25 Congenital anomalies: SUBGROUP ANALYSIS by malarial status of setting.**

Review: Daily oral iron supplementation during pregnancy

Comparison: 1 Any supplements containing iron versus same supplements without iron or no treatment/placebo (no iron or placebo)

Outcome: 25 Congenital anomalies: SUBGROUP ANALYSIS by malarial status of setting

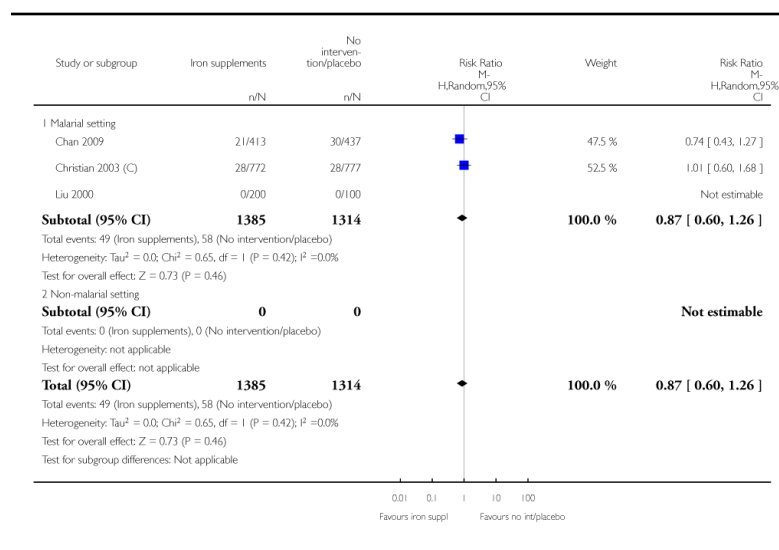

**Analysis 1.26. Comparison 1 Any supplements containing iron versus same supplements without iron or no treatment/placebo (no iron or placebo), Outcome 26 Maternal anaemia at term (Hb less than 110 g/L at 37 weeks' gestation or more) (ALL)**

Review: Daily oral iron supplementation during pregnancy

Comparison: 1 Any supplements containing iron versus same supplements without iron or no treatment/placebo (no iron or placebo)

Outcome: 26 Maternal anaemia at term (Hb less than 110 g/L at 37 weeks' gestation or more) (ALL)

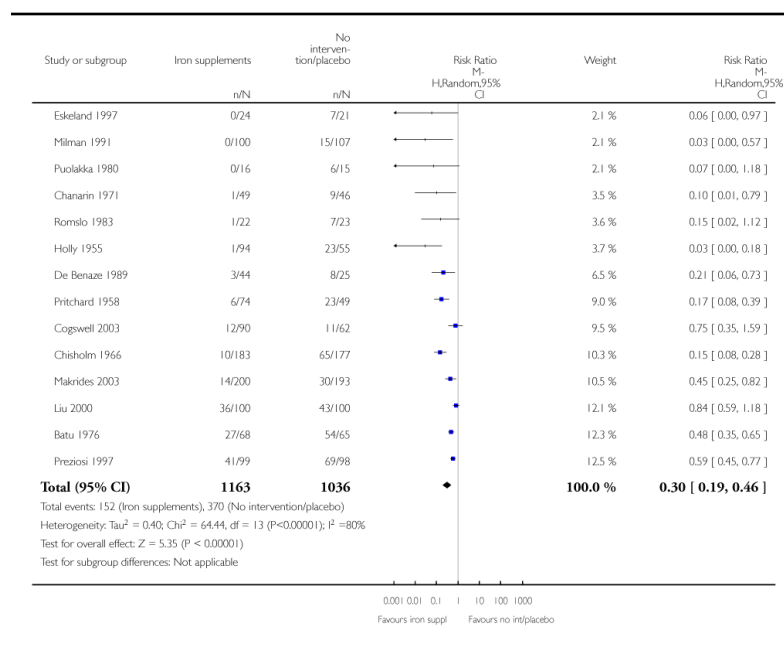

**Analysis 1.27. Comparison 1 Any supplements containing iron versus same supplements without iron or no treatment/placebo (no iron or placebo), Outcome 27 Maternal anaemia at term (Hb less than 110 g/L at 37 weeks' gestation or more): SUBGROUP ANALYSIS by gestational age at the start of supplementation)**

Review: Daily oral iron supplementation during pregnancy

Comparison: 1 Any supplements containing iron versus same supplements without iron or no treatment/placebo (no iron or placebo)

Outcome: 27 Maternal anaemia at term (Hb less than 110 g/L at 37 weeks' gestation or more): SUBGROUP ANALYSIS by gestational age at the start of supplementation):

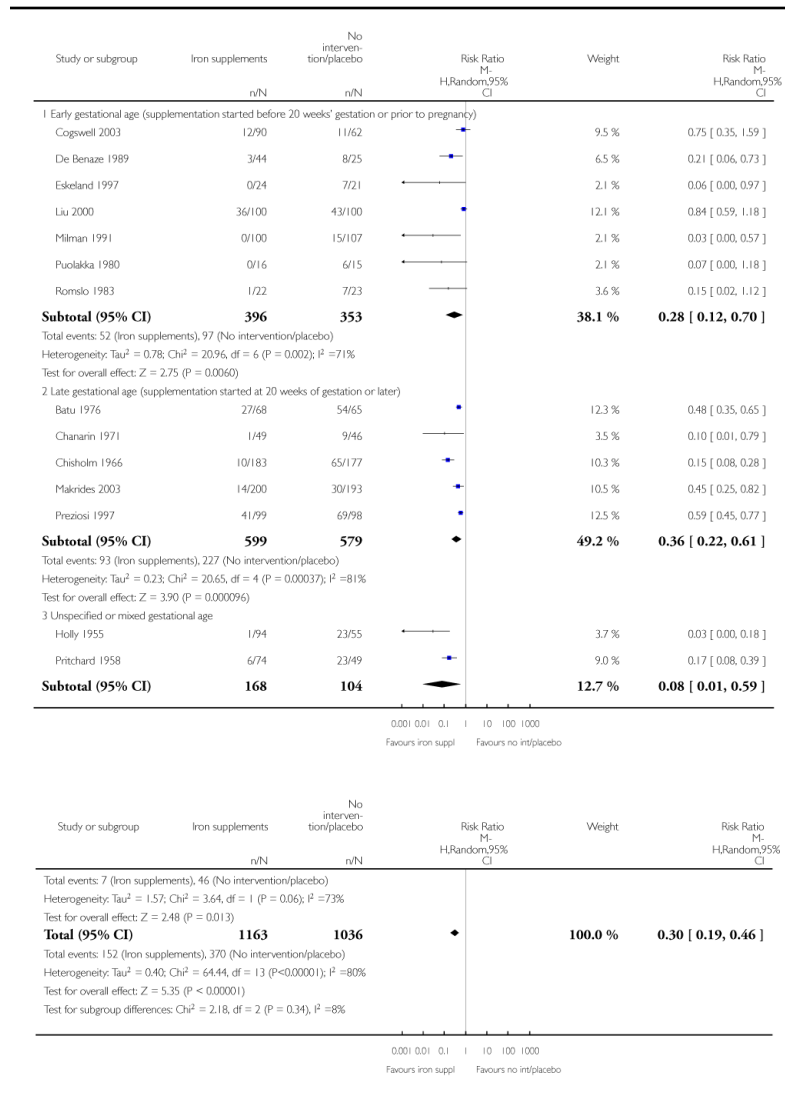

**Analysis 1.28. Comparison 1 Any supplements containing iron versus same supplements without iron or no treatment/placebo (no iron or placebo), Outcome 28 Maternal anaemia at term (Hb less than 110 g/L at 37 weeks' gestation or more): SUBGROUP ANALYSIS by anaemia status at the start of supplementation)**

Review: Daily oral iron supplementation during pregnancy

Comparison: 1 Any supplements containing iron versus same supplements without iron or no treatment/placebo (no iron or placebo)

Outcome: 28 Maternal anaemia at term (Hb less than 110 g/L at 37 weeks' gestation or more): SUBGROUP ANALYSIS by anaemia status at the start of supplementation)

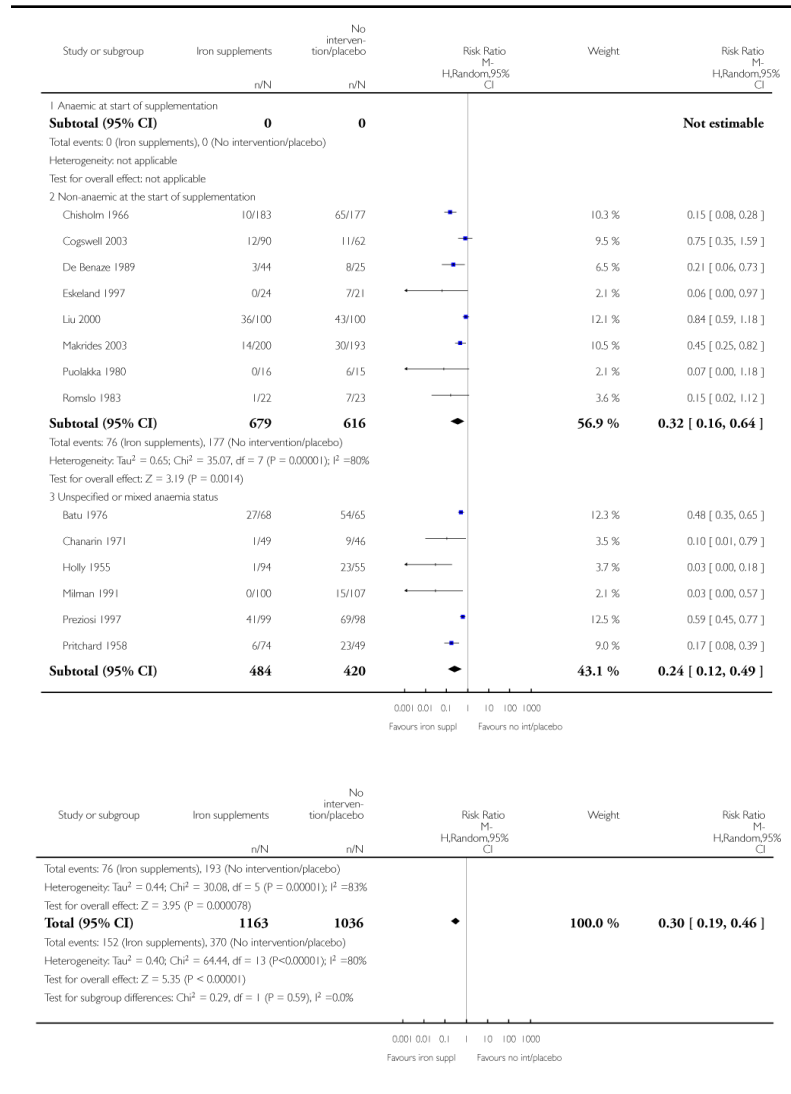

**Analysis 1.29. Comparison 1 Any supplements containing iron versus same supplements without iron or no treatment/placebo (no iron or placebo), Outcome 29 Maternal anaemia at term (Hb less than 110 g/L at 37 weeks' gestation or more): SUBGROUP ANALYSIS by dose of iron)**

Review: Daily oral iron supplementation during pregnancy

Comparison: 1 Any supplements containing iron versus same supplements without iron or no treatment/placebo (no iron or placebo)

Outcome: 29 Maternal anaemia at term (Hb less than 110 g/L at 37 weeks' gestation or more): SUBGROUP ANALYSIS by dose of iron)

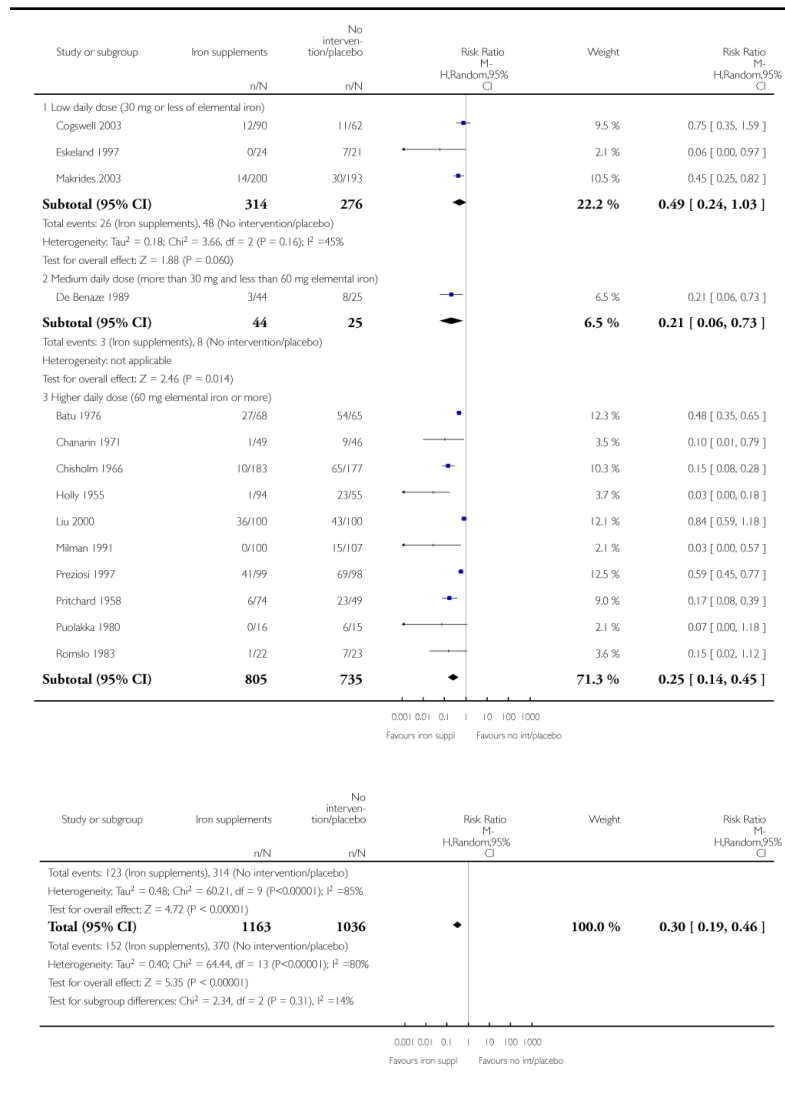

**Analysis 1.30. Comparison 1 Any supplements containing iron versus same supplements without iron or no treatment/placebo (no iron or placebo), Outcome 30 Maternal anaemia at term (Hb less than 110 g/L at 37 weeks' gestation or more): SUBGROUP ANALYSIS by malarial status of setting)**

Review: Daily oral iron supplementation during pregnancy

Comparison: 1 Any supplements containing iron versus same supplements without iron or no treatment/placebo (no iron or placebo)

Outcome: 30 Maternal anaemia at term (Hb less than 110 g/L at 37 weeks' gestation or more): SUBGROUP ANALYSIS by malarial status of setting

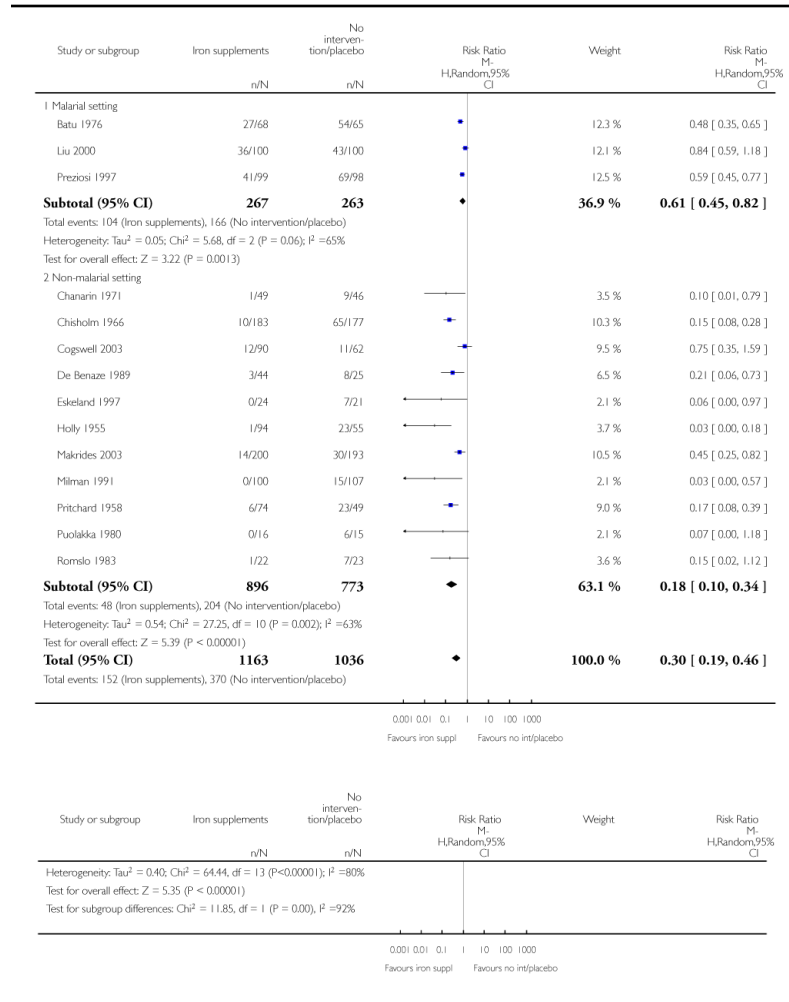

**Analysis 1.31. Comparison 1 Any supplements containing iron versus same supplements without iron or no treatment/placebo (no iron or placebo), Outcome 31 Maternal iron deficiency at term (as defined by as defined by trialists, based on any indicator of iron status at 37 weeks's gestation or more) (ALL)**

Review: Daily oral iron supplementation during pregnancy



Comparison: 1 Any supplements containing iron versus same supplements without iron or no treatment/placebo (no iron or placebo)

Outcome: 31 Maternal iron deficiency at term (as defined by as defined by trialists, based on any indicator of iron status at 37 weeks's gestation or more) (ALL)

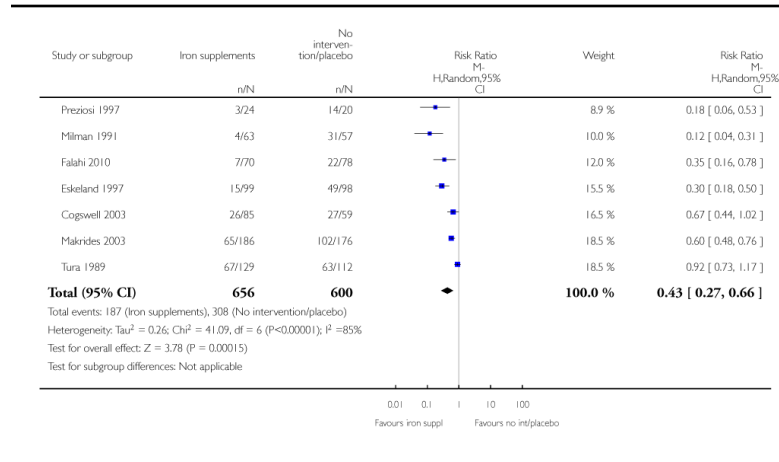

**Analysis 1.32. Comparison 1 Any supplements containing iron versus same supplements without iron or no treatment/placebo (no iron or placebo), Outcome 32 Maternal iron deficiency at term (as defined by as defined by trialists, based on any indicator of iron status at 37 weeks' gestation or more): SUBGROUP ANALYSIS by gestational age at the start of supplementation.**

Review: Daily oral iron supplementation during pregnancy

Comparison: 1 Any supplements containing iron versus same supplements without iron or no treatment/placebo (no iron or placebo)

Outcome: 32 Maternal iron deficiency at term (as defined by as defined by trialists, based on any indicator of iron status at 37 weeks' gestation or more): SUBGROUP ANALYSIS by gestational age at the start of supplementation

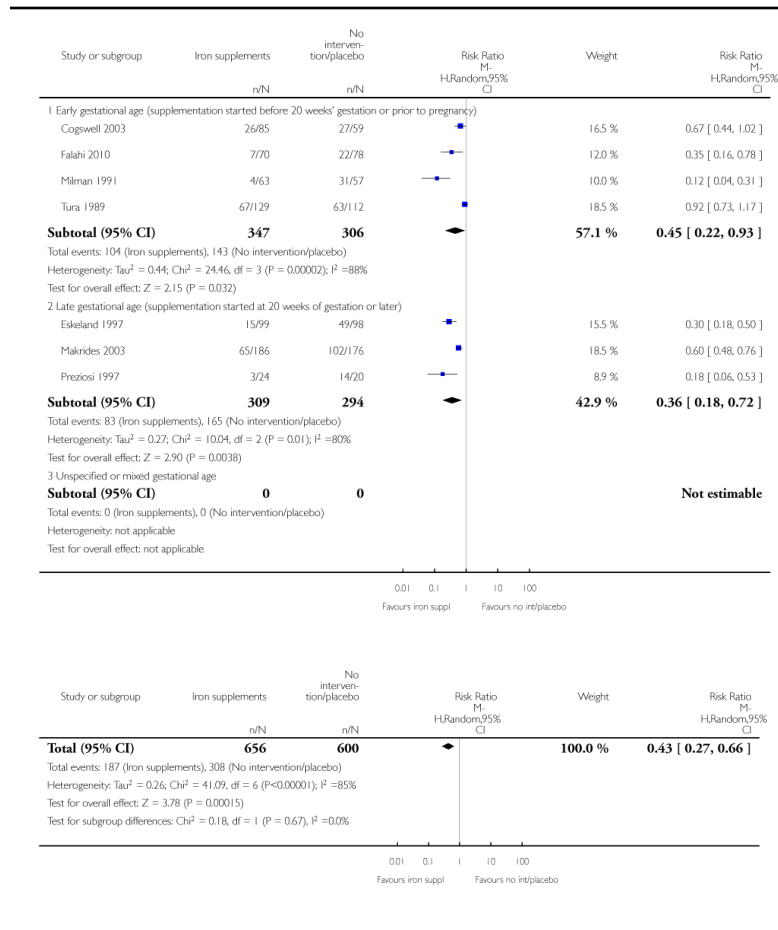

**Analysis 1.33. Comparison 1 Any supplements containing iron versus same supplements without iron or no treatment/placebo (no iron or placebo), Outcome 33 Maternal iron deficiency at term (as defined by as defined by trialists, based on any indicator of iron status at 37 weeks' gestation or more): SUBGROUP ANALYSIS by anaemia status at the start of supplementation.**

Review: Daily oral iron supplementation during pregnancy

Comparison: 1 Any supplements containing iron versus same supplements without iron or no treatment/placebo (no iron or placebo)

Outcome: 33 Maternal iron deficiency at term (as defined by as defined by trialists, based on any indicator of iron status at 37 weeks' gestation or more): SUBGROUP ANALYSIS by anaemia status at the start of supplementation

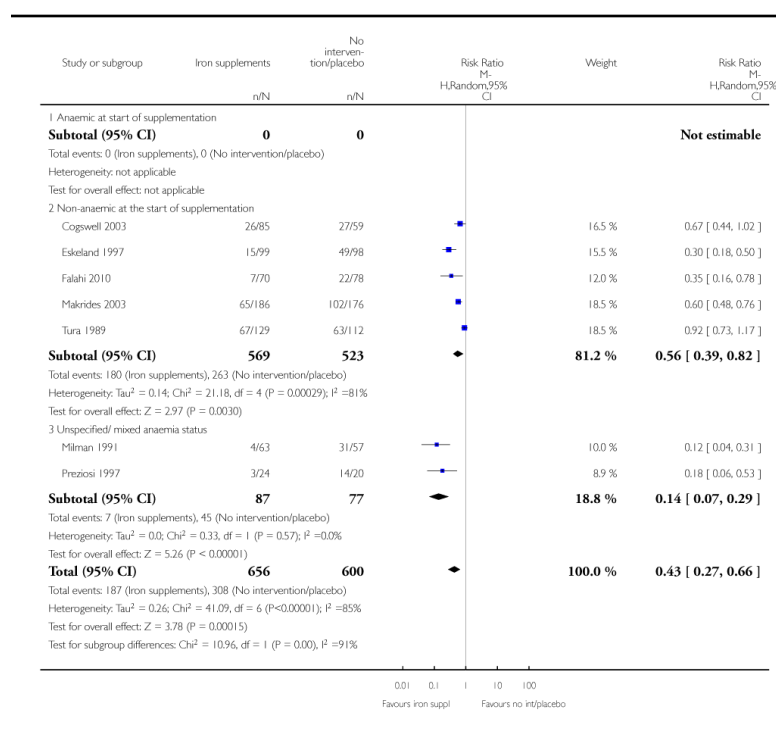

**Analysis 1.34. Comparison 1 Any supplements containing iron versus same supplements without iron or no treatment/placebo (no iron or placebo), Outcome 34 Maternal iron deficiency at term (as defined by as defined by trialists, based on any indicator of iron status at 37 weeks' gestation or more): SUBGROUP ANALYSIS by dose of iron.**

Review: Daily oral iron supplementation during pregnancy

Comparison: 1 Any supplements containing iron versus same supplements without iron or no treatment/placebo (no iron or placebo)

Outcome: 34 Maternal iron deficiency at term (as defined by as defined by trialists, based on any indicator of iron status at 37 weeks' gestation or more): SUBGROUP ANALYSIS by dose of iron

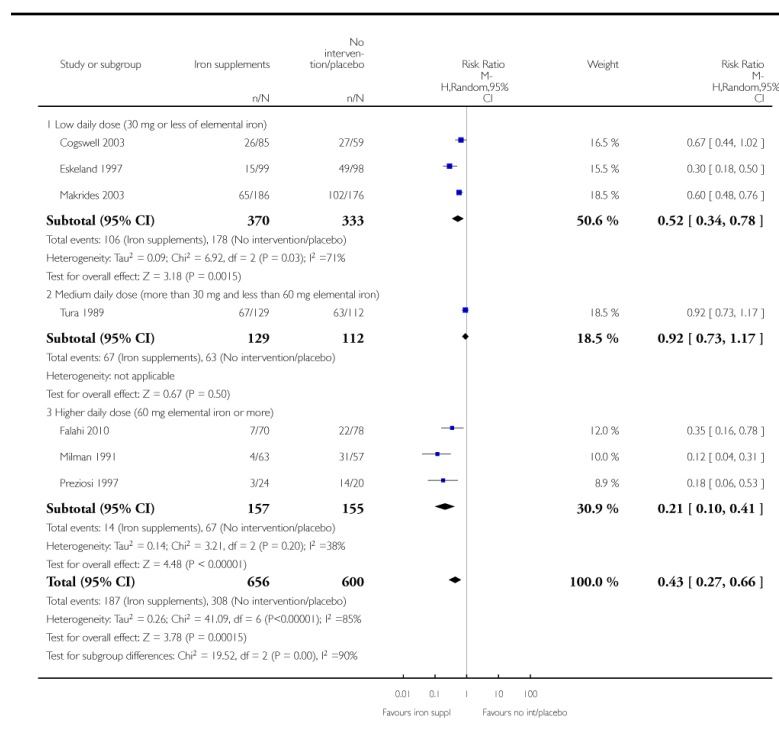

**Analysis 1.35. Comparison 1 Any supplements containing iron versus same supplements without iron or no treatment/placebo (no iron or placebo), Outcome 35 Maternal iron deficiency at term (as defined by trialists, based on any indicator of iron status at 37 weeks' gestation or more): SUBGROUP ANALYSIS by malarial status of setting.**

Review: Daily oral iron supplementation during pregnancy

Comparison: 1 Any supplements containing iron versus same supplements without iron or no treatment/placebo (no iron or placebo)

Outcome: 35 Maternal iron deficiency at term (as defined by trialists, based on any indicator of iron status at 37 weeks' gestation or more): SUBGROUP ANALYSIS by malarial status of setting

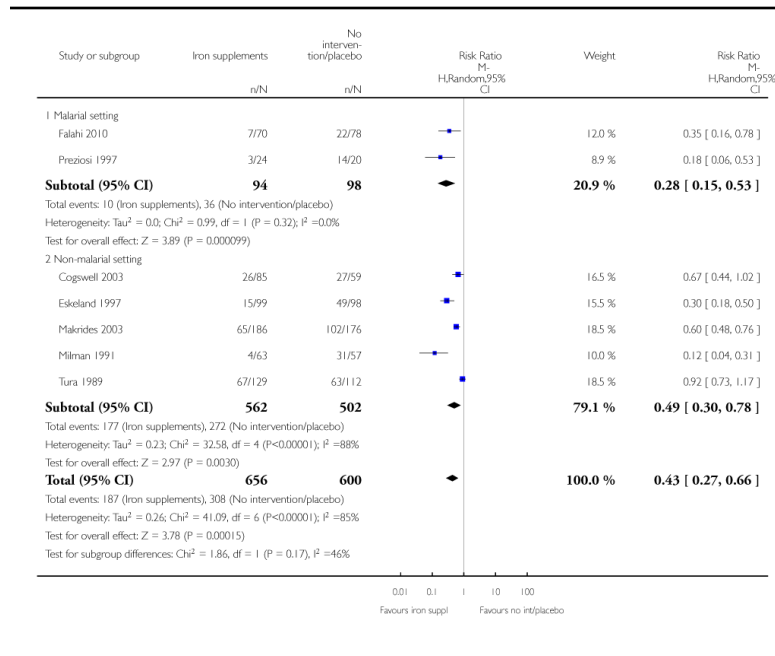

**Analysis 1.36. Comparison 1 Any supplements containing iron versus same supplements without iron or no treatment/placebo (no iron or placebo), Outcome 36 Maternal iron-deficiency anaemia at term (Hb less than 110 g/L and at least one additional laboratory indicators at 37 weeks' gestation or more) (ALL)**

Review: Daily oral iron supplementation during pregnancy

Comparison: 1 Any supplements containing iron versus same supplements without iron or no treatment/placebo (no iron or placebo)

Outcome: 36 Maternal iron-deficiency anaemia at term (Hb less than 110 g/L and at least one additional laboratory indicators at 37 weeks' gestation or more) (ALL)

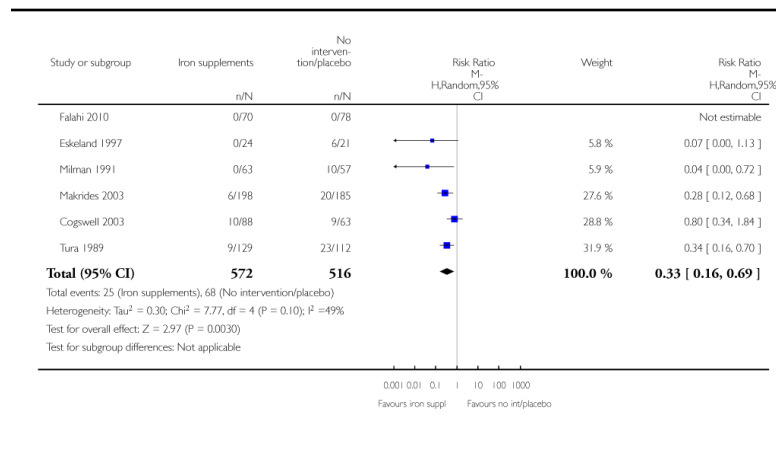

**Analysis 1.37. Comparison 1 Any supplements containing iron versus same supplements without iron or no treatment/placebo (no iron or placebo), Outcome 37 Maternal iron-deficiency anaemia at term (Hb less than 110 g/L and at least one additional laboratory indicators at 37 weeks' gestation): SUBGROUP ANALYSIS by gestational age at the start of supplementation.**

Review: Daily oral iron supplementation during pregnancy

Comparison: 1 Any supplements containing iron versus same supplements without iron or no treatment/placebo (no iron or placebo)

Outcome: 37 Maternal iron-deficiency anaemia at term (Hb less than 110 g/L and at least one additional laboratory indicators at 37 weeks' gestation): SUBGROUP ANALYSIS by gestational age at the start of supplementation

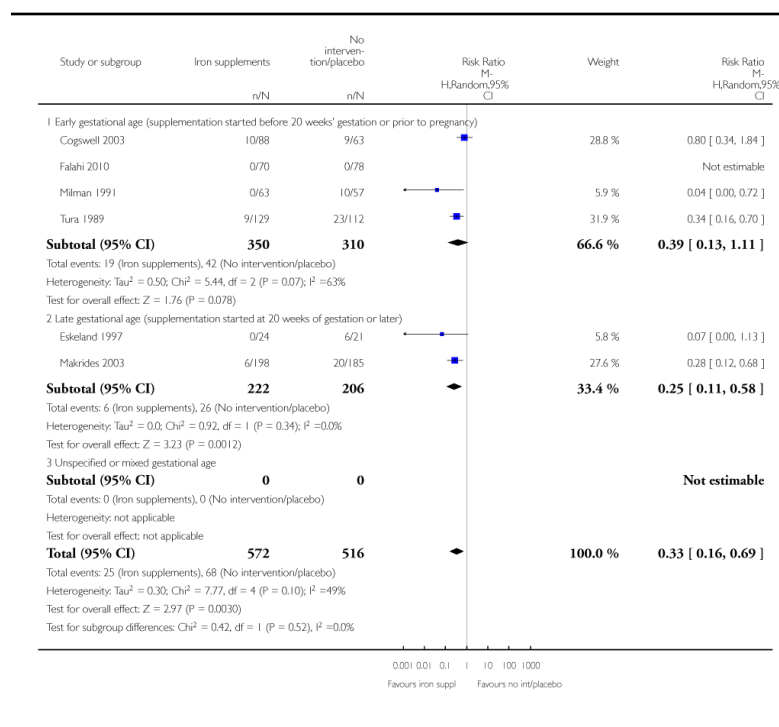

**Analysis 1.38. Comparison 1 Any supplements containing iron versus same supplements without iron or no treatment/placebo (no iron or placebo), Outcome 38 Maternal iron-deficiency anaemia at term (Hb less than 110 g/L and at least one additional laboratory indicators at 37 weeks' gestation or more): SUBGROUP ANALYSIS by anaemia status at the start of supplementation.**

Review: Daily oral iron supplementation during pregnancy

Comparison: 1 Any supplements containing iron versus same supplements without iron or no treatment/placebo (no iron or placebo)

Outcome: 38 Maternal iron-deficiency anaemia at term (Hb less than 110 g/L and at least one additional laboratory indicators at 37 weeks' gestation or more): SUBGROUP ANALYSIS by anaemia status at the start of supplementation

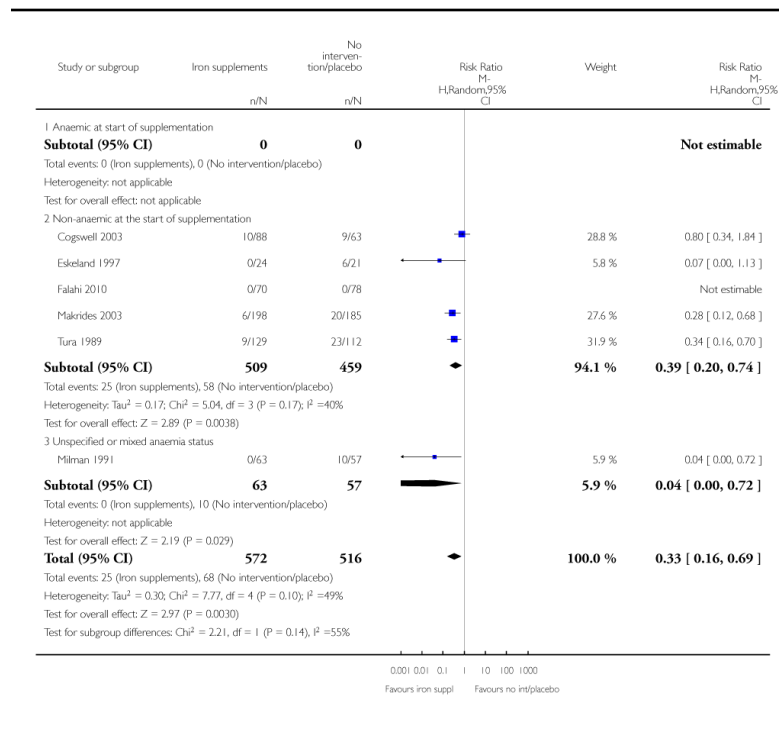

**Analysis 1.39. Comparison 1 Any supplements containing iron versus same supplements without iron or no treatment/placebo (no iron or placebo), Outcome 39 Maternal iron-deficiency anaemia at term (Hb less than 110 g/L and at least one additional laboratory indicators at 37 weeks' gestation or more): SUBGROUP ANALYSIS by dose of iron.**

Review: Daily oral iron supplementation during pregnancy

Comparison: 1 Any supplements containing iron versus same supplements without iron or no treatment/placebo (no iron or placebo)

Outcome: 39 Maternal iron-deficiency anaemia at term (Hb less than 110 g/L and at least one additional laboratory indicators at 37 weeks' gestation or more): SUBGROUP ANALYSIS by dose of iron



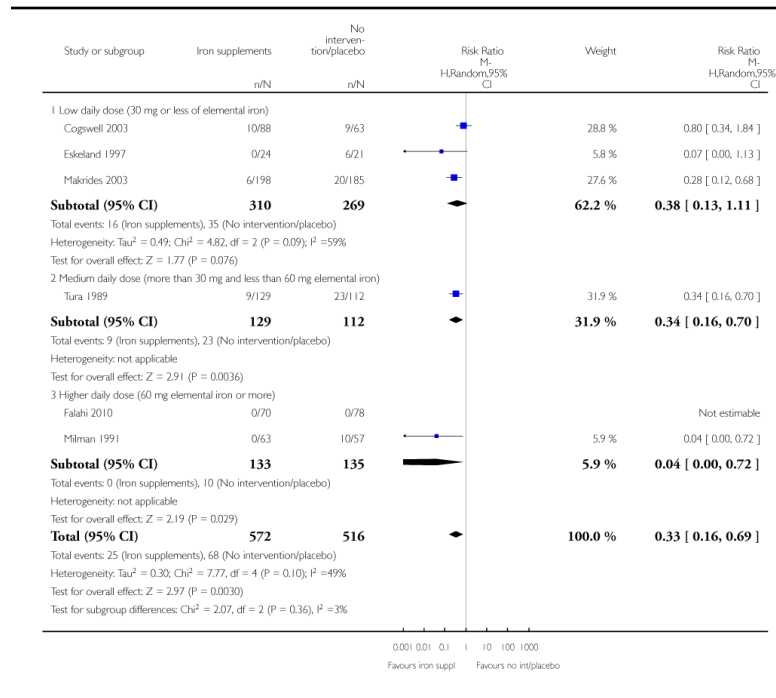

**Analysis 1.40. Comparison 1 Any supplements containing iron versus same supplements without iron or no treatment/placebo (no iron or placebo), Outcome 40 Maternal iron-deficiency anaemia at term (Hb less than 110 g/L and at least one additional laboratory indicators at 37 weeks' gestation or more): SUBGROUP ANALYSIS by malarial status of setting.**

Review: Daily oral iron supplementation during pregnancy

Comparison: 1 Any supplements containing iron versus same supplements without iron or no treatment/placebo (no iron or placebo)

Outcome: 40 Maternal iron-deficiency anaemia at term (Hb less than 110 g/L and at least one additional laboratory indicators at 37 weeks' gestation or more): SUBGROUP ANALYSIS by malarial status of setting

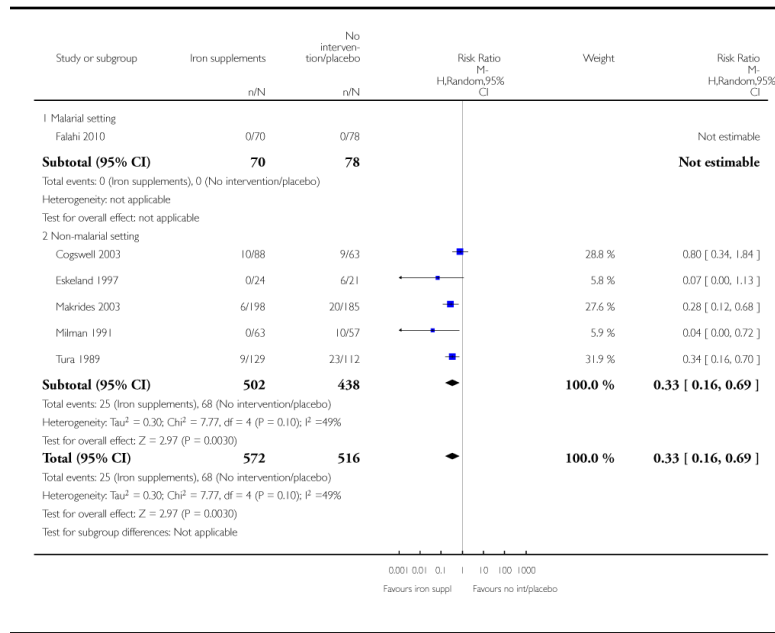

**Analysis 1.41. Comparison 1 Any supplements containing iron versus same supplements without iron or no treatment/placebo (no iron or placebo), Outcome 41 Maternal death (death while pregnant or within 42 days of termination of pregnancy) (ALL)**

Review: Daily oral iron supplementation during pregnancy

Comparison: 1 Any supplements containing iron versus same supplements without iron or no treatment/placebo (no iron or placebo)

Outcome: 41 Maternal death (death while pregnant or within 42 days of termination of pregnancy) (ALL)

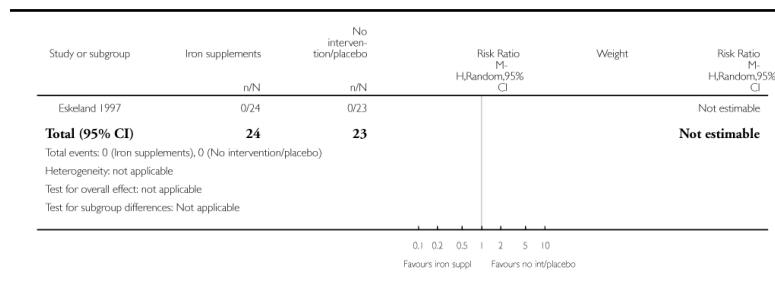

**Analysis 1.42. Comparison 1 Any supplements containing iron versus same supplements without iron or no treatment/placebo (no iron or placebo), Outcome 42 Side effects (any reported throughout the intervention period) (ALL)**

Review: Daily oral iron supplementation during pregnancy

Comparison: 1 Any supplements containing iron versus same supplements without iron or no treatment/placebo (no iron or placebo)

Outcome: 42 Side effects (any reported throughout the intervention period) (ALL)

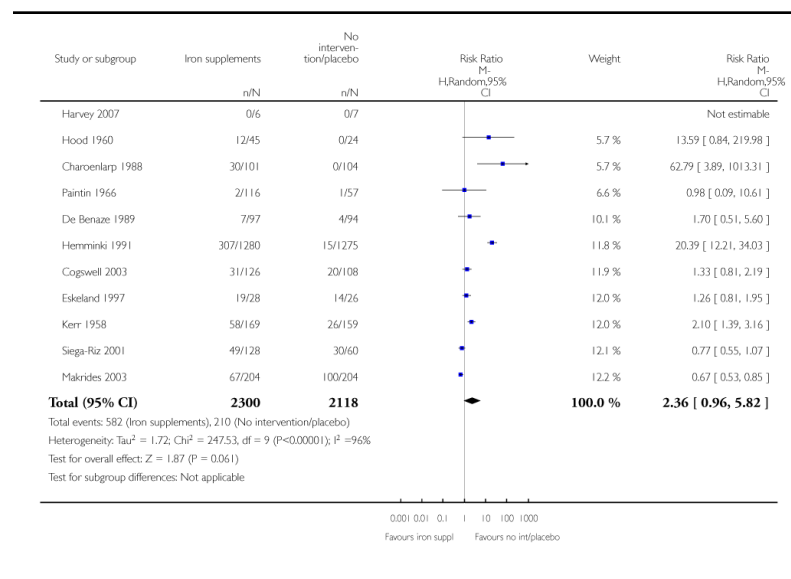

**Analysis 1.43. Comparison 1 Any supplements containing iron versus same supplements without iron or no treatment/placebo (no iron or placebo), Outcome 43 Side effects (any reported throughout the intervention period): SUBGROUP ANALYSIS by gestational age at the start of supplementation:**

Review: Daily oral iron supplementation during pregnancy

Comparison: 1 Any supplements containing iron versus same supplements without iron or no treatment/placebo (no iron or placebo)

Outcome: 43 Side effects (any reported throughout the intervention period): SUBGROUP ANALYSIS by gestational age at the start of supplementation:

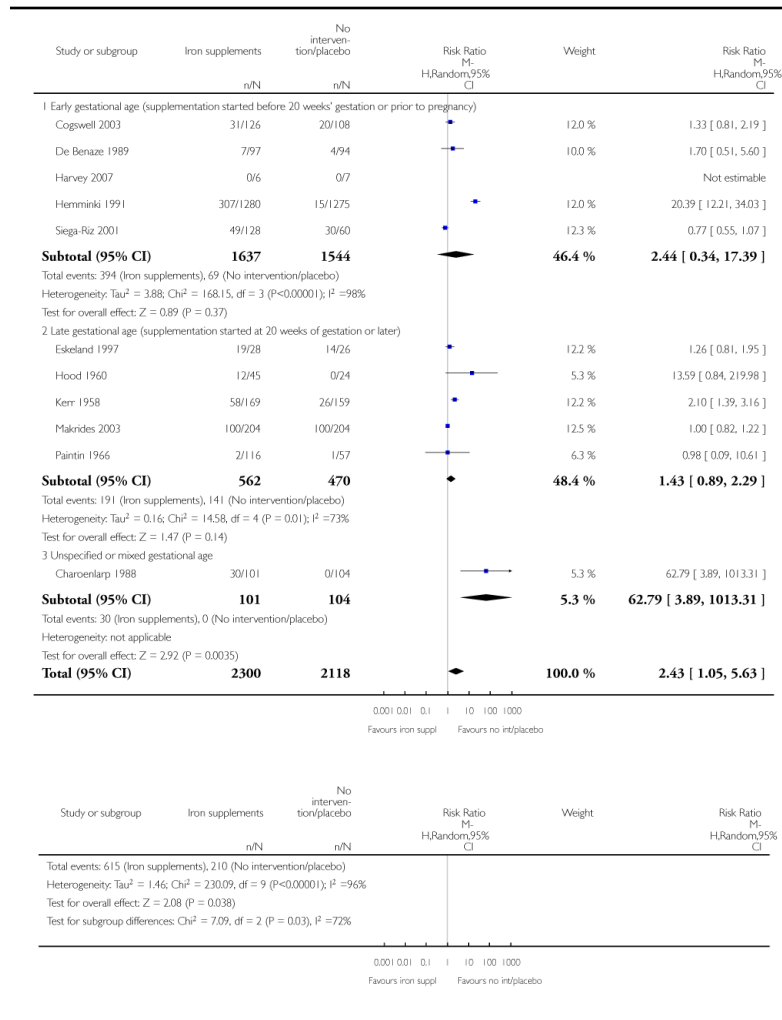

**Analysis 1.44. Comparison 1 Any supplements containing iron versus same supplements without iron or no treatment/placebo (no iron or placebo), Outcome 44 Side effects (any reported throughout the intervention period): SUBGROUP ANALYSIS by anaemia status at the start of supplementation.**

Review: Daily oral iron supplementation during pregnancy

Comparison: 1 Any supplements containing iron versus same supplements without iron or no treatment/placebo (no iron or placebo)

Outcome: 44 Side effects (any reported throughout the intervention period): SUBGROUP ANALYSIS by anaemia status at the start of supplementation

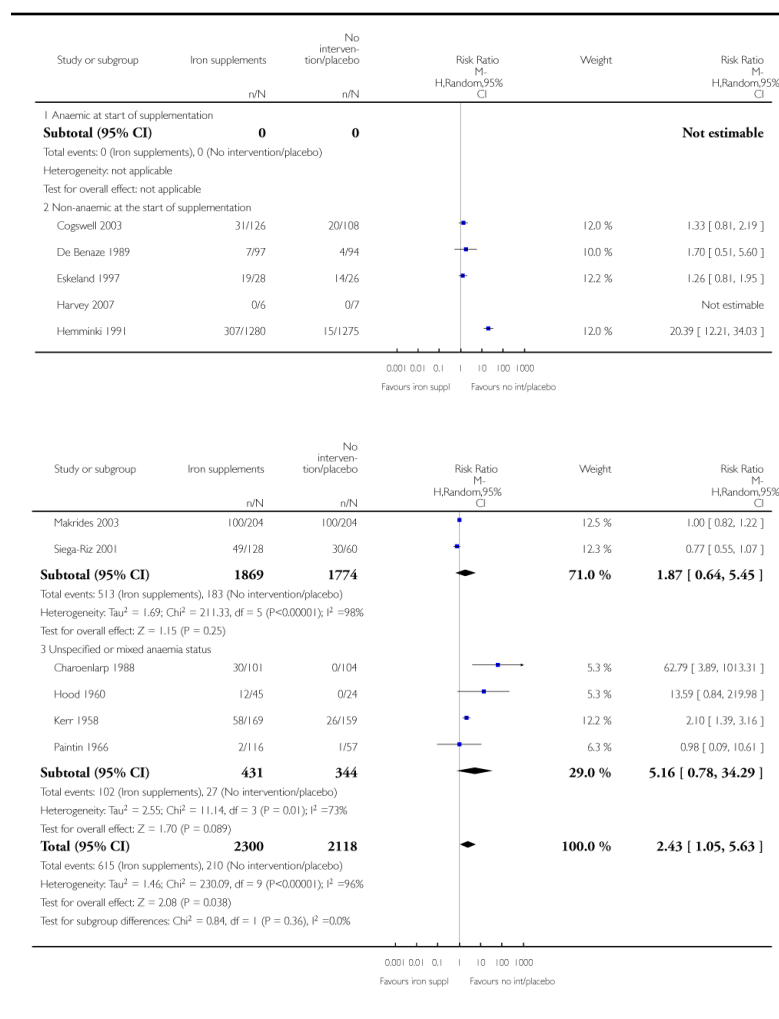

**Analysis 1.45. Comparison 1 Any supplements containing iron versus same supplements without iron or no treatment/placebo (no iron or placebo), Outcome 45 Side effects (any reported throughout the intervention period): SUBGROUP ANALYSIS by dose of iron.**

Review: Daily oral iron supplementation during pregnancy

Comparison: 1 Any supplements containing iron versus same supplements without iron or no treatment/placebo (no iron or placebo)

Outcome: 45 Side effects (any reported throughout the intervention period): SUBGROUP ANALYSIS by dose of iron

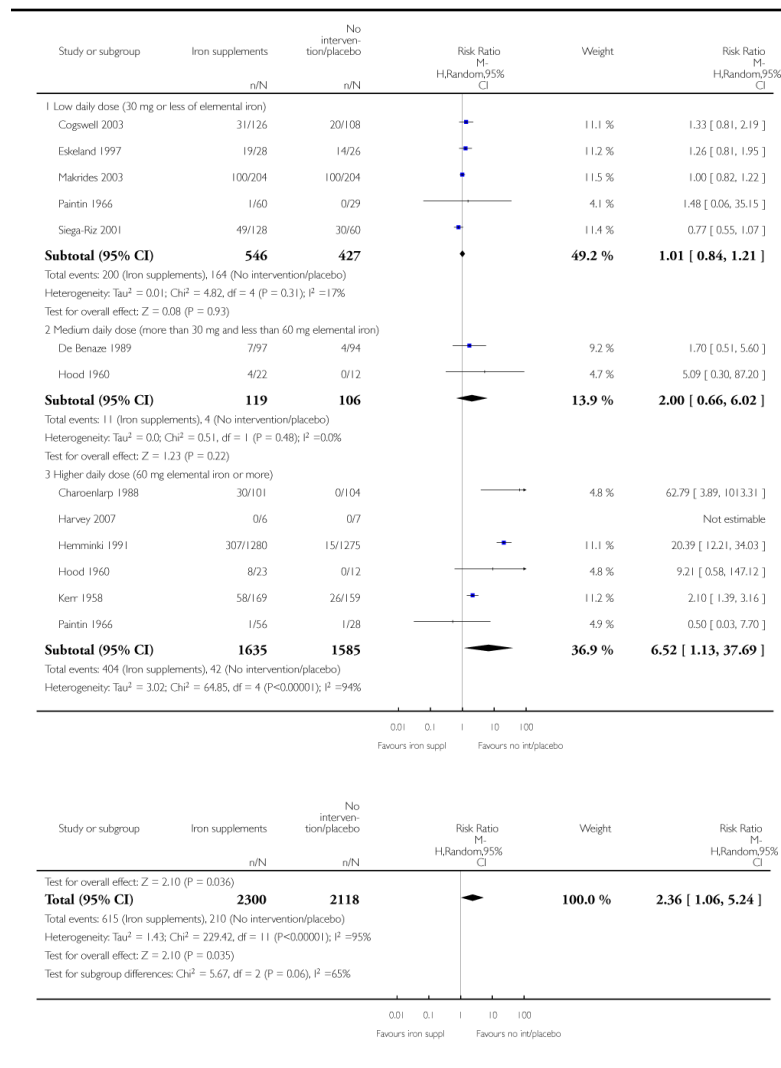

**Analysis 1.46. Comparison 1 Any supplements containing iron versus same supplements without iron or no treatment/placebo (no iron or placebo), Outcome 46 Side effects (any reported throughout the intervention period): SUBGROUP ANALYSIS by malarial status of setting.**

Review: Daily oral iron supplementation during pregnancy

Comparison: 1 Any supplements containing iron versus same supplements without iron or no treatment/placebo (no iron or placebo)

Outcome: 46 Side effects (any reported throughout the intervention period): SUBGROUP ANALYSIS by malarial status of setting

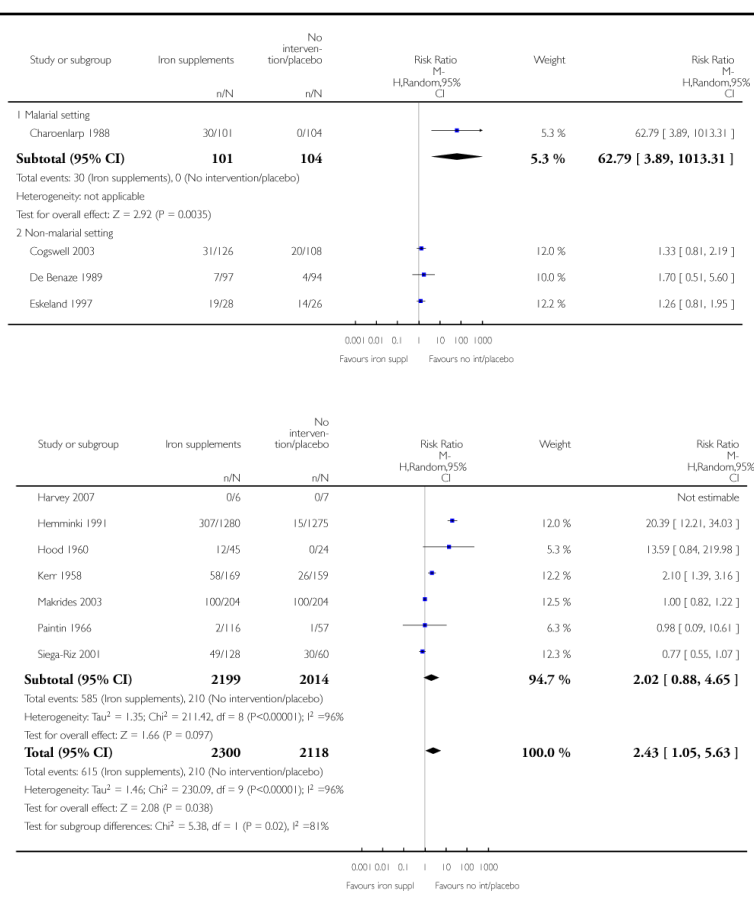

### Analysis 1.47. Comparison 1 Any supplements containing iron versus same supplements without iron or no treatment/placebo (no iron or placebo), Outcome 47 Maternal severe anaemia at any time during second and third trimester (Hb less than 70 g/L) (ALL)

Review: Daily oral iron supplementation during pregnancy

Comparison: 1 Any supplements containing iron versus same supplements without iron or no treatment/placebo (no iron or placebo)

Outcome: 47 Maternal severe anaemia at any time during second and third trimester (Hb less than 70 g/L) (ALL)

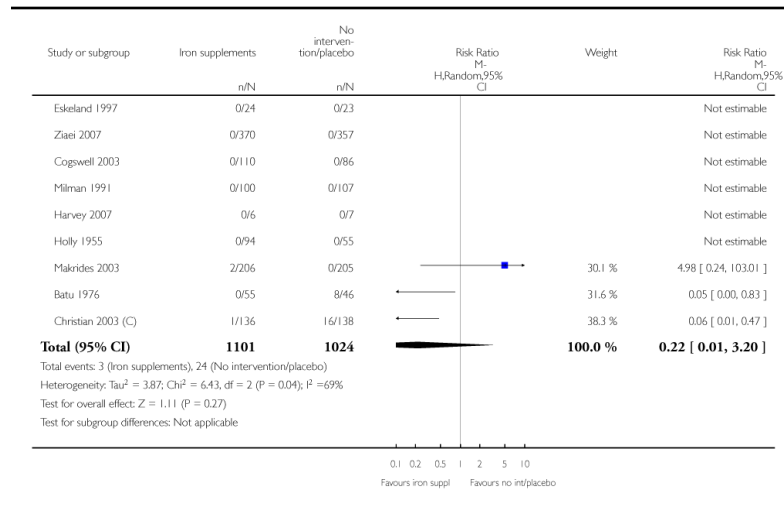

**Analysis 1.48. Comparison 1 Any supplements containing iron versus same supplements without iron or no treatment/placebo (no iron or placebo), Outcome 48 Maternal severe anaemia at any time during second and third trimester (Hb less than 70 g/L): SUBGROUP ANALYSIS by gestational age at the start of supplementation.**

Review: Daily oral iron supplementation during pregnancy

Comparison: 1 Any supplements containing iron versus same supplements without iron or no treatment/placebo (no iron or placebo)

Outcome: 48 Maternal severe anaemia at any time during second and third trimester (Hb less than 70 g/L): SUBGROUP ANALYSIS by gestational age at the start of supplementation



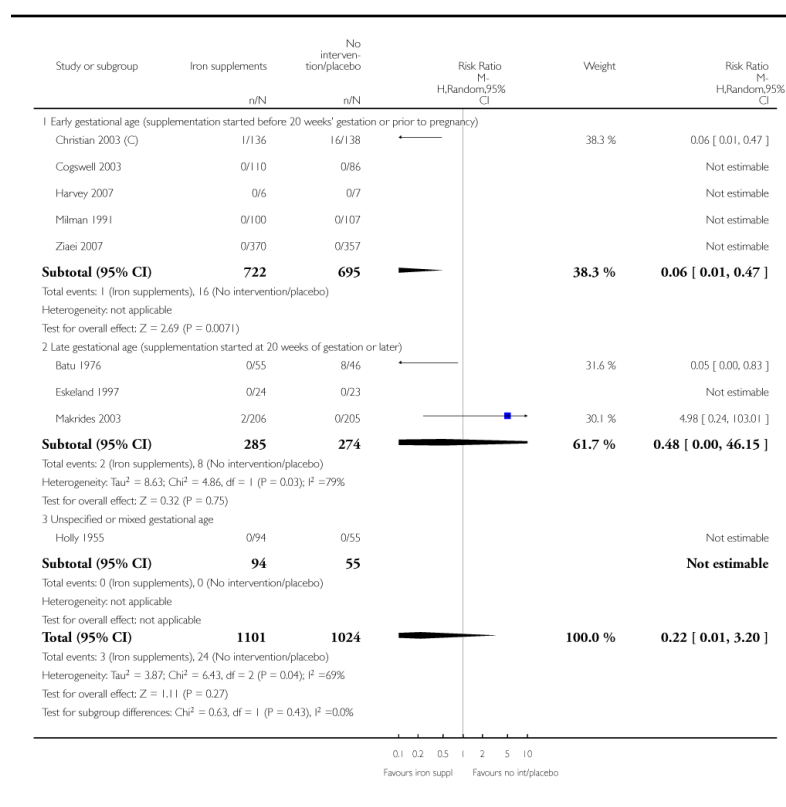

**Analysis 1.49. Comparison 1 Any supplements containing iron versus same supplements without iron or no treatment/placebo (no iron or placebo), Outcome 49 Maternal severe anaemia at any time during second and third trimester (Hb less than 70 g/L): SUBGROUP ANALYSIS by anaemia status at the start of supplementation.**

Review: Daily oral iron supplementation during pregnancy

Comparison: 1 Any supplements containing iron versus same supplements without iron or no treatment/placebo (no iron or placebo)

Outcome: 49 Maternal severe anaemia at any time during second and third trimester (Hb less than 70 g/L): SUBGROUP ANALYSIS by anaemia status at the start of supplementation

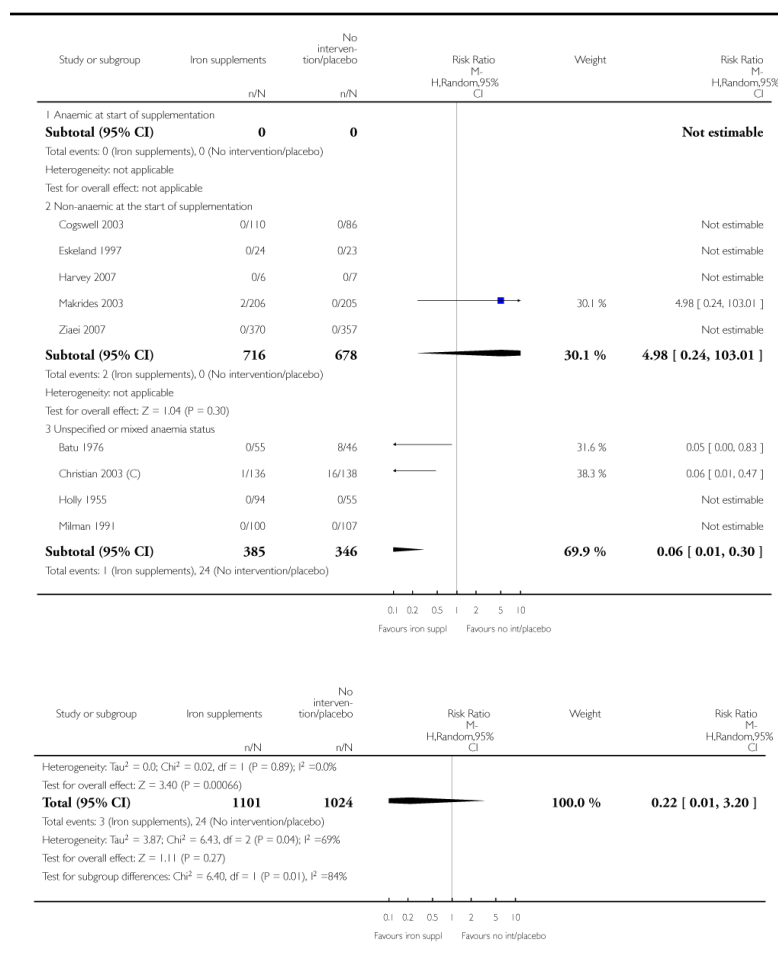

**Analysis 1.50. Comparison 1 Any supplements containing iron versus same supplements without iron or no treatment/placebo (no iron or placebo), Outcome 50 Maternal severe anaemia at any time during second and third trimester (Hb less than 70 g/L): SUBGROUP ANALYSIS by dose of iron.**

Review: Daily oral iron supplementation during pregnancy

Comparison: 1 Any supplements containing iron versus same supplements without iron or no treatment/placebo (no iron or placebo)

Outcome: 50 Maternal severe anaemia at any time during second and third trimester (Hb less than 70 g/L): SUBGROUP ANALYSIS by dose of iron

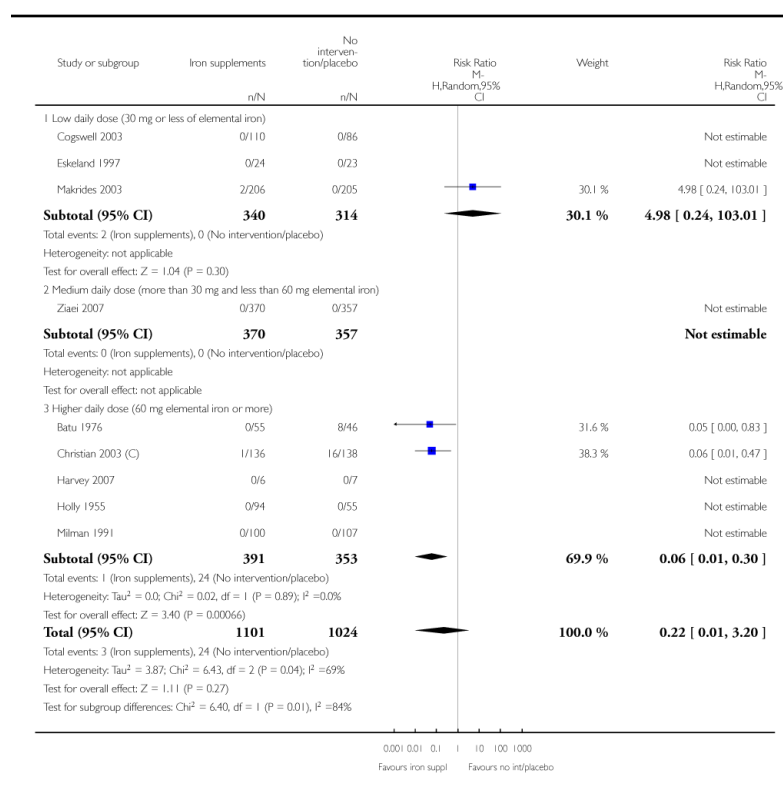

**Analysis 1.51. Comparison 1 Any supplements containing iron versus same supplements without iron or no treatment/placebo (no iron or placebo), Outcome 51 Maternal severe anaemia at any time during second and third trimester (Hb less than 70 g/L): SUBGROUP ANALYSIS by malarial status of setting.**

Review: Daily oral iron supplementation during pregnancy

Comparison: 1 Any supplements containing iron versus same supplements without iron or no treatment/placebo (no iron or placebo)

Outcome: 51 Maternal severe anaemia at any time during second and third trimester (Hb less than 70 g/L): SUBGROUP ANALYSIS by malarial status of setting

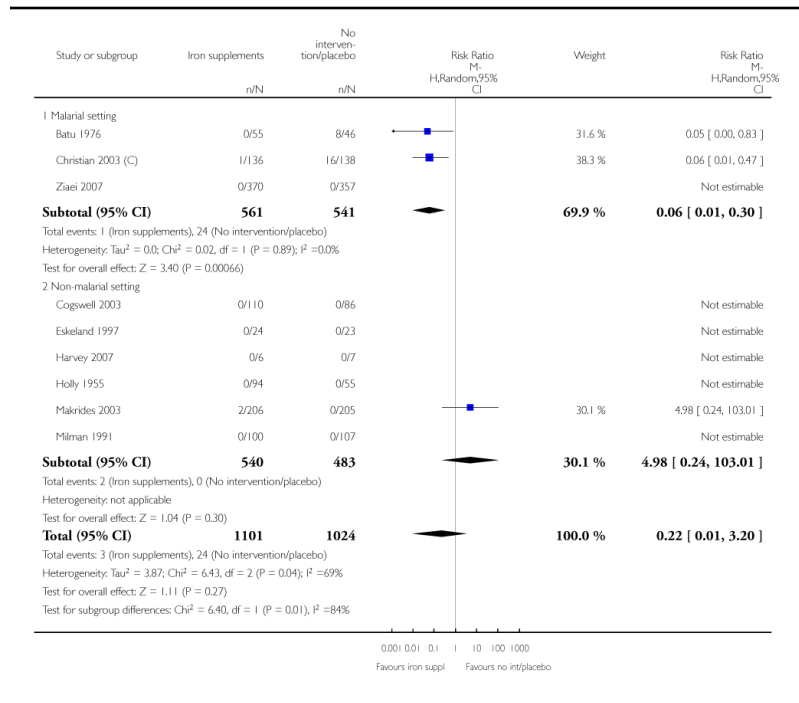

**Analysis 1.53. Comparison 1 Any supplements containing iron versus same supplements without iron or no treatment/placebo (no iron or placebo), Outcome 53 Infection during pregnancy (including urinary tract infections) (ALL)**

Review: Daily oral iron supplementation during pregnancy

Comparison: 1 Any supplements containing iron versus same supplements without iron or no treatment/placebo (no iron or placebo)

Outcome: 53 Infection during pregnancy (including urinary tract infections) (ALL)

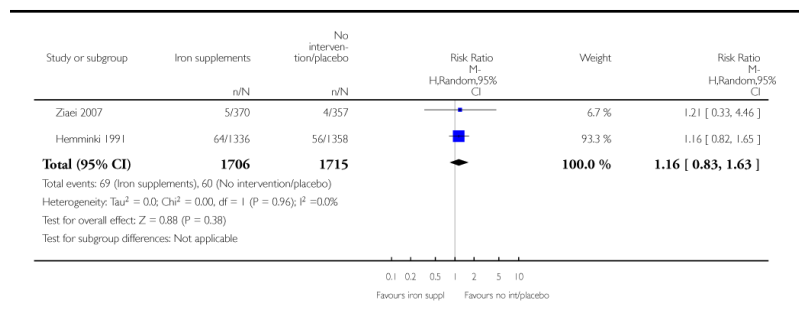

**Analysis 1.54. Comparison 1 Any supplements containing iron versus same supplements without iron or no treatment/placebo (no iron or placebo), Outcome 54 Infection during pregnancy (including urinary tract infections): SUBGROUP ANALYSIS by gestational age at the start of supplementation.**

Review: Daily oral iron supplementation during pregnancy

Comparison: 1 Any supplements containing iron versus same supplements without iron or no treatment/placebo (no iron or placebo)

Outcome: 54 Infection during pregnancy (including urinary tract infections): SUBGROUP ANALYSIS by gestational age at the start of supplementation

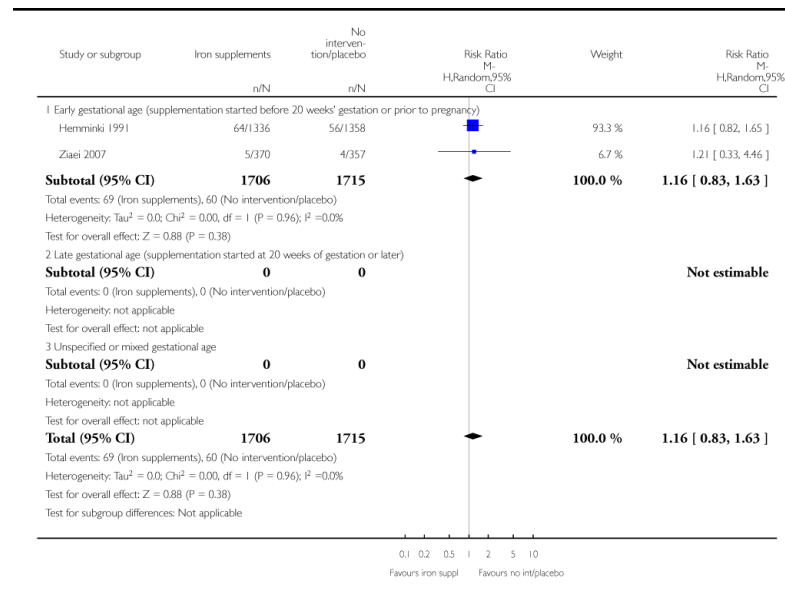

**Analysis 1.55. Comparison 1 Any supplements containing iron versus same supplements without iron or no treatment/placebo (no iron or placebo), Outcome 55 Infection during pregnancy (including urinary tract infections): SUBGROUP ANALYSIS by anaemia status at the start of supplementation.**

Review: Daily oral iron supplementation during pregnancy

Comparison: 1 Any supplements containing iron versus same supplements without iron or no treatment/placebo (no iron or placebo)

Outcome: 55 Infection during pregnancy (including urinary tract infections): SUBGROUP ANALYSIS by anaemia status at the start of supplementation

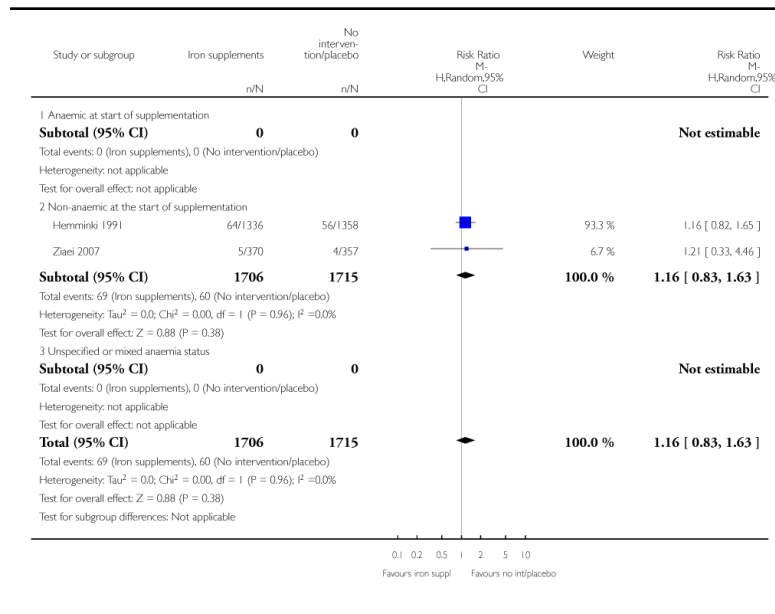

**Analysis 1.56. Comparison 1 Any supplements containing iron versus same supplements without iron or no treatment/placebo (no iron or placebo), Outcome 56 Infection during pregnancy (including urinary tract infections): SUBGROUP ANALYSIS by dose of iron.**

Review: Daily oral iron supplementation during pregnancy

Comparison: 1 Any supplements containing iron versus same supplements without iron or no treatment/placebo (no iron or placebo)

Outcome: 56 Infection during pregnancy (including urinary tract infections): SUBGROUP ANALYSIS by dose of iron

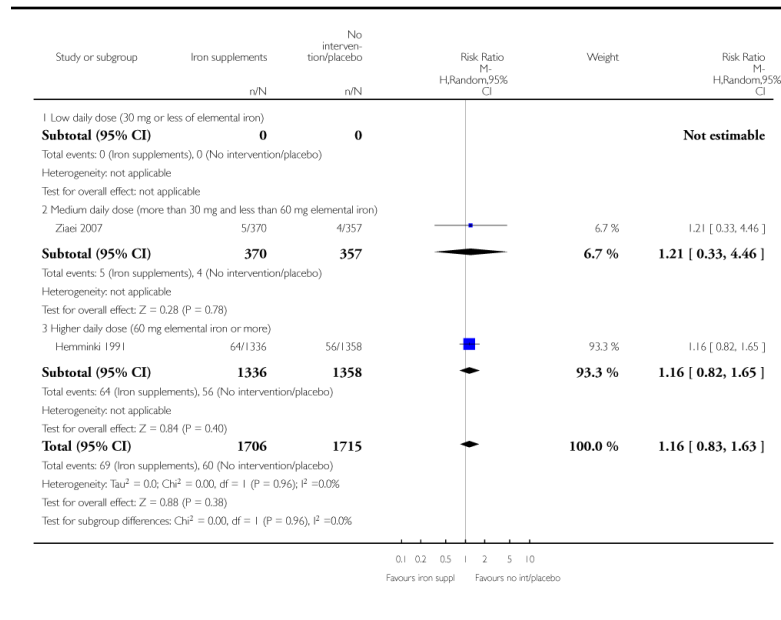

**Analysis 1.57. Comparison 1 Any supplements containing iron versus same supplements without iron or no treatment/placebo (no iron or placebo), Outcome 57 Infection during pregnancy (including urinary tract infections): SUBGROUP ANALYSIS by malarial status of setting.**

Review: Daily oral iron supplementation during pregnancy

Comparison: 1 Any supplements containing iron versus same supplements without iron or no treatment/placebo (no iron or placebo)

Outcome: 57 Infection during pregnancy (including urinary tract infections): SUBGROUP ANALYSIS by malarial status of setting

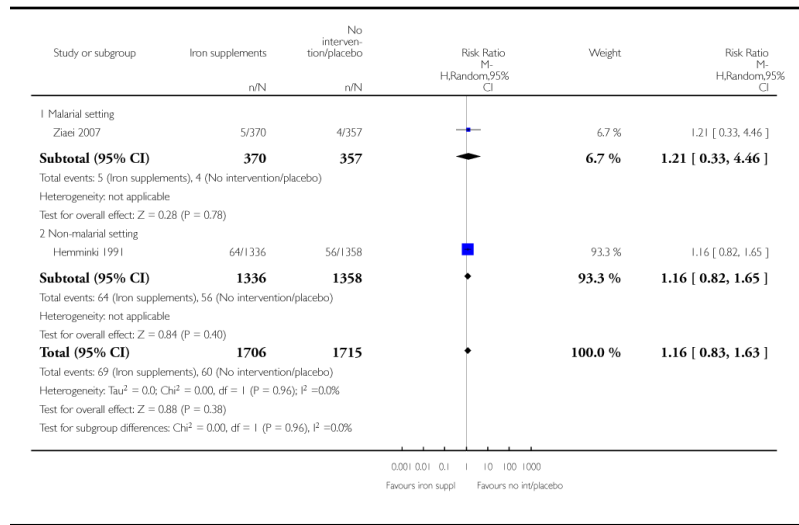

**Analysis 1.58. Comparison 1 Any supplements containing iron versus same supplements without iron or no treatment/placebo (no iron or placebo), Outcome 58 Very low birthweight (less than 1500 g) (ALL)**

Review: Daily oral iron supplementation during pregnancy

Comparison: 1 Any supplements containing iron versus same supplements without iron or no treatment/placebo (no iron or placebo)

Outcome: 58 Very low birthweight (less than 1500 g) (ALL)

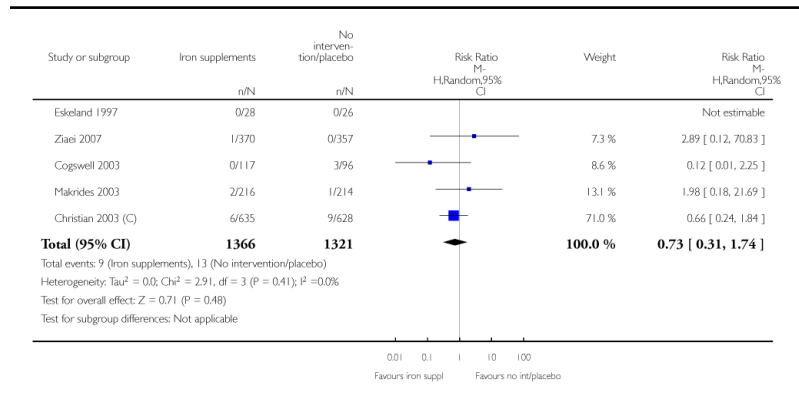

**Analysis 1.59. Comparison 1 Any supplements containing iron versus same supplements without iron or no treatment/placebo (no iron or placebo), Outcome 58 Very low birthweight (less than 1500 g) (ALL)**



**placebo), Outcome 59 Very premature birth (less than 34 weeks' gestation) (ALL)**

Review: Daily oral iron supplementation during pregnancy

Comparison: 1 Any supplements containing iron versus same supplements without iron or no treatment/placebo (no iron or placebo)

Outcome: 59 Very premature birth (less than 34 weeks' gestation) (ALL)

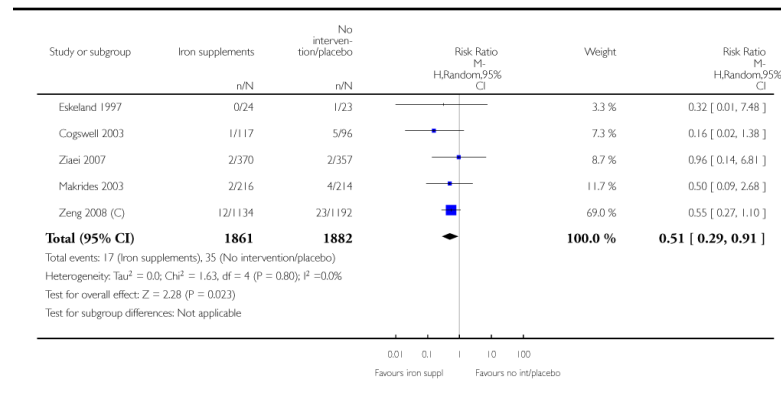

**Analysis 1.60. Comparison 1 Any supplements containing iron versus same supplements without iron or no treatment/placebo (no iron or placebo), Outcome 60 Infant Hb concentration within the first 6 months (in g/L counting the last reported measure after birth within this period) (ALL)**

Review: Daily oral iron supplementation during pregnancy

Comparison: 1 Any supplements containing iron versus same supplements without iron or no treatment/placebo (no iron or placebo)

Outcome: 60 Infant Hb concentration within the first 6 months (in g/L counting the last reported measure after birth within this period) (ALL)

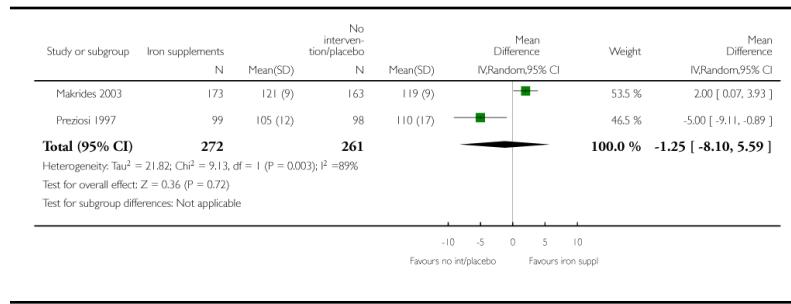

**Analysis 1.61. Comparison 1 Any supplements containing iron versus same supplements without iron or no treatment/placebo (no iron or placebo), Outcome 61 Infant serum ferritin concentration within first 6 months (in  $\mu\text{g/L}$  counting the last reported measure after birth within this period) (ALL)**

Review: Daily oral iron supplementation during pregnancy

Comparison: 1 Any supplements containing iron versus same supplements without iron or no treatment/placebo (no iron or placebo)

Outcome: 61 Infant serum ferritin concentration within first 6 months (in  $\mu\text{g/L}$  counting the last reported measure after birth within this period) (ALL)

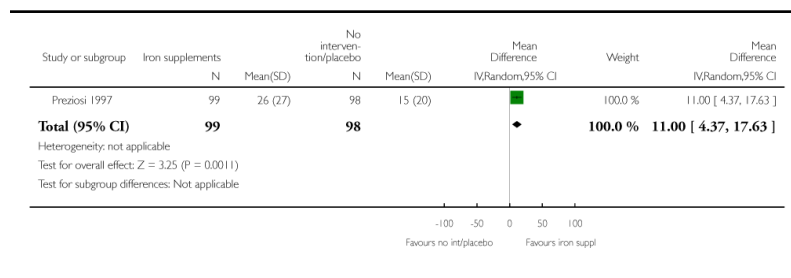

**Analysis 1.62. Comparison 1 Any supplements containing iron versus same supplements without iron or no treatment/placebo (no iron or placebo), Outcome 62 Admission to special care unit (ALL)**

Review: Daily oral iron supplementation during pregnancy

Comparison: 1 Any supplements containing iron versus same supplements without iron or no treatment/placebo (no iron or placebo)

Outcome: 62 Admission to special care unit (ALL)

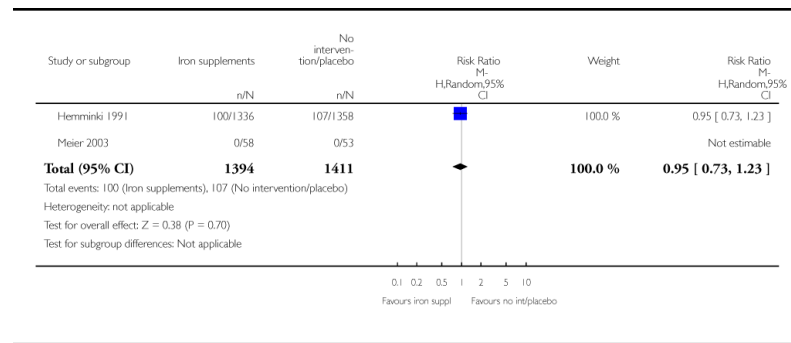

**Analysis 1.63. Comparison 1 Any supplements containing iron versus same supplements without iron or no treatment/placebo (no iron or placebo), Outcome 63 Maternal anaemia at or near term (Hb less than 110 g/L at 34 weeks' gestation or more) (ALL)**

Review: Daily oral iron supplementation during pregnancy

Comparison: 1 Any supplements containing iron versus same supplements without iron or no treatment/placebo (no iron or placebo)

Outcome: 63 Maternal anaemia at or near term (Hb less than 110 g/L at 34 weeks' gestation or more) (ALL)

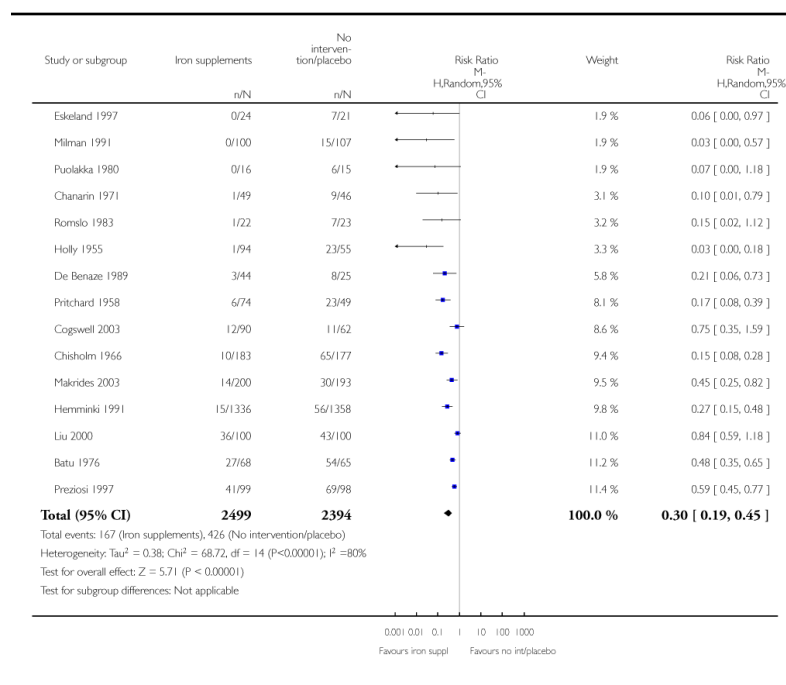

**Analysis 1.64. Comparison 1 Any supplements containing iron versus same supplements without iron or no treatment/placebo (no iron or placebo), Outcome 64 Maternal iron deficiency at or near term (as defined by as defined by trialists, based on any indicator of iron status at 34 weeks's gestation or more)) (ALL)**

Review: Daily oral iron supplementation during pregnancy

Comparison: 1 Any supplements containing iron versus same supplements without iron or no treatment/placebo (no iron or placebo)

Outcome: 64 Maternal iron deficiency at or near term (as defined by as defined by trialists, based on any indicator of iron status at 34 weeks's gestation or more)) (ALL)

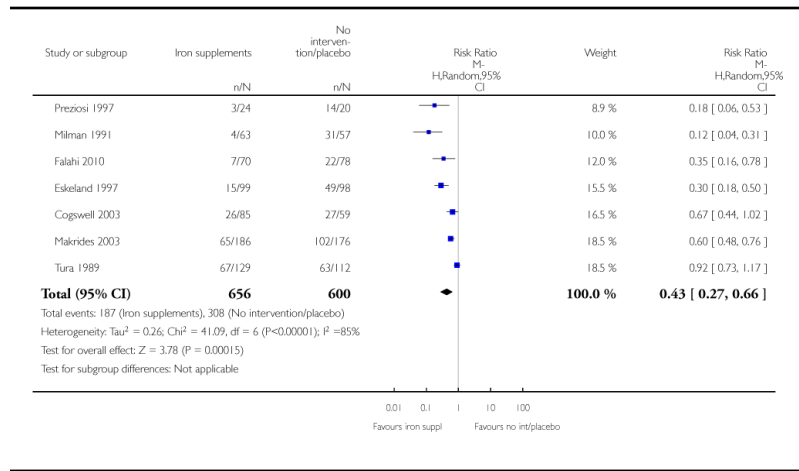

**Analysis 1.65. Comparison 1 Any supplements containing iron versus same supplements without iron or no treatment/placebo (no iron or placebo), Outcome 65 Maternal iron-deficiency anaemia at or near term (Hb less than 110 g/L and at least one additional laboratory indicators at 34 weeks' gestation or more) (ALL)**

Review: Daily oral iron supplementation during pregnancy

Comparison: 1 Any supplements containing iron versus same supplements without iron or no treatment/placebo (no iron or placebo)

Outcome: 65 Maternal iron-deficiency anaemia at or near term (Hb less than 110 g/L and at least one additional laboratory indicators at 34 weeks' gestation or more) (ALL)

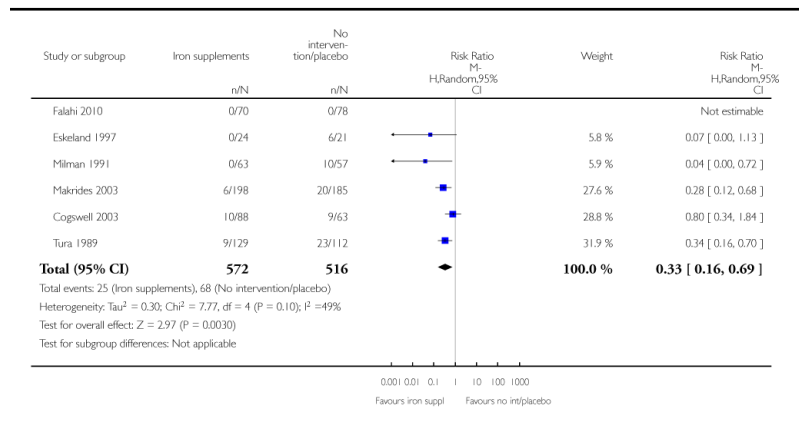

## Analysis 1.66. Comparison 1 Any supplements containing iron versus same supplements without iron or no treatment/placebo (no iron or placebo), Outcome 66 Maternal Hb concentration at or near term (in g/L, at 34 weeks' gestation or more) (ALL)

Review: Daily oral iron supplementation during pregnancy

Comparison: 1 Any supplements containing iron versus same supplements without iron or no treatment/placebo (no iron or placebo)

Outcome: 66 Maternal Hb concentration at or near term (in g/L, at 34 weeks' gestation or more) (ALL)

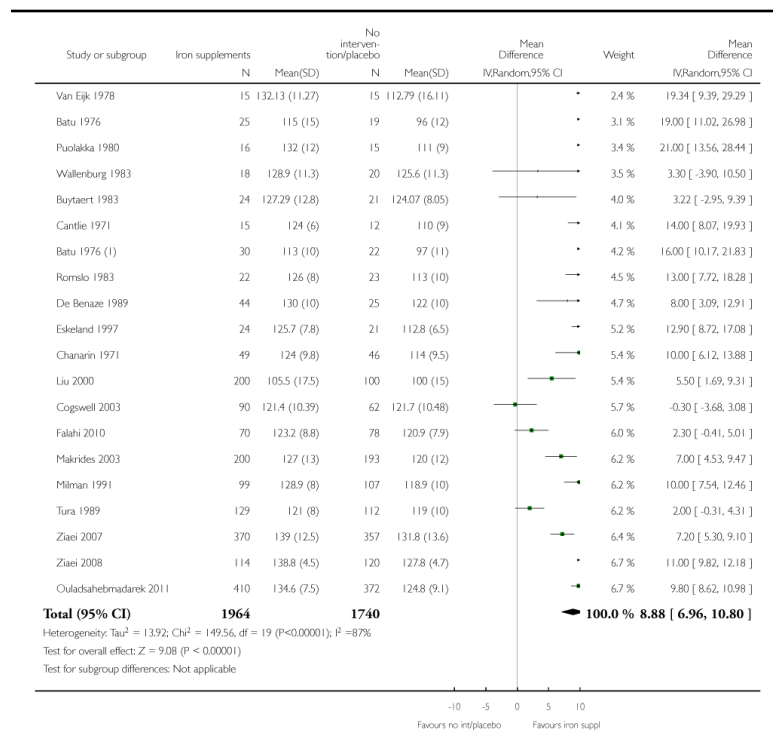

(1) We have treated this as two studies here as means were provided for several arms in this trial

## Analysis 1.67. Comparison 1 Any supplements containing iron versus same supplements without iron or no treatment/placebo (no iron or placebo), Outcome 67 Maternal Hb concentration within 6 wk postpartum (in g/L) (ALL)

Review: Daily oral iron supplementation during pregnancy

Comparison: 1 Any supplements containing iron versus same supplements without iron or no treatment/placebo (no iron or placebo)

Outcome: 67 Maternal Hb concentration within 6 wk postpartum (in g/L) (ALL)

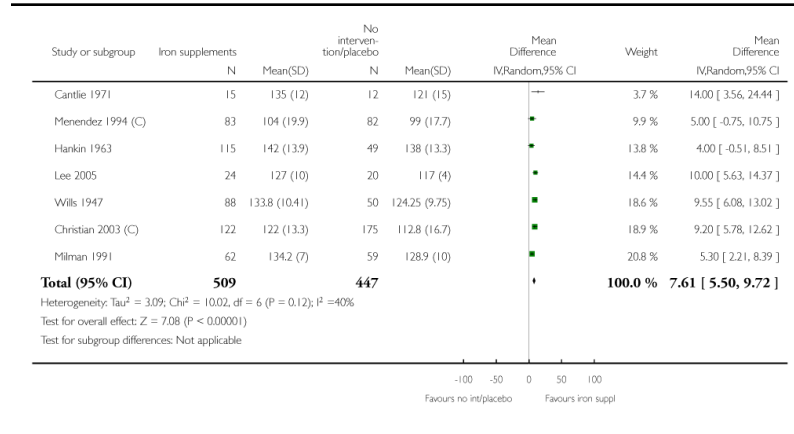

**Analysis 1.68. Comparison 1 Any supplements containing iron versus same supplements without iron or no treatment/placebo (no iron or placebo), Outcome 68 Maternal high haemoglobin concentrations during second or third trimester (Hb more than 130 g/L) (ALL)**

Review: Daily oral iron supplementation during pregnancy

Comparison: 1 Any supplements containing iron versus same supplements without iron or no treatment/placebo (no iron or placebo)

Outcome: 68 Maternal high haemoglobin concentrations during second or third trimester (Hb more than 130 g/L) (ALL)

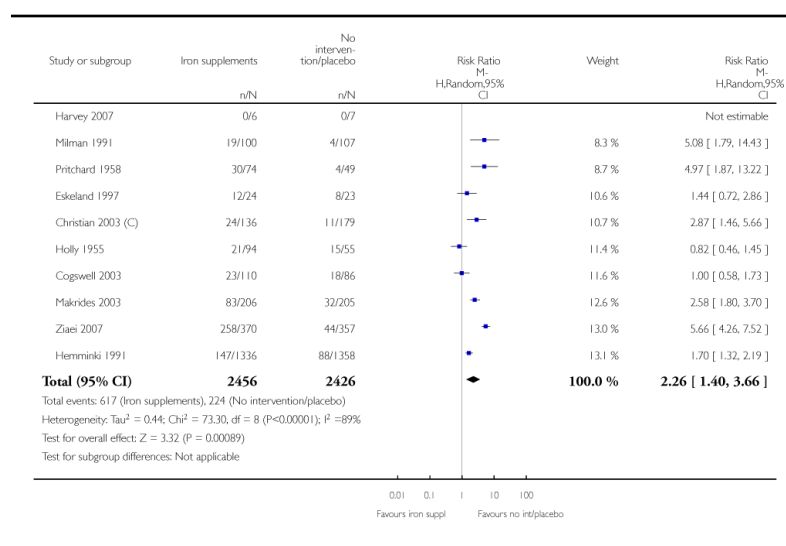

**Analysis 1.69. Comparison 1 Any supplements containing iron versus same supplements without iron or no treatment/placebo (no iron or placebo), Outcome 69 Maternal high haemoglobin concentrations at or near term (Hb more than 130 g/L at 34 weeks' gestation or more) (ALL)**

Review: Daily oral iron supplementation during pregnancy

Comparison: 1 Any supplements containing iron versus same supplements without iron or no treatment/placebo (no iron or placebo)

Outcome: 69 Maternal high haemoglobin concentrations at or near term (Hb more than 130 g/L at 34 weeks' gestation or more) (ALL)



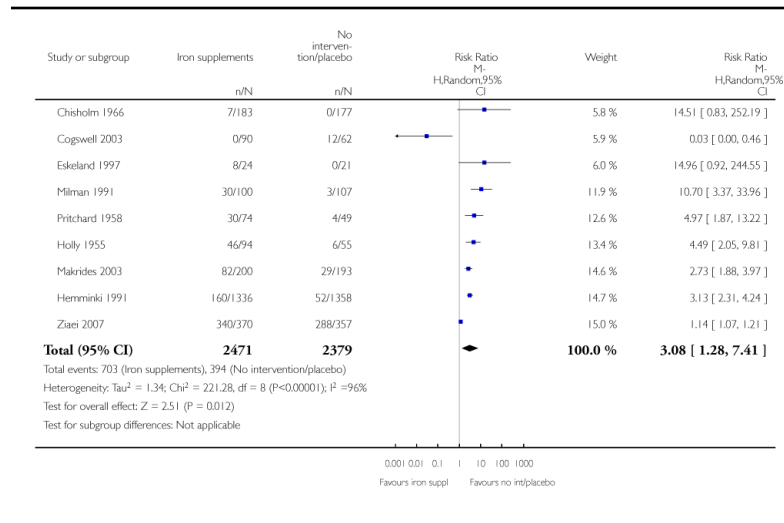

**Analysis 1.70. Comparison 1 Any supplements containing iron versus same supplements without iron or no treatment/placebo (no iron or placebo), Outcome 70 Maternal severe anaemia at or near term (Hb less than 70 g/L at 34 weeks' gestation or more) (ALL)**

Review: Daily oral iron supplementation during pregnancy

Comparison: 1 Any supplements containing iron versus same supplements without iron or no treatment/placebo (no iron or placebo)

Outcome: 70 Maternal severe anaemia at or near term (Hb less than 70 g/L at 34 weeks' gestation or more) (ALL)

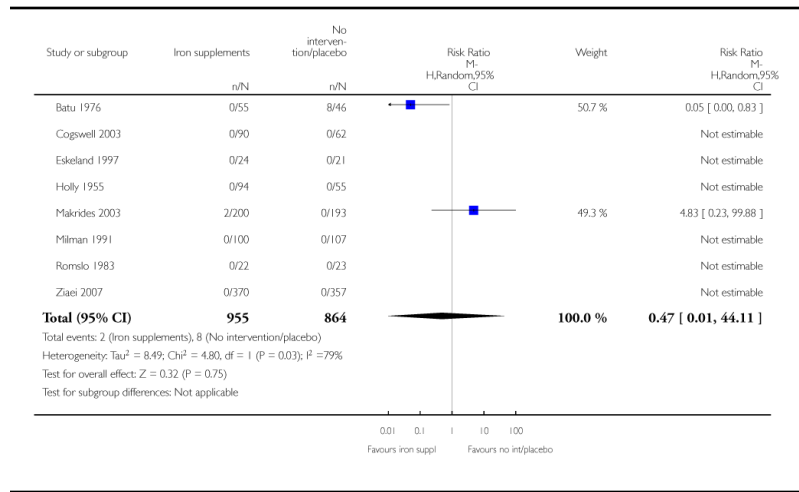

**Analysis 1.71. Comparison 1 Any supplements containing iron versus same supplements without iron or no treatment/placebo (no iron or placebo), Outcome 71 Severe anaemia at postpartum (Hb less than 80 g/L) (ALL)**

Review: Daily oral iron supplementation during pregnancy

Comparison: 1 Any supplements containing iron versus same supplements without iron or no treatment/placebo (no iron or placebo)

Outcome: 71 Severe anaemia at postpartum (Hb less than 80 g/L) (ALL)

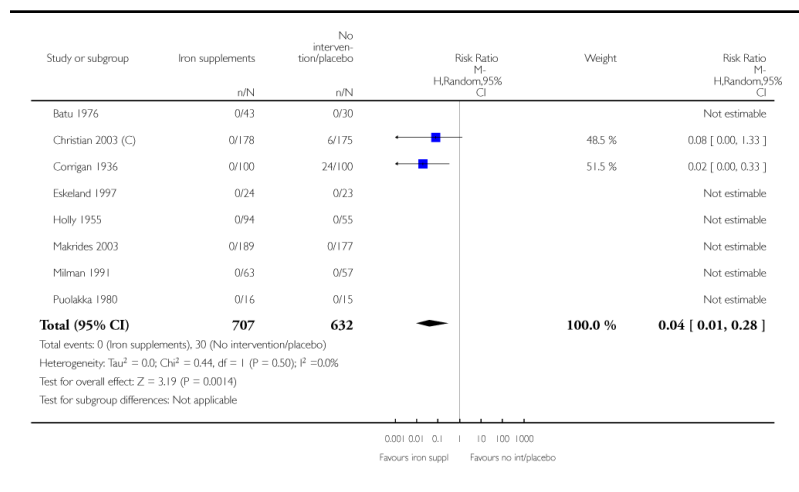

**Analysis 1.72. Comparison 1 Any supplements containing iron versus same supplements without iron or no treatment/placebo (no iron or placebo), Outcome 72 Moderate anaemia at postpartum (Hb more than 80 g/L and less than 110 g/L) (ALL)**

Review: Daily oral iron supplementation during pregnancy

Comparison: 1 Any supplements containing iron versus same supplements without iron or no treatment/placebo (no iron or placebo)

Outcome: 72 Moderate anaemia at postpartum (Hb more than 80 g/L and less than 110 g/L) (ALL)

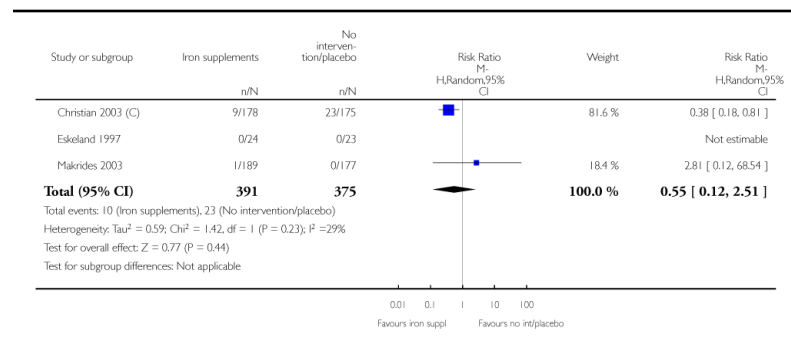

**Analysis 1.73. Comparison 1 Any supplements containing iron versus same supplements without iron or no treatment/placebo (no iron or placebo), Outcome 73 Puerperal infection (ALL)**

Review: Daily oral iron supplementation during pregnancy

Comparison: 1 Any supplements containing iron versus same supplements without iron or no treatment/placebo (no iron or placebo)

Outcome: 73 Puerperal infection (ALL)

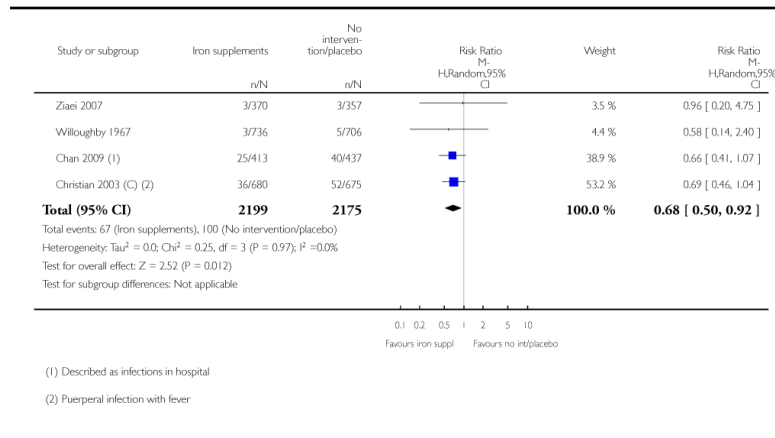

**Analysis 1.74. Comparison 1 Any supplements containing iron versus same supplements without iron or no treatment/placebo (no iron or placebo), Outcome 74 Antepartum haemorrhage (ALL)**

Review: Daily oral iron supplementation during pregnancy

Comparison: 1 Any supplements containing iron versus same supplements without iron or no treatment/placebo (no iron or placebo)

Outcome: 74 Antepartum haemorrhage (ALL)

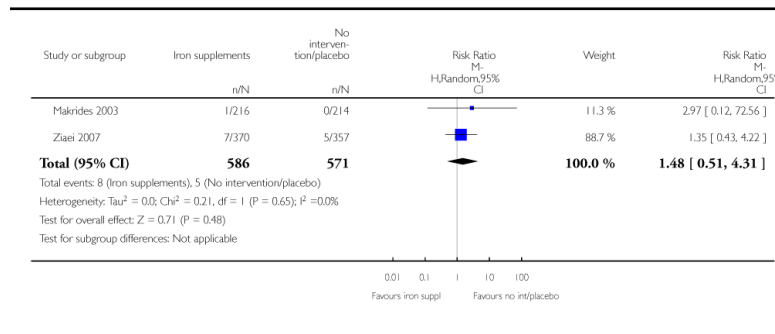

**Analysis 1.75. Comparison 1 Any supplements containing iron versus same supplements without iron or no treatment/placebo (no iron or placebo), Outcome 75 Postpartum haemorrhage (ALL)**

Review: Daily oral iron supplementation during pregnancy

Comparison: 1 Any supplements containing iron versus same supplements without iron or no treatment/placebo (no iron or placebo)

Outcome: 75 Postpartum haemorrhage (ALL)

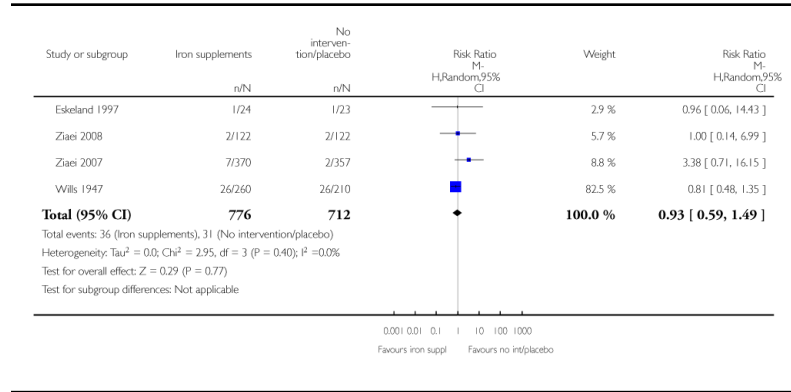

### Analysis 1.76. Comparison 1 Any supplements containing iron versus same supplements without iron or no treatment/placebo (no iron or placebo), Outcome 76 Transfusion provided (ALL)

Review: Daily oral iron supplementation during pregnancy

Comparison: 1 Any supplements containing iron versus same supplements without iron or no treatment/placebo (no iron or placebo)

Outcome: 76 Transfusion provided (ALL)

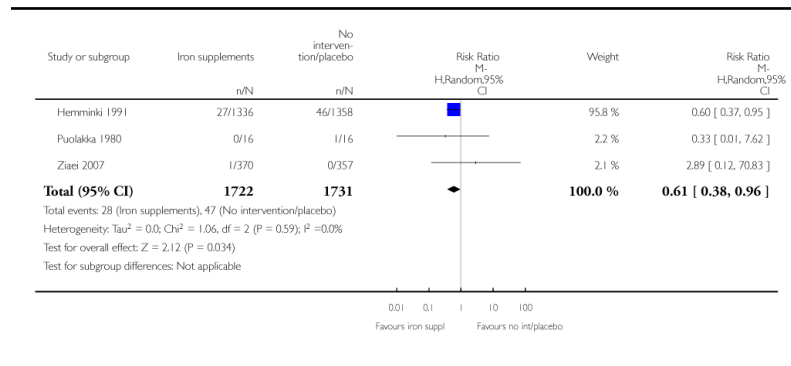

## Analysis 1.77. Comparison 1 Any supplements containing iron versus same supplements without iron or no treatment/placebo (no iron or placebo), Outcome 77 Diarrhoea (ALL)

Review: Daily oral iron supplementation during pregnancy

Comparison: 1 Any supplements containing iron versus same supplements without iron or no treatment/placebo (no iron or placebo)

Outcome: 77 Diarrhoea (ALL)

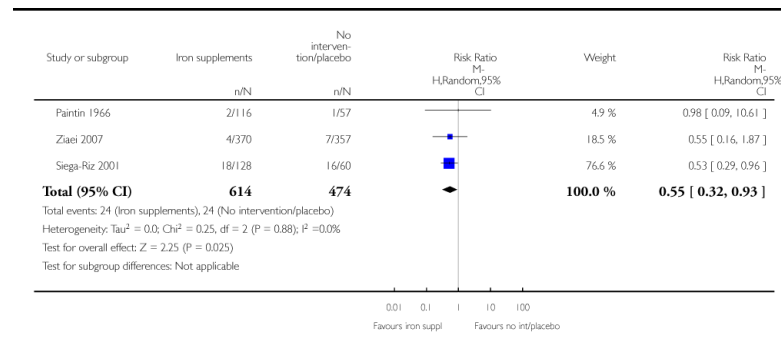

## Analysis 1.78. Comparison 1 Any supplements containing iron versus same supplements without iron or no treatment/placebo (no iron or placebo), Outcome 78 Constipation (ALL)

Review: Daily oral iron supplementation during pregnancy

Comparison: 1 Any supplements containing iron versus same supplements without iron or no treatment/placebo (no iron or placebo)

Outcome: 78 Constipation (ALL)

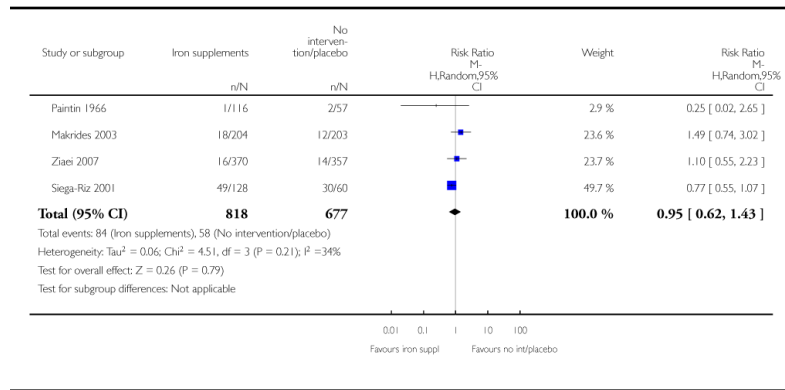

### Analysis 1.79. Comparison 1 Any supplements containing iron versus same supplements without iron or no treatment/placebo (no iron or placebo), Outcome 79 Nausea (ALL)

Review: Daily oral iron supplementation during pregnancy

Comparison: 1 Any supplements containing iron versus same supplements without iron or no treatment/placebo (no iron or placebo)

Outcome: 79 Nausea (ALL)

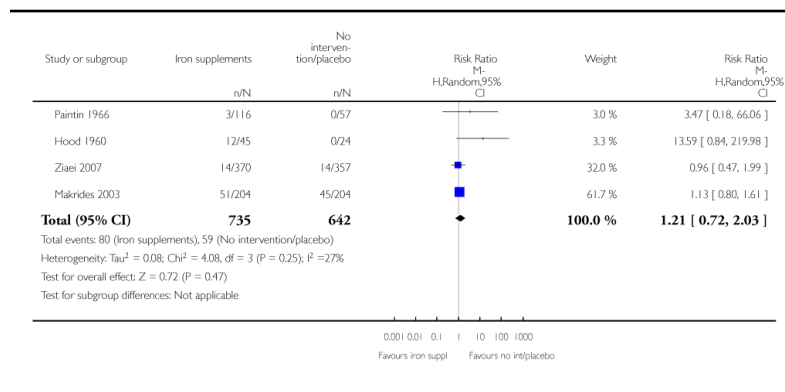

### Analysis 1.80. Comparison 1 Any supplements containing iron versus same supplements without iron or no treatment/placebo (no iron or placebo), Outcome 80 Heartburn (ALL)

Review: Daily oral iron supplementation during pregnancy

Comparison: 1 Any supplements containing iron versus same supplements without iron or no treatment/placebo (no iron or placebo)

Outcome: 80 Heartburn (ALL)

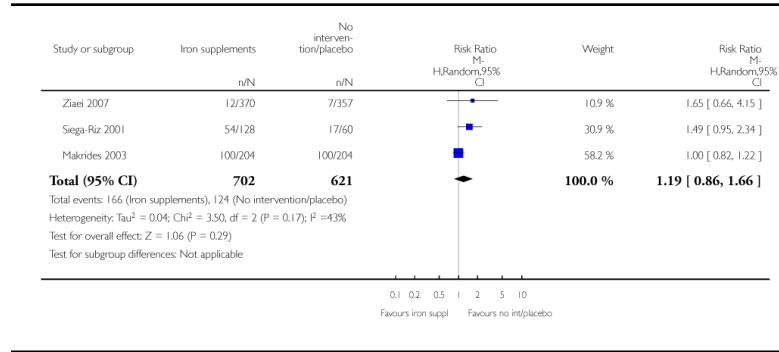

### Analysis 1.81. Comparison 1 Any supplements containing iron versus same supplements without iron or no treatment/placebo (no iron or placebo), Outcome 81 Vomiting (ALL)

Review: Daily oral iron supplementation during pregnancy

Comparison: 1 Any supplements containing iron versus same supplements without iron or no treatment/placebo (no iron or placebo)

Outcome: 81 Vomiting (ALL)

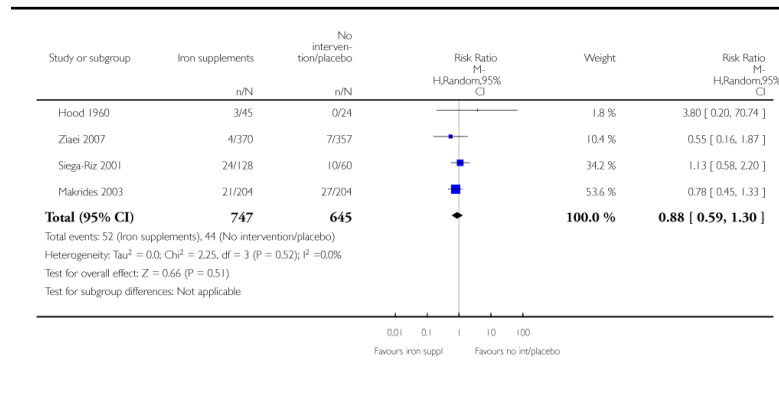



## Analysis 1.82. Comparison 1 Any supplements containing iron versus same supplements without iron or no treatment/placebo (no iron or placebo), Outcome 82 Maternal wellbeing/satisfaction (ALL)

Review: Daily oral iron supplementation during pregnancy

Comparison: 1 Any supplements containing iron versus same supplements without iron or no treatment/placebo (no iron or placebo)

Outcome: 82 Maternal wellbeing/satisfaction (ALL)

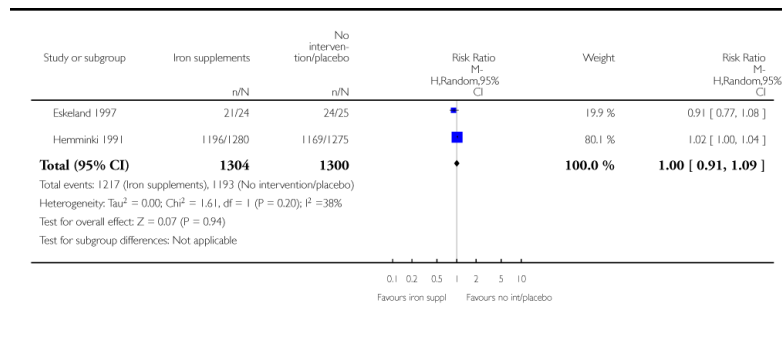

## Analysis 1.83. Comparison 1 Any supplements containing iron versus same supplements without iron or no treatment/placebo (no iron or placebo), Outcome 83 Placental abruption (ALL)

Review: Daily oral iron supplementation during pregnancy

Comparison: 1 Any supplements containing iron versus same supplements without iron or no treatment/placebo (no iron or placebo)

Outcome: 83 Placental abruption (ALL)

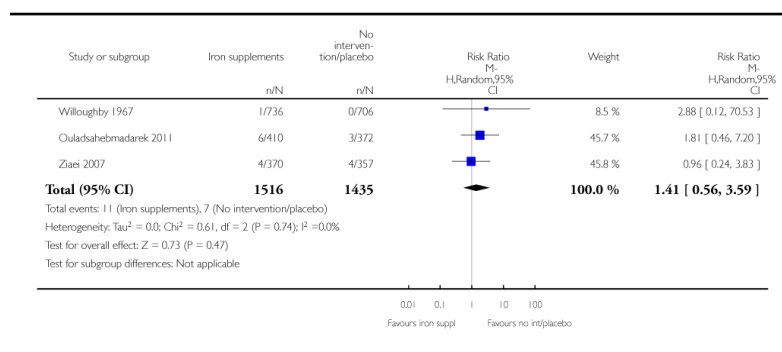

## Analysis 1.84. Comparison 1 Any supplements containing iron versus same supplements without iron or no treatment/placebo (no iron or placebo), Outcome 84 Premature rupture of membranes (ALL)

Review: Daily oral iron supplementation during pregnancy

Comparison: 1 Any supplements containing iron versus same supplements without iron or no treatment/placebo (no iron or placebo)

Outcome: 84 Premature rupture of membranes (ALL)

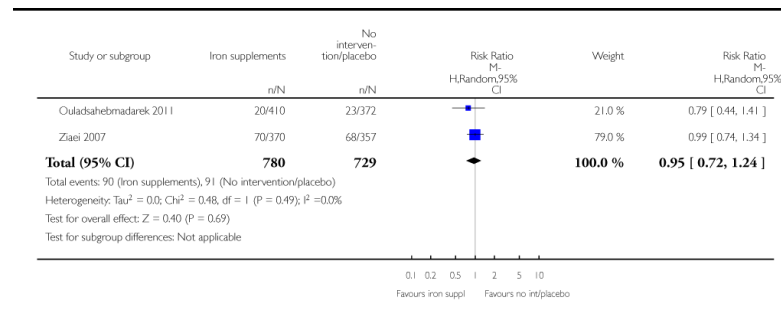

## Analysis 1.85. Comparison 1 Any supplements containing iron versus same supplements without iron or no treatment/placebo (no iron or placebo), Outcome 85 Pre-eclampsia (ALL)

Review: Daily oral iron supplementation during pregnancy

Comparison: 1 Any supplements containing iron versus same supplements without iron or no treatment/placebo (no iron or placebo)

Outcome: 85 Pre-eclampsia (ALL)

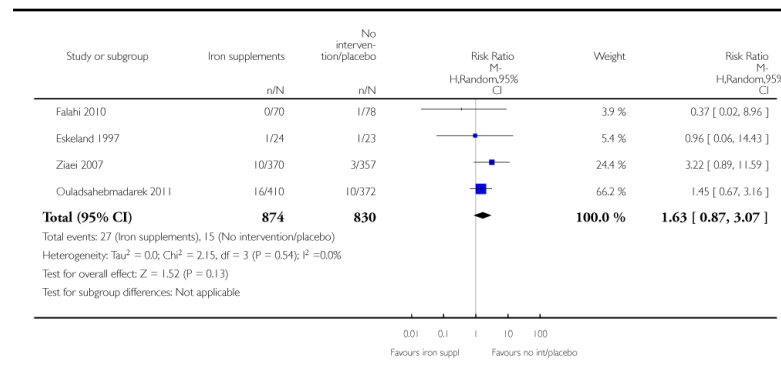

## Analysis 2.1. Comparison 2 Any supplements containing iron and folic acid versus same supplements without iron nor folic acid (no iron nor folic acid or placebo), Outcome 1 Low birthweight (less than 2500 g) (ALL)

Review: Daily oral iron supplementation during pregnancy

Comparison: 2 Any supplements containing iron and folic acid versus same supplements without iron nor folic acid (no iron nor folic acid or placebo)

Outcome: 1 Low birthweight (less than 2500 g) (ALL)

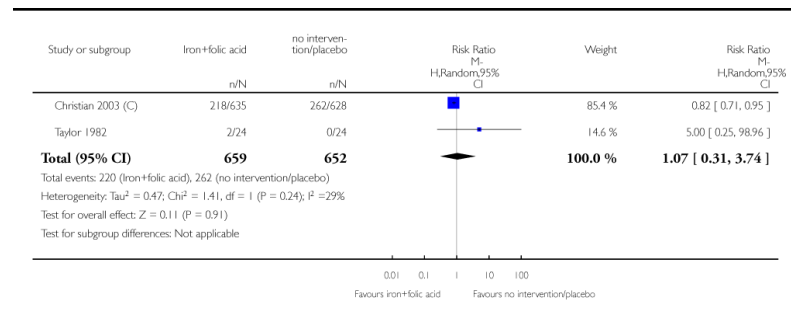

## Analysis 2.2. Comparison 2 Any supplements containing iron and folic acid versus same supplements without iron nor folic acid (no iron nor folic acid or placebo), Outcome 2 Birthweight (ALL)

Review: Daily oral iron supplementation during pregnancy

Comparison: 2 Any supplements containing iron and folic acid versus same supplements without iron nor folic acid (no iron nor folic acid or placebo)

Outcome: 2 Birthweight (ALL)

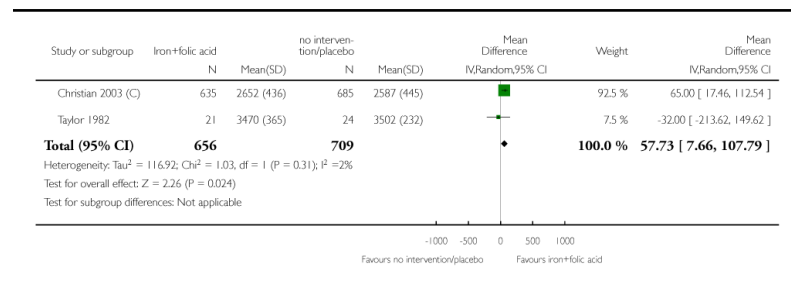

**Analysis 2.3. Comparison 2 Any supplements containing iron and folic acid versus same supplements without iron nor folic acid (no iron nor folic acid or placebo), Outcome 3 Premature birth (less than 37 weeks of gestation) (ALL)**

Review: Daily oral iron supplementation during pregnancy

Comparison: 2 Any supplements containing iron and folic acid versus same supplements without iron nor folic acid (no iron nor folic acid or placebo)

Outcome: 3 Premature birth (less than 37 weeks of gestation) (ALL)

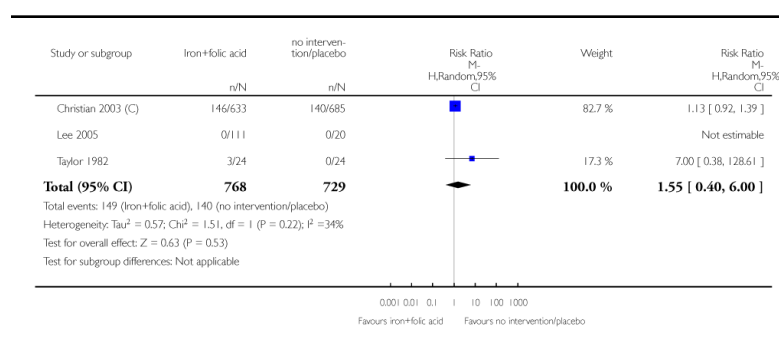

**Analysis 2.4. Comparison 2 Any supplements containing iron and folic acid versus same supplements without iron nor folic acid (no iron nor folic acid or placebo), Outcome 4 Premature birth (less than 37 weeks of gestation): SUBGROUP ANALYSIS by gestation at the start of supplementation.**

Review: Daily oral iron supplementation during pregnancy

Comparison: 2 Any supplements containing iron and folic acid versus same supplements without iron nor folic acid (no iron nor folic acid or placebo)

Outcome: 4 Premature birth (less than 37 weeks of gestation): SUBGROUP ANALYSIS by gestation at the start of supplementation

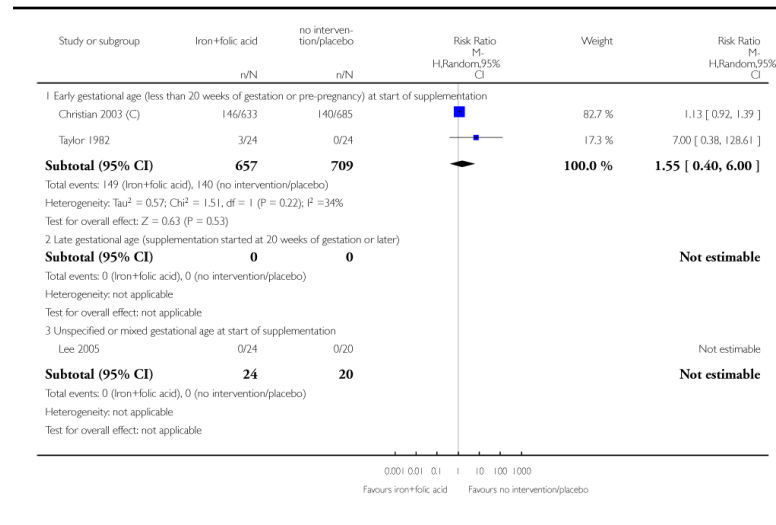

**Analysis 2.5. Comparison 2 Any supplements containing iron and folic acid versus same supplements without iron nor folic acid (no iron nor folic acid or placebo), Outcome 5 Premature birth (less than 37 weeks of gestation): SUBGROUP ANALYSIS by anaemia status at the start of supplementation.**

Review: Daily oral iron supplementation during pregnancy

Comparison: 2 Any supplements containing iron and folic acid versus same supplements without iron nor folic acid (no iron nor folic acid or placebo)

Outcome: 5 Premature birth (less than 37 weeks of gestation): SUBGROUP ANALYSIS by anaemia status at the start of supplementation

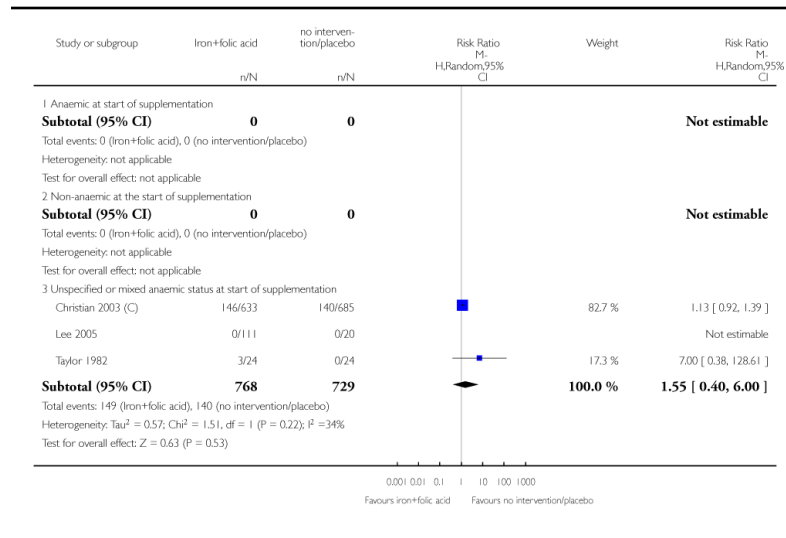

**Analysis 2.6. Comparison 2 Any supplements containing iron and folic acid versus same supplements without iron nor folic acid (no iron nor folic acid or placebo), Outcome 6 Premature birth (less than 37 weeks of gestation): SUBGROUP ANALYSIS by dose of iron.**

Review: Daily oral iron supplementation during pregnancy

Comparison: 2 Any supplements containing iron and folic acid versus same supplements without iron nor folic acid (no iron nor folic acid or placebo)

Outcome: 6 Premature birth (less than 37 weeks of gestation): SUBGROUP ANALYSIS by dose of iron

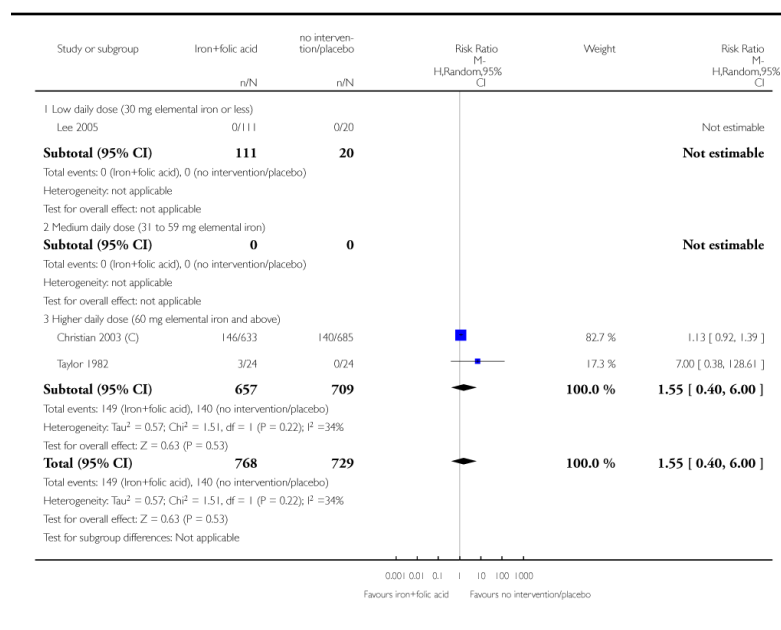

**Analysis 2.7. Comparison 2 Any supplements containing iron and folic acid versus same supplements without iron nor folic acid (no iron nor folic acid or placebo), Outcome 7 Premature birth (less than 37 weeks of gestation): SUBGROUP ANALYSIS by malarial status of settings.**

Review: Daily oral iron supplementation during pregnancy

Comparison: 2 Any supplements containing iron and folic acid versus same supplements without iron nor folic acid (no iron nor folic acid or placebo)

Outcome: 7 Premature birth (less than 37 weeks of gestation): SUBGROUP ANALYSIS by malarial status of settings

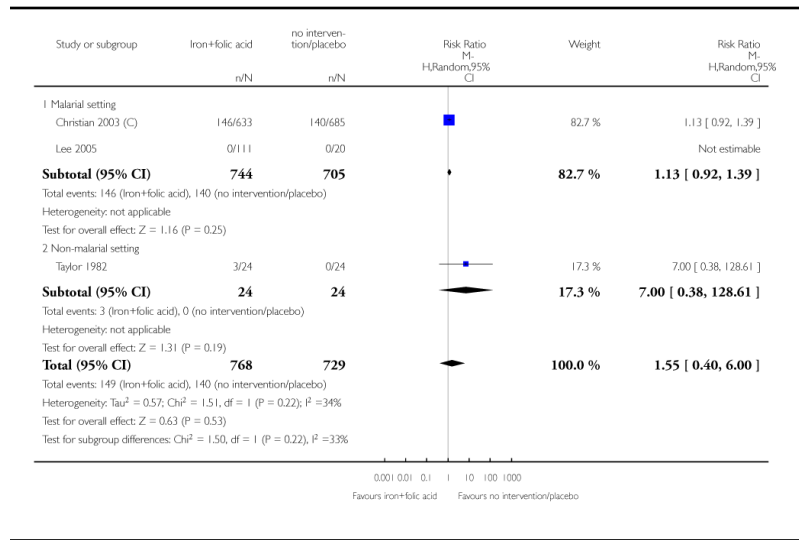

**Analysis 2.8. Comparison 2 Any supplements containing iron and folic acid versus same supplements without iron nor folic acid (no iron nor folic acid or placebo), Outcome 8 Neonatal death (within 28 days after delivery) (ALL)**

Review: Daily oral iron supplementation during pregnancy

Comparison: 2 Any supplements containing iron and folic acid versus same supplements without iron nor folic acid (no iron nor folic acid or placebo)

Outcome: 8 Neonatal death (within 28 days after delivery) (ALL)

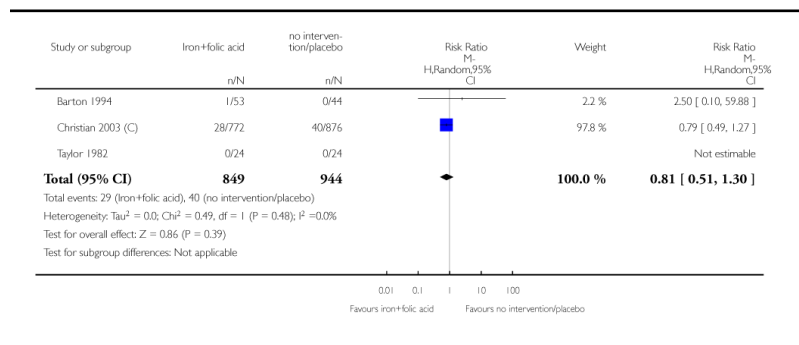

**Analysis 2.9. Comparison 2 Any supplements containing iron and folic acid versus same supplements without iron nor folic acid (no iron nor folic acid or placebo), Outcome 8 Neonatal death (within 28 days after delivery) (ALL)**



**or placebo), Outcome 9 Neonatal death (within 28 days after delivery):  
SUBGROUP ANALYSIS by gestation at the start of supplementation.**

Review: Daily oral iron supplementation during pregnancy

Comparison: 2 Any supplements containing iron and folic acid versus same supplements without iron nor folic acid (no iron nor folic acid or placebo)

Outcome: 9 Neonatal death (within 28 days after delivery): SUBGROUP ANALYSIS by gestation at the start of supplementation

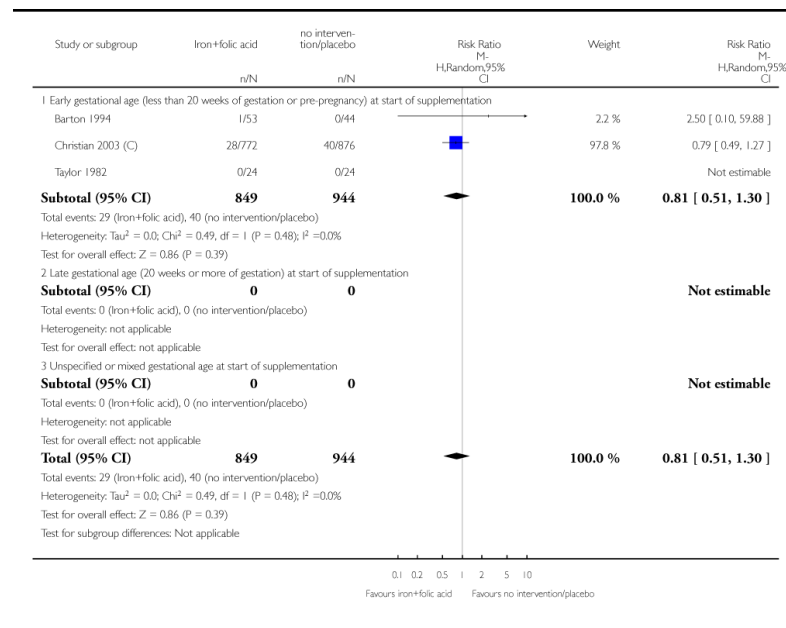

**Analysis 2.10. Comparison 2 Any supplements containing iron and folic acid versus same supplements without iron nor folic acid (no iron nor folic acid or placebo), Outcome 10 Neonatal death (within 28 days after delivery): SUBGROUP ANALYSIS by anaemia status at the start of supplementation.**

Review: Daily oral iron supplementation during pregnancy

Comparison: 2 Any supplements containing iron and folic acid versus same supplements without iron nor folic acid (no iron nor folic acid or placebo)

Outcome: 10 Neonatal death (within 28 days after delivery): SUBGROUP ANALYSIS by anaemia status at the start of supplementation

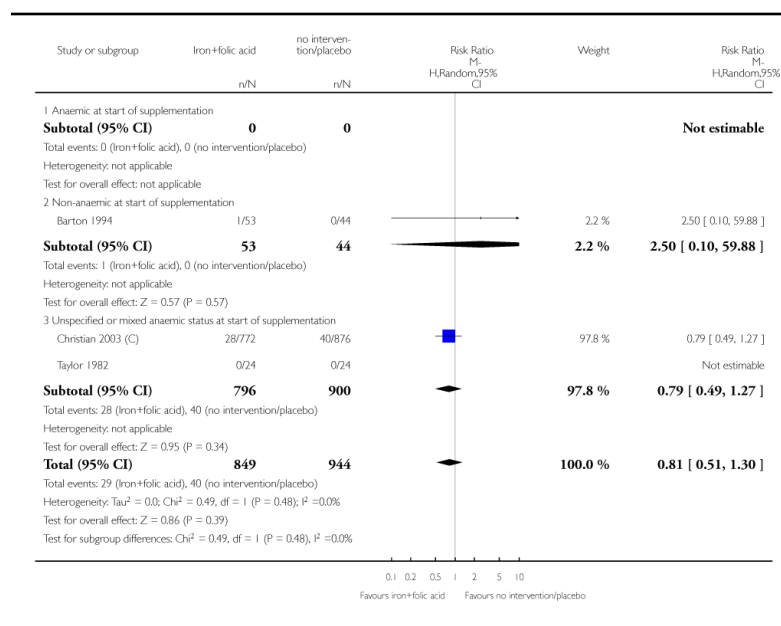

**Analysis 2.11. Comparison 2 Any supplements containing iron and folic acid versus same supplements without iron nor folic acid (no iron nor folic acid or placebo), Outcome 11 Neonatal death (within 28 days after delivery): SUBGROUP ANALYSIS by dose of iron.**

Review: Daily oral iron supplementation during pregnancy

Comparison: 2 Any supplements containing iron and folic acid versus same supplements without iron nor folic acid (no iron nor folic acid or placebo)

Outcome: 11 Neonatal death (within 28 days after delivery): SUBGROUP ANALYSIS by dose of iron

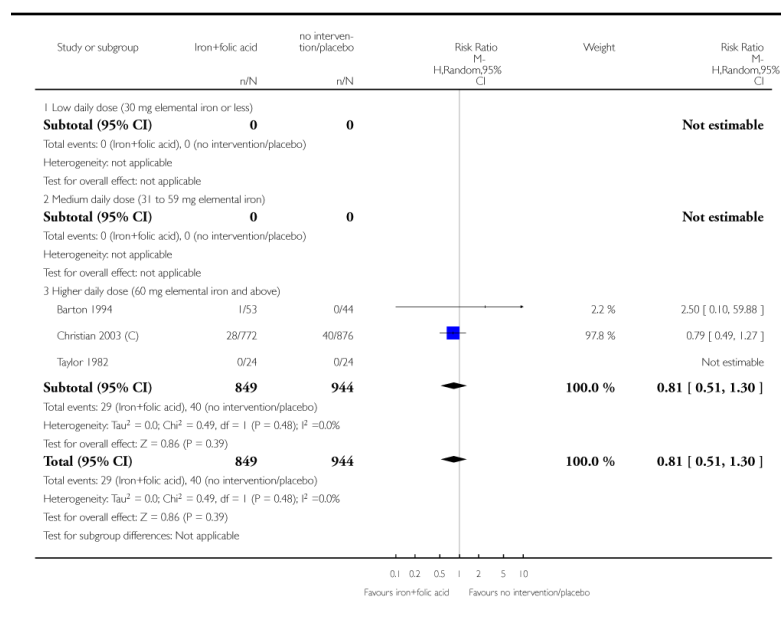

**Analysis 2.12. Comparison 2 Any supplements containing iron and folic acid versus same supplements without iron nor folic acid (no iron nor folic acid or placebo), Outcome 12 Neonatal death (within 28 days after delivery): SUBGROUP ANALYSIS by malarial status at the start of supplementation.**

Review: Daily oral iron supplementation during pregnancy

Comparison: 2 Any supplements containing iron and folic acid versus same supplements without iron nor folic acid (no iron nor folic acid or placebo)

Outcome: 12 Neonatal death (within 28 days after delivery): SUBGROUP ANALYSIS by malarial status at the start of supplementation

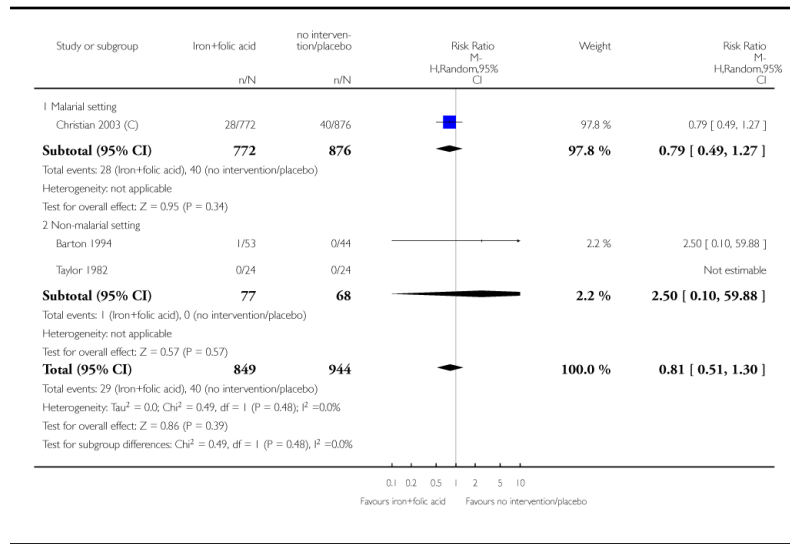

**Analysis 2.13. Comparison 2 Any supplements containing iron and folic acid versus same supplements without iron nor folic acid (no iron nor folic acid or placebo), Outcome 13 Congenital anomalies (ALL)**

Review: Daily oral iron supplementation during pregnancy

Comparison: 2 Any supplements containing iron and folic acid versus same supplements without iron nor folic acid (no iron nor folic acid or placebo)

Outcome: 13 Congenital anomalies (ALL)

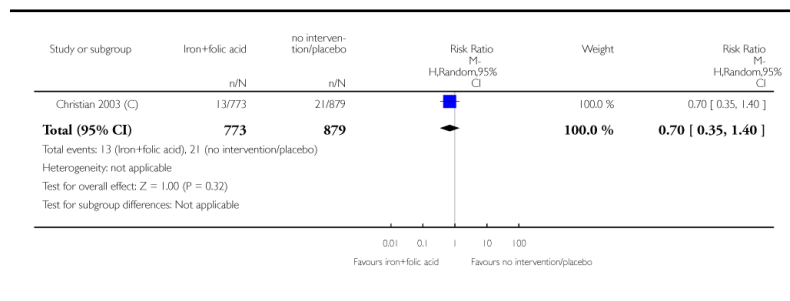

**Analysis 2.14. Comparison 2 Any supplements containing iron and folic acid versus same supplements without iron nor folic acid (no iron nor folic acid or placebo), Outcome 13 Congenital anomalies (ALL)**

## acid or placebo), Outcome 14 Maternal anaemia at term (Hb less than 110 g/L at 37 weeks' gestation or more) (ALL)

Review: Daily oral iron supplementation during pregnancy

Comparison: 2 Any supplements containing iron and folic acid versus same supplements without iron nor folic acid (no iron nor folic acid or placebo)

Outcome: 14 Maternal anaemia at term (Hb less than 110 g/L at 37 weeks' gestation or more) (ALL)

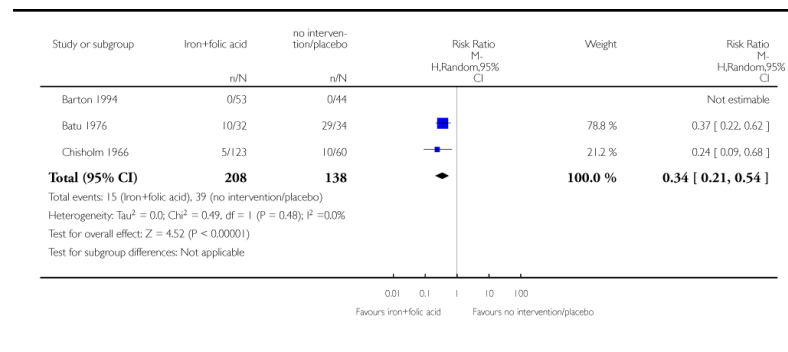

## Analysis 2.15. Comparison 2 Any supplements containing iron and folic acid versus same supplements without iron nor folic acid (no iron nor folic acid or placebo), Outcome 15 Maternal anaemia at term (Hb less than 110 g/L at 37 weeks' gestation or more): SUBGROUP ANALYSIS by gestation at the start of supplementation.

Review: Daily oral iron supplementation during pregnancy

Comparison: 2 Any supplements containing iron and folic acid versus same supplements without iron nor folic acid (no iron nor folic acid or placebo)

Outcome: 15 Maternal anaemia at term (Hb less than 110 g/L at 37 weeks' gestation or more): SUBGROUP ANALYSIS by gestation at the start of supplementation

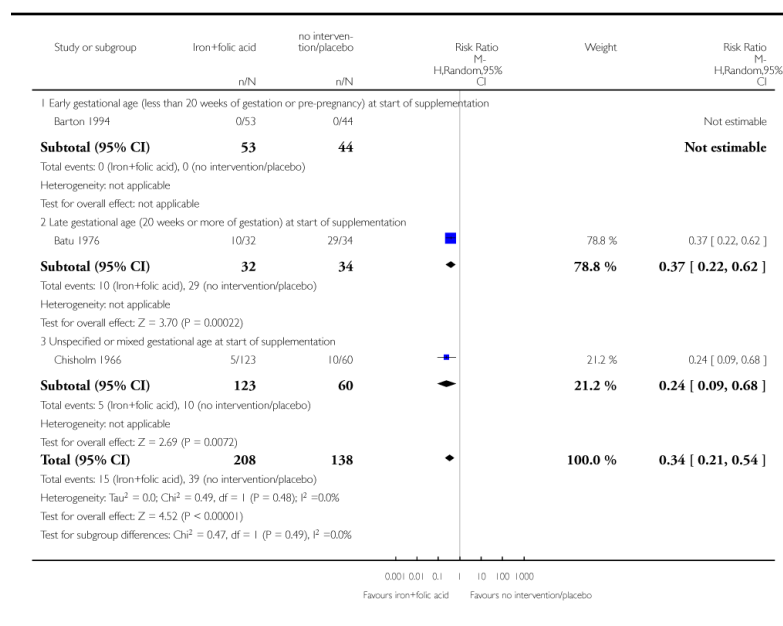

**Analysis 2.16. Comparison 2 Any supplements containing iron and folic acid versus same supplementations without iron nor folic acid (no iron nor folic acid or placebo), Outcome 16 Maternal anaemia at term (Hb less than 110 g/L at 37 weeks' gestation or more): SUBGROUP ANALYSIS by anaemia status at the start of supplementation.**

Review: Daily oral iron supplementation during pregnancy

Comparison: 2 Any supplements containing iron and folic acid versus same supplementations without iron nor folic acid (no iron nor folic acid or placebo)

Outcome: 16 Maternal anaemia at term (Hb less than 110 g/L at 37 weeks' gestation or more): SUBGROUP ANALYSIS by anaemia status at the start of supplementation

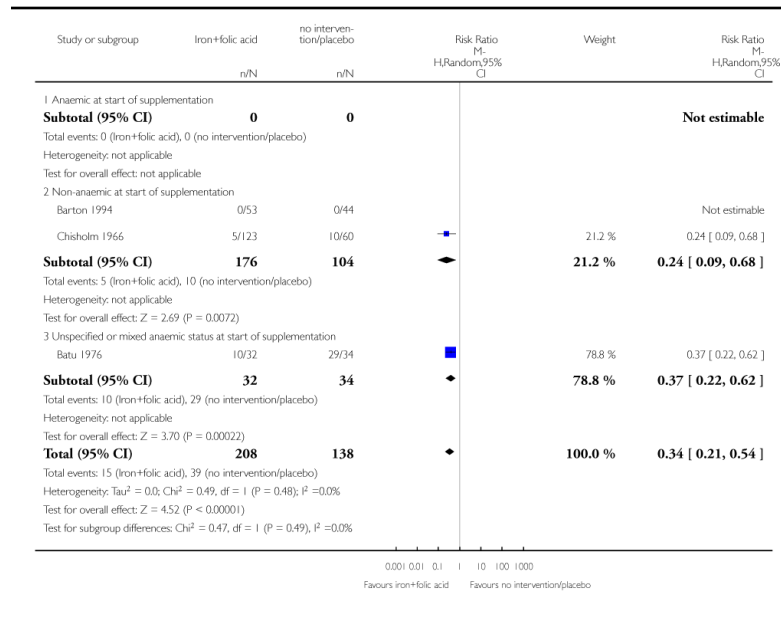

**Analysis 2.17. Comparison 2 Any supplements containing iron and folic acid versus same supplements without iron nor folic acid (no iron nor folic acid or placebo), Outcome 17 Maternal anaemia at term (Hb less than 110 g/L at 37 weeks' gestation or more): SUBGROUP ANALYSIS by dose of iron.**

Review: Daily oral iron supplementation during pregnancy

Comparison: 2 Any supplements containing iron and folic acid versus same supplements without iron nor folic acid (no iron nor folic acid or placebo)

Outcome: 17 Maternal anaemia at term (Hb less than 110 g/L at 37 weeks' gestation or more): SUBGROUP ANALYSIS by dose of iron

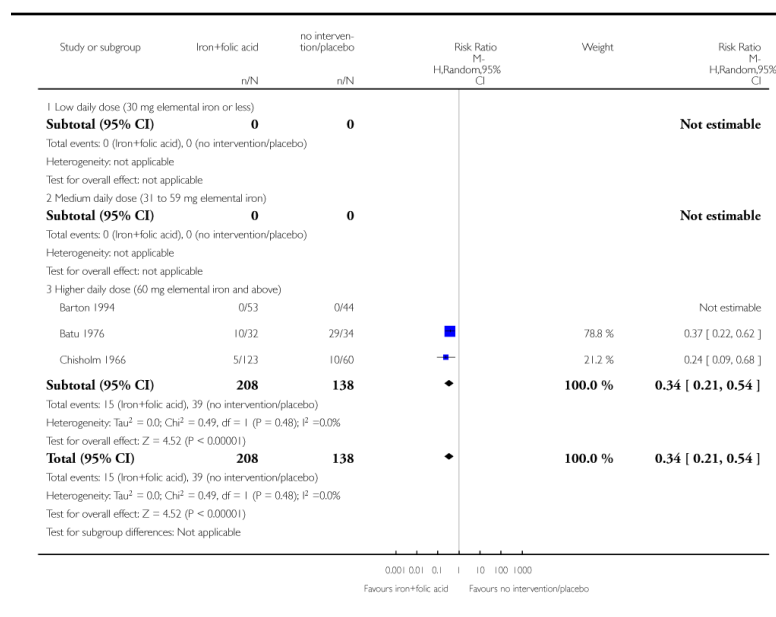

**Analysis 2.18. Comparison 2 Any supplements containing iron and folic acid versus same supplements without iron nor folic acid (no iron nor folic acid or placebo), Outcome 18 Maternal anaemia at term (Hb less than 110 g/L at 37 weeks' gestation or more): SUBGROUP ANALYSIS by malarial status of setting.**

Review: Daily oral iron supplementation during pregnancy

Comparison: 2 Any supplements containing iron and folic acid versus same supplements without iron nor folic acid (no iron nor folic acid or placebo)

Outcome: 18 Maternal anaemia at term (Hb less than 110 g/L at 37 weeks' gestation or more): SUBGROUP ANALYSIS by malarial status of setting



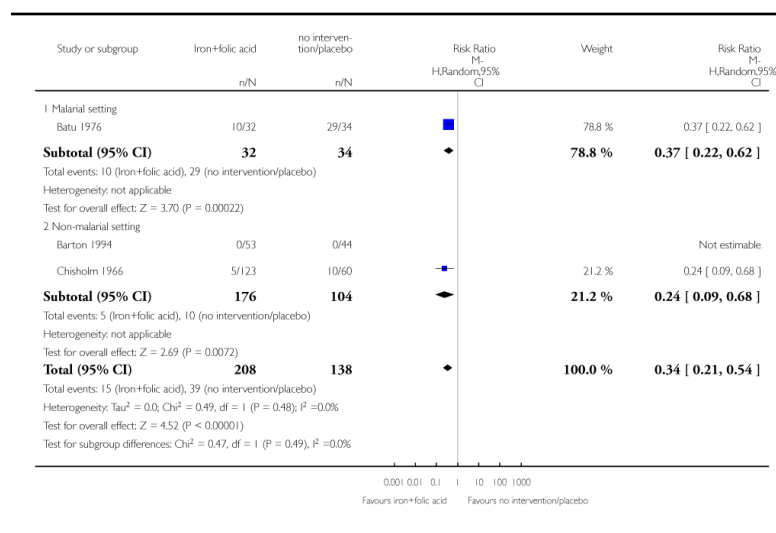

**Analysis 2.19. Comparison 2 Any supplements containing iron and folic acid versus same supplements without iron nor folic acid (no iron nor folic acid or placebo), Outcome 19 Maternal iron deficiency at term (as defined by trialists, based on any indicator of iron status at 37 weeks' gestation or more) (ALL)**

Review: Daily oral iron supplementation during pregnancy

Comparison: 2 Any supplements containing iron and folic acid versus same supplements without iron nor folic acid (no iron nor folic acid or placebo)

Outcome: 19 Maternal iron deficiency at term (as defined by trialists, based on any indicator of iron status at 37 weeks' gestation or more) (ALL)

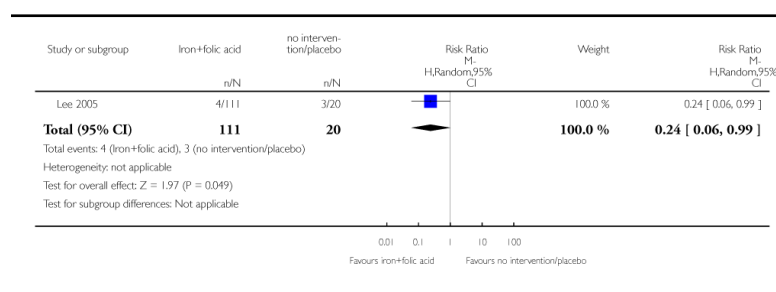

**Analysis 2.20. Comparison 2 Any supplements containing iron and folic acid versus same supplements without iron nor folic acid (no iron nor folic**

**acid or placebo), Outcome 20 Maternal iron deficiency anaemia at term (Hb less than 110 g/L and at least one additional laboratory indicators at 37 weeks' gestation or more) (ALL)**

Review: Daily oral iron supplementation during pregnancy

Comparison: 2 Any supplements containing iron and folic acid versus same supplements without iron nor folic acid (no iron nor folic acid or placebo)

Outcome: 20 Maternal iron deficiency anaemia at term (Hb less than 110 g/L and at least one additional laboratory indicators at 37 weeks' gestation or more) (ALL)

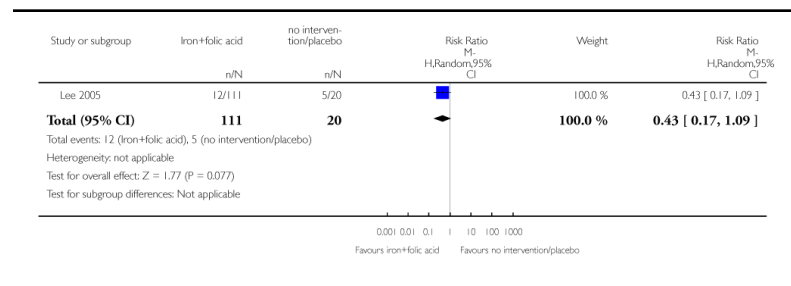

**Analysis 2.21. Comparison 2 Any supplements containing iron and folic acid versus same supplements without iron nor folic acid (no iron nor folic acid or placebo), Outcome 21 Maternal death (death while pregnant or within 42 days of termination of pregnancy) (ALL)**

Review: Daily oral iron supplementation during pregnancy

Comparison: 2 Any supplements containing iron and folic acid versus same supplements without iron nor folic acid (no iron nor folic acid or placebo)

Outcome: 21 Maternal death (death while pregnant or within 42 days of termination of pregnancy) (ALL)

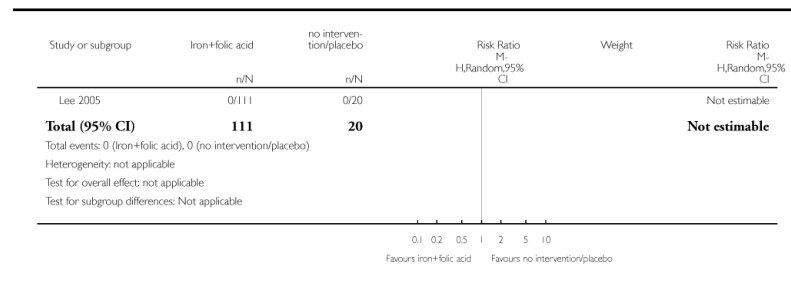

**Analysis 2.22. Comparison 2 Any supplements containing iron and folic acid versus same supplements without iron nor folic acid (no iron nor folic acid or placebo), Outcome 22 Side effects (any reported throughout the intervention period) (ALL)**

Review: Daily oral iron supplementation during pregnancy

Comparison: 2 Any supplements containing iron and folic acid versus same supplements without iron nor folic acid (no iron nor folic acid or placebo)

Outcome: 22 Side effects (any reported throughout the intervention period) (ALL)

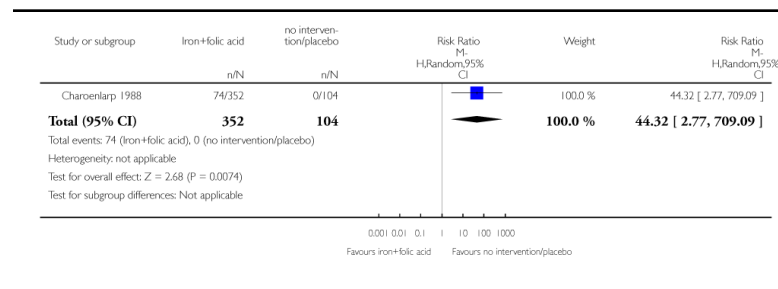

**Analysis 2.23. Comparison 2 Any supplements containing iron and folic acid versus same supplements without iron nor folic acid (no iron nor folic acid or placebo), Outcome 23 Maternal severe anaemia at any time during second and third trimester (Hb less than 70 g/L) (ALL)**

Review: Daily oral iron supplementation during pregnancy

Comparison: 2 Any supplements containing iron and folic acid versus same supplements without iron nor folic acid (no iron nor folic acid or placebo)

Outcome: 23 Maternal severe anaemia at any time during second and third trimester (Hb less than 70 g/L) (ALL)

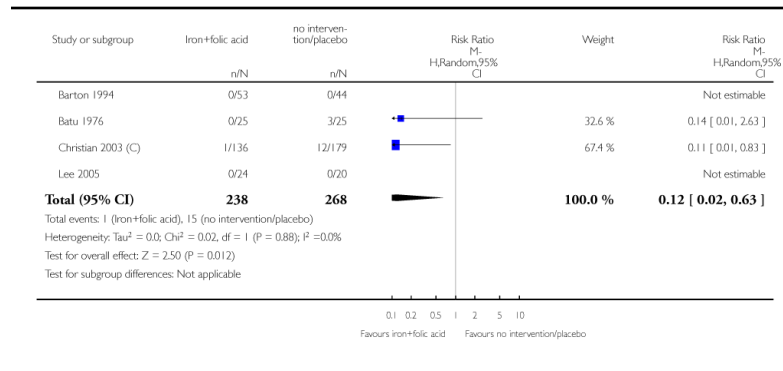

**Analysis 2.24. Comparison 2 Any supplements containing iron and folic acid versus same supplements without iron nor folic acid (no iron nor folic acid or placebo), Outcome 24 Maternal severe anaemia at any time during second and third trimester (Hb less than 70 g/L): SUBGROUP ANALYSIS by gestation at the start of supplementation.**

Review: Daily oral iron supplementation during pregnancy

Comparison: 2 Any supplements containing iron and folic acid versus same supplements without iron nor folic acid (no iron nor folic acid or placebo)

Outcome: 24 Maternal severe anaemia at any time during second and third trimester (Hb less than 70 g/L): SUBGROUP ANALYSIS by gestation at the start of supplementation

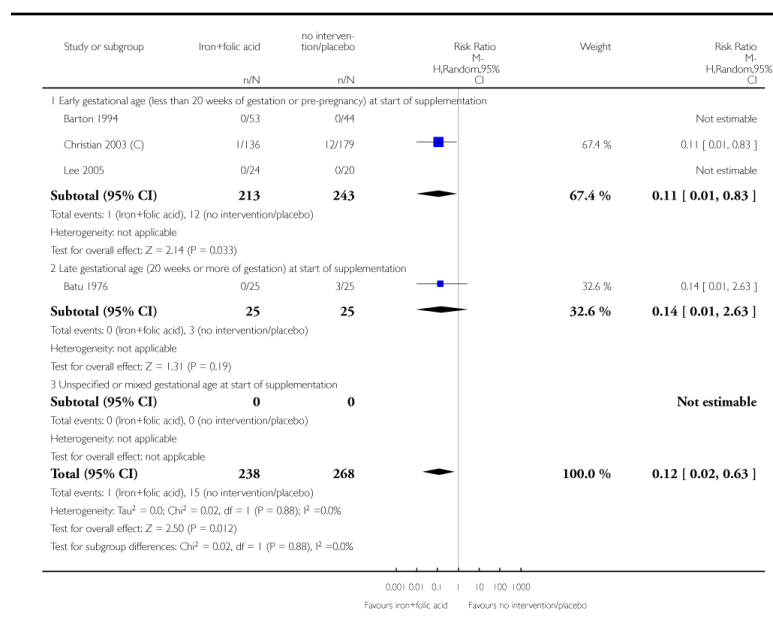

**Analysis 2.25. Comparison 2 Any supplements containing iron and folic acid versus same supplements without iron nor folic acid (no iron nor folic acid or placebo), Outcome 25 Maternal severe anaemia at any time during second and third trimester (Hb less than 70 g/L): SUBGROUP ANALYSIS by anaemia status at the start of supplementation.**

Review: Daily oral iron supplementation during pregnancy

Comparison: 2 Any supplements containing iron and folic acid versus same supplements without iron nor folic acid (no iron nor folic acid or placebo)

Outcome: 25 Maternal severe anaemia at any time during second and third trimester (Hb less than 70 g/L): SUBGROUP ANALYSIS by anaemia status at the start of supplementation

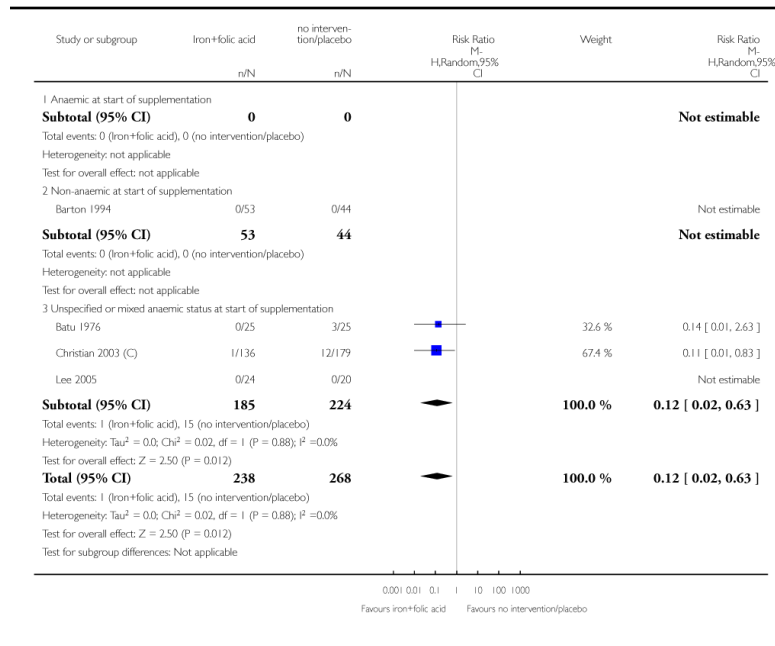

**Analysis 2.26. Comparison 2 Any supplements containing iron and folic acid versus same supplements without iron nor folic acid (no iron nor folic acid or placebo), Outcome 26 Maternal severe anaemia at any time during second and third trimester (Hb less than 70 g/L): SUBGROUP ANALYSIS by dose of iron.**

Review: Daily oral iron supplementation during pregnancy

Comparison: 2 Any supplements containing iron and folic acid versus same supplements without iron nor folic acid (no iron nor folic acid or placebo)

Outcome: 26 Maternal severe anaemia at any time during second and third trimester (Hb less than 70 g/L): SUBGROUP ANALYSIS by dose of iron

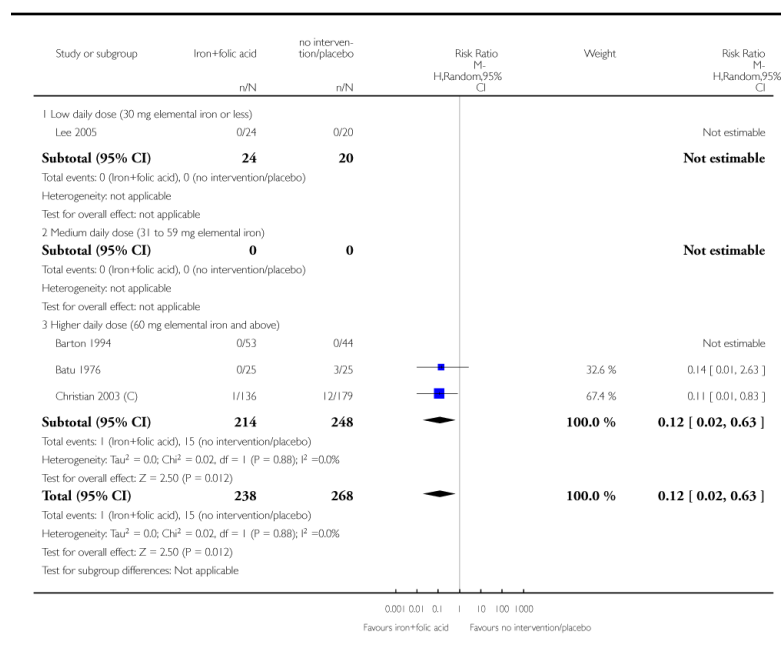

**Analysis 2.27. Comparison 2 Any supplements containing iron and folic acid versus same supplements without iron nor folic acid (no iron nor folic acid or placebo), Outcome 27 Maternal severe anaemia at any time during second and third trimester (Hb less than 70 g/L): SUBGROUP ANALYSIS by malarial status of setting.**

Review: Daily oral iron supplementation during pregnancy

Comparison: 2 Any supplements containing iron and folic acid versus same supplements without iron nor folic acid (no iron nor folic acid or placebo)

Outcome: 27 Maternal severe anaemia at any time during second and third trimester (Hb less than 70 g/L): SUBGROUP ANALYSIS by malarial status of setting

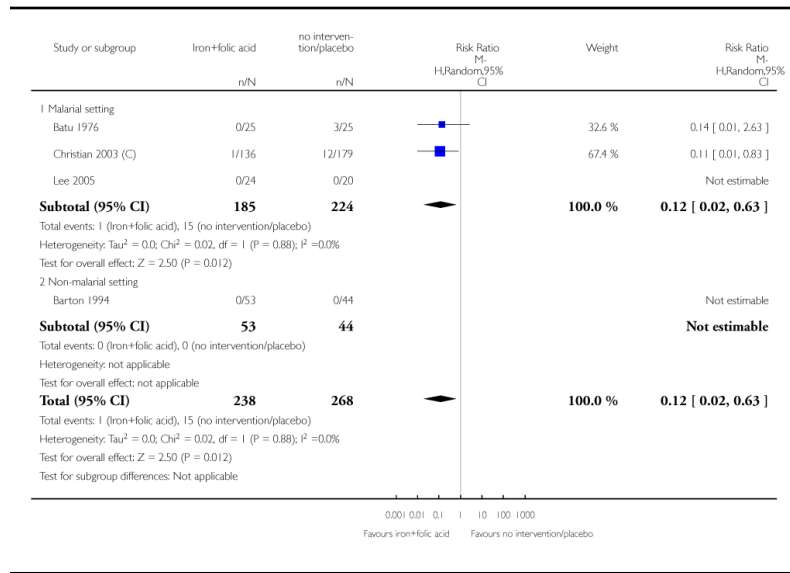

**Analysis 2.29. Comparison 2 Any supplements containing iron and folic acid versus same supplements without iron nor folic acid (no iron nor folic acid or placebo), Outcome 29 Infection during pregnancy (including urinary tract infections) (ALL)**

Review: Daily oral iron supplementation during pregnancy

Comparison: 2 Any supplements containing iron and folic acid versus same supplements without iron nor folic acid (no iron nor folic acid or placebo)

Outcome: 29 Infection during pregnancy (including urinary tract infections) (ALL)

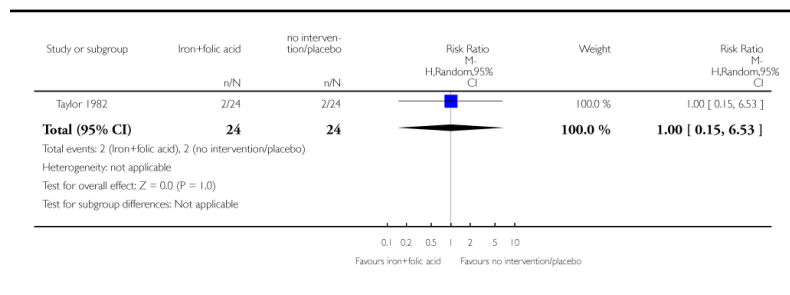



### Analysis 2.30. Comparison 2 Any supplements containing iron and folic acid versus same supplements without iron nor folic acid (no iron nor folic acid or placebo), Outcome 30 Very low birthweight (less than 1500 g) (ALL)

Review: Daily oral iron supplementation during pregnancy

Comparison: 2 Any supplements containing iron and folic acid versus same supplements without iron nor folic acid (no iron nor folic acid or placebo)

Outcome: 30 Very low birthweight (less than 1500 g) (ALL)

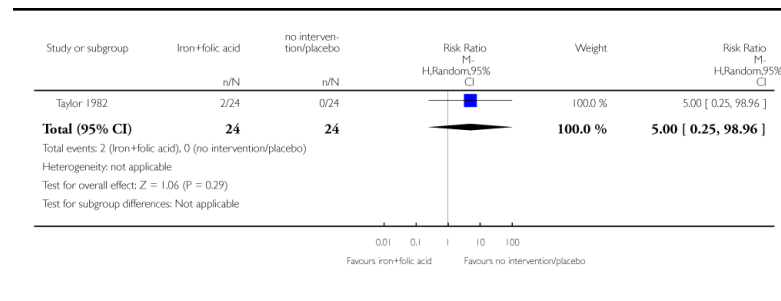

### Analysis 2.31. Comparison 2 Any supplements containing iron and folic acid versus same supplements without iron nor folic acid (no iron nor folic acid or placebo), Outcome 31 Very premature birth (less than 34 weeks' gestation) (ALL)

Review: Daily oral iron supplementation during pregnancy

Comparison: 2 Any supplements containing iron and folic acid versus same supplements without iron nor folic acid (no iron nor folic acid or placebo)

Outcome: 31 Very premature birth (less than 34 weeks' gestation) (ALL)

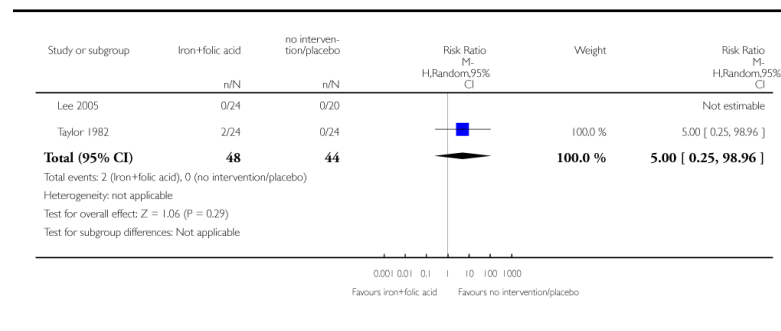

### Analysis 2.32. Comparison 2 Any supplements containing iron and folic acid versus same supplements without iron nor folic acid (no iron nor folic acid or placebo), Outcome 32 Admission to special care unit (ALL)

Review: Daily oral iron supplementation during pregnancy

Comparison: 2 Any supplements containing iron and folic acid versus same supplements without iron nor folic acid (no iron nor folic acid or placebo)

Outcome: 32 Admission to special care unit (ALL)

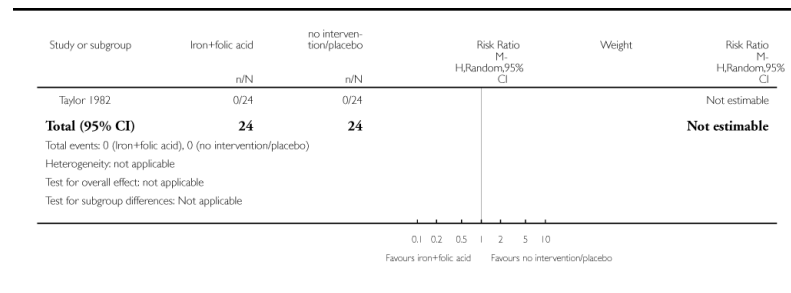

### Analysis 2.33. Comparison 2 Any supplements containing iron and folic acid versus same supplements without iron nor folic acid (no iron nor folic acid or placebo), Outcome 33 Maternal anaemia at or near term (Hb less than 110 g/L at 34 weeks' gestation or more) (ALL)

Review: Daily oral iron supplementation during pregnancy

Comparison: 2 Any supplements containing iron and folic acid versus same supplements without iron nor folic acid (no iron nor folic acid or placebo)

Outcome: 33 Maternal anaemia at or near term (Hb less than 110 g/L at 34 weeks' gestation or more) (ALL)

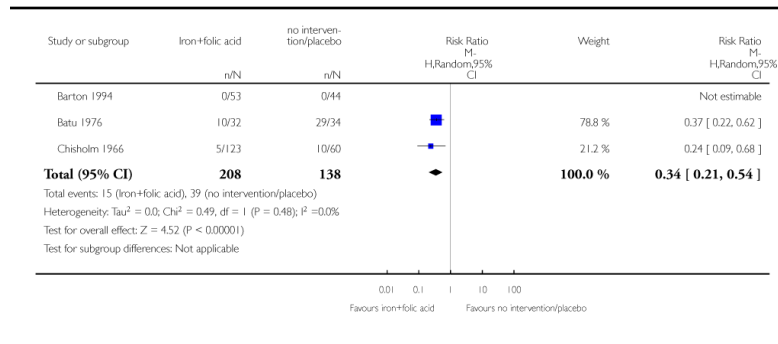

**Analysis 2.34. Comparison 2 Any supplements containing iron and folic acid versus same supplements without iron nor folic acid (no iron nor folic acid or placebo), Outcome 34 Maternal iron deficiency at or near term (as defined by trialists, based on any indicator of iron status at 34 weeks' gestation or more) (ALL)**

Review: Daily oral iron supplementation during pregnancy

Comparison: 2 Any supplements containing iron and folic acid versus same supplements without iron nor folic acid (no iron nor folic acid or placebo)

Outcome: 34 Maternal iron deficiency at or near term (as defined by trialists, based on any indicator of iron status at 34 weeks' gestation or more) (ALL)

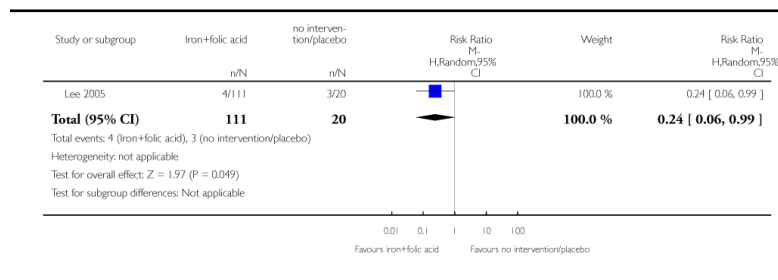

**Analysis 2.35. Comparison 2 Any supplements containing iron and folic acid versus same supplements without iron nor folic acid (no iron nor folic acid or placebo), Outcome 35 Maternal iron-deficiency anaemia at or near**

## term (Hb less than 110 g/L and at least one additional laboratory indicators at 34 weeks' gestation or more) (ALL)

Review: Daily oral iron supplementation during pregnancy

Comparison: 2 Any supplements containing iron and folic acid versus same supplements without iron nor folic acid (no iron nor folic acid or placebo)

Outcome: 35 Maternal iron-deficiency anaemia at or near term (Hb less than 110 g/L and at least one additional laboratory indicators at 34 weeks' gestation or more) (ALL)

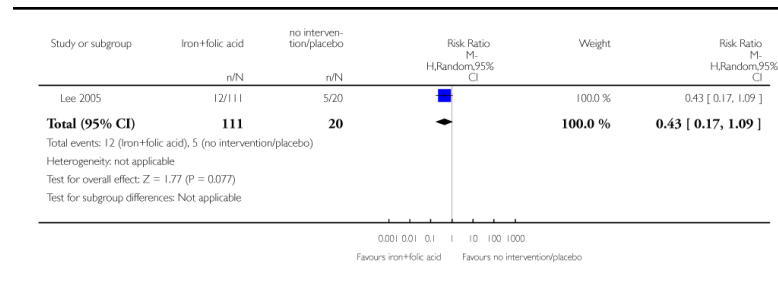

## Analysis 2.36. Comparison 2 Any supplements containing iron and folic acid versus same supplements without iron nor folic acid (no iron nor folic acid or placebo), Outcome 36 Maternal Hb concentration at or near term (in g/L, at 34 weeks' gestation or more) (ALL)

Review: Daily oral iron supplementation during pregnancy

Comparison: 2 Any supplements containing iron and folic acid versus same supplements without iron nor folic acid (no iron nor folic acid or placebo)

Outcome: 36 Maternal Hb concentration at or near term (in g/L, at 34 weeks' gestation or more) (ALL)

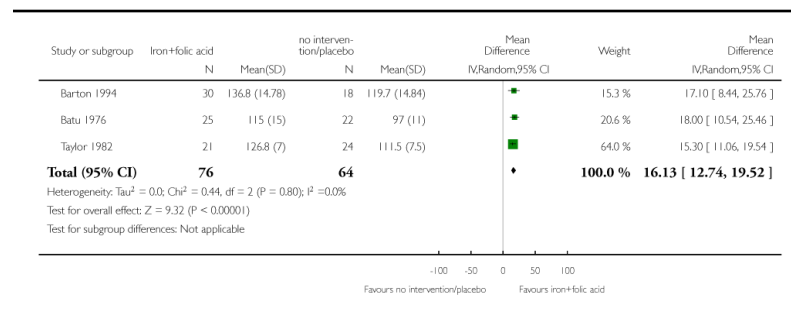

**Analysis 2.37. Comparison 2 Any supplements containing iron and folic acid versus same supplements without iron nor folic acid (no iron nor folic acid or placebo), Outcome 37 Maternal Hb concentration within 6 wk postpartum (in g/L) (ALL)**

Review: Daily oral iron supplementation during pregnancy

Comparison: 2 Any supplements containing iron and folic acid versus same supplements without iron nor folic acid (no iron nor folic acid or placebo)

Outcome: 37 Maternal Hb concentration within 6 wk postpartum (in g/L) (ALL)

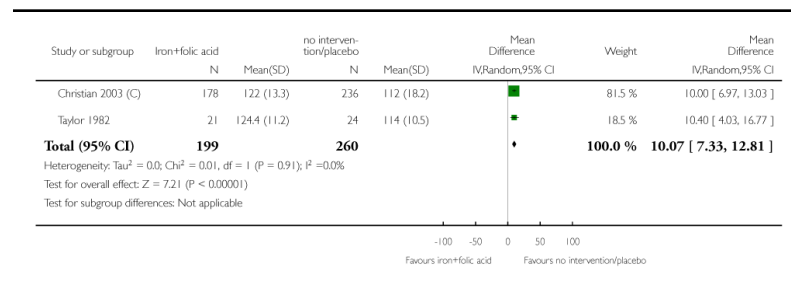

**Analysis 2.38. Comparison 2 Any supplements containing iron and folic acid versus same supplements without iron nor folic acid (no iron nor folic acid or placebo), Outcome 38 Maternal high haemoglobin concentrations during second or third trimester (Hb more than 130 g/L) (ALL)**

Review: Daily oral iron supplementation during pregnancy

Comparison: 2 Any supplements containing iron and folic acid versus same supplements without iron nor folic acid (no iron nor folic acid or placebo)

Outcome: 38 Maternal high haemoglobin concentrations during second or third trimester (Hb more than 130 g/L) (ALL)

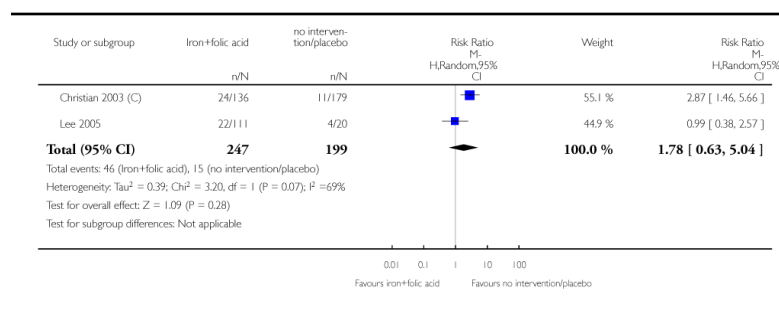

**Analysis 2.39. Comparison 2 Any supplements containing iron and folic acid versus same supplements without iron nor folic acid (no iron nor folic acid or placebo), Outcome 39 Maternal high haemoglobin concentrations at or near term (Hb more than 130 g/L at 34 weeks' gestation or more) (ALL)**

Review: Daily oral iron supplementation during pregnancy

Comparison: 2 Any supplements containing iron and folic acid versus same supplements without iron nor folic acid (no iron nor folic acid or placebo)

Outcome: 39 Maternal high haemoglobin concentrations at or near term (Hb more than 130 g/L at 34 weeks' gestation or more) (ALL)

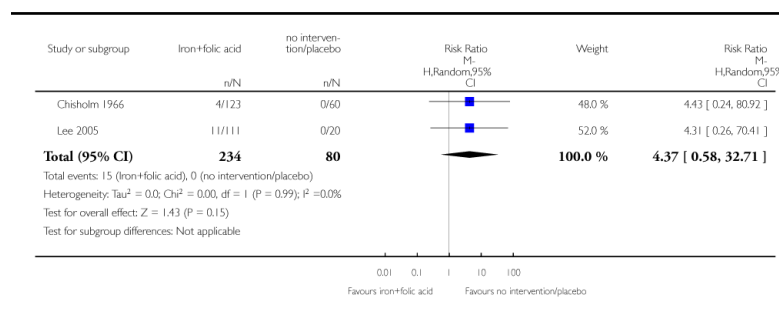

**Analysis 2.40. Comparison 2 Any supplements containing iron and folic acid versus same supplements without iron nor folic acid (no iron nor folic acid or placebo), Outcome 40 Moderate anaemia at postpartum (Hb more than 80 g/L and less than 110 g/L) (ALL)**

Review: Daily oral iron supplementation during pregnancy

Comparison: 2 Any supplements containing iron and folic acid versus same supplements without iron nor folic acid (no iron nor folic acid or placebo)

Outcome: 40 Moderate anaemia at postpartum (Hb more than 80 g/L and less than 110 g/L) (ALL)

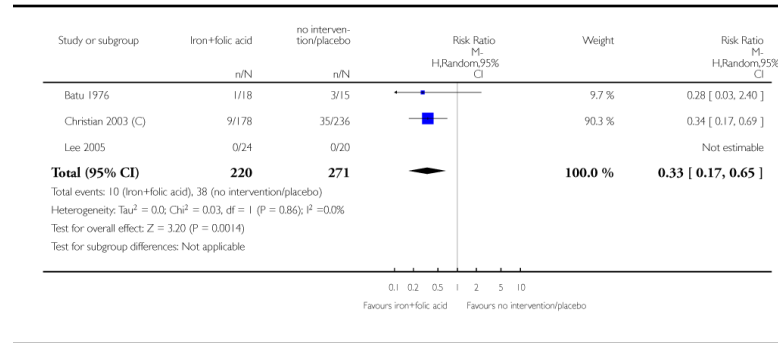

**Analysis 2.41. Comparison 2 Any supplements containing iron and folic acid versus same supplements without iron nor folic acid (no iron nor folic acid or placebo), Outcome 41 Maternal severe anaemia at or near term (Hb less than 70 g/L at 34 weeks' gestation or more ) (ALL)**

Review: Daily oral iron supplementation during pregnancy

Comparison: 2 Any supplements containing iron and folic acid versus same supplements without iron nor folic acid (no iron nor folic acid or placebo)

Outcome: 41 Maternal severe anaemia at or near term (Hb less than 70 g/L at 34 weeks' gestation or more ) (ALL)

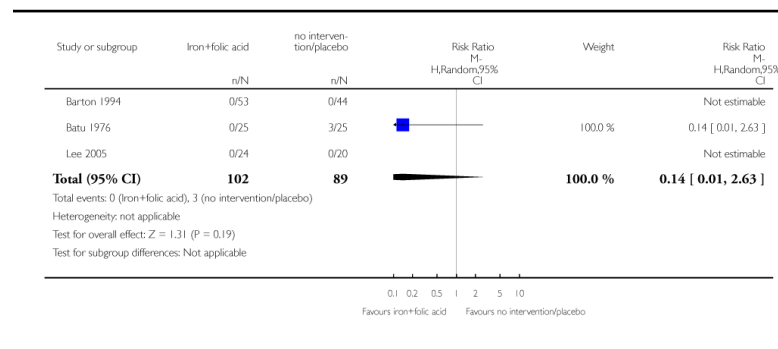

**Analysis 2.42. Comparison 2 Any supplements containing iron and folic acid versus same supplements without iron nor folic acid (no iron nor folic**

## acid or placebo), Outcome 42 Severe anaemia at postpartum (Hb less than 80 g/L) (ALL)

Review: Daily oral iron supplementation during pregnancy

Comparison: 2 Any supplements containing iron and folic acid versus same supplements without iron nor folic acid (no iron nor folic acid or placebo)

Outcome: 42 Severe anaemia at postpartum (Hb less than 80 g/L) (ALL)

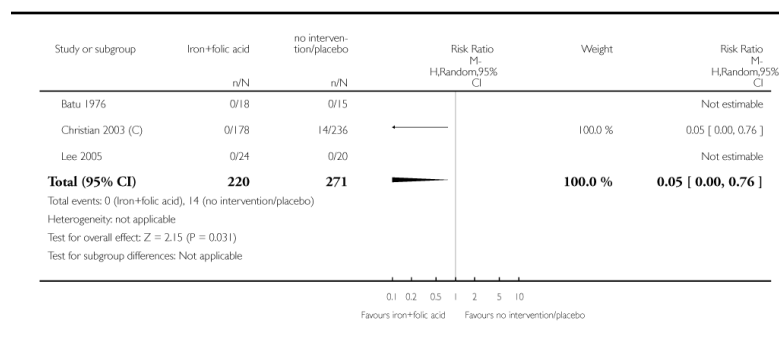

## Analysis 2.43. Comparison 2 Any supplements containing iron and folic acid versus same supplements without iron nor folic acid (no iron nor folic acid or placebo), Outcome 43 Puerperal infection (ALL)

Review: Daily oral iron supplementation during pregnancy

Comparison: 2 Any supplements containing iron and folic acid versus same supplements without iron nor folic acid (no iron nor folic acid or placebo)

Outcome: 43 Puerperal infection (ALL)

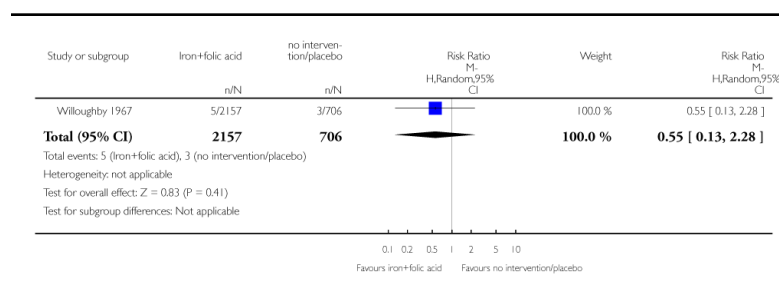



## Analysis 2.44. Comparison 2 Any supplements containing iron and folic acid versus same supplements without iron nor folic acid (no iron nor folic acid or placebo), Outcome 44 Antepartum haemorrhage (ALL)

Review: Daily oral iron supplementation during pregnancy

Comparison: 2 Any supplements containing iron and folic acid versus same supplements without iron nor folic acid (no iron nor folic acid or placebo)

Outcome: 44 Antepartum haemorrhage (ALL)

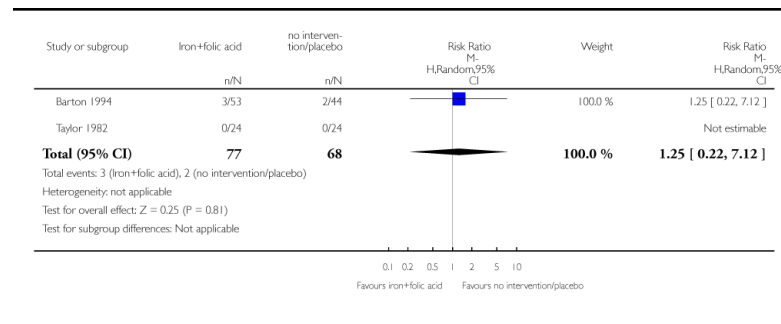

## Analysis 2.46. Comparison 2 Any supplements containing iron and folic acid versus same supplements without iron nor folic acid (no iron nor folic acid or placebo), Outcome 46 Placental abruption (ALL)

Review: Daily oral iron supplementation during pregnancy

Comparison: 2 Any supplements containing iron and folic acid versus same supplements without iron nor folic acid (no iron nor folic acid or placebo)

Outcome: 46 Placental abruption (ALL)

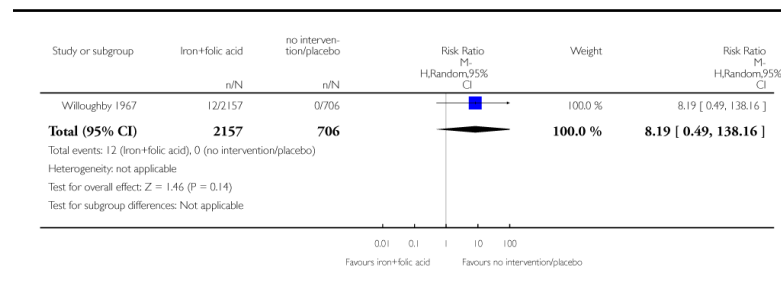

## Analysis 2.47. Comparison 2 Any supplements containing iron and folic acid versus same supplements without iron nor folic acid (no iron nor folic acid or placebo), Outcome 47 Pre-eclampsia (ALL)

Review: Daily oral iron supplementation during pregnancy

Comparison: 2 Any supplements containing iron and folic acid versus same supplements without iron nor folic acid (no iron nor folic acid or placebo)

Outcome: 47 Pre-eclampsia (ALL)

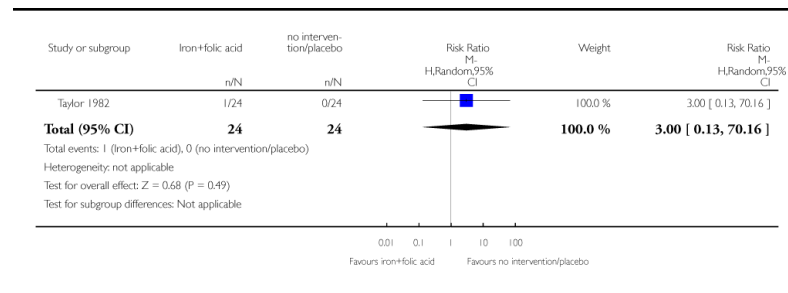

## Analysis 3.1. Comparison 3 Supplementation with iron alone versus no treatment/placebo, Outcome 1 Low birthweight (less than 2500 g) (ALL)

Review: Daily oral iron supplementation during pregnancy

Comparison: 3 Supplementation with iron alone versus no treatment/placebo

Outcome: 1 Low birthweight (less than 2500 g) (ALL)

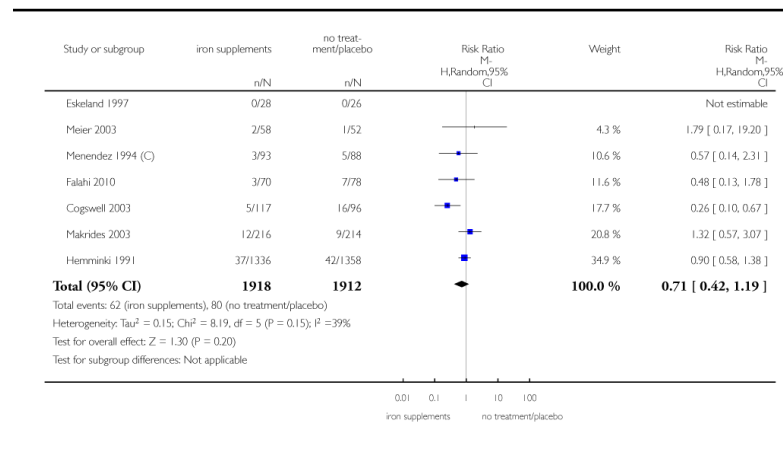

### Analysis 3.2. Comparison 3 Supplementation with iron alone versus no treatment/placebo, Outcome 2 Low birthweight (less than 2500 g): SUBGROUP ANALYSIS by gestational age at the start of supplementation.

Review: Daily oral iron supplementation during pregnancy

Comparison: 3 Supplementation with iron alone versus no treatment/placebo

Outcome: 2 Low birthweight (less than 2500 g): SUBGROUP ANALYSIS by gestational age at the start of supplementation

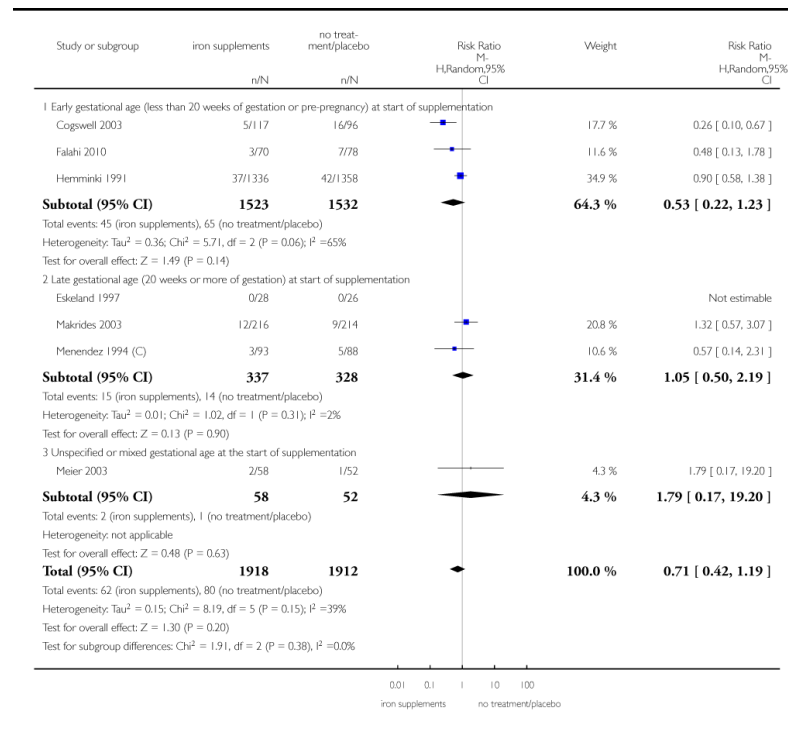

### Analysis 3.3. Comparison 3 Supplementation with iron alone versus no treatment/placebo, Outcome 3 Low birthweight (less than 2500 g): SUBGROUP ANALYSIS by anaemia status at the start of supplementation.

Review: Daily oral iron supplementation during pregnancy

Comparison: 3 Supplementation with iron alone versus no treatment/placebo

Outcome: 3 Low birthweight (less than 2500 g): SUBGROUP ANALYSIS by anaemia status at the start of supplementation

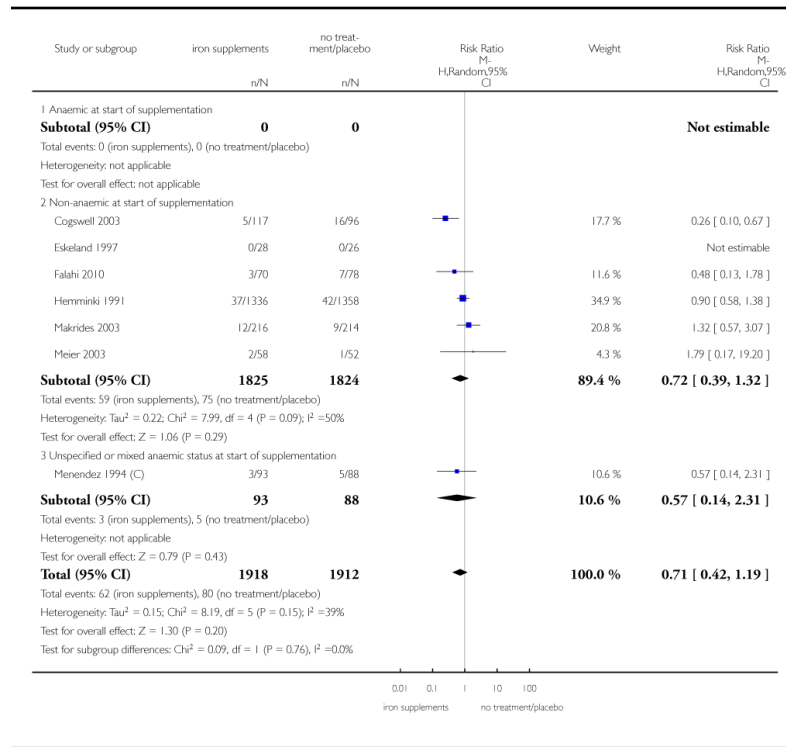

### Analysis 3.4. Comparison 3 Supplementation with iron alone versus no treatment/placebo, Outcome 4 Low birthweight (less than 2500 g): SUBGROUP ANALYSIS by dose of iron.

Review: Daily oral iron supplementation during pregnancy

Comparison: 3 Supplementation with iron alone versus no treatment/placebo

Outcome: 4 Low birthweight (less than 2500 g): SUBGROUP ANALYSIS by dose of iron

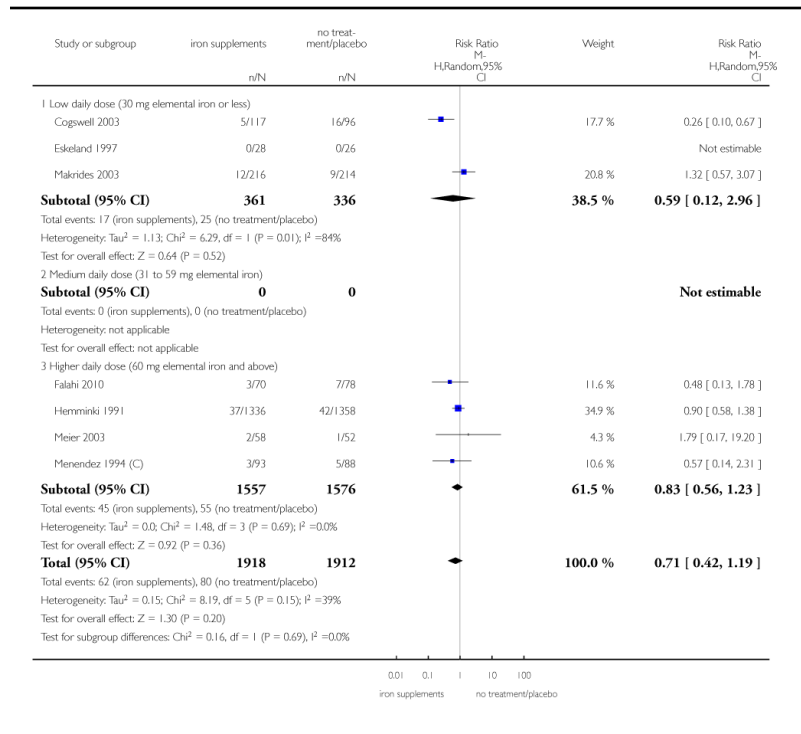

**Analysis 3.5. Comparison 3 Supplementation with iron alone versus no treatment/placebo, Outcome 5 Low birthweight (less than 2500 g): SUBGROUP ANALYSIS by malarial status of setting.**

Review: Daily oral iron supplementation during pregnancy

Comparison: 3 Supplementation with iron alone versus no treatment/placebo

Outcome: 5 Low birthweight (less than 2500 g): SUBGROUP ANALYSIS by malarial status of setting

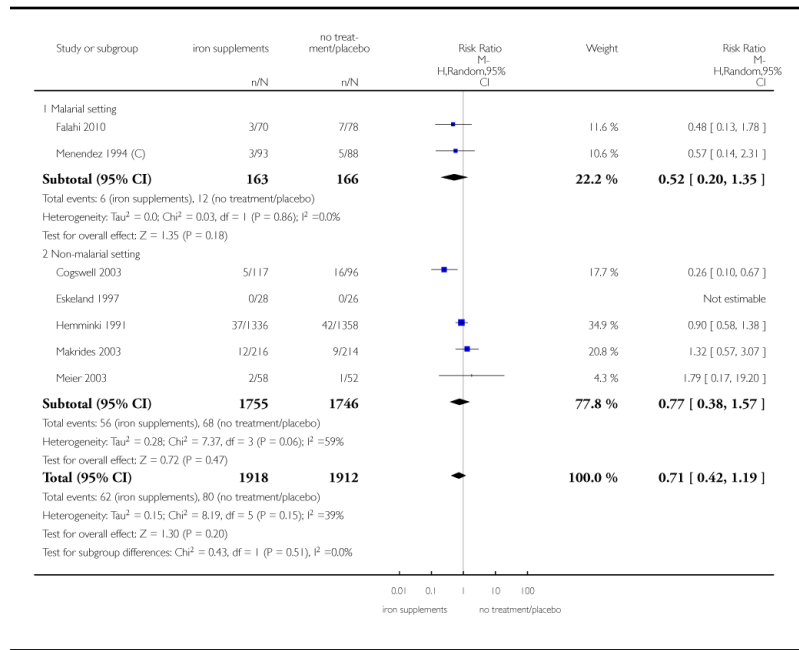

### Analysis 3.6. Comparison 3 Supplementation with iron alone versus no treatment/placebo, Outcome 6 Birthweight (g) (ALL)

Review: Daily oral iron supplementation during pregnancy

Comparison: 3 Supplementation with iron alone versus no treatment/placebo

Outcome: 6 Birthweight (g) (ALL)

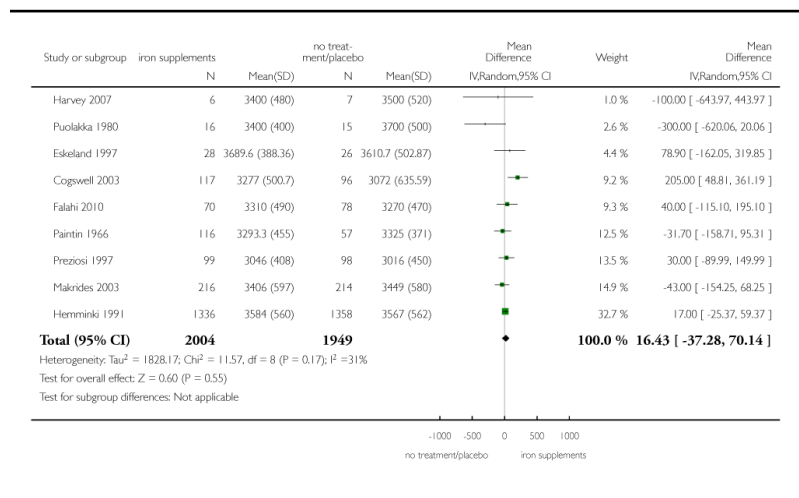

### Analysis 3.7. Comparison 3 Supplementation with iron alone versus no treatment/placebo, Outcome 7 Birthweight (g): SUBGROUP ANALYSIS by gestational age at the start of supplementation.

Review: Daily oral iron supplementation during pregnancy

Comparison: 3 Supplementation with iron alone versus no treatment/placebo

Outcome: 7 Birthweight (g): SUBGROUP ANALYSIS by gestational age at the start of supplementation

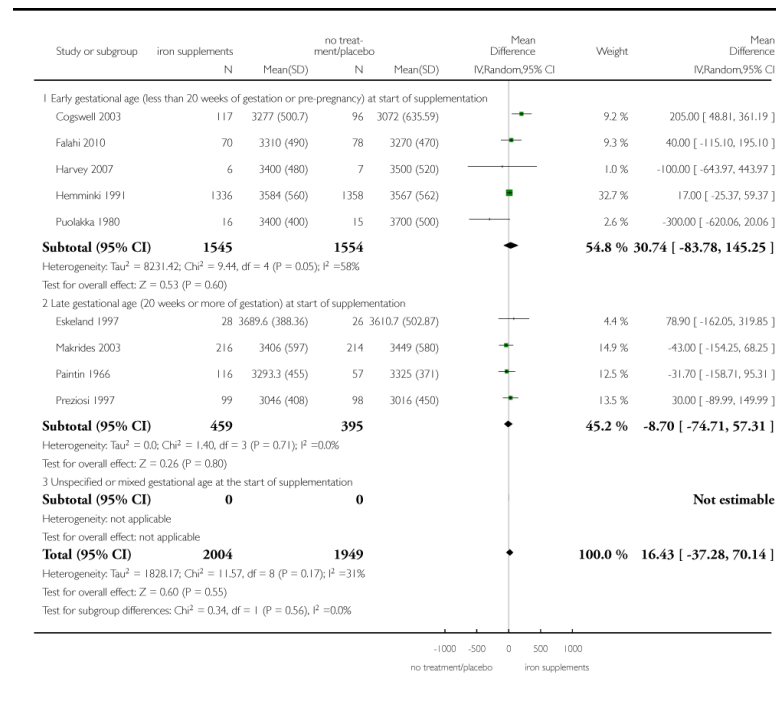

### Analysis 3.8. Comparison 3 Supplementation with iron alone versus no treatment/placebo, Outcome 8 Birthweight (g): SUBGROUP ANALYSIS by anaemia status at the start of supplementation.

Review: Daily oral iron supplementation during pregnancy

Comparison: 3 Supplementation with iron alone versus no treatment/placebo

Outcome: 8 Birthweight (g): SUBGROUP ANALYSIS by anaemia status at the start of supplementation

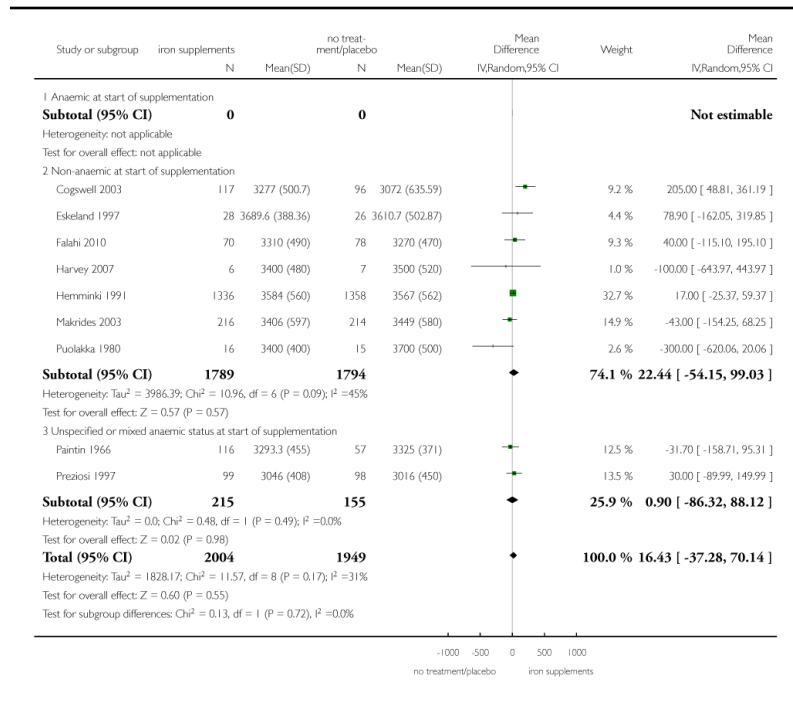

### Analysis 3.9. Comparison 3 Supplementation with iron alone versus no treatment/placebo, Outcome 9 Birthweight (g): SUBGROUP ANALYSIS by dose of iron.

Review: Daily oral iron supplementation during pregnancy

Comparison: 3 Supplementation with iron alone versus no treatment/placebo

Outcome: 9 Birthweight (g): SUBGROUP ANALYSIS by dose of iron



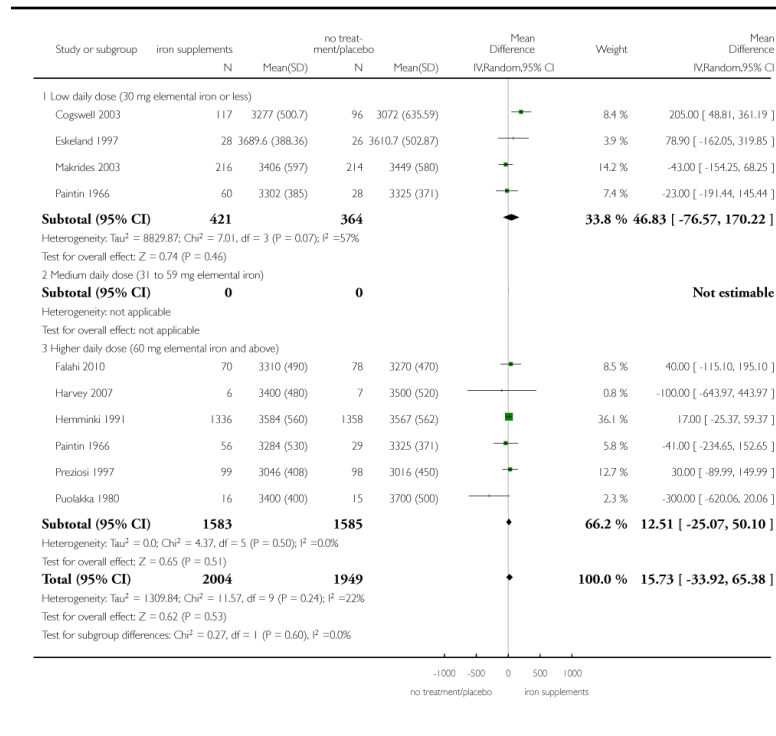

### Analysis 3.10. Comparison 3 Supplementation with iron alone versus no treatment/placebo, Outcome 10 Birthweight (g): SUBGROUP ANALYSIS by malarial status of setting.

Review: Daily oral iron supplementation during pregnancy

Comparison: 3 Supplementation with iron alone versus no treatment/placebo

Outcome: 10 Birthweight (g): SUBGROUP ANALYSIS by malarial status of setting

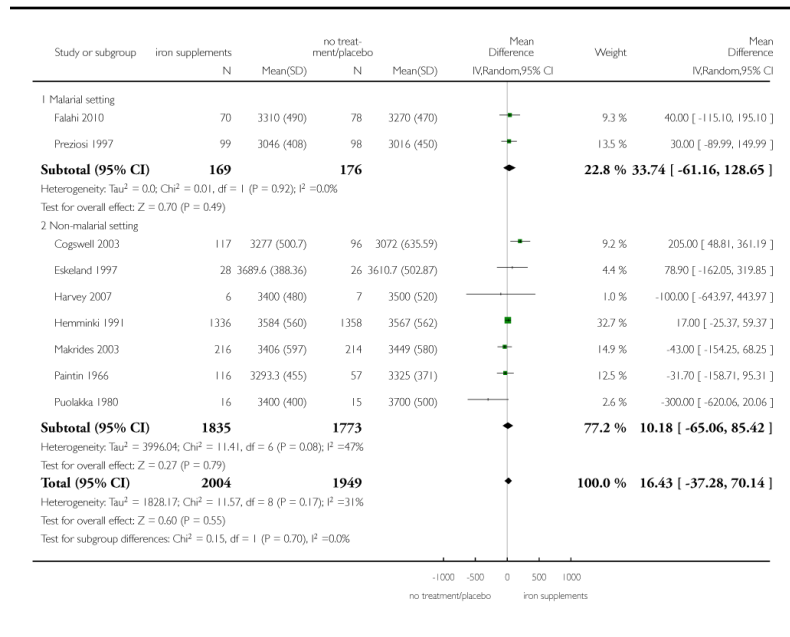

### Analysis 3.11. Comparison 3 Supplementation with iron alone versus no treatment/placebo, Outcome 11 Premature birth (less than 37 weeks of gestation) (ALL)

Review: Daily oral iron supplementation during pregnancy

Comparison: 3 Supplementation with iron alone versus no treatment/placebo

Outcome: 11 Premature birth (less than 37 weeks of gestation) (ALL)

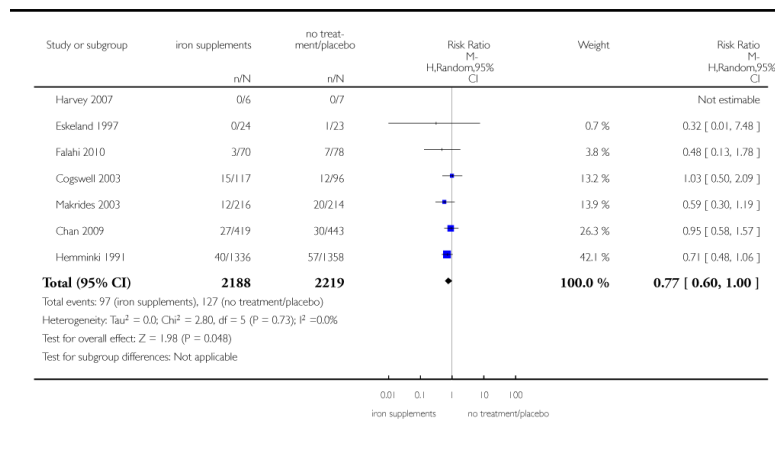

### Analysis 3.12. Comparison 3 Supplementation with iron alone versus no treatment/placebo, Outcome 12 Premature birth (less 37 weeks of gestation): SUBGROUP ANALYSIS by gestational age at the start of supplementation.

Review: Daily oral iron supplementation during pregnancy

Comparison: 3 Supplementation with iron alone versus no treatment/placebo

Outcome: 12 Premature birth (less 37 weeks of gestation): SUBGROUP ANALYSIS by gestational age at the start of supplementation

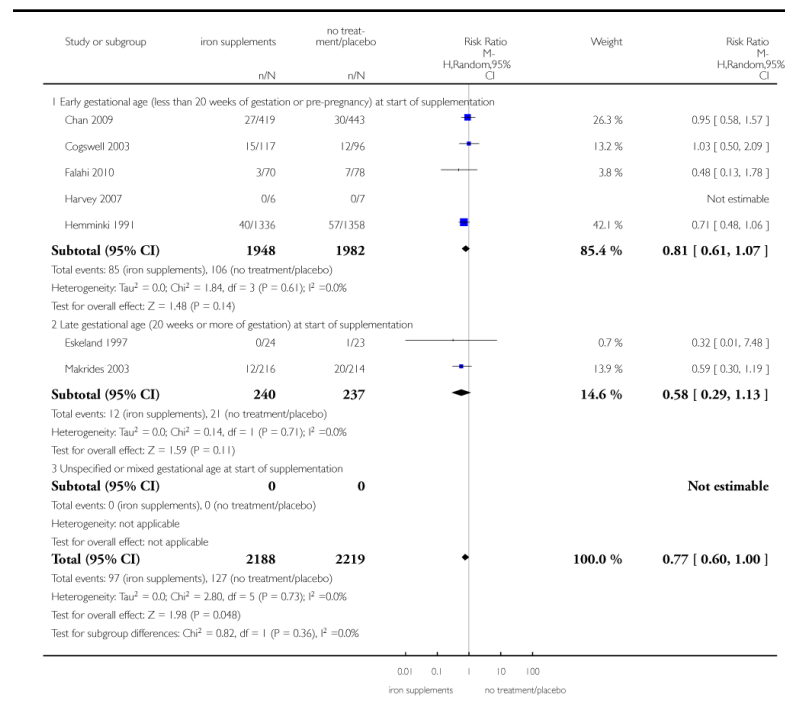

### Analysis 3.13. Comparison 3 Supplementation with iron alone versus no treatment/placebo, Outcome 13 Premature birth (less 37 weeks of gestation): SUBGROUP ANALYSIS by anaemia status at the start of supplementation.

Review: Daily oral iron supplementation during pregnancy

Comparison: 3 Supplementation with iron alone versus no treatment/placebo

Outcome: 13 Premature birth (less 37 weeks of gestation): SUBGROUP ANALYSIS by anaemia status at the start of supplementation

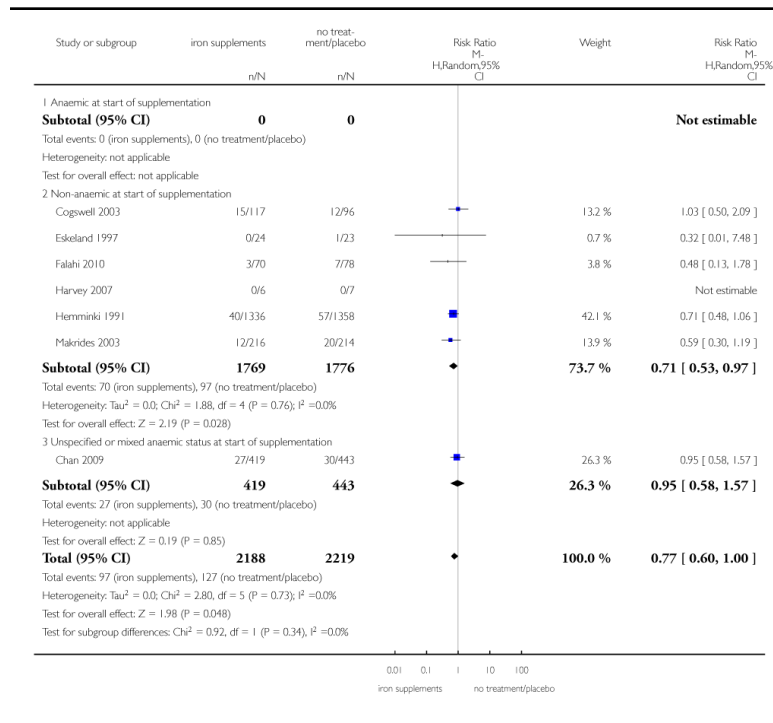

**Analysis 3.14. Comparison 3 Supplementation with iron alone versus no treatment/placebo, Outcome 14 Premature birth (less 37 weeks of gestation): SUBGROUP ANALYSIS by dose of iron.**

Review: Daily oral iron supplementation during pregnancy

Comparison: 3 Supplementation with iron alone versus no treatment/placebo

Outcome: 14 Premature birth (less 37 weeks of gestation): SUBGROUP ANALYSIS by dose of iron

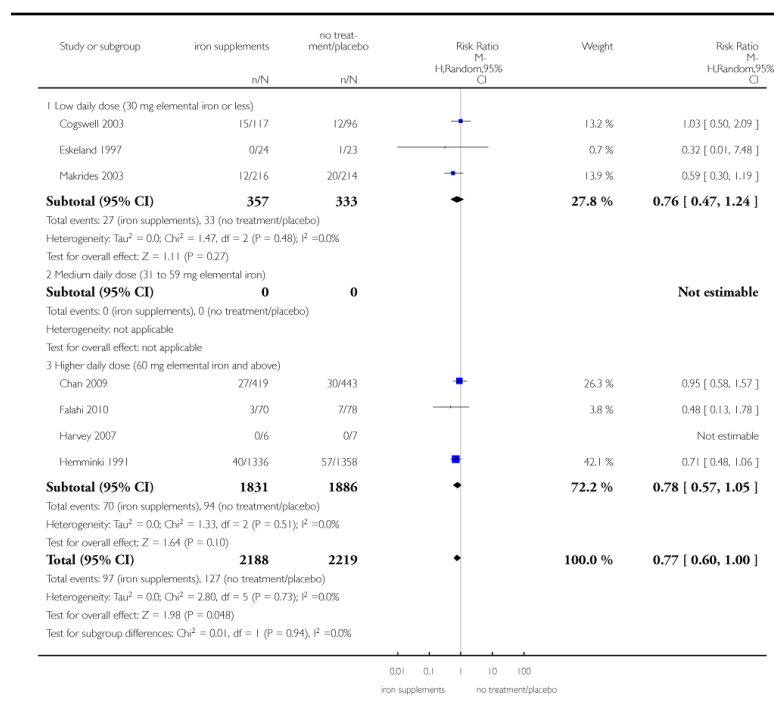

### Analysis 3.15. Comparison 3 Supplementation with iron alone versus no treatment/placebo, Outcome 15 Premature birth (less 37 weeks of gestation): SUBGROUP ANALYSIS by malarial status of setting.

Review: Daily oral iron supplementation during pregnancy

Comparison: 3 Supplementation with iron alone versus no treatment/placebo

Outcome: 15 Premature birth (less 37 weeks of gestation): SUBGROUP ANALYSIS by malarial status of setting

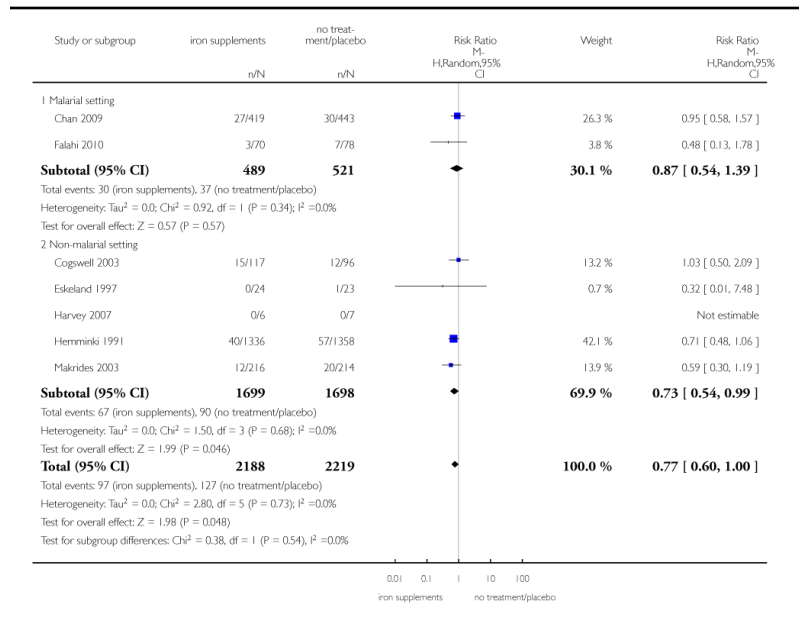

### Analysis 3.16. Comparison 3 Supplementation with iron alone versus no treatment/placebo, Outcome 16 Neonatal death (within 28 days after delivery) (ALL)

Review: Daily oral iron supplementation during pregnancy

Comparison: 3 Supplementation with iron alone versus no treatment/placebo

Outcome: 16 Neonatal death (within 28 days after delivery) (ALL)

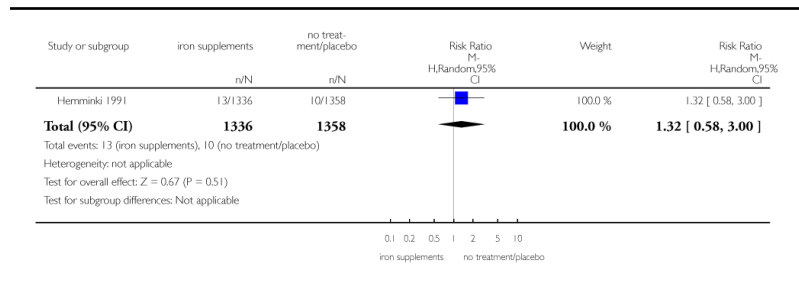

### Analysis 3.17. Comparison 3 Supplementation with iron alone versus no treatment/placebo, Outcome 17 Congenital anomalies (ALL)

Review: Daily oral iron supplementation during pregnancy

Comparison: 3 Supplementation with iron alone versus no treatment/placebo

Outcome: 17 Congenital anomalies (ALL)

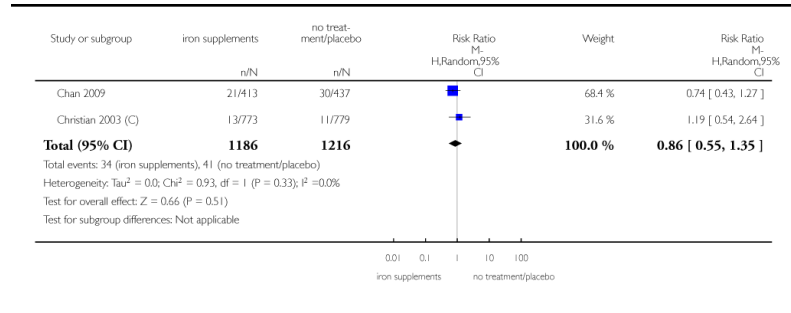

**Analysis 3.18. Comparison 3 Supplementation with iron alone versus no treatment/placebo, Outcome 18 Maternal anaemia at term (Hb less than 110 g/L at 37 weeks' gestation or more) (ALL)**

Review: Daily oral iron supplementation during pregnancy

Comparison: 3 Supplementation with iron alone versus no treatment/placebo

Outcome: 18 Maternal anaemia at term (Hb less than 110 g/L at 37 weeks' gestation or more) (ALL)

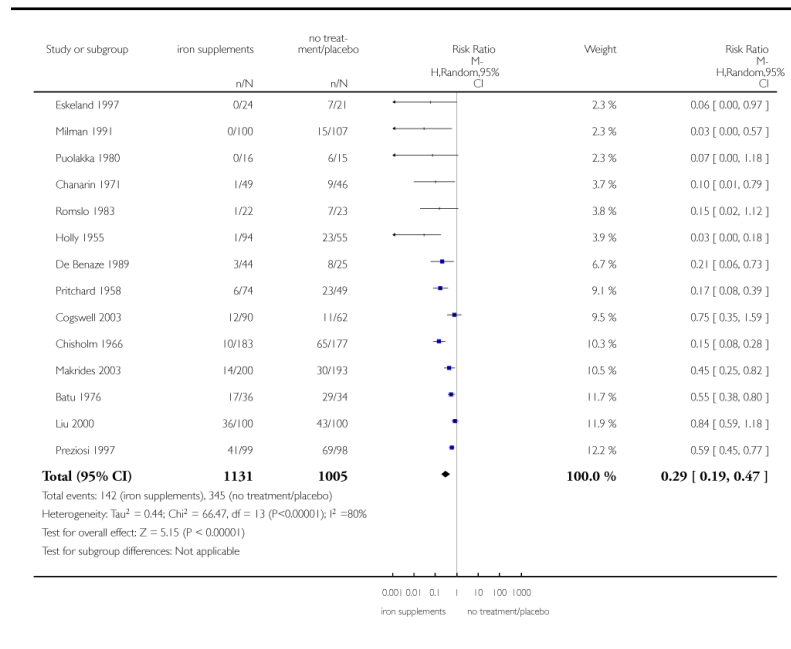

### Analysis 3.19. Comparison 3 Supplementation with iron alone versus no treatment/placebo, Outcome 19 Maternal anaemia at term (Hb less than 110 g/L at 37 weeks' gestation or more): SUBGROUP ANALYSIS by gestational age at the start of supplementation.

Review: Daily oral iron supplementation during pregnancy

Comparison: 3 Supplementation with iron alone versus no treatment/placebo

Outcome: 19 Maternal anaemia at term (Hb less than 110 g/L at 37 weeks' gestation or more): SUBGROUP ANALYSIS by gestational age at the start of supplementation

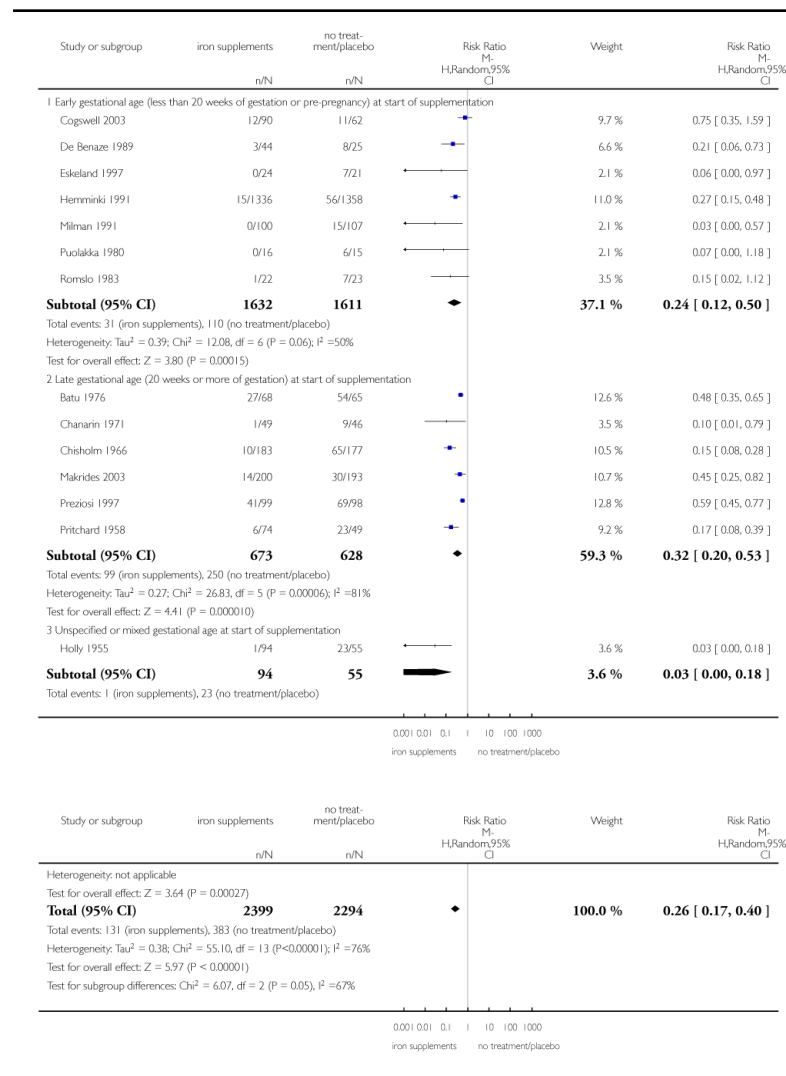



### Analysis 3.20. Comparison 3 Supplementation with iron alone versus no treatment/placebo, Outcome 20 Maternal anaemia at term (Hb less than 110 g/L at 37 weeks gestation or more): SUBGROUP ANALYSIS by anaemia status at the start of supplementation.

Review: Daily oral iron supplementation during pregnancy

Comparison: 3 Supplementation with iron alone versus no treatment/placebo

Outcome: 20 Maternal anaemia at term (Hb less than 110 g/L at 37 weeks gestation or more): SUBGROUP ANALYSIS by anaemia status at the start of supplementation

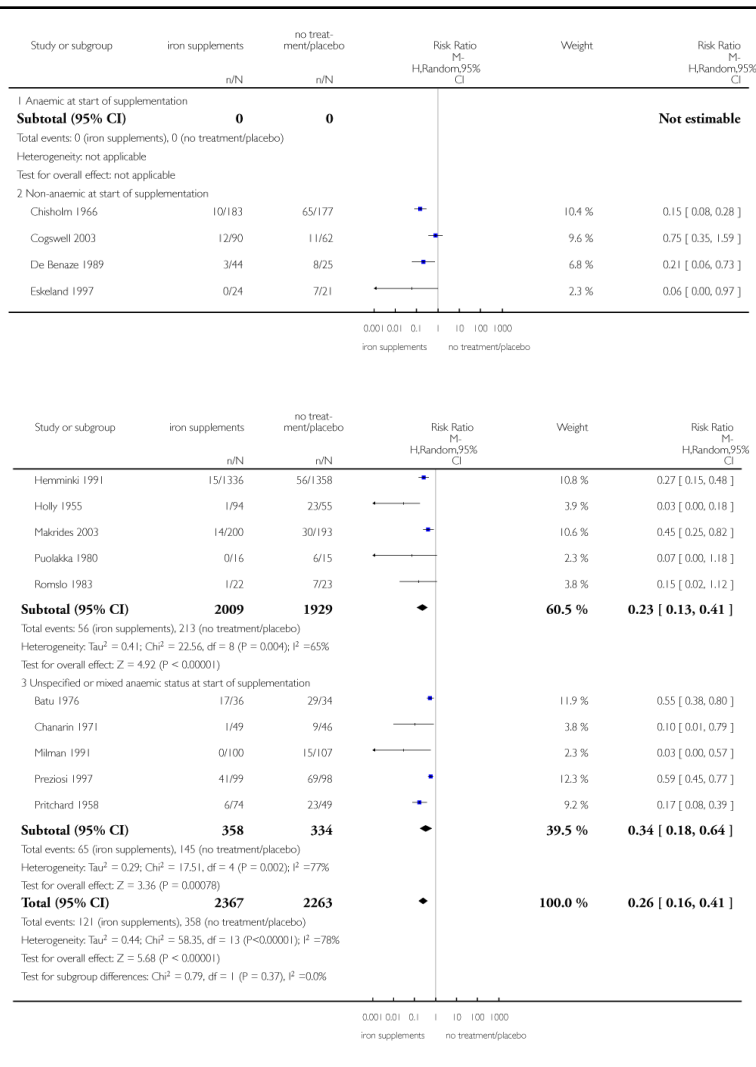

### Analysis 3.21. Comparison 3 Supplementation with iron alone versus no treatment/placebo, Outcome 21 Maternal anaemia at term (Hb less than 110 g/L at 37 weeks' gestation or more): SUBGROUP ANALYSIS by dose of iron.

Review: Daily oral iron supplementation during pregnancy

Comparison: 3 Supplementation with iron alone versus no treatment/placebo

Outcome: 21 Maternal anaemia at term (Hb less than 110 g/L at 37 weeks' gestation or more): SUBGROUP ANALYSIS by dose of iron

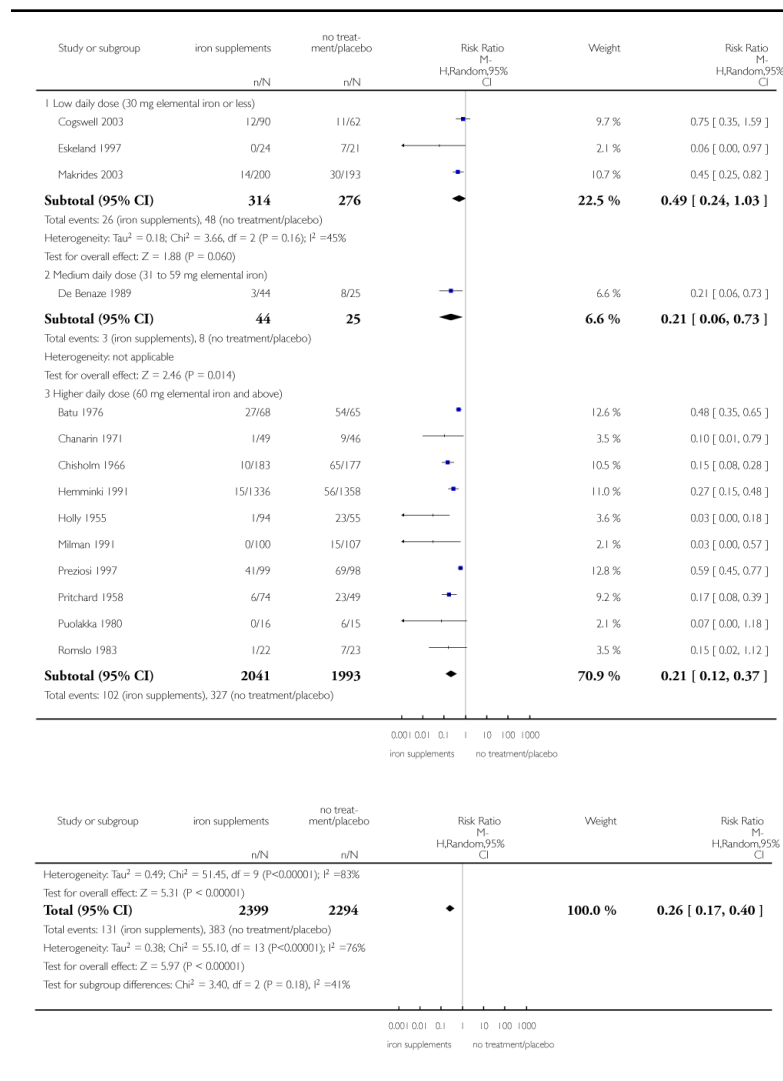

### Analysis 3.22. Comparison 3 Supplementation with iron alone versus no treatment/placebo, Outcome 22 Maternal anaemia at term (Hb less than 110 g/L at 37 weeks' gestation or more): SUBGROUP ANALYSIS by malarial status of setting.

Review: Daily oral iron supplementation during pregnancy

Comparison: 3 Supplementation with iron alone versus no treatment/placebo

Outcome: 22 Maternal anaemia at term (Hb less than 110 g/L at 37 weeks' gestation or more): SUBGROUP ANALYSIS by malarial status of setting

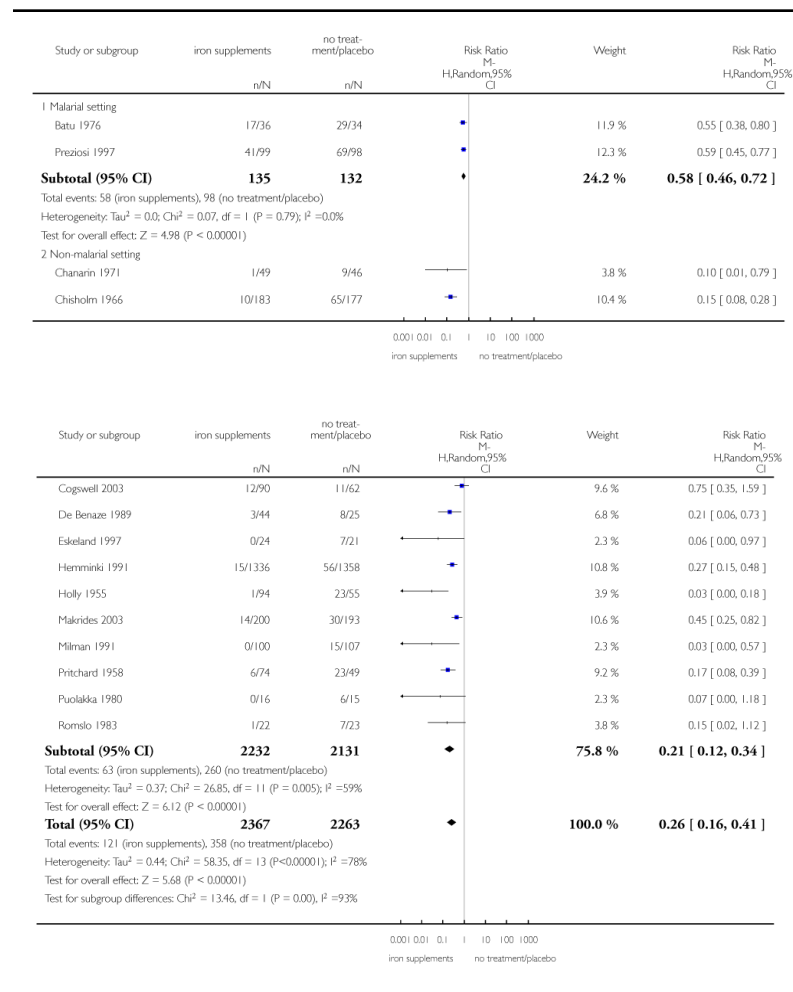

### Analysis 3.23. Comparison 3 Supplementation with iron alone versus no treatment/placebo, Outcome 23 Maternal iron deficiency at term (as defined

## by trialists, based on any indicator of iron status at 37 weeks' gestation or more) (ALL)

Review: Daily oral iron supplementation during pregnancy

Comparison: 3 Supplementation with iron alone versus no treatment/placebo

Outcome: 23 Maternal iron deficiency at term (as defined by trialists, based on any indicator of iron status at 37 weeks' gestation or more) (ALL)

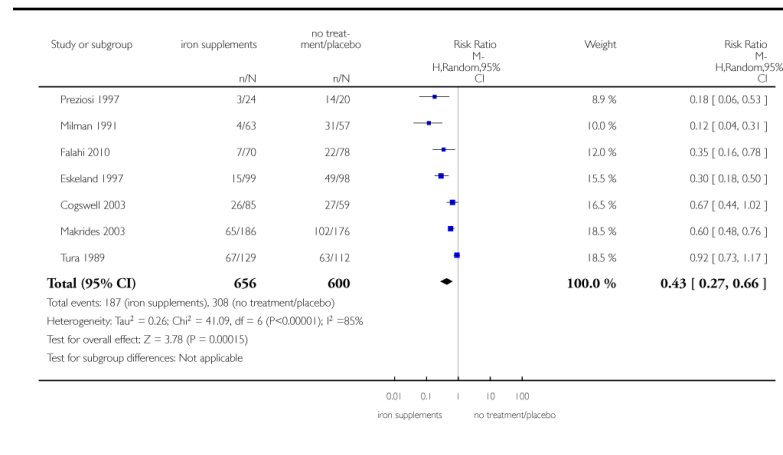

## Analysis 3.24. Comparison 3 Supplementation with iron alone versus no treatment/placebo, Outcome 24 Maternal iron deficiency at term (as defined by trialists, based on any indicator of iron status at 37 weeks' gestation or more): SUBGROUP ANALYSIS by gestational age at the start of supplementation.

Review: Daily oral iron supplementation during pregnancy

Comparison: 3 Supplementation with iron alone versus no treatment/placebo

Outcome: 24 Maternal iron deficiency at term (as defined by trialists, based on any indicator of iron status at 37 weeks' gestation or more): SUBGROUP ANALYSIS by gestational age at the start of supplementation

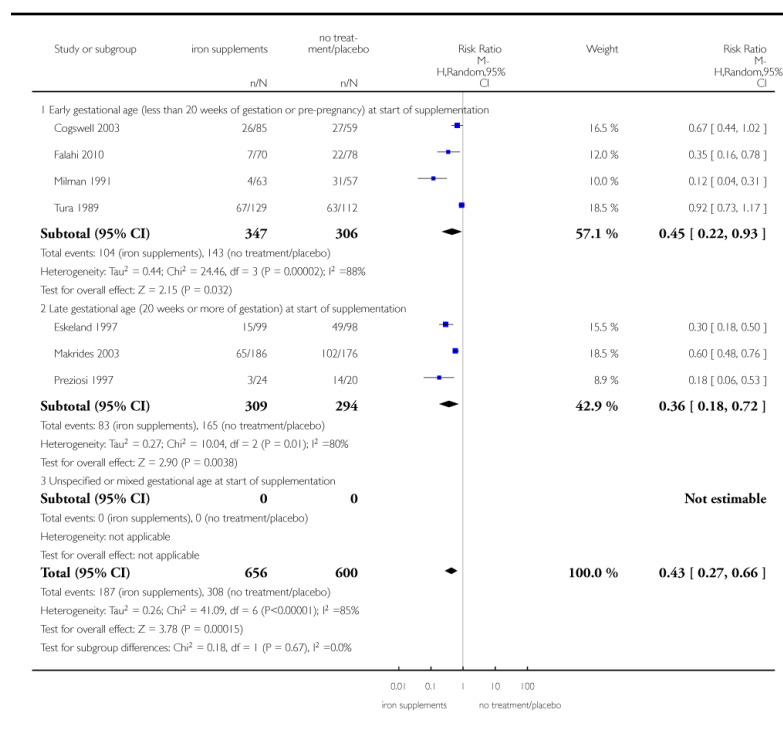

**Analysis 3.25. Comparison 3 Supplementation with iron alone versus no treatment/placebo, Outcome 25 Maternal iron deficiency at term (as defined by trialists, based on any indicator of iron status at 37 weeks' gestation or more): SUBGROUP ANALYSIS by anaemia status at the start of supplementation.**

Review: Daily oral iron supplementation during pregnancy

Comparison: 3 Supplementation with iron alone versus no treatment/placebo

Outcome: 25 Maternal iron deficiency at term (as defined by trialists, based on any indicator of iron status at 37 weeks' gestation or more): SUBGROUP ANALYSIS by anaemia status at the start of supplementation

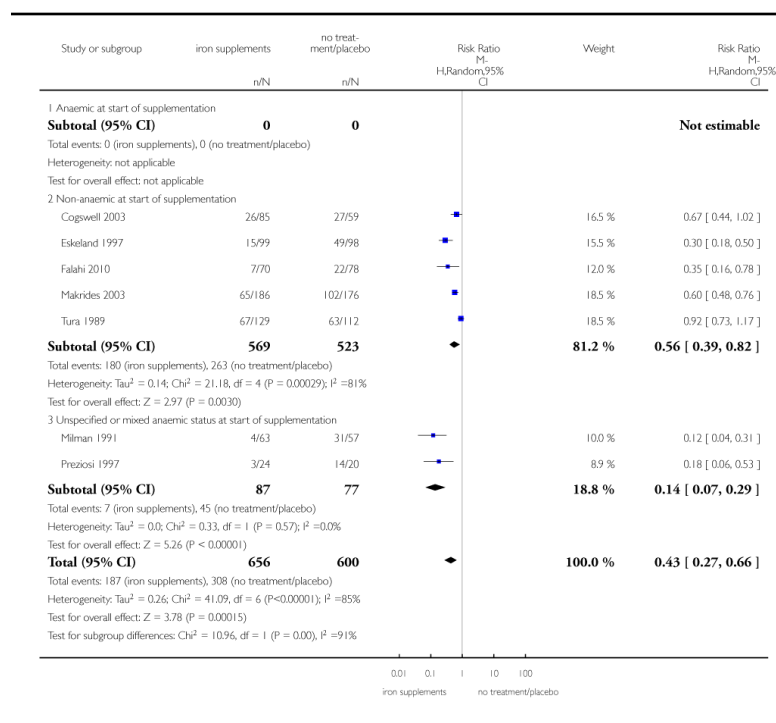

**Analysis 3.26. Comparison 3 Supplementation with iron alone versus no treatment/placebo, Outcome 26 Maternal iron deficiency at term (as defined by trialists, based on any indicator of iron status at 37 weeks' gestation or more): SUBGROUP ANALYSIS by dose of iron.**

Review: Daily oral iron supplementation during pregnancy

Comparison: 3 Supplementation with iron alone versus no treatment/placebo

Outcome: 26 Maternal iron deficiency at term (as defined by trialists, based on any indicator of iron status at 37 weeks' gestation or more): SUBGROUP ANALYSIS by dose of iron

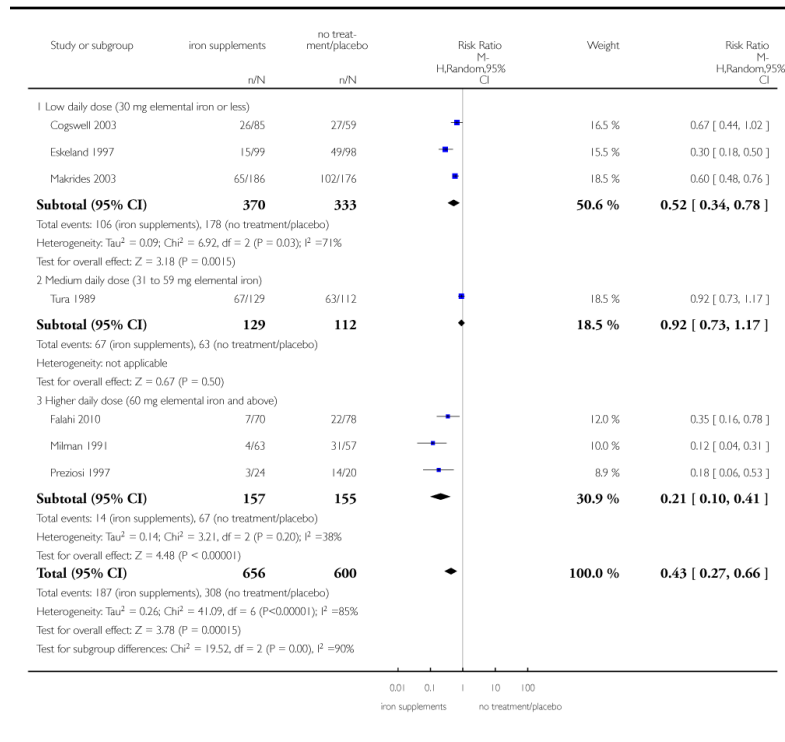

### Analysis 3.27. Comparison 3 Supplementation with iron alone versus no treatment/placebo, Outcome 27 Maternal iron deficiency at term (as defined by trialists, based on any indicator of iron status at 37 weeks' gestation or more): SUBGROUP ANALYSIS by malarial status of setting.

Review: Daily oral iron supplementation during pregnancy

Comparison: 3 Supplementation with iron alone versus no treatment/placebo

Outcome: 27 Maternal iron deficiency at term (as defined by trialists, based on any indicator of iron status at 37 weeks' gestation or more): SUBGROUP ANALYSIS by malarial status of setting

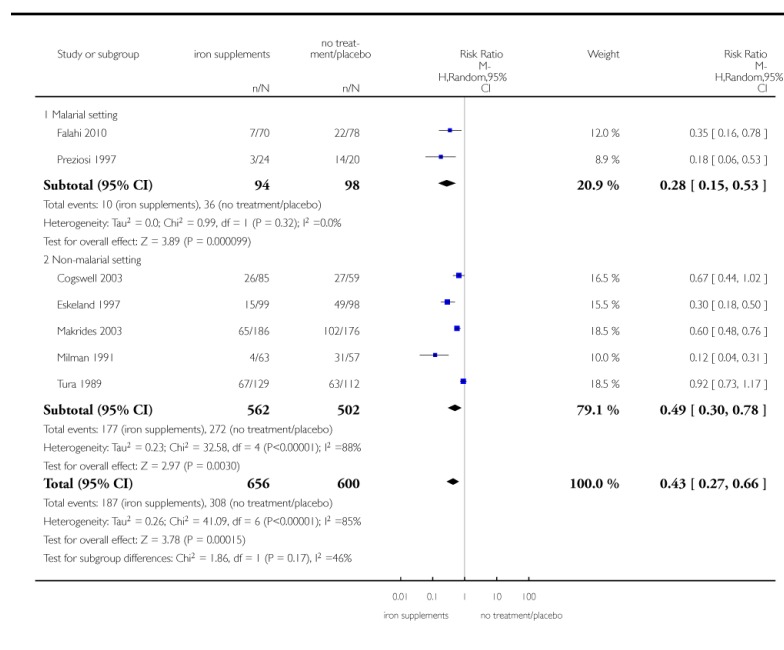

### Analysis 3.28. Comparison 3 Supplementation with iron alone versus no treatment/placebo, Outcome 28 Maternal iron-deficiency anaemia at term (Hb less than 110 g/L and at least one additional laboratory indicators at 37 weeks' gestation or more) (ALL)

Review: Daily oral iron supplementation during pregnancy

Comparison: 3 Supplementation with iron alone versus no treatment/placebo

Outcome: 28 Maternal iron-deficiency anaemia at term (Hb less than 110 g/L and at least one additional laboratory indicators at 37 weeks' gestation or more) (ALL)



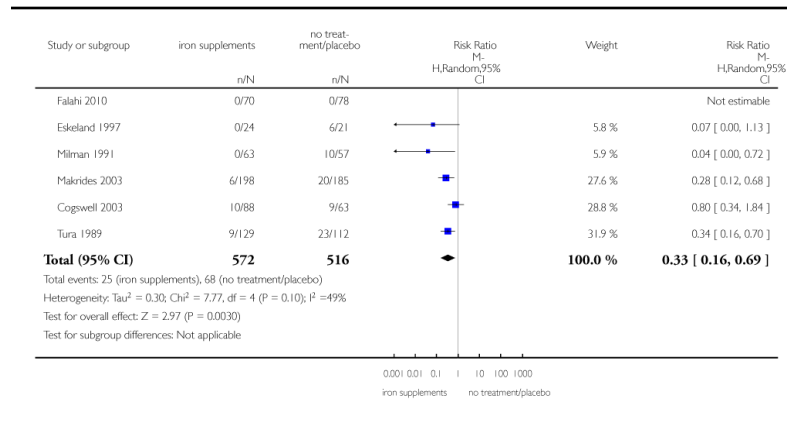

**Analysis 3.29. Comparison 3 Supplementation with iron alone versus no treatment/placebo, Outcome 29 Maternal iron-deficiency anaemia at term (Hb less than 110 g/L and at least one additional laboratory indicators at 37 weeks' gestation or more): SUBGROUP ANALYSIS by gestational age at the start of supplementation.**

Review: Daily oral iron supplementation during pregnancy

Comparison: 3 Supplementation with iron alone versus no treatment/placebo

Outcome: 29 Maternal iron-deficiency anaemia at term (Hb less than 110 g/L and at least one additional laboratory indicators at 37 weeks' gestation or more): SUBGROUP ANALYSIS by gestational age at the start of supplementation

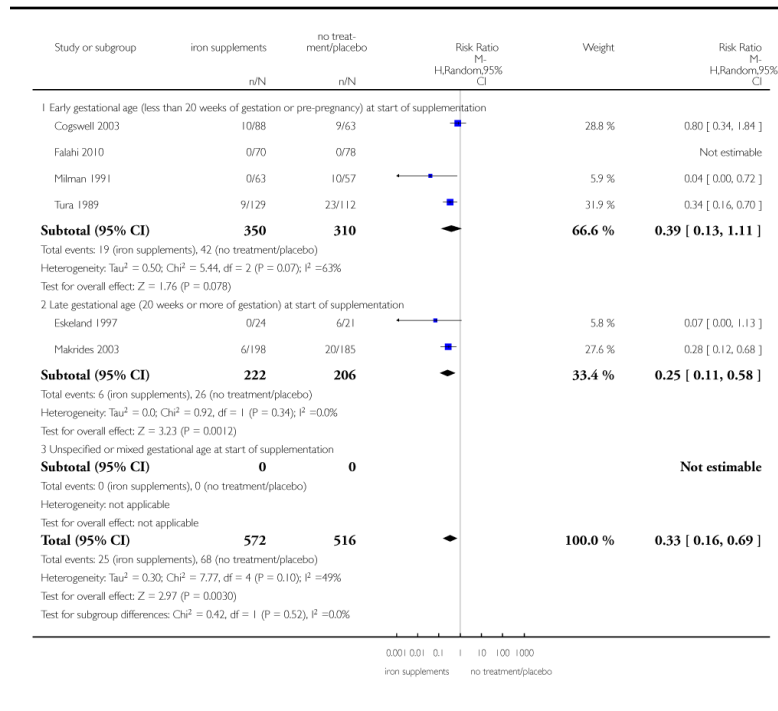

**Analysis 3.30. Comparison 3 Supplementation with iron alone versus no treatment/placebo, Outcome 30 Maternal iron-deficiency anaemia at term (Hb less than 110 g/L and at least one additional laboratory indicators at 37 weeks' gestation or more): SUBGROUP ANALYSIS by anaemia status at the start of supplementation.**

Review: Daily oral iron supplementation during pregnancy

Comparison: 3 Supplementation with iron alone versus no treatment/placebo

Outcome: 30 Maternal iron-deficiency anaemia at term (Hb less than 110 g/L and at least one additional laboratory indicators at 37 weeks' gestation or more): SUBGROUP ANALYSIS by anaemia status at the start of supplementation

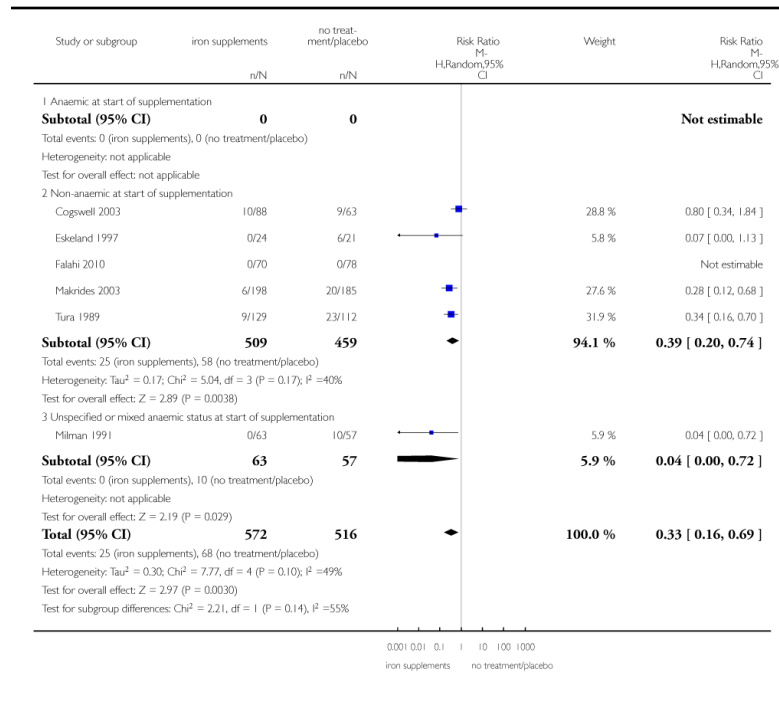

### Analysis 3.31. Comparison 3 Supplementation with iron alone versus no treatment/placebo, Outcome 31 Maternal iron-deficiency anaemia at term (Hb less than 110 g/L and at least one additional laboratory indicators at 37 weeks' gestation or more): SUBGROUP ANALYSIS by dose of iron.

Review: Daily oral iron supplementation during pregnancy

Comparison: 3 Supplementation with iron alone versus no treatment/placebo

Outcome: 31 Maternal iron-deficiency anaemia at term (Hb less than 110 g/L and at least one additional laboratory indicators at 37 weeks' gestation or more): SUBGROUP ANALYSIS by dose of iron

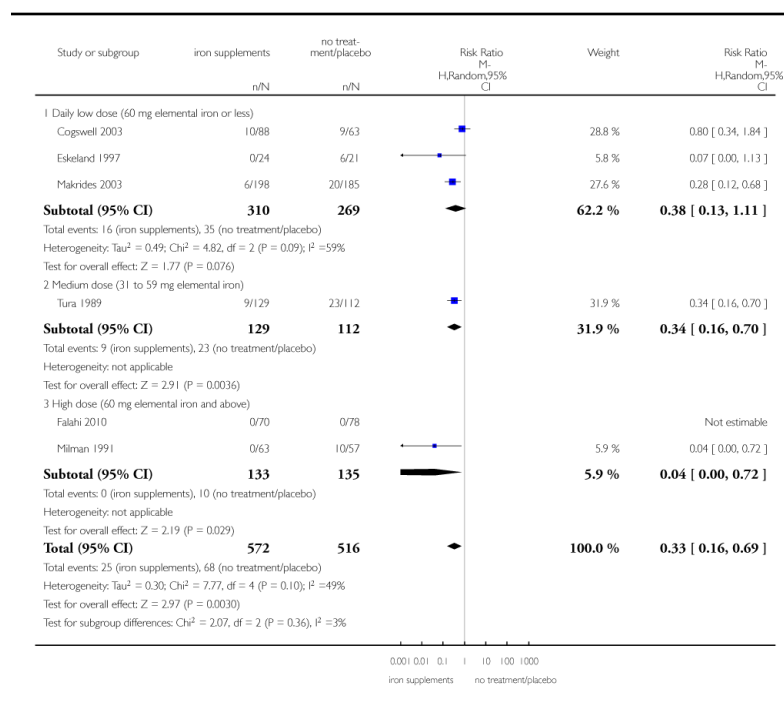

### Analysis 3.32. Comparison 3 Supplementation with iron alone versus no treatment/placebo, Outcome 32 Maternal iron-deficiency anaemia at term (Hb less than 110 g/L and at least one additional laboratory indicators at 37 weeks' gestation or more): SUBGROUP ANALYSIS by malarial status of setting.

Review: Daily oral iron supplementation during pregnancy

Comparison: 3 Supplementation with iron alone versus no treatment/placebo

Outcome: 32 Maternal iron-deficiency anaemia at term (Hb less than 110 g/L and at least one additional laboratory indicators at 37 weeks' gestation or more): SUBGROUP ANALYSIS by malarial status of setting

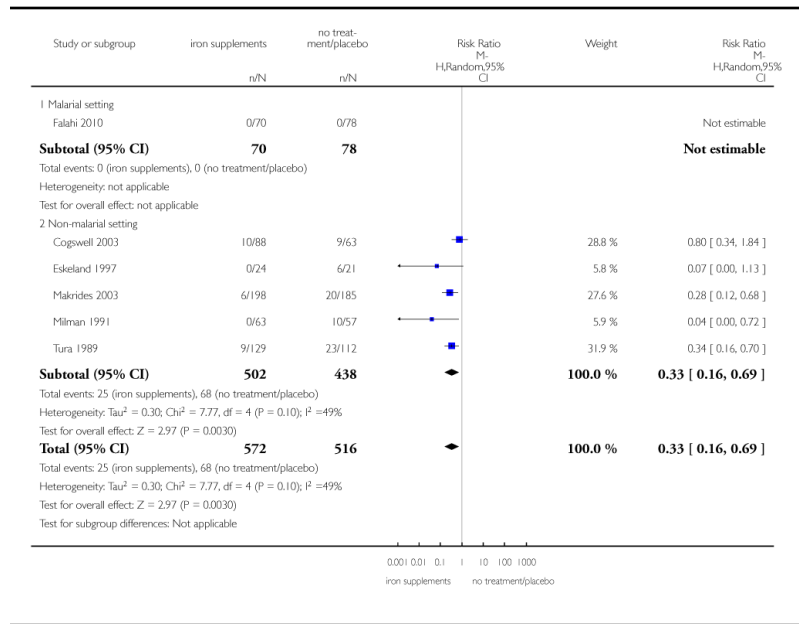

### Analysis 3.33. Comparison 3 Supplementation with iron alone versus no treatment/placebo, Outcome 33 Maternal death (death while pregnant or within 42 days of termination of pregnancy) (ALL)

Review: Daily oral iron supplementation during pregnancy

Comparison: 3 Supplementation with iron alone versus no treatment/placebo

Outcome: 33 Maternal death (death while pregnant or within 42 days of termination of pregnancy) (ALL)

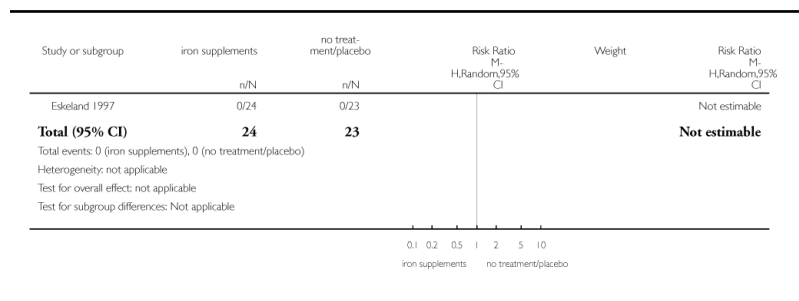

### Analysis 3.34. Comparison 3 Supplementation with iron alone versus no treatment/placebo, Outcome 34 Side effects (any reported throughout the intervention period) (ALL)

Review: Daily oral iron supplementation during pregnancy

Comparison: 3 Supplementation with iron alone versus no treatment/placebo

Outcome: 34 Side effects (any reported throughout the intervention period) (ALL)

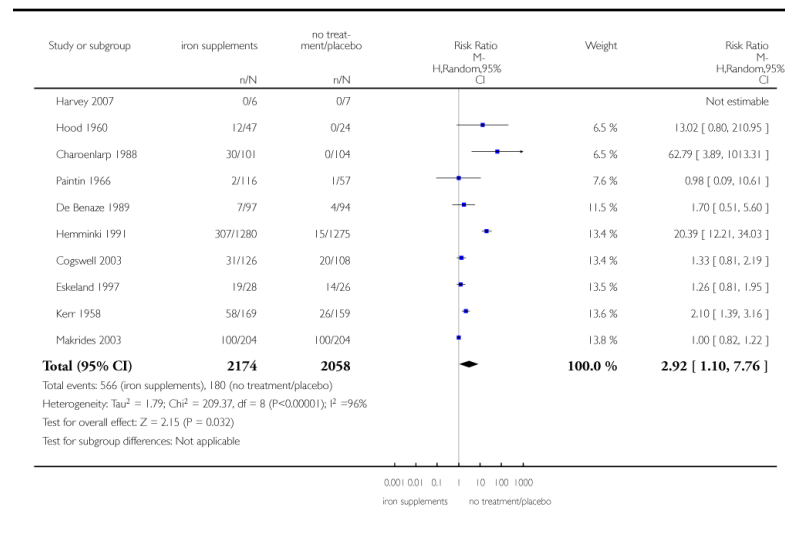

### Analysis 3.35. Comparison 3 Supplementation with iron alone versus no treatment/placebo, Outcome 35 Side effects (any reported throughout the intervention period): SUBGROUP ANALYSIS by gestational age at the start of supplementation.

Review: Daily oral iron supplementation during pregnancy

Comparison: 3 Supplementation with iron alone versus no treatment/placebo

Outcome: 35 Side effects (any reported throughout the intervention period): SUBGROUP ANALYSIS by gestational age at the start of supplementation

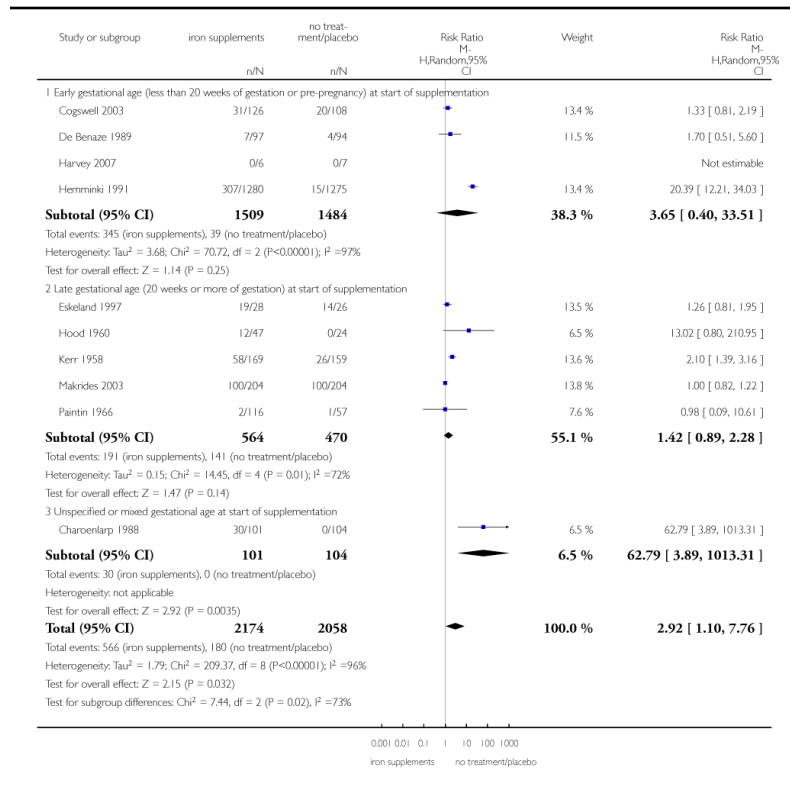

**Analysis 3.36. Comparison 3 Supplementation with iron alone versus no treatment/placebo, Outcome 36 Side effects (any reported throughout the intervention period): SUBGROUP ANALYSIS by anaemia status at the start of supplementation.**

Review: Daily oral iron supplementation during pregnancy

Comparison: 3 Supplementation with iron alone versus no treatment/placebo

Outcome: 36 Side effects (any reported throughout the intervention period): SUBGROUP ANALYSIS by anaemia status at the start of supplementation

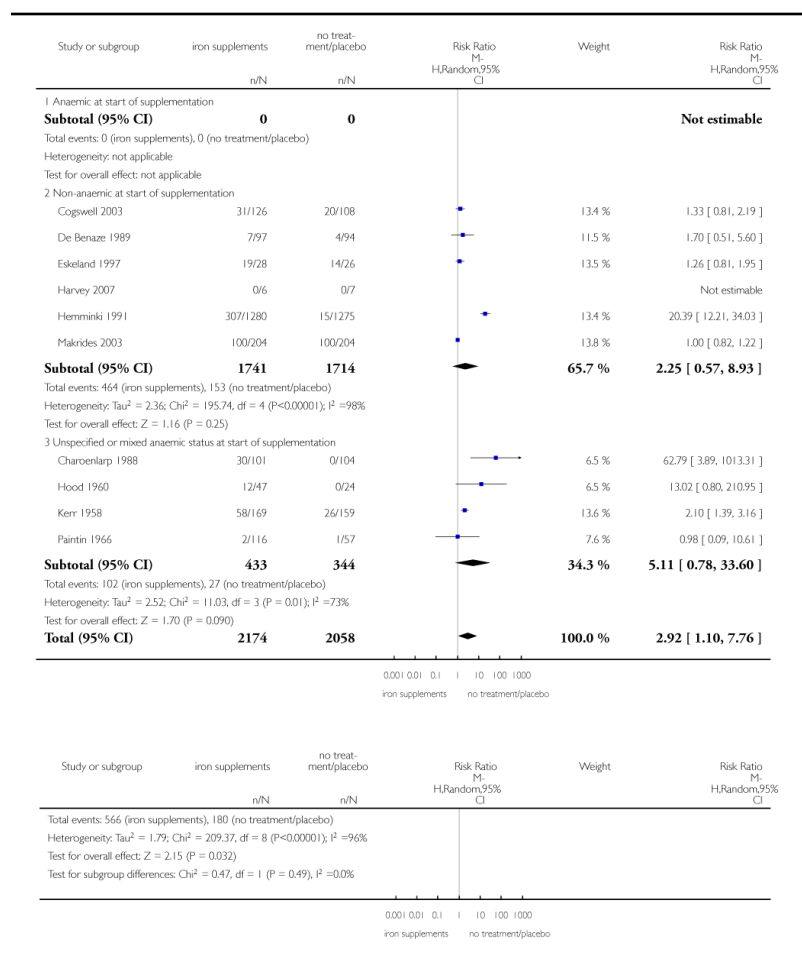

**Analysis 3.37. Comparison 3 Supplementation with iron alone versus no treatment/placebo, Outcome 37 Side effects (any reported throughout the intervention period): SUBGROUP ANALYSIS by dose of iron.**

Review: Daily oral iron supplementation during pregnancy

Comparison: 3 Supplementation with iron alone versus no treatment/placebo

Outcome: 37 Side effects (any reported throughout the intervention period): SUBGROUP ANALYSIS by dose of iron



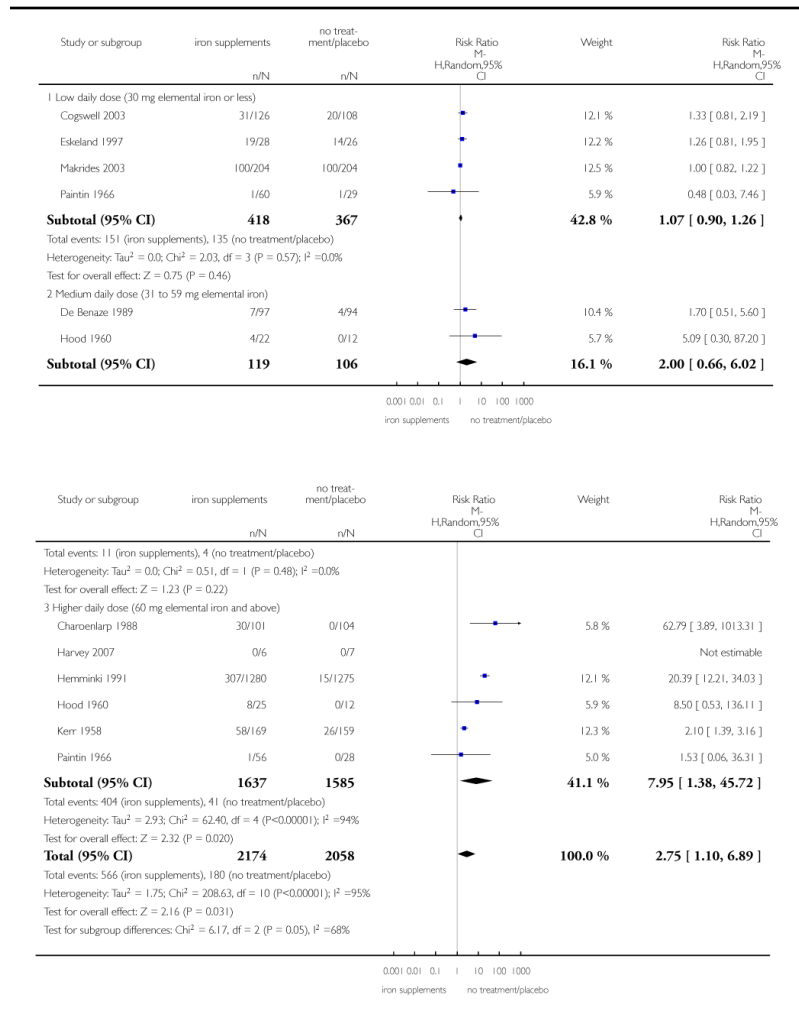

**Analysis 3.38. Comparison 3 Supplementation with iron alone versus no treatment/placebo, Outcome 38 Side effects (any reported throughout the intervention period): SUBGROUP ANALYSIS by malarial status of setting.**

Review: Daily oral iron supplementation during pregnancy

Comparison: 3 Supplementation with iron alone versus no treatment/placebo

Outcome: 38 Side effects (any reported throughout the intervention period): SUBGROUP ANALYSIS by malarial status of setting

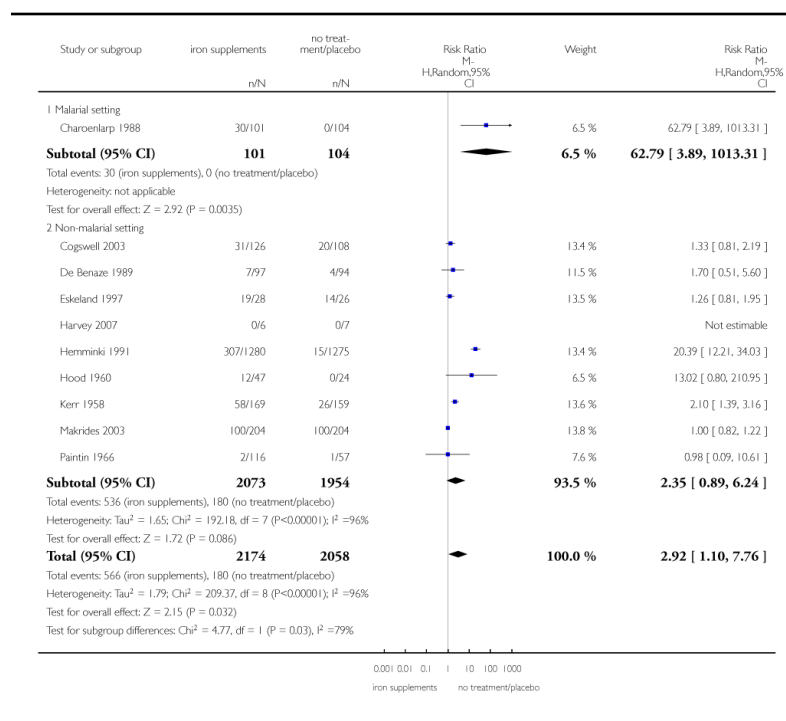

### Analysis 3.39. Comparison 3 Supplementation with iron alone versus no treatment/placebo, Outcome 39 Maternal severe anaemia at any time during second and third trimester (Hb less than 70 g/L) (ALL)

Review: Daily oral iron supplementation during pregnancy

Comparison: 3 Supplementation with iron alone versus no treatment/placebo

Outcome: 39 Maternal severe anaemia at any time during second and third trimester (Hb less than 70 g/L) (ALL)

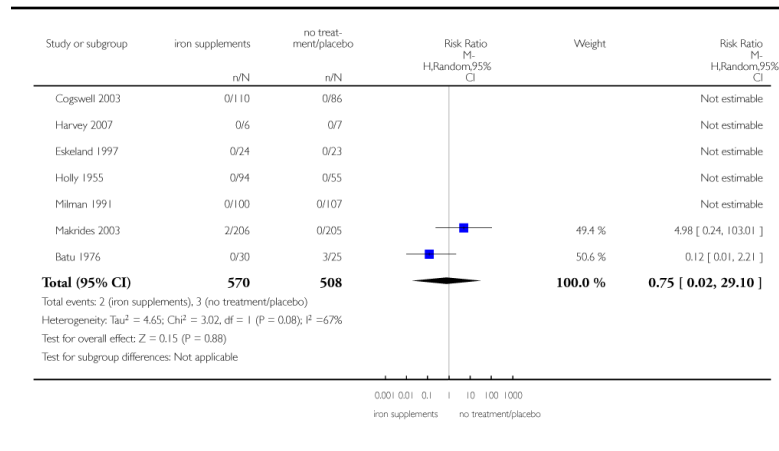

**Analysis 3.40. Comparison 3 Supplementation with iron alone versus no treatment/placebo, Outcome 40 Maternal severe anaemia at any time during second and third trimester (Hb less than 70 g/L): SUBGROUP ANALYSIS by gestational age at the start of supplementation.**

Review: Daily oral iron supplementation during pregnancy

Comparison: 3 Supplementation with iron alone versus no treatment/placebo

Outcome: 40 Maternal severe anaemia at any time during second and third trimester (Hb less than 70 g/L): SUBGROUP ANALYSIS by gestational age at the start of supplementation

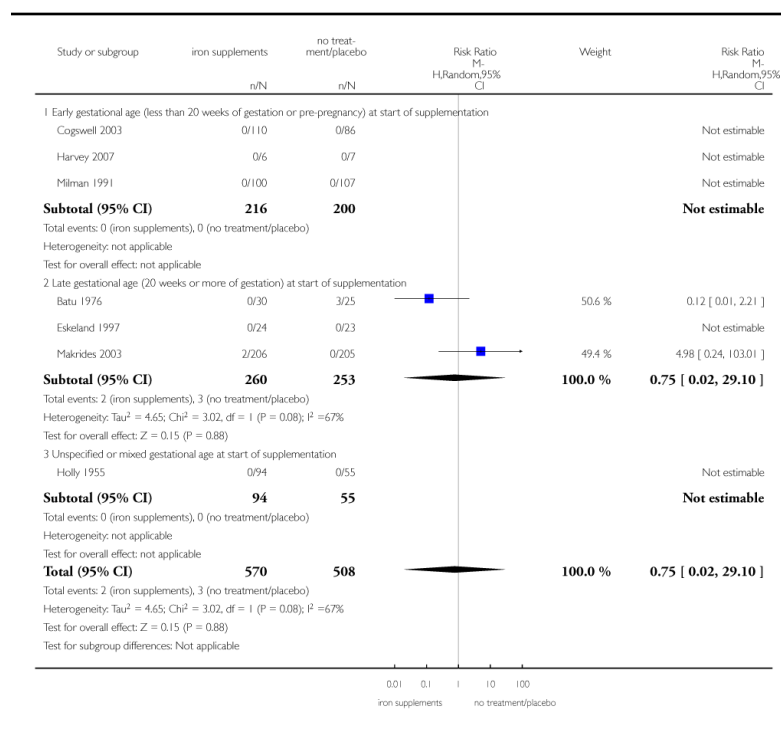

### Analysis 3.41. Comparison 3 Supplementation with iron alone versus no treatment/placebo, Outcome 41 Maternal severe anaemia at any time during second and third trimester (Hb less than 70 g/L): SUBGROUP ANALYSIS by anaemia status age at the start of supplementation.

Review: Daily oral iron supplementation during pregnancy

Comparison: 3 Supplementation with iron alone versus no treatment/placebo

Outcome: 41 Maternal severe anaemia at any time during second and third trimester (Hb less than 70 g/L): SUBGROUP ANALYSIS by anaemia status age at the start of supplementation

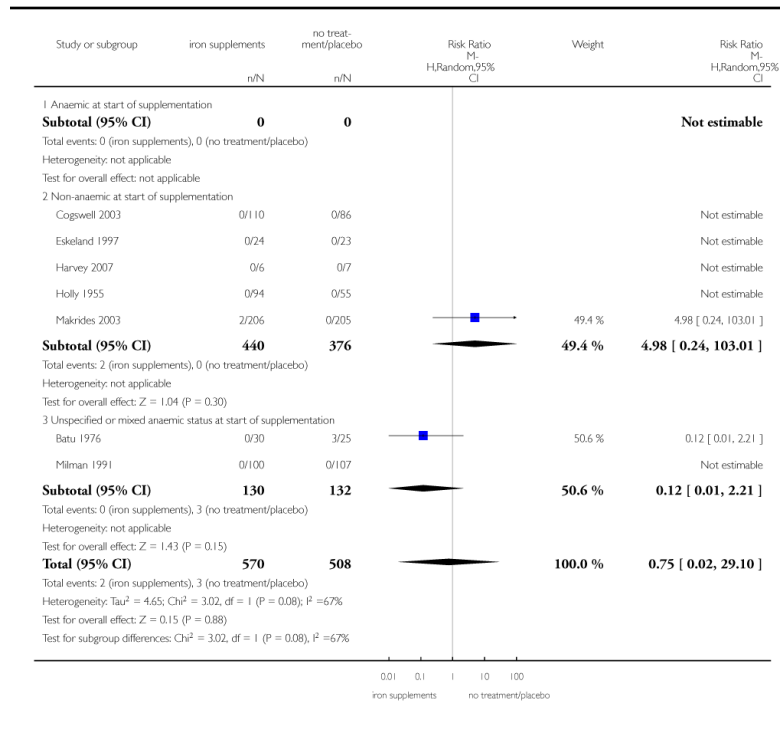

### Analysis 3.42. Comparison 3 Supplementation with iron alone versus no treatment/placebo, Outcome 42 Maternal severe anaemia at any time during second and third trimester (Hb less than 70 g/L): SUBGROUP ANALYSIS by dose of iron.

Review: Daily oral iron supplementation during pregnancy

Comparison: 3 Supplementation with iron alone versus no treatment/placebo

Outcome: 42 Maternal severe anaemia at any time during second and third trimester (Hb less than 70 g/L): SUBGROUP ANALYSIS by dose of iron

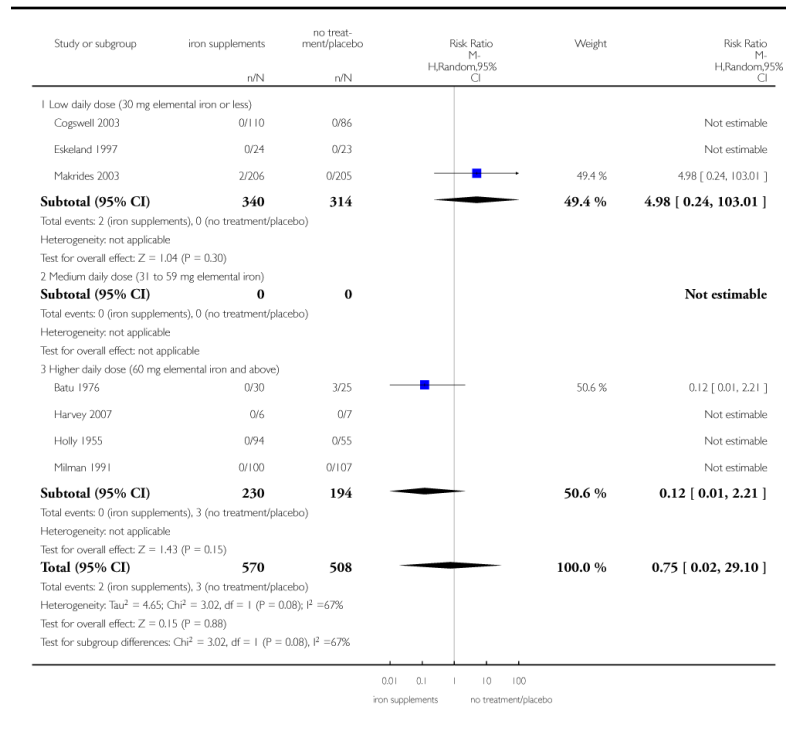

### Analysis 3.43. Comparison 3 Supplementation with iron alone versus no treatment/placebo, Outcome 43 Maternal severe anaemia at any time during second and third trimester (Hb less than 70 g/L): SUBGROUP ANALYSIS by malarial status of setting.

Review: Daily oral iron supplementation during pregnancy

Comparison: 3 Supplementation with iron alone versus no treatment/placebo

Outcome: 43 Maternal severe anaemia at any time during second and third trimester (Hb less than 70 g/L): SUBGROUP ANALYSIS by malarial status of setting

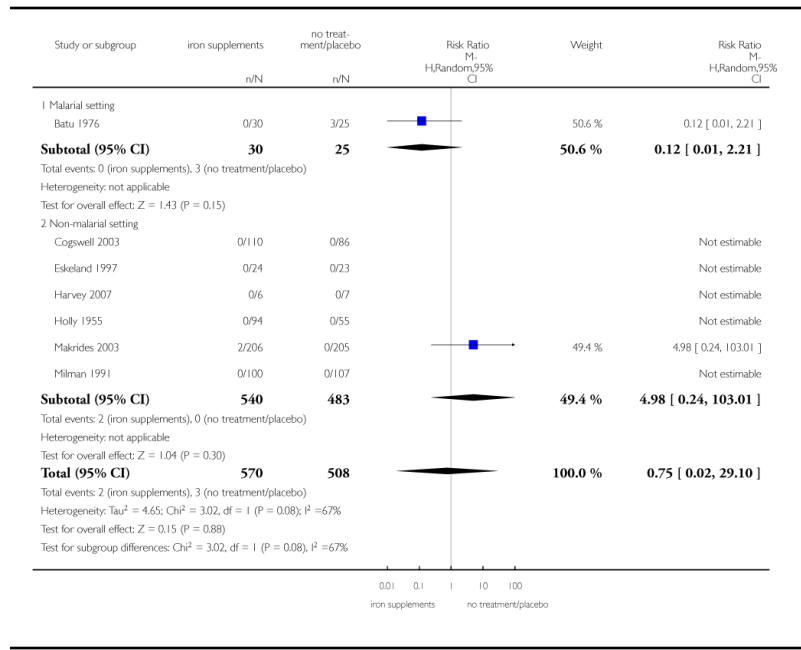

### Analysis 3.45. Comparison 3 Supplementation with iron alone versus no treatment/placebo, Outcome 45 Infection during pregnancy (including urinary tract infections) (ALL)

Review: Daily oral iron supplementation during pregnancy

Comparison: 3 Supplementation with iron alone versus no treatment/placebo

Outcome: 45 Infection during pregnancy (including urinary tract infections) (ALL)

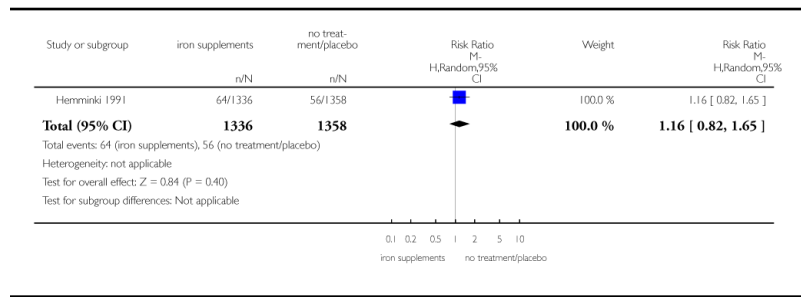

### Analysis 3.46. Comparison 3 Supplementation with iron alone versus no treatment/placebo, Outcome 46 Very low birthweight (less than 1500 g) (ALL)

Review: Daily oral iron supplementation during pregnancy

Comparison: 3 Supplementation with iron alone versus no treatment/placebo

Outcome: 46 Very low birthweight (less than 1500 g) (ALL)

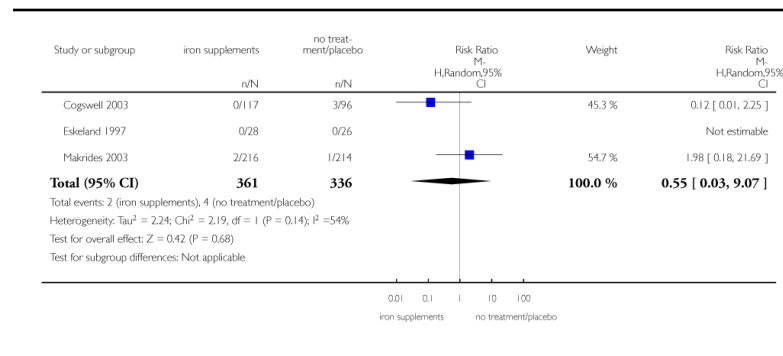

### Analysis 3.47. Comparison 3 Supplementation with iron alone versus no treatment/placebo, Outcome 47 Very premature birth (less than 34 weeks' gestation) (ALL)

Review: Daily oral iron supplementation during pregnancy

Comparison: 3 Supplementation with iron alone versus no treatment/placebo

Outcome: 47 Very premature birth (less than 34 weeks' gestation) (ALL)

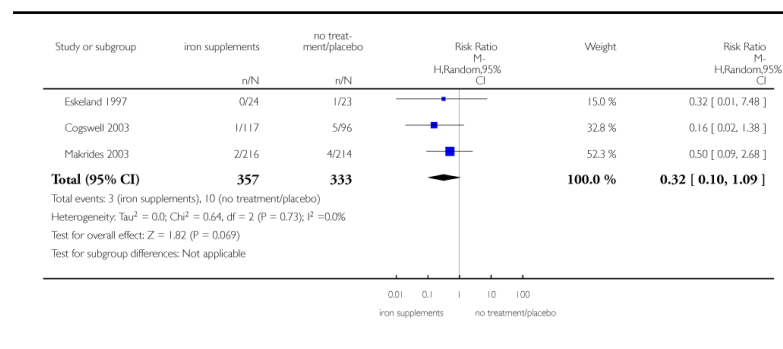



### Analysis 3.48. Comparison 3 Supplementation with iron alone versus no treatment/placebo, Outcome 48 Infant Hb concentration in the first 6 months (in g/L, counting the last reported measure after birth within this period) (ALL)

Review: Daily oral iron supplementation during pregnancy

Comparison: 3 Supplementation with iron alone versus no treatment/placebo

Outcome: 48 Infant Hb concentration in the first 6 months (in g/L, counting the last reported measure after birth within this period) (ALL)

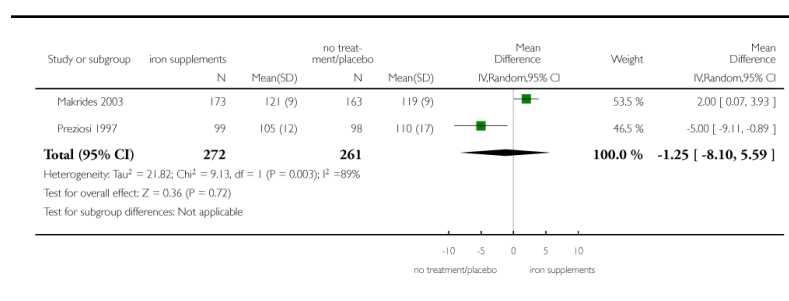

### Analysis 3.49. Comparison 3 Supplementation with iron alone versus no treatment/placebo, Outcome 49 Infant serum ferritin concentration in the first 6 months (in µg/L, counting the last reported measure after birth within this period) (ALL)

Review: Daily oral iron supplementation during pregnancy

Comparison: 3 Supplementation with iron alone versus no treatment/placebo

Outcome: 49 Infant serum ferritin concentration in the first 6 months (in µg/L, counting the last reported measure after birth within this period) (ALL)

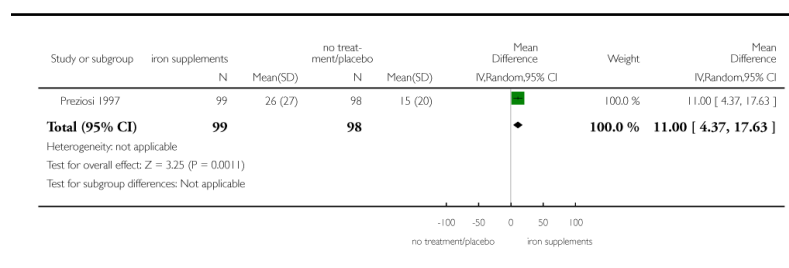

### Analysis 3.50. Comparison 3 Supplementation with iron alone versus no treatment/placebo, Outcome 50 Admission to special care unit (ALL)

Review: Daily oral iron supplementation during pregnancy

Comparison: 3 Supplementation with iron alone versus no treatment/placebo

Outcome: 50 Admission to special care unit (ALL)

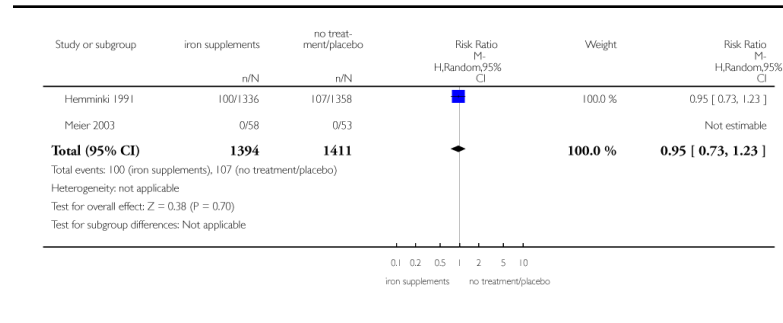

### Analysis 3.51. Comparison 3 Supplementation with iron alone versus no treatment/placebo, Outcome 51 Maternal anaemia at or near term (Hb less than 110 g/L at 34 weeks' gestation or more) (ALL)

Review: Daily oral iron supplementation during pregnancy

Comparison: 3 Supplementation with iron alone versus no treatment/placebo

Outcome: 51 Maternal anaemia at or near term (Hb less than 110 g/L at 34 weeks' gestation or more) (ALL)

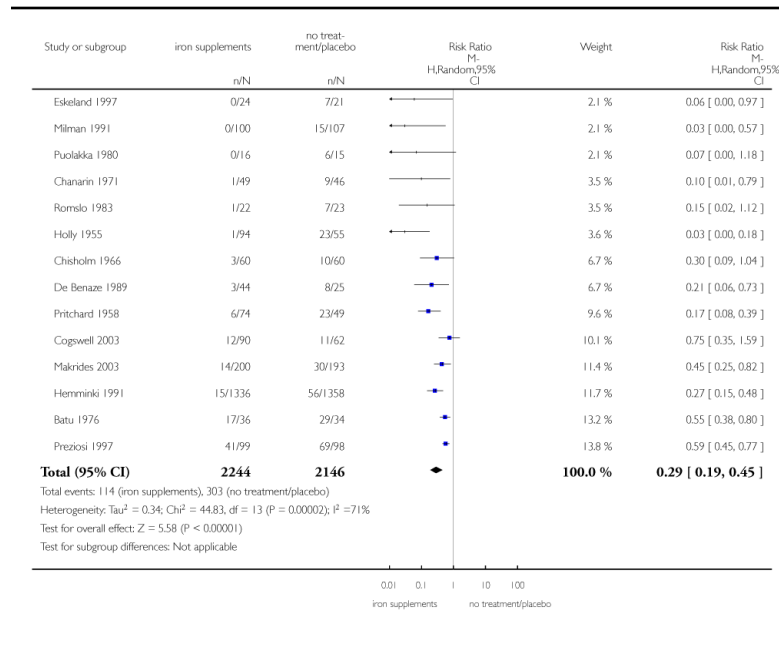

**Analysis 3.52. Comparison 3 Supplementation with iron alone versus no treatment/placebo, Outcome 52 Maternal iron deficiency at or near term (as defined by trialists, based on any indicator of iron status at 34 weeks' gestation or more) (ALL)**

Review: Daily oral iron supplementation during pregnancy

Comparison: 3 Supplementation with iron alone versus no treatment/placebo

Outcome: 52 Maternal iron deficiency at or near term (as defined by trialists, based on any indicator of iron status at 34 weeks' gestation or more) (ALL)

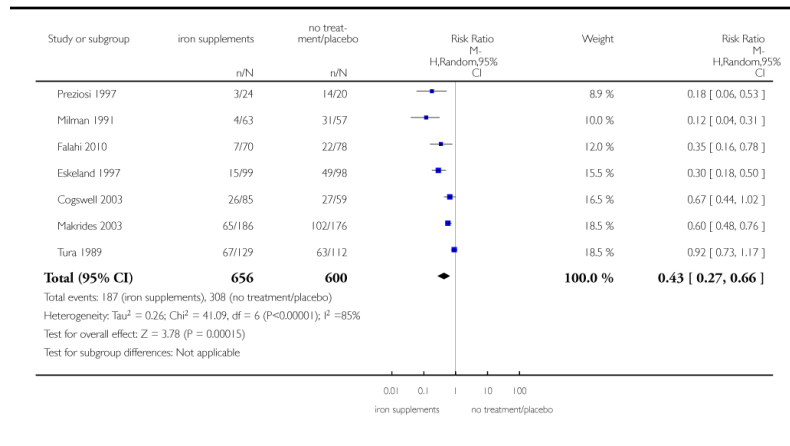

**Analysis 3.53. Comparison 3 Supplementation with iron alone versus no treatment/placebo, Outcome 53 Maternal iron-deficiency anaemia at or near term (Hb less than 110 g/L and at least one additional laboratory indicators at 34 weeks' gestation or more) (ALL)**

Review: Daily oral iron supplementation during pregnancy

Comparison: 3 Supplementation with iron alone versus no treatment/placebo

Outcome: 53 Maternal iron-deficiency anaemia at or near term (Hb less than 110 g/L and at least one additional laboratory indicators at 34 weeks' gestation or more) (ALL)

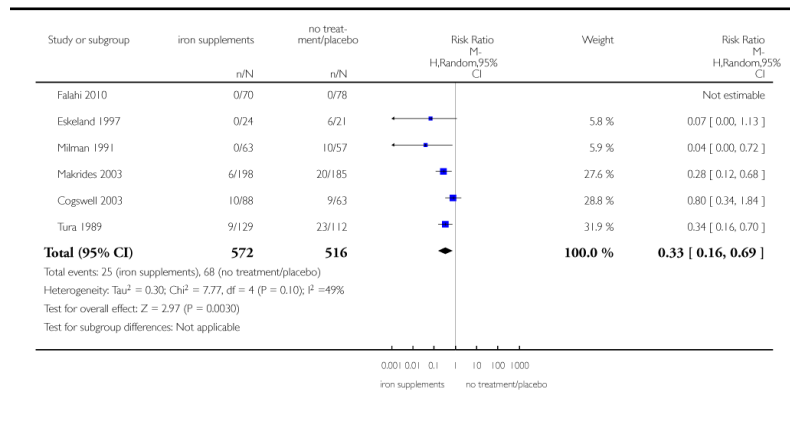

### Analysis 3.54. Comparison 3 Supplementation with iron alone versus no treatment/placebo, Outcome 54 Maternal Hb concentration at or near term (in g/L, at 34 weeks' gestation or more) (ALL)

Review: Daily oral iron supplementation during pregnancy

Comparison: 3 Supplementation with iron alone versus no treatment/placebo

Outcome: 54 Maternal Hb concentration at or near term (in g/L, at 34 weeks' gestation or more) (ALL)

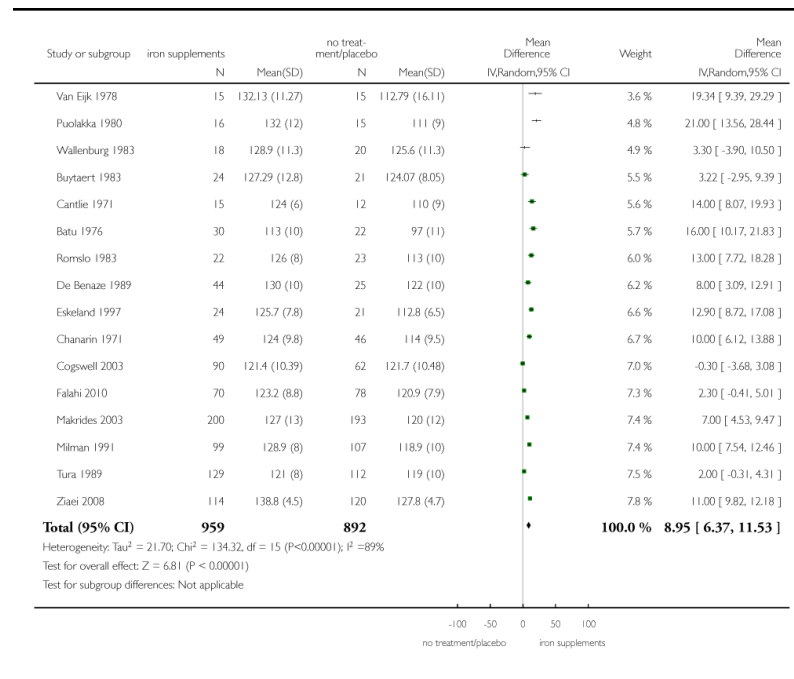

### Analysis 3.55. Comparison 3 Supplementation with iron alone versus no treatment/placebo, Outcome 55 Maternal Hb concentration within 6 wk postpartum (in g/L) (ALL)

Review: Daily oral iron supplementation during pregnancy

Comparison: 3 Supplementation with iron alone versus no treatment/placebo

Outcome: 55 Maternal Hb concentration within 6 wk postpartum (in g/L) (ALL)

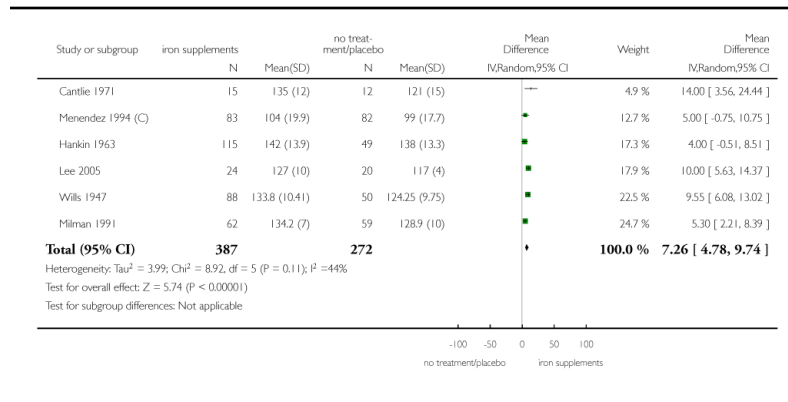

### Analysis 3.56. Comparison 3 Supplementation with iron alone versus no treatment/placebo, Outcome 56 Maternal high haemoglobin concentrations during second or third trimester (Hb more than 130 g/L) (ALL)

Review: Daily oral iron supplementation during pregnancy

Comparison: 3 Supplementation with iron alone versus no treatment/placebo

Outcome: 56 Maternal high haemoglobin concentrations during second or third trimester (Hb more than 130 g/L) (ALL)

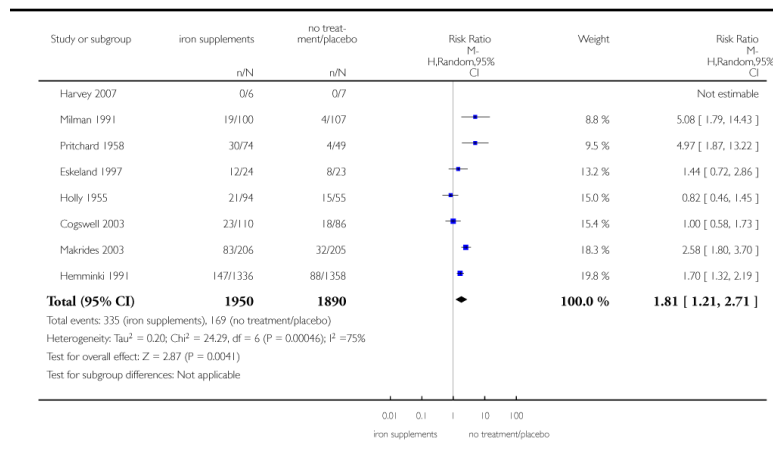

### Analysis 3.57. Comparison 3 Supplementation with iron alone versus no treatment/placebo, Outcome 57 Maternal high haemoglobin concentrations at or near term (Hb more than 130 g/L at 34 weeks' gestation or more) (ALL)

Review: Daily oral iron supplementation during pregnancy

Comparison: 3 Supplementation with iron alone versus no treatment/placebo

Outcome: 57 Maternal high haemoglobin concentrations at or near term (Hb more than 130 g/L at 34 weeks' gestation or more) (ALL)

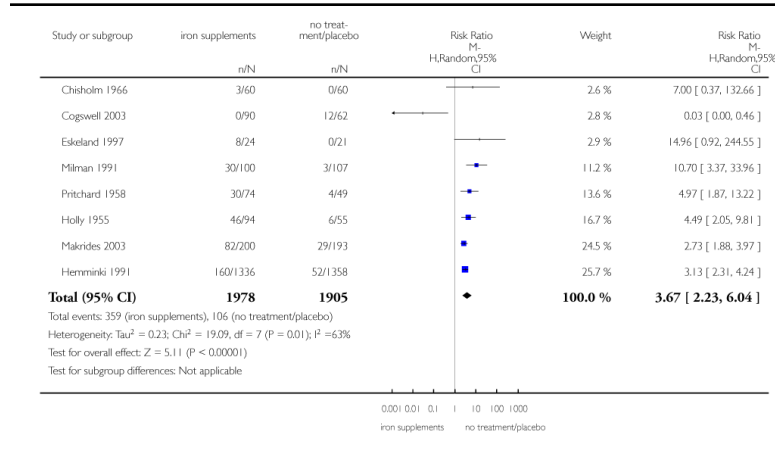

**Analysis 3.58. Comparison 3 Supplementation with iron alone versus no treatment/placebo, Outcome 58 Moderate anaemia at postpartum (Hb more than 80 g/L and less than 110 g/L) (ALL)**

Review: Daily oral iron supplementation during pregnancy

Comparison: 3 Supplementation with iron alone versus no treatment/placebo

Outcome: 58 Moderate anaemia at postpartum (Hb more than 80 g/L and less than 110 g/L) (ALL)

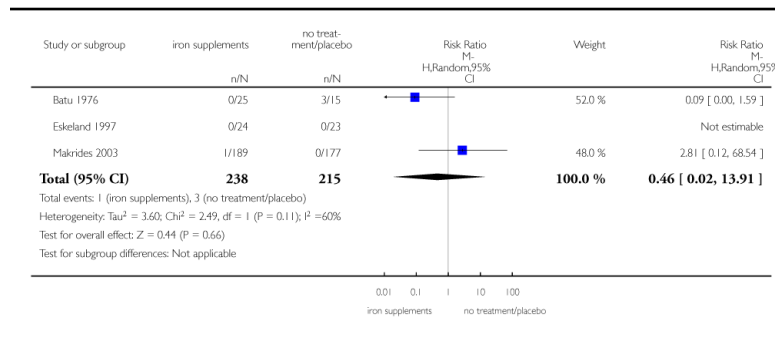

### Analysis 3.59. Comparison 3 Supplementation with iron alone versus no treatment/placebo, Outcome 59 Maternal severe anaemia at or near term (Hb less than 70 g/L at 34 weeks' gestation or more) (ALL)

Review: Daily oral iron supplementation during pregnancy

Comparison: 3 Supplementation with iron alone versus no treatment/placebo

Outcome: 59 Maternal severe anaemia at or near term (Hb less than 70 g/L at 34 weeks' gestation or more) (ALL)

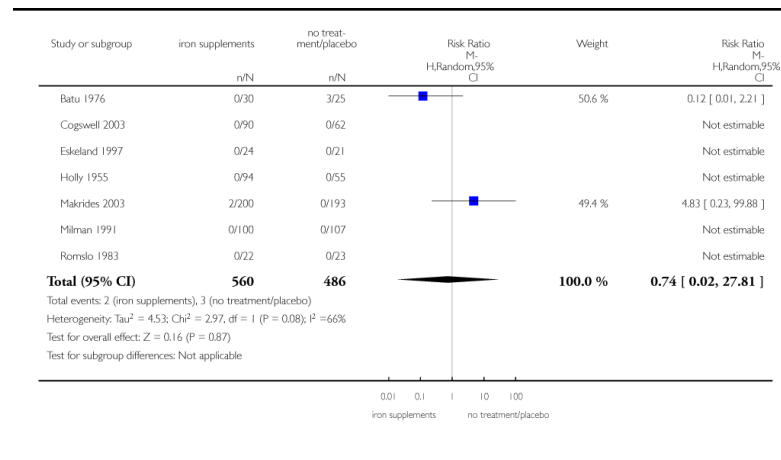

### Analysis 3.60. Comparison 3 Supplementation with iron alone versus no treatment/placebo, Outcome 60 Severe anaemia at postpartum (Hb less than 80 g/L) (ALL)

Review: Daily oral iron supplementation during pregnancy

Comparison: 3 Supplementation with iron alone versus no treatment/placebo

Outcome: 60 Severe anaemia at postpartum (Hb less than 80 g/L) (ALL)



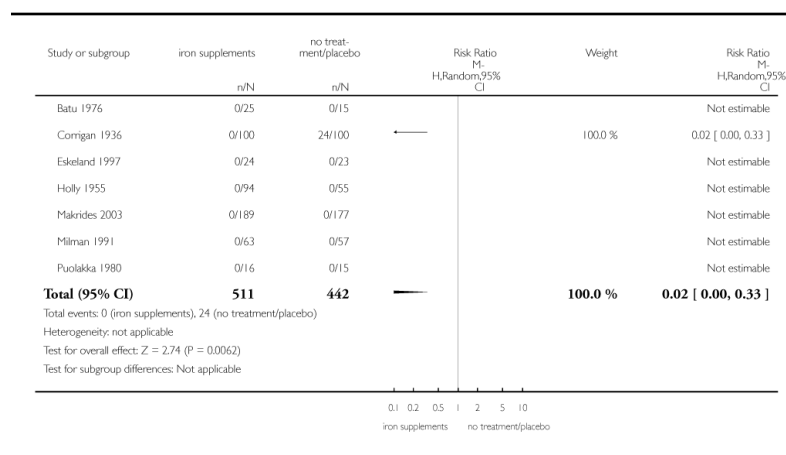

### Analysis 3.61. Comparison 3 Supplementation with iron alone versus no treatment/placebo, Outcome 61 Puerperal infection (ALL)

Review: Daily oral iron supplementation during pregnancy

Comparison: 3 Supplementation with iron alone versus no treatment/placebo

Outcome: 61 Puerperal infection (ALL)

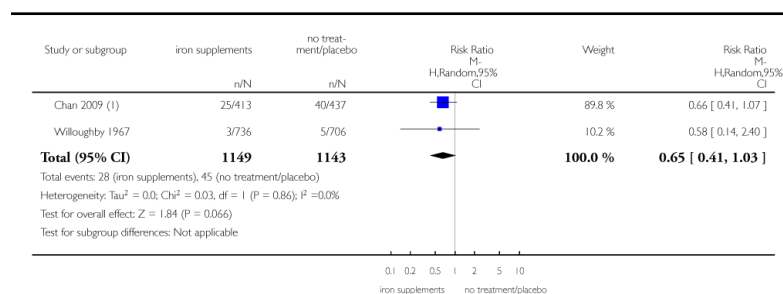

(1) Described as infections in hospital

### Analysis 3.62. Comparison 3 Supplementation with iron alone versus no treatment/placebo, Outcome 62 Antepartum haemorrhage (ALL)

Review: Daily oral iron supplementation during pregnancy

Comparison: 3 Supplementation with iron alone versus no treatment/placebo

Outcome: 62 Antepartum haemorrhage (ALL)

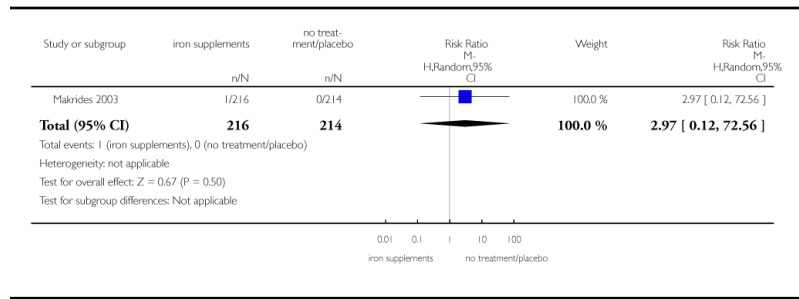

### Analysis 3.63. Comparison 3 Supplementation with iron alone versus no treatment/placebo, Outcome 63 Postpartum haemorrhage (ALL)

Review: Daily oral iron supplementation during pregnancy

Comparison: 3 Supplementation with iron alone versus no treatment/placebo

Outcome: 63 Postpartum haemorrhage (ALL)

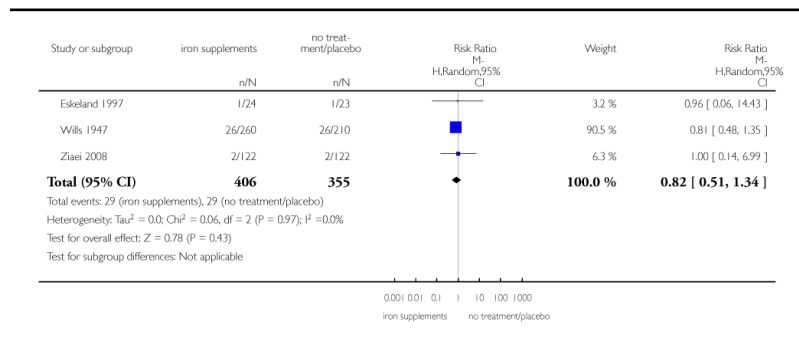

### Analysis 3.64. Comparison 3 Supplementation with iron alone versus no treatment/placebo, Outcome 64 Transfusion provided (ALL)

Review: Daily oral iron supplementation during pregnancy

Comparison: 3 Supplementation with iron alone versus no treatment/placebo

Outcome: 64 Transfusion provided (ALL)

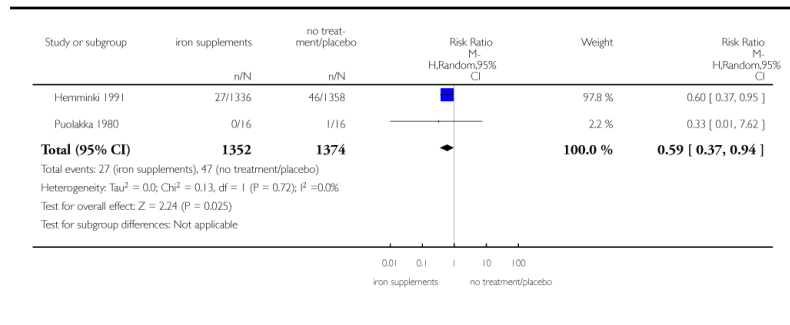

### Analysis 3.65. Comparison 3 Supplementation with iron alone versus no treatment/placebo, Outcome 65 Diarrhoea (ALL)

Review: Daily oral iron supplementation during pregnancy

Comparison: 3 Supplementation with iron alone versus no treatment/placebo

Outcome: 65 Diarrhoea (ALL)

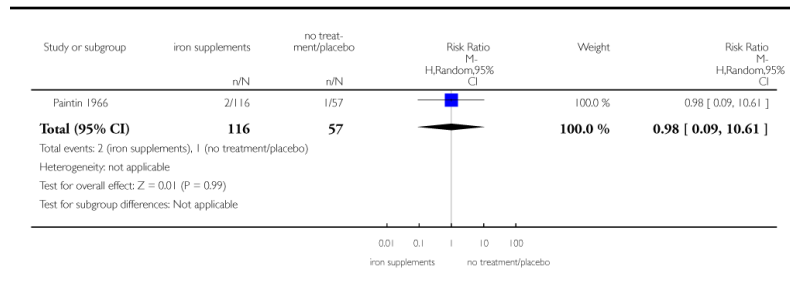

### Analysis 3.66. Comparison 3 Supplementation with iron alone versus no treatment/placebo, Outcome 66 Constipation (ALL)

Review: Daily oral iron supplementation during pregnancy

Comparison: 3 Supplementation with iron alone versus no treatment/placebo

Outcome: 66 Constipation (ALL)

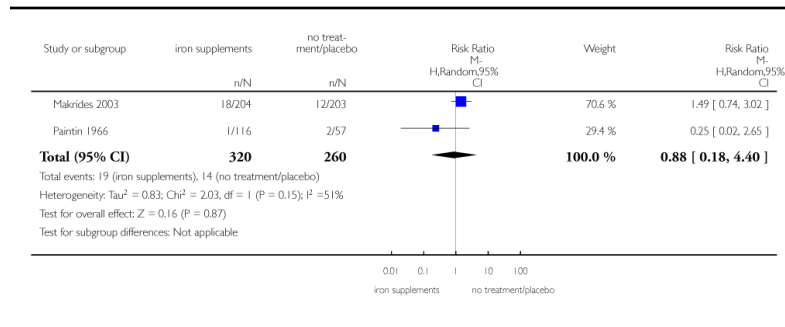

### Analysis 3.67. Comparison 3 Supplementation with iron alone versus no treatment/placebo, Outcome 67 Nausea (ALL)

Review: Daily oral iron supplementation during pregnancy

Comparison: 3 Supplementation with iron alone versus no treatment/placebo

Outcome: 67 Nausea (ALL)

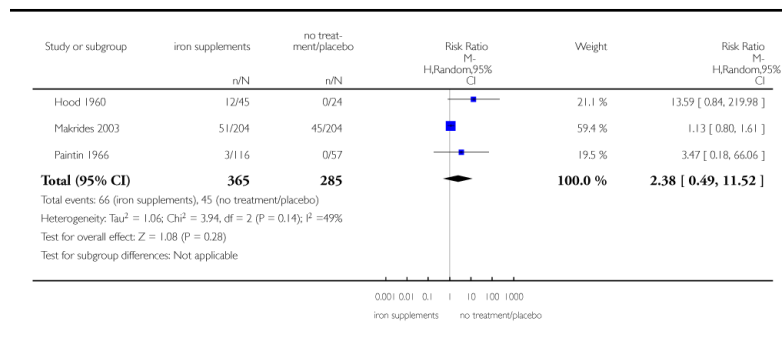

### Analysis 3.68. Comparison 3 Supplementation with iron alone versus no treatment/placebo, Outcome 68 Heartburn (ALL)

Review: Daily oral iron supplementation during pregnancy

Comparison: 3 Supplementation with iron alone versus no treatment/placebo

Outcome: 68 Heartburn (ALL)

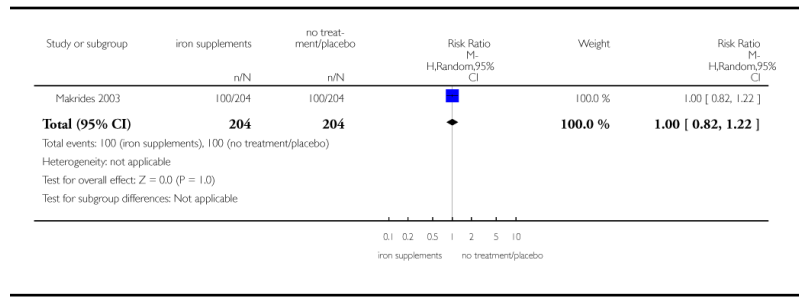

### Analysis 3.69. Comparison 3 Supplementation with iron alone versus no treatment/placebo, Outcome 69 Vomiting (ALL)

Review: Daily oral iron supplementation during pregnancy

Comparison: 3 Supplementation with iron alone versus no treatment/placebo

Outcome: 69 Vomiting (ALL)

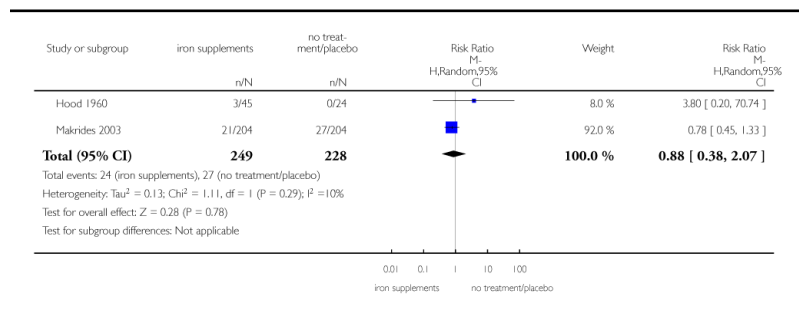

### Analysis 3.70. Comparison 3 Supplementation with iron alone versus no treatment/placebo, Outcome 70 Maternal wellbeing/satisfaction (ALL)

Review: Daily oral iron supplementation during pregnancy

Comparison: 3 Supplementation with iron alone versus no treatment/placebo

Outcome: 70 Maternal wellbeing/satisfaction (ALL)

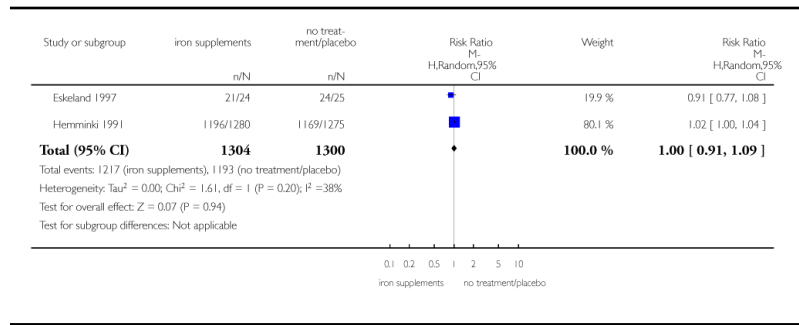

### Analysis 3.71. Comparison 3 Supplementation with iron alone versus no treatment/placebo, Outcome 71 Placental abruption (ALL)

Review: Daily oral iron supplementation during pregnancy

Comparison: 3 Supplementation with iron alone versus no treatment/placebo

Outcome: 71 Placental abruption (ALL)

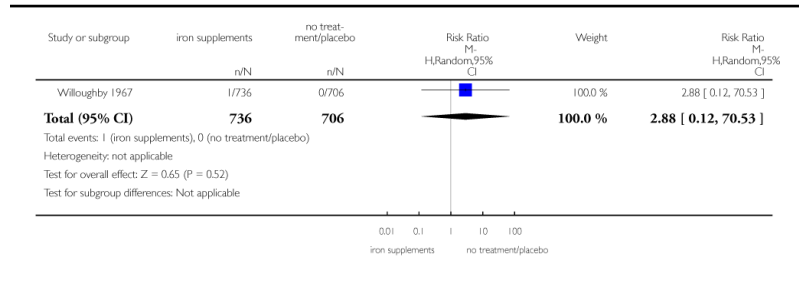

### Analysis 3.73. Comparison 3 Supplementation with iron alone versus no treatment/placebo, Outcome 73 Pre-eclampsia (ALL)

Review: Daily oral iron supplementation during pregnancy

Comparison: 3 Supplementation with iron alone versus no treatment/placebo

Outcome: 73 Pre-eclampsia (ALL)

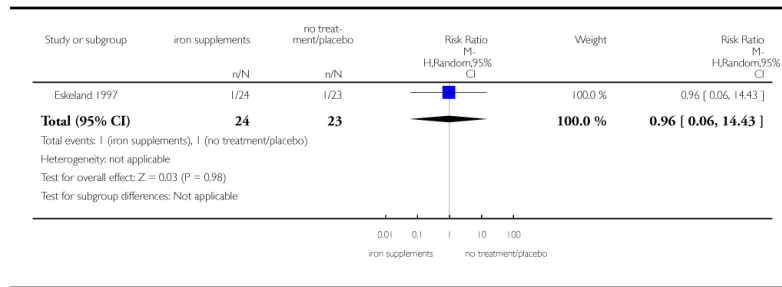

### Analysis 4.1. Comparison 4 Supplementation with iron+folic acid versus no treatment/placebo, Outcome 1 Low birthweight (less than 2500 g) (ALL)

Review: Daily oral iron supplementation during pregnancy

Comparison: 4 Supplementation with iron+folic acid versus no treatment/placebo

Outcome: 1 Low birthweight (less than 2500 g) (ALL)

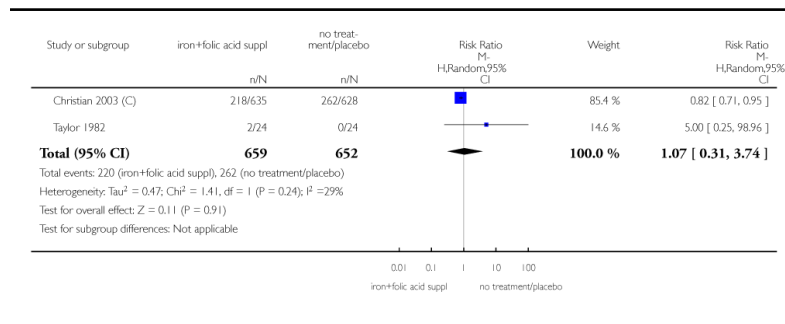

### Analysis 4.2. Comparison 4 Supplementation with iron+folic acid versus no treatment/placebo, Outcome 2 Birthweight (ALL)

Review: Daily oral iron supplementation during pregnancy

Comparison: 4 Supplementation with iron+folic acid versus no treatment/placebo

Outcome: 2 Birthweight (ALL)

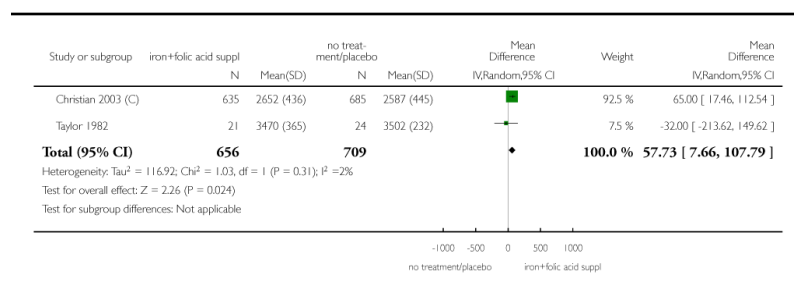

### Analysis 4.3. Comparison 4 Supplementation with iron+folic acid versus no treatment/placebo, Outcome 3 Premature birth (less than 37 weeks of gestation) (ALL)

Review: Daily oral iron supplementation during pregnancy

Comparison: 4 Supplementation with iron+folic acid versus no treatment/placebo

Outcome: 3 Premature birth (less than 37 weeks of gestation) (ALL)

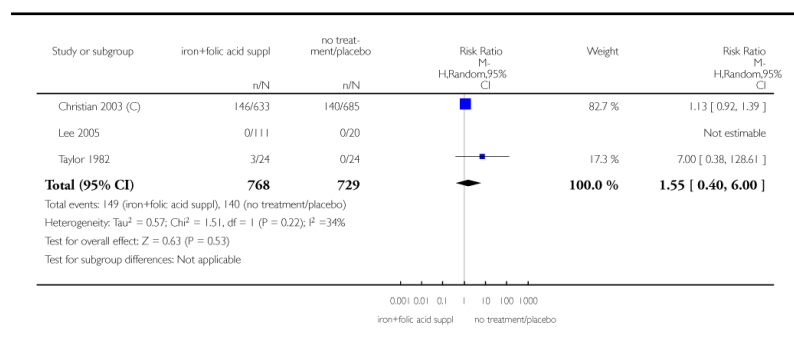

### Analysis 4.4. Comparison 4 Supplementation with iron+folic acid versus no treatment/placebo, Outcome 4 Premature birth (less than 37 weeks of gestation): SUBGROUP ANALYSIS by gestational age at the start of supplementation.

Review: Daily oral iron supplementation during pregnancy

Comparison: 4 Supplementation with iron+folic acid versus no treatment/placebo

Outcome: 4 Premature birth (less than 37 weeks of gestation): SUBGROUP ANALYSIS by gestational age at the start of supplementation



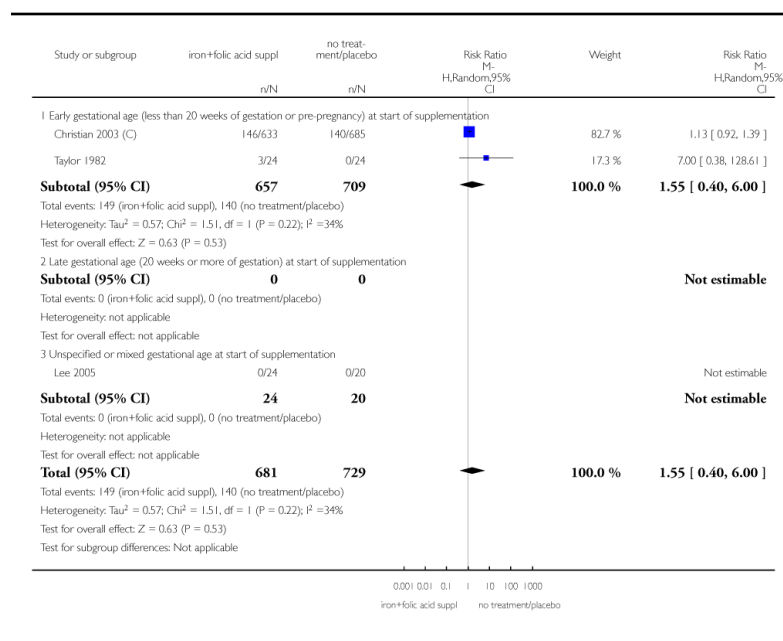

#### Analysis 4.5. Comparison 4 Supplementation with iron+folic acid versus no treatment/placebo, Outcome 5 Premature birth (less than 37 weeks of gestation): SUBGROUP ANALYSIS by anaemia status at the start of supplementation.

Review: Daily oral iron supplementation during pregnancy

Comparison: 4 Supplementation with iron+folic acid versus no treatment/placebo

Outcome: 5 Premature birth (less than 37 weeks of gestation): SUBGROUP ANALYSIS by anaemia status at the start of supplementation

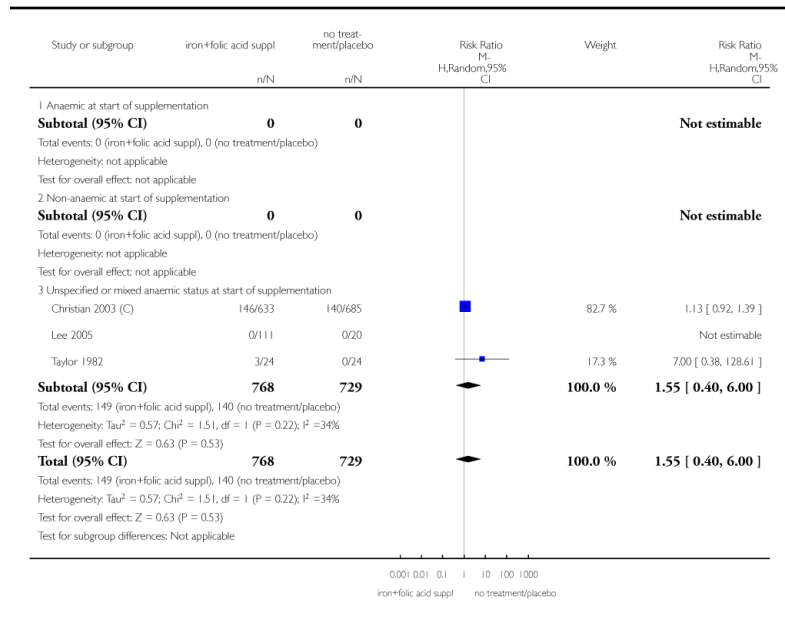

**Analysis 4.6. Comparison 4 Supplementation with iron+folic acid versus no treatment/placebo, Outcome 6 Premature birth (less than 37 weeks of gestation): SUBGROUP ANALYSIS by dose of iron.**

Review: Daily oral iron supplementation during pregnancy

Comparison: 4 Supplementation with iron+folic acid versus no treatment/placebo

Outcome: 6 Premature birth (less than 37 weeks of gestation): SUBGROUP ANALYSIS by dose of iron

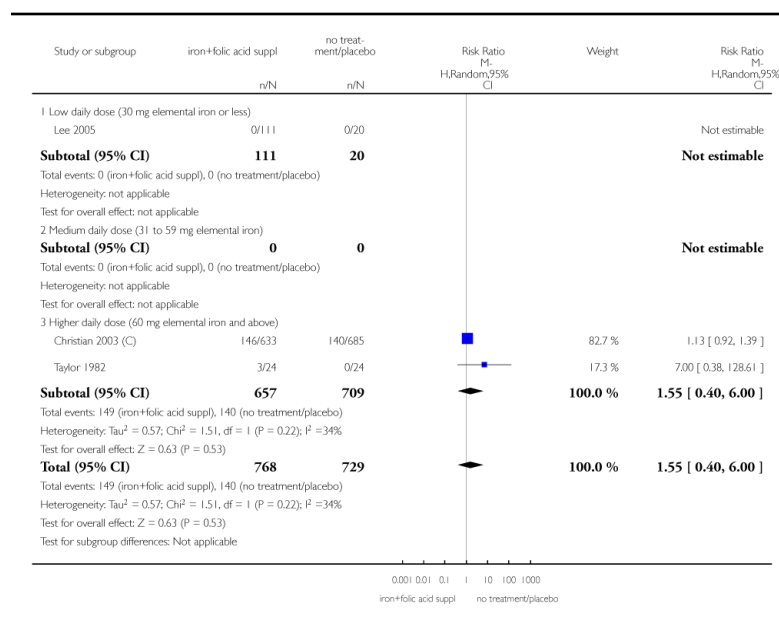

#### Analysis 4.7. Comparison 4 Supplementation with iron+folic acid versus no treatment/placebo, Outcome 7 Premature birth (less than 37 weeks of gestation): SUBGROUP ANALYSIS by malarial status of setting.

Review: Daily oral iron supplementation during pregnancy

Comparison: 4 Supplementation with iron+folic acid versus no treatment/placebo

Outcome: 7 Premature birth (less than 37 weeks of gestation): SUBGROUP ANALYSIS by malarial status of setting

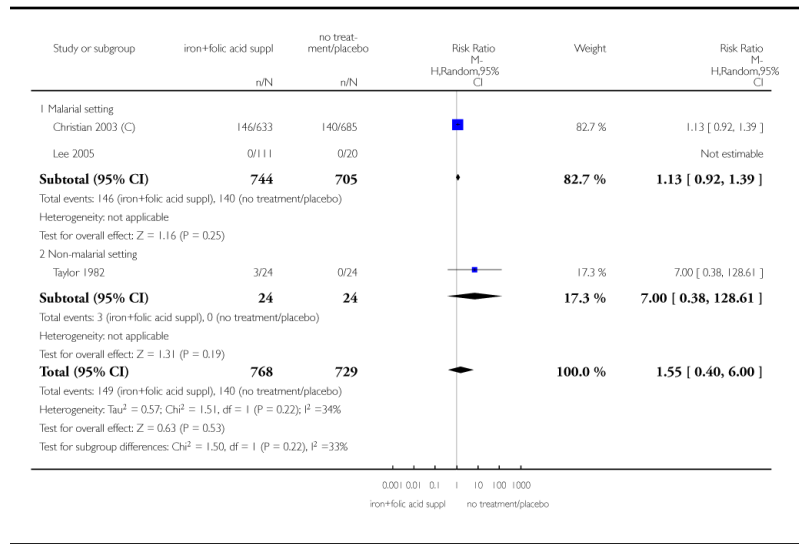

**Analysis 4.8. Comparison 4 Supplementation with iron+folic acid versus no treatment/placebo, Outcome 8 Neonatal death (within 28 days after delivery) (ALL)**

Review: Daily oral iron supplementation during pregnancy

Comparison: 4 Supplementation with iron+folic acid versus no treatment/placebo

Outcome: 8 Neonatal death (within 28 days after delivery) (ALL)

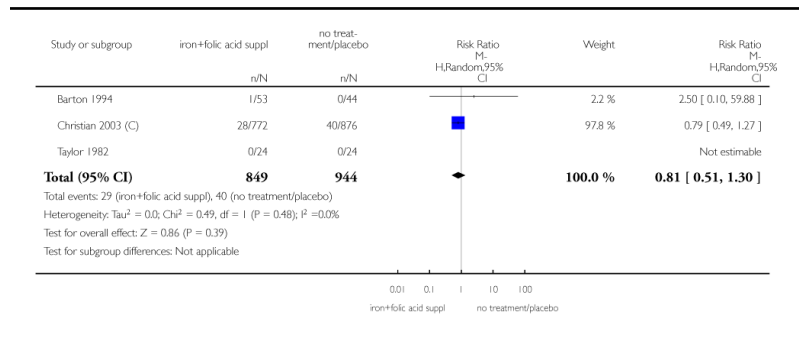

**Analysis 4.9. Comparison 4 Supplementation with iron+folic acid versus no treatment/placebo, Outcome 9 Neonatal death (within 28 days after delivery) (ALL)**

## delivery): SUBGROUP ANALYSIS by gestational age at start of supplementation.

Review: Daily oral iron supplementation during pregnancy

Comparison: 4 Supplementation with iron+folic acid versus no treatment/placebo

Outcome: 9 Neonatal death (within 28 days after delivery): SUBGROUP ANALYSIS by gestational age at start of supplementation

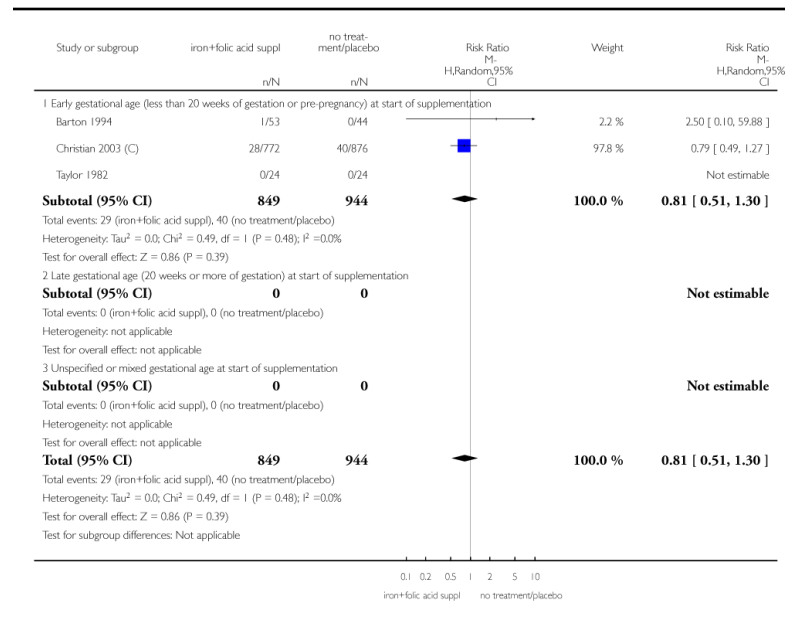

## Analysis 4.10. Comparison 4 Supplementation with iron+folic acid versus no treatment/placebo, Outcome 10 Neonatal death (within 28 days after delivery): SUBGROUP ANALYSIS by anaemia status at start of supplementation.

Review: Daily oral iron supplementation during pregnancy

Comparison: 4 Supplementation with iron+folic acid versus no treatment/placebo

Outcome: 10 Neonatal death (within 28 days after delivery): SUBGROUP ANALYSIS by anaemia status at start of supplementation

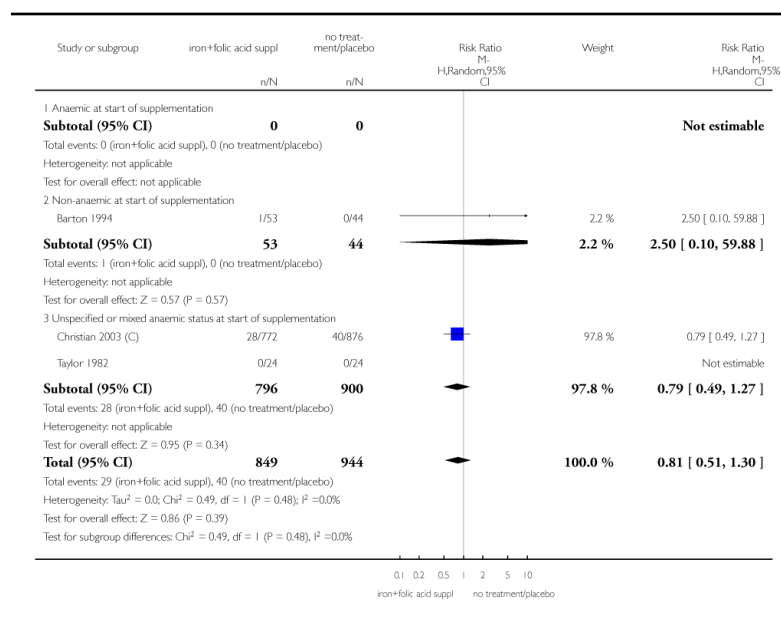

#### Analysis 4.11. Comparison 4 Supplementation with iron+folic acid versus no treatment/placebo, Outcome 11 Neonatal death (within 28 days after delivery): SUBGROUP ANALYSIS by dose of iron.

Review: Daily oral iron supplementation during pregnancy

Comparison: 4 Supplementation with iron+folic acid versus no treatment/placebo

Outcome: 11 Neonatal death (within 28 days after delivery): SUBGROUP ANALYSIS by dose of iron

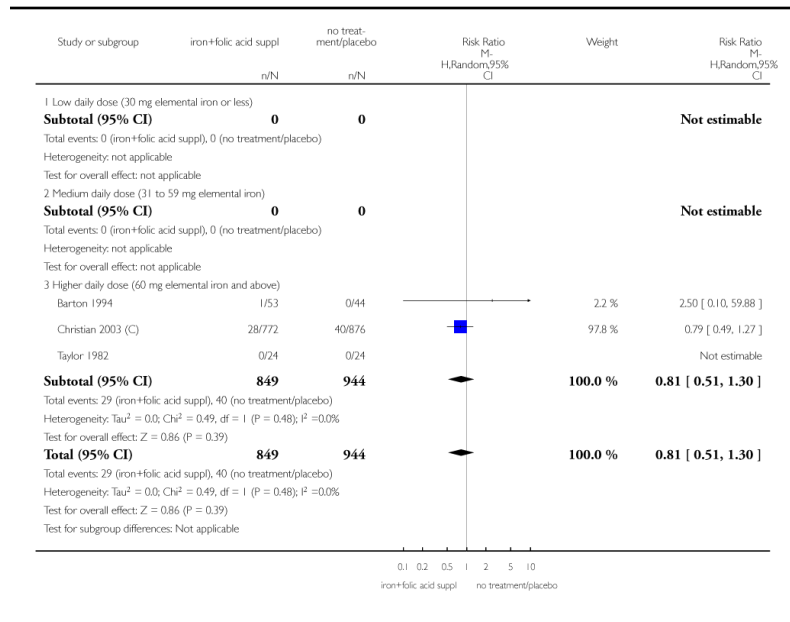

**Analysis 4.12. Comparison 4 Supplementation with iron+folic acid versus no treatment/placebo, Outcome 12 Neonatal death (within 28 days after delivery): SUBGROUP ANALYSIS by malarial status of setting.**

Review: Daily oral iron supplementation during pregnancy

Comparison: 4 Supplementation with iron+folic acid versus no treatment/placebo

Outcome: 12 Neonatal death (within 28 days after delivery): SUBGROUP ANALYSIS by malarial status of setting

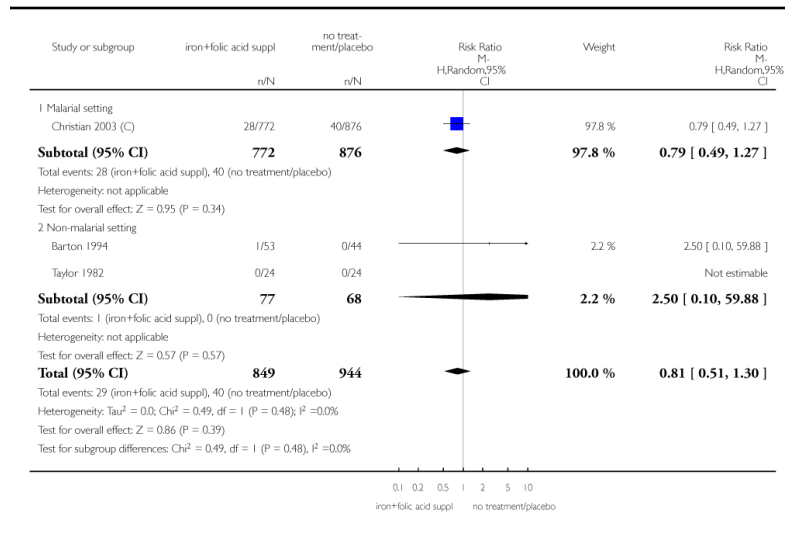

### Analysis 4.13. Comparison 4 Supplementation with iron+folic acid versus no treatment/placebo, Outcome 13 Congenital anomalies (ALL)

Review: Daily oral iron supplementation during pregnancy

Comparison: 4 Supplementation with iron+folic acid versus no treatment/placebo

Outcome: 13 Congenital anomalies (ALL)

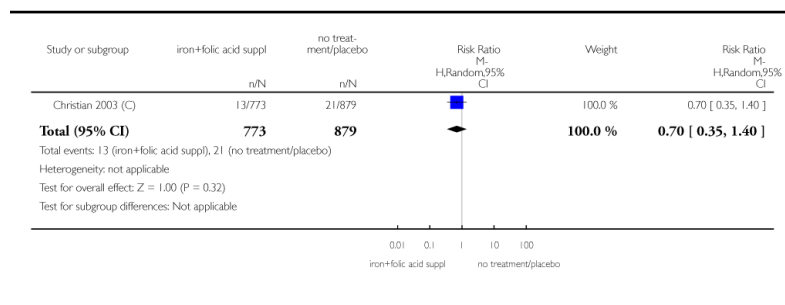

### Analysis 4.14. Comparison 4 Supplementation with iron+folic acid versus no treatment/placebo, Outcome 14 Maternal anaemia at term (Hb less than 110 g/L at 37 weeks' gestation or more) (ALL)

Review: Daily oral iron supplementation during pregnancy

Comparison: 4 Supplementation with iron+folic acid versus no treatment/placebo



Outcome: 14 Maternal anaemia at term (Hb less than 110 g/L at 37 weeks' gestation or more) (ALL)

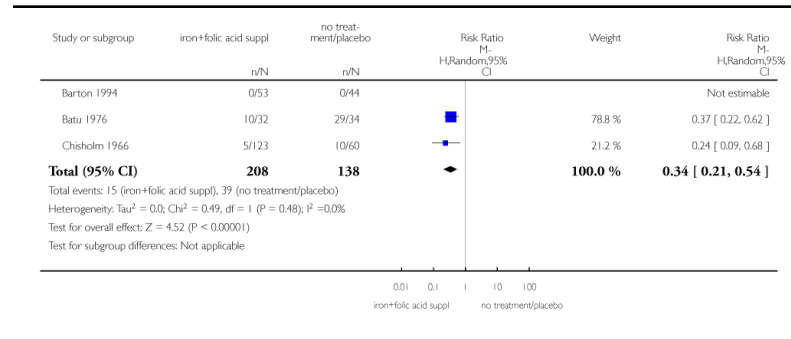

**Analysis 4.15. Comparison 4 Supplementation with iron+folic acid versus no treatment/placebo, Outcome 15 Maternal anaemia at term (Hb less than 110 g/L at 37 weeks' gestation or more): SUBGROUP ANALYSIS by gestational age at the start of supplementation.**

Review: Daily oral iron supplementation during pregnancy

Comparison: 4 Supplementation with iron+folic acid versus no treatment/placebo

Outcome: 15 Maternal anaemia at term (Hb less than 110 g/L at 37 weeks' gestation or more): SUBGROUP ANALYSIS by gestational age at the start of supplementation

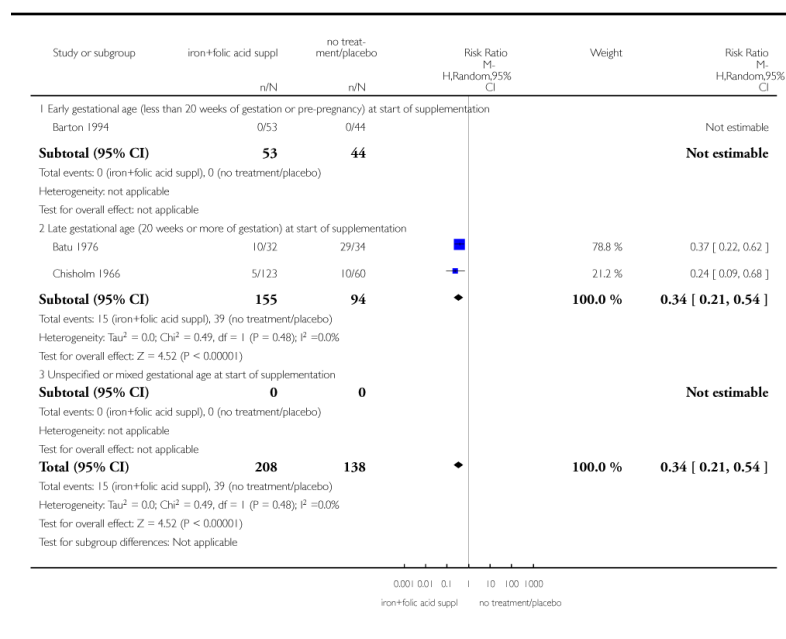

**Analysis 4.16. Comparison 4 Supplementation with iron+folic acid versus no treatment/placebo, Outcome 16 Maternal anaemia at term (Hb less than 110 g/L at 37 weeks' gestation or more): SUBGROUP ANALYSIS by anaemia status at the start of supplementation.**

Review: Daily oral iron supplementation during pregnancy

Comparison: 4 Supplementation with iron+folic acid versus no treatment/placebo

Outcome: 16 Maternal anaemia at term (Hb less than 110 g/L at 37 weeks' gestation or more): SUBGROUP ANALYSIS by anaemia status at the start of supplementation

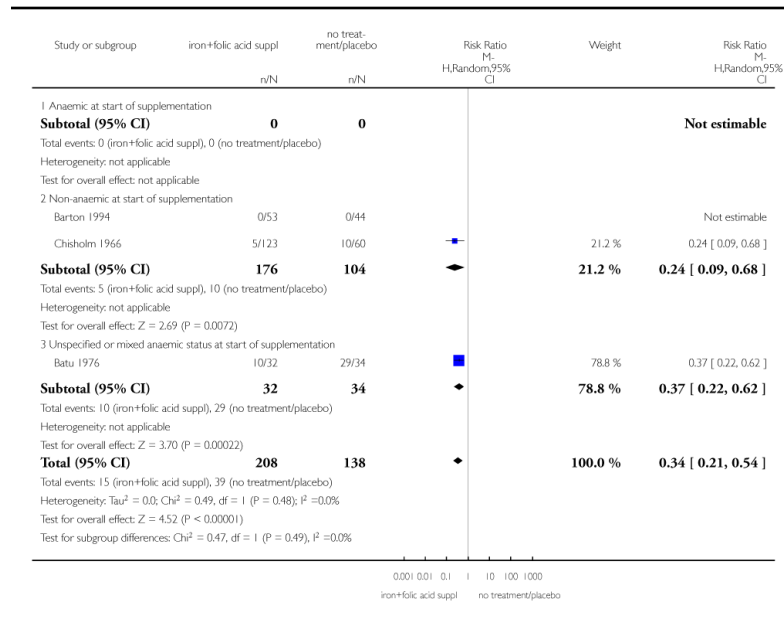

**Analysis 4.17. Comparison 4 Supplementation with iron+folic acid versus no treatment/placebo, Outcome 17 Maternal anaemia at term (Hb less than 110 g/L at 37 weeks' gestation or more): SUBGROUP ANALYSIS by dose of iron.**

Review: Daily oral iron supplementation during pregnancy

Comparison: 4 Supplementation with iron+folic acid versus no treatment/placebo

Outcome: 17 Maternal anaemia at term (Hb less than 110 g/L at 37 weeks' gestation or more): SUBGROUP ANALYSIS by dose of iron

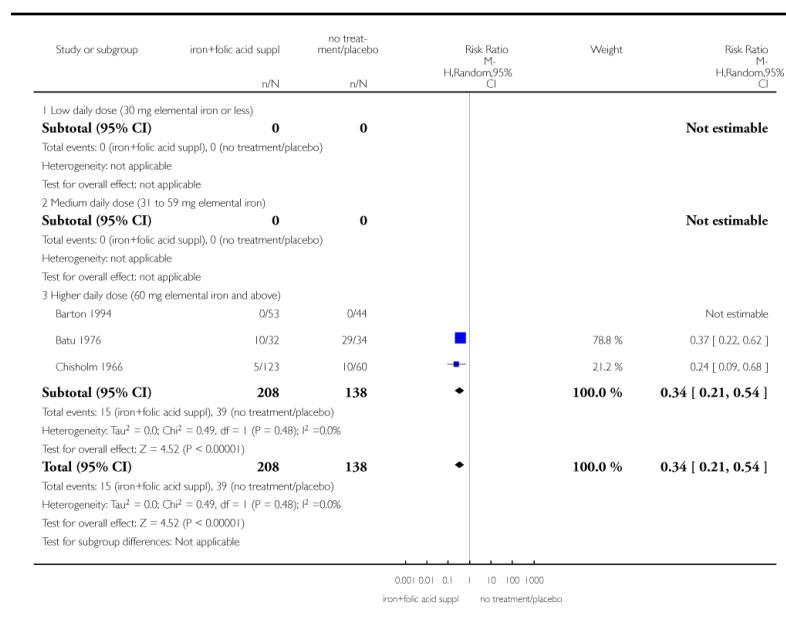

**Analysis 4.18. Comparison 4 Supplementation with iron+folic acid versus no treatment/placebo, Outcome 18 Maternal anaemia at term (Hb less than 110 g/L at 37 weeks' gestation or more): SUBGROUP ANALYSIS by malarial status of setting.**

Review: Daily oral iron supplementation during pregnancy

Comparison: 4 Supplementation with iron+folic acid versus no treatment/placebo

Outcome: 18 Maternal anaemia at term (Hb less than 110 g/L at 37 weeks' gestation or more): SUBGROUP ANALYSIS by malarial status of setting

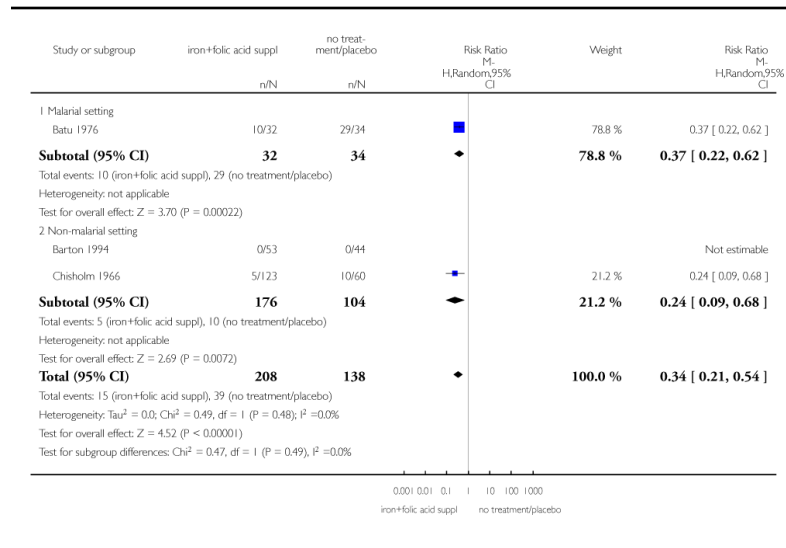

#### Analysis 4.19. Comparison 4 Supplementation with iron+folic acid versus no treatment/placebo, Outcome 19 Maternal iron deficiency at term (as defined by trialists, based on any indicator of iron status at 37 weeks' gestation or more) (ALL)

Review: Daily oral iron supplementation during pregnancy

Comparison: 4 Supplementation with iron+folic acid versus no treatment/placebo

Outcome: 19 Maternal iron deficiency at term (as defined by trialists, based on any indicator of iron status at 37 weeks' gestation or more) (ALL)

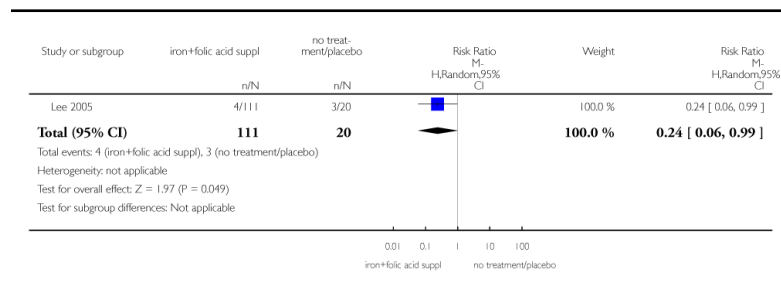

#### Analysis 4.20. Comparison 4 Supplementation with iron+folic acid versus no treatment/placebo, Outcome 20 Maternal iron-deficiency anaemia at

## term (Hb less than 110 g/L and at least one additional laboratory indicators at 37 weeks' gestation or more) (ALL)

Review: Daily oral iron supplementation during pregnancy

Comparison: 4 Supplementation with iron+folic acid versus no treatment/placebo

Outcome: 20 Maternal iron-deficiency anaemia at term (Hb less than 110 g/L and at least one additional laboratory indicators at 37 weeks' gestation or more) (ALL)

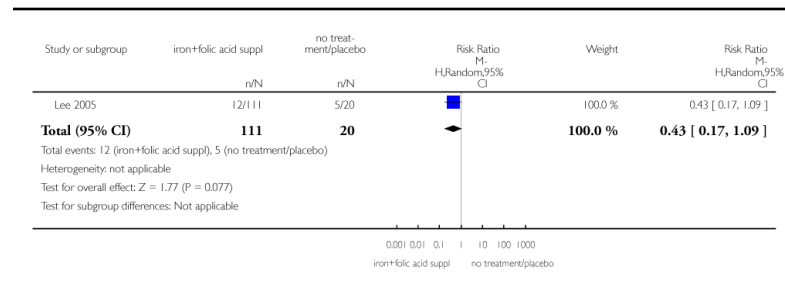

## Analysis 4.21. Comparison 4 Supplementation with iron+folic acid versus no treatment/placebo, Outcome 21 Maternal death (death while pregnant or within 42 days of termination of pregnancy) (ALL)

Review: Daily oral iron supplementation during pregnancy

Comparison: 4 Supplementation with iron+folic acid versus no treatment/placebo

Outcome: 21 Maternal death (death while pregnant or within 42 days of termination of pregnancy) (ALL)

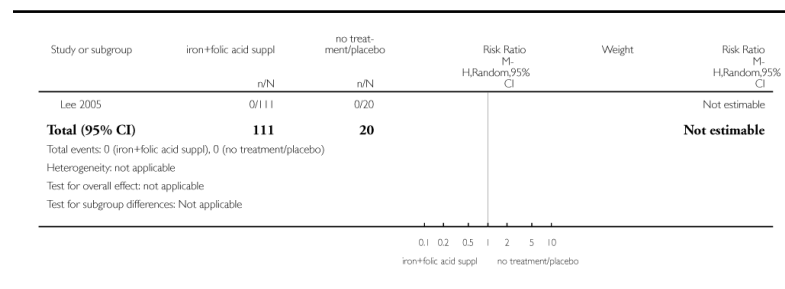

## Analysis 4.22. Comparison 4 Supplementation with iron+folic acid versus no treatment/placebo, Outcome 22 Side effects (any reported throughout the intervention period) (ALL)

Review: Daily oral iron supplementation during pregnancy

Comparison: 4 Supplementation with iron+folic acid versus no treatment/placebo

Outcome: 22 Side effects (any reported throughout the intervention period) (ALL)

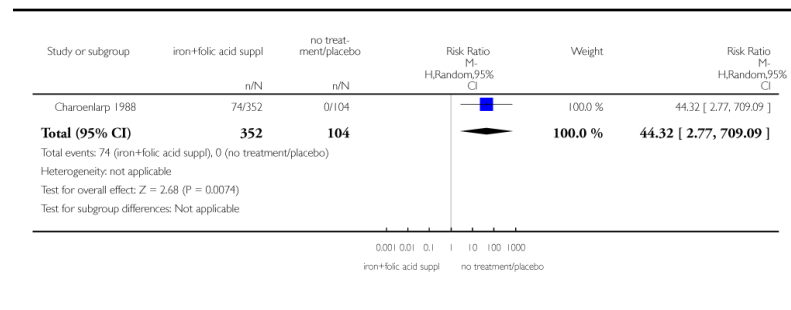

## Analysis 4.23. Comparison 4 Supplementation with iron+folic acid versus no treatment/placebo, Outcome 23 Maternal severe anaemia at any time during second and third trimester (Hb less than 70 g/L) (ALL)

Review: Daily oral iron supplementation during pregnancy

Comparison: 4 Supplementation with iron+folic acid versus no treatment/placebo

Outcome: 23 Maternal severe anaemia at any time during second and third trimester (Hb less than 70 g/L) (ALL)

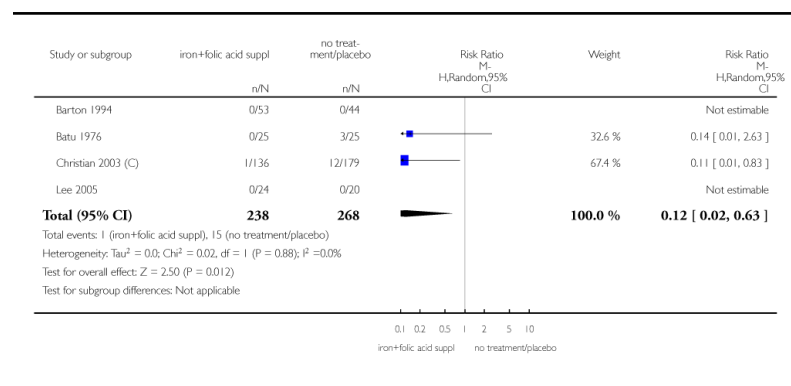

## Analysis 4.25. Comparison 4 Supplementation with iron+folic acid versus no treatment/placebo, Outcome 25 Infection during pregnancy (including urinary tract infections) (ALL)

Review: Daily oral iron supplementation during pregnancy

Comparison: 4 Supplementation with iron+folic acid versus no treatment/placebo

Outcome: 25 Infection during pregnancy (including urinary tract infections) (ALL)

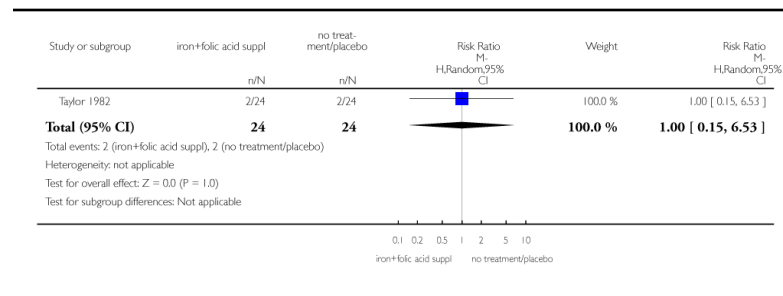

## Analysis 4.26. Comparison 4 Supplementation with iron+folic acid versus no treatment/placebo, Outcome 26 Very low birthweight (less than 1500 g) (ALL)

Review: Daily oral iron supplementation during pregnancy

Comparison: 4 Supplementation with iron+folic acid versus no treatment/placebo

Outcome: 26 Very low birthweight (less than 1500 g) (ALL)

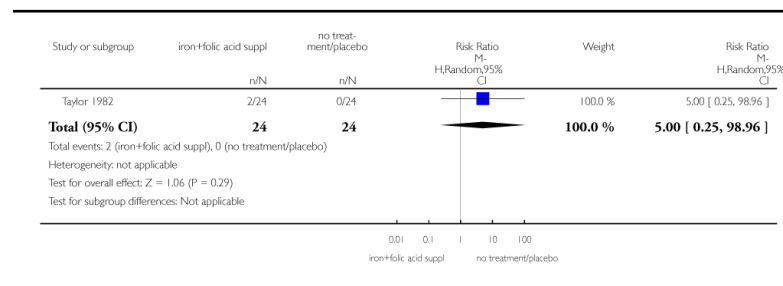



### Analysis 4.27. Comparison 4 Supplementation with iron+folic acid versus no treatment/placebo, Outcome 27 Very premature birth (less than 34 weeks' gestation) (ALL)

Review: Daily oral iron supplementation during pregnancy

Comparison: 4 Supplementation with iron+folic acid versus no treatment/placebo

Outcome: 27 Very premature birth (less than 34 weeks' gestation) (ALL)

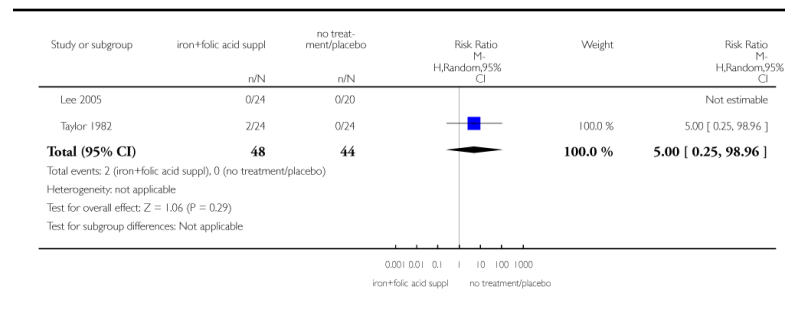

### Analysis 4.30. Comparison 4 Supplementation with iron+folic acid versus no treatment/placebo, Outcome 30 Admission to special care unit (ALL)

Review: Daily oral iron supplementation during pregnancy

Comparison: 4 Supplementation with iron+folic acid versus no treatment/placebo

Outcome: 30 Admission to special care unit (ALL)

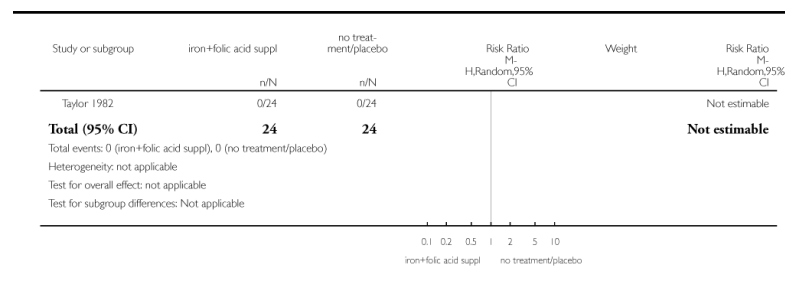

### Analysis 4.31. Comparison 4 Supplementation with iron+folic acid versus no treatment/placebo, Outcome 31 Maternal anaemia at or near term (Hb less than 110 g/L at 34 weeks' gestation or more) (ALL)

Review: Daily oral iron supplementation during pregnancy

Comparison: 4 Supplementation with iron+folic acid versus no treatment/placebo

Outcome: 31 Maternal anaemia at or near term (Hb less than 110 g/L at 34 weeks' gestation or more) (ALL)

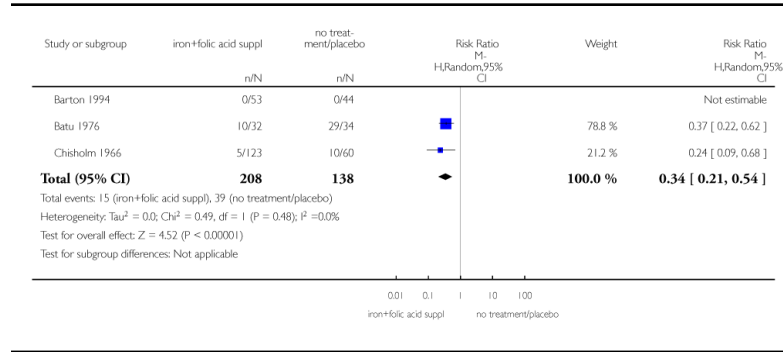

### Analysis 4.32. Comparison 4 Supplementation with iron+folic acid versus no treatment/placebo, Outcome 32 Maternal iron deficiency at or near term (as defined by trialists, based on any indicator of iron status at 34 weeks' gestation or more) (ALL)

Review: Daily oral iron supplementation during pregnancy

Comparison: 4 Supplementation with iron+folic acid versus no treatment/placebo

Outcome: 32 Maternal iron deficiency at or near term (as defined by trialists, based on any indicator of iron status at 34 weeks' gestation or more) (ALL)

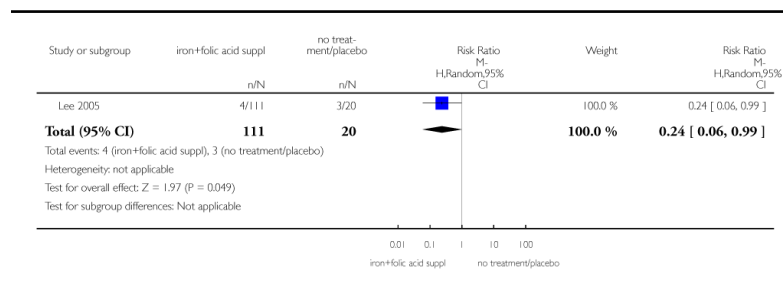

### Analysis 4.33. Comparison 4 Supplementation with iron+folic acid versus no treatment/placebo, Outcome 33 Maternal iron-deficiency anaemia at or

## near term (Hb less than 110 g/L and at least one additional laboratory indicators at 34 weeks' gestation or more) (ALL)

Review: Daily oral iron supplementation during pregnancy

Comparison: 4 Supplementation with iron+folic acid versus no treatment/placebo

Outcome: 33 Maternal iron-deficiency anaemia at or near term (Hb less than 110 g/L and at least one additional laboratory indicators at 34 weeks' gestation or more) (ALL)

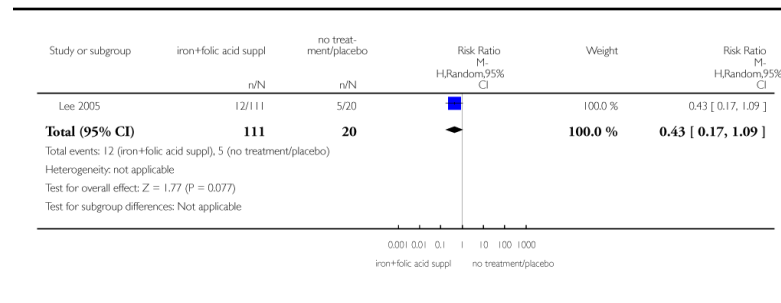

## Analysis 4.34. Comparison 4 Supplementation with iron+folic acid versus no treatment/placebo, Outcome 34 Maternal Hb concentration at term or near term (in g/L, at 34 weeks' gestation or more) (ALL)

Review: Daily oral iron supplementation during pregnancy

Comparison: 4 Supplementation with iron+folic acid versus no treatment/placebo

Outcome: 34 Maternal Hb concentration at term or near term (in g/L, at 34 weeks' gestation or more) (ALL)

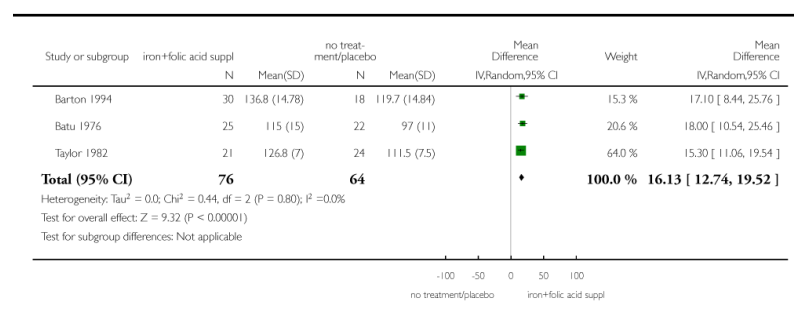

### Analysis 4.35. Comparison 4 Supplementation with iron+folic acid versus no treatment/placebo, Outcome 35 Maternal Hb concentration within 6 wk postpartum (g/L) (ALL)

Review: Daily oral iron supplementation during pregnancy

Comparison: 4 Supplementation with iron+folic acid versus no treatment/placebo

Outcome: 35 Maternal Hb concentration within 6 wk postpartum (g/L) (ALL)

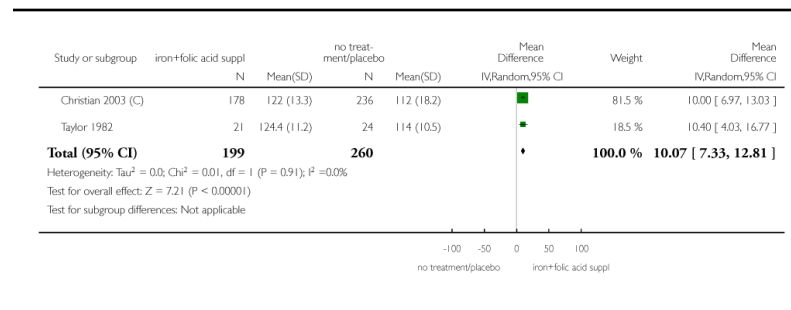

### Analysis 4.36. Comparison 4 Supplementation with iron+folic acid versus no treatment/placebo, Outcome 36 Maternal high haemoglobin concentrations during second or third trimester (Hb more than 130 g/L) (ALL)

Review: Daily oral iron supplementation during pregnancy

Comparison: 4 Supplementation with iron+folic acid versus no treatment/placebo

Outcome: 36 Maternal high haemoglobin concentrations during second or third trimester (Hb more than 130 g/L) (ALL)

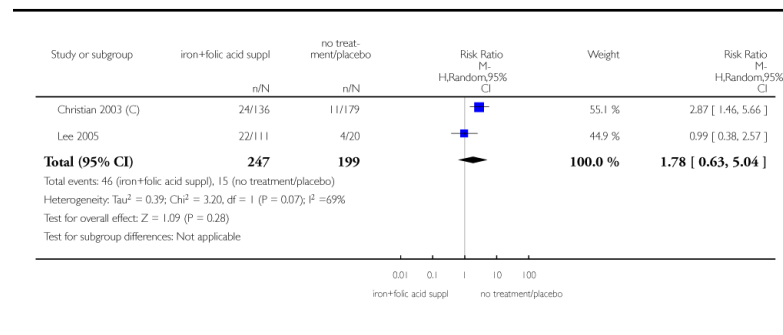

### Analysis 4.37. Comparison 4 Supplementation with iron+folic acid versus no treatment/placebo, Outcome 37 Maternal high haemoglobin concentrations at or near term (Hb more than 130 g/L at 34 weeks' gestation or more) (ALL)

Review: Daily oral iron supplementation during pregnancy

Comparison: 4 Supplementation with iron+folic acid versus no treatment/placebo

Outcome: 37 Maternal high haemoglobin concentrations at or near term (Hb more than 130 g/L at 34 weeks' gestation or more) (ALL)

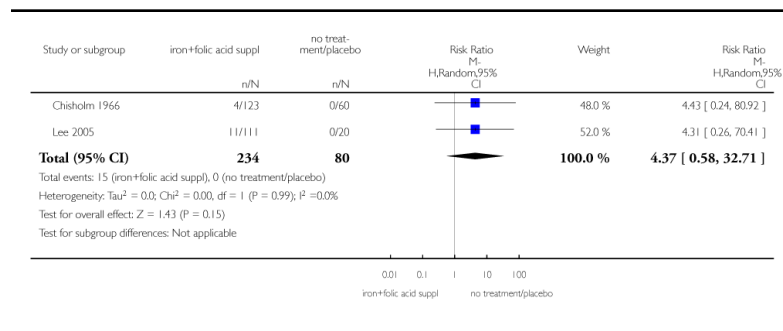

### Analysis 4.38. Comparison 4 Supplementation with iron+folic acid versus no treatment/placebo, Outcome 38 Moderate anaemia at postpartum (Hb more than 80 g/L and less than 110 g/L) (ALL)

Review: Daily oral iron supplementation during pregnancy

Comparison: 4 Supplementation with iron+folic acid versus no treatment/placebo

Outcome: 38 Moderate anaemia at postpartum (Hb more than 80 g/L and less than 110 g/L) (ALL)

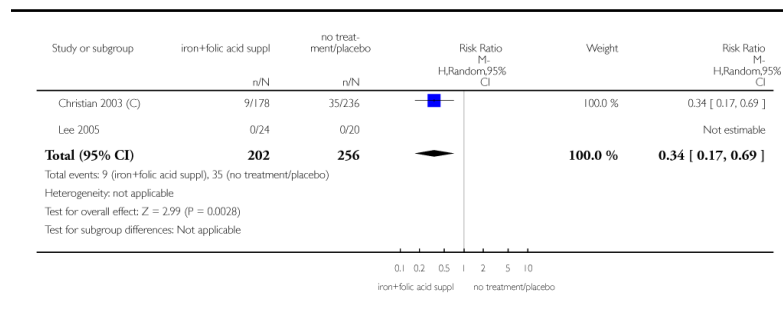

### Analysis 4.39. Comparison 4 Supplementation with iron+folic acid versus no treatment/placebo, Outcome 39 Maternal severe anaemia at term or near (Hb less than 70 g/L at 34 weeks' gestation or more) (ALL)

Review: Daily oral iron supplementation during pregnancy

Comparison: 4 Supplementation with iron+folic acid versus no treatment/placebo

Outcome: 39 Maternal severe anaemia at term or near (Hb less than 70 g/L at 34 weeks' gestation or more) (ALL)

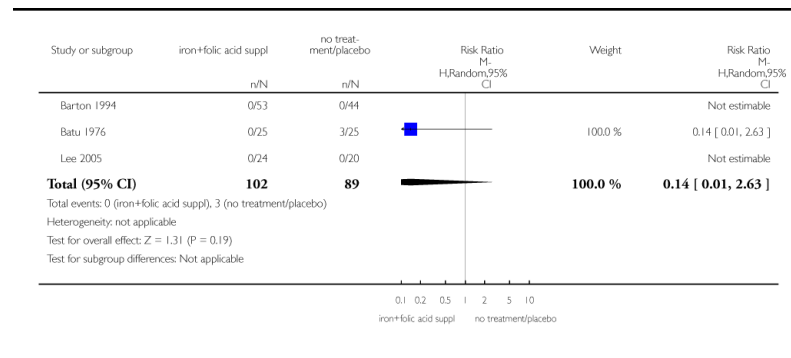

### Analysis 4.40. Comparison 4 Supplementation with iron+folic acid versus no treatment/placebo, Outcome 40 Severe anaemia at postpartum (Hb less than 80 g/L) (ALL)

Review: Daily oral iron supplementation during pregnancy

Comparison: 4 Supplementation with iron+folic acid versus no treatment/placebo

Outcome: 40 Severe anaemia at postpartum (Hb less than 80 g/L) (ALL)

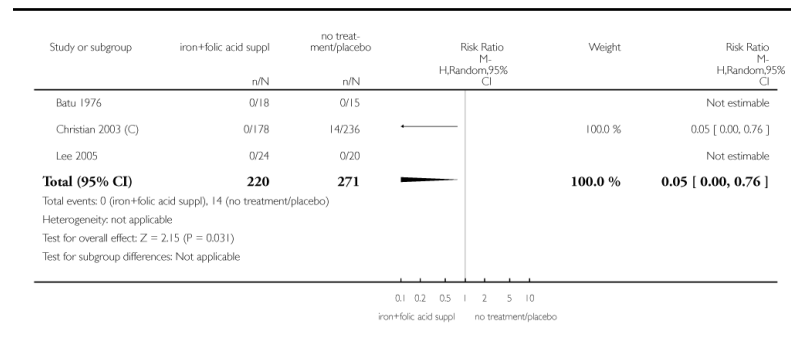

### Analysis 4.41. Comparison 4 Supplementation with iron+folic acid versus no treatment/placebo, Outcome 41 Puerperal infection (ALL)

Review: Daily oral iron supplementation during pregnancy

Comparison: 4 Supplementation with iron+folic acid versus no treatment/placebo

Outcome: 41 Puerperal infection (ALL)

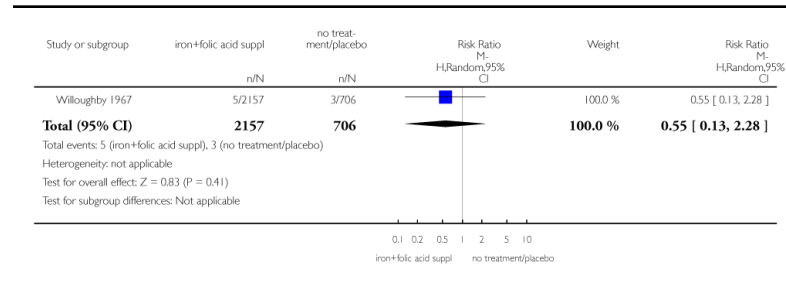

### Analysis 4.42. Comparison 4 Supplementation with iron+folic acid versus no treatment/placebo, Outcome 42 Antepartum haemorrhage (ALL)

Review: Daily oral iron supplementation during pregnancy

Comparison: 4 Supplementation with iron+folic acid versus no treatment/placebo

Outcome: 42 Antepartum haemorrhage (ALL)

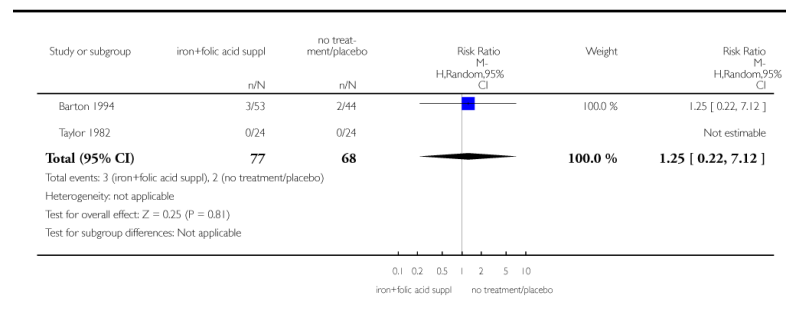

### Analysis 4.44. Comparison 4 Supplementation with iron+folic acid versus no treatment/placebo, Outcome 44 Placental abruption (ALL)

Review: Daily oral iron supplementation during pregnancy

Comparison: 4 Supplementation with iron+folic acid versus no treatment/placebo

## Outcome: 44 Placental abruption (ALL)

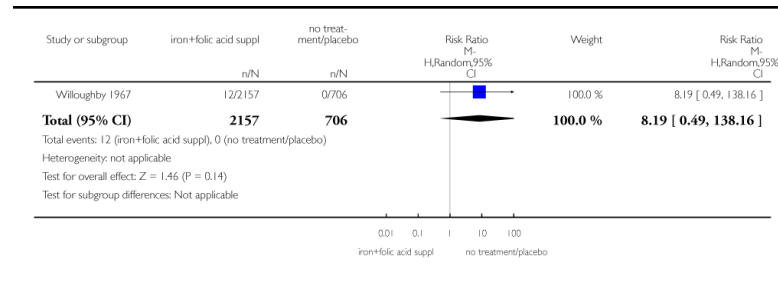

### Analysis 4.45. Comparison 4 Supplementation with iron+folic acid versus no treatment/placebo, Outcome 45 Pre-eclampsia (ALL)

Review: Daily oral iron supplementation during pregnancy

Comparison: 4 Supplementation with iron+folic acid versus no treatment/placebo

Outcome: 45 Pre-eclampsia (ALL)

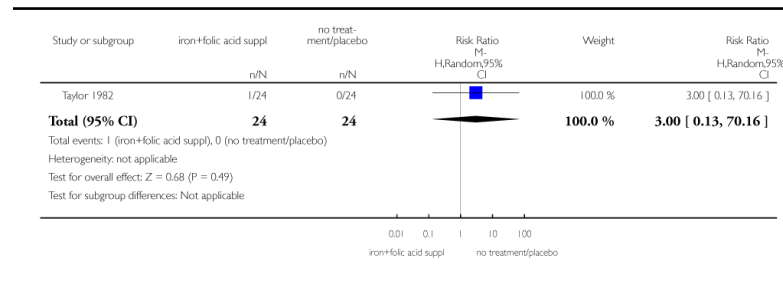

### Analysis 5.1. Comparison 5 Supplementation with iron+folic acid versus folic acid alone (without iron) supplementation, Outcome 1 Low birthweight (less than 2500 g) (ALL)

Review: Daily oral iron supplementation during pregnancy

Comparison: 5 Supplementation with iron+folic acid versus folic acid alone (without iron) supplementation

Outcome: 1 Low birthweight (less than 2500 g) (ALL)



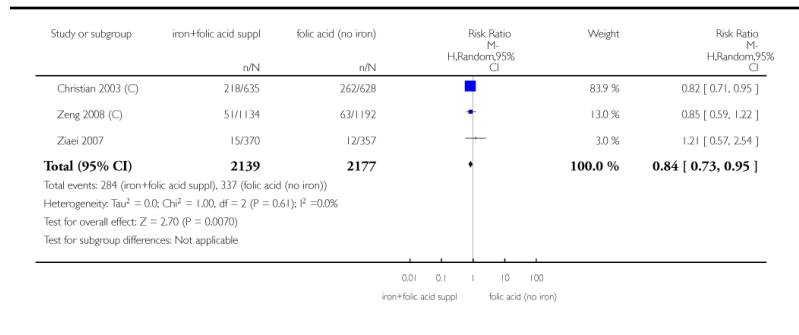

### Analysis 5.2. Comparison 5 Supplementation with iron+folic acid versus folic acid alone (without iron) supplementation, Outcome 2 Low birthweight (less than 2500 g): SUBGROUP ANALYSIS by gestational age at the start of supplementation.

Review: Daily oral iron supplementation during pregnancy

Comparison: 5 Supplementation with iron+folic acid versus folic acid alone (without iron) supplementation

Outcome: 2 Low birthweight (less than 2500 g): SUBGROUP ANALYSIS by gestational age at the start of supplementation

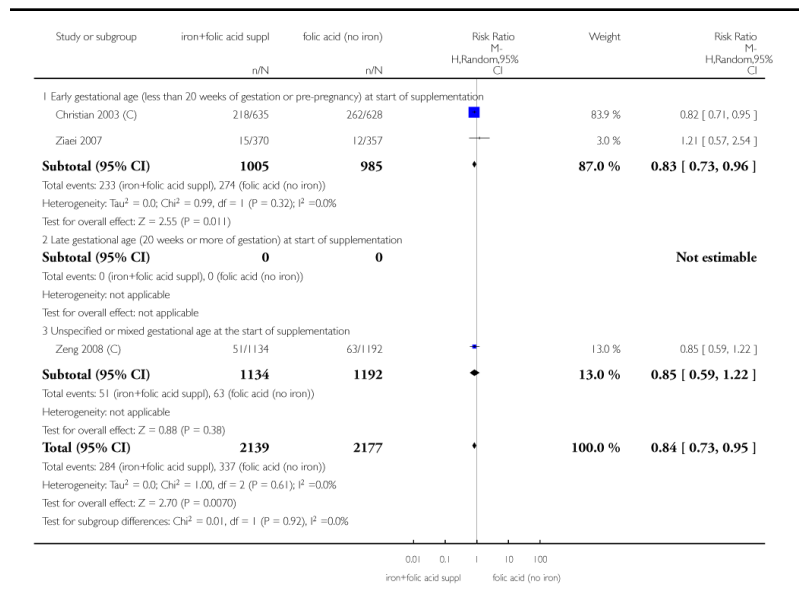

### Analysis 5.3. Comparison 5 Supplementation with iron+folic acid versus folic acid alone (without iron) supplementation, Outcome 3 Low birthweight (less than 2500 g): SUBGROUP ANALYSIS by anaemia status at the start of supplementation.

Review: Daily oral iron supplementation during pregnancy

Comparison: 5 Supplementation with iron+folic acid versus folic acid alone (without iron) supplementation

Outcome: 3 Low birthweight (less than 2500 g): SUBGROUP ANALYSIS by anaemia status at the start of supplementation

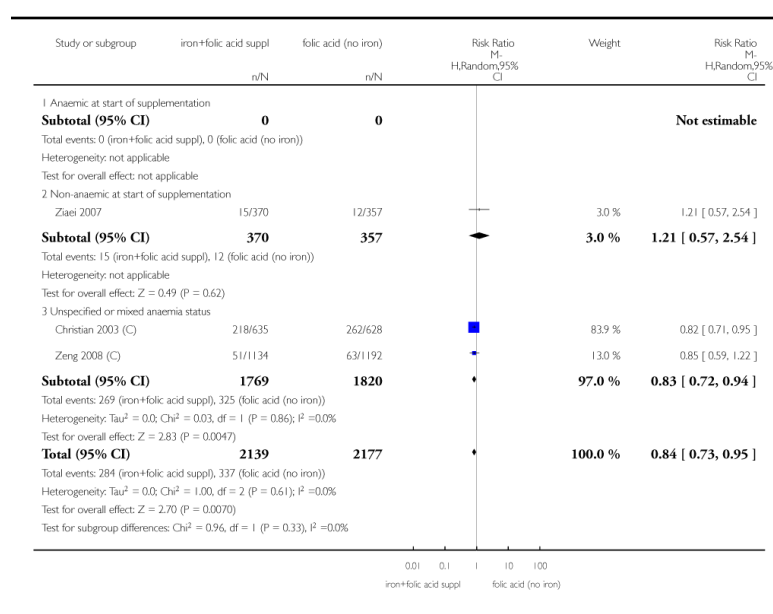

### Analysis 5.4. Comparison 5 Supplementation with iron+folic acid versus folic acid alone (without iron) supplementation, Outcome 4 Low birthweight (less than 2500 g): SUBGROUP ANALYSIS by dose of iron.

Review: Daily oral iron supplementation during pregnancy

Comparison: 5 Supplementation with iron+folic acid versus folic acid alone (without iron) supplementation

Outcome: 4 Low birthweight (less than 2500 g): SUBGROUP ANALYSIS by dose of iron

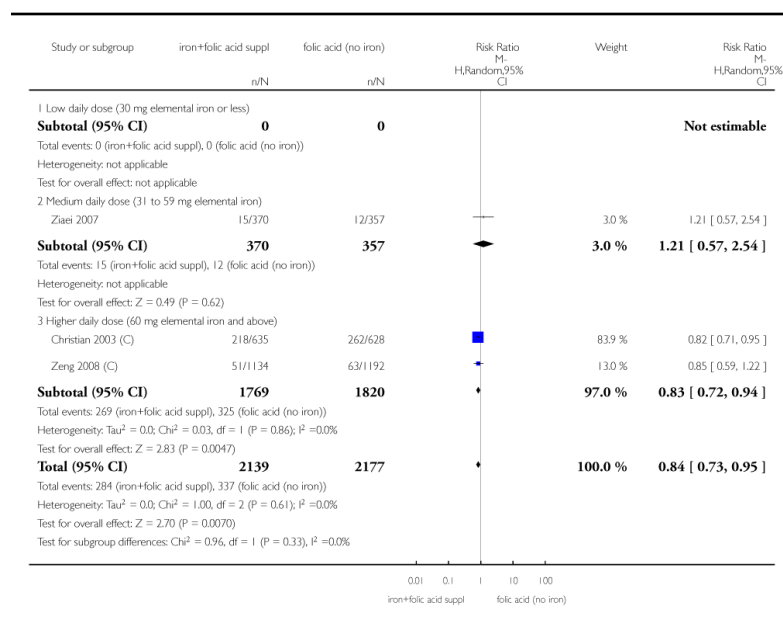

### Analysis 5.5. Comparison 5 Supplementation with iron+folic acid versus folic acid alone (without iron) supplementation, Outcome 5 Low birthweight (less than 2500 g): SUBGROUP ANALYSIS by malarial status of setting.

Review: Daily oral iron supplementation during pregnancy

Comparison: 5 Supplementation with iron+folic acid versus folic acid alone (without iron) supplementation

Outcome: 5 Low birthweight (less than 2500 g): SUBGROUP ANALYSIS by malarial status of setting

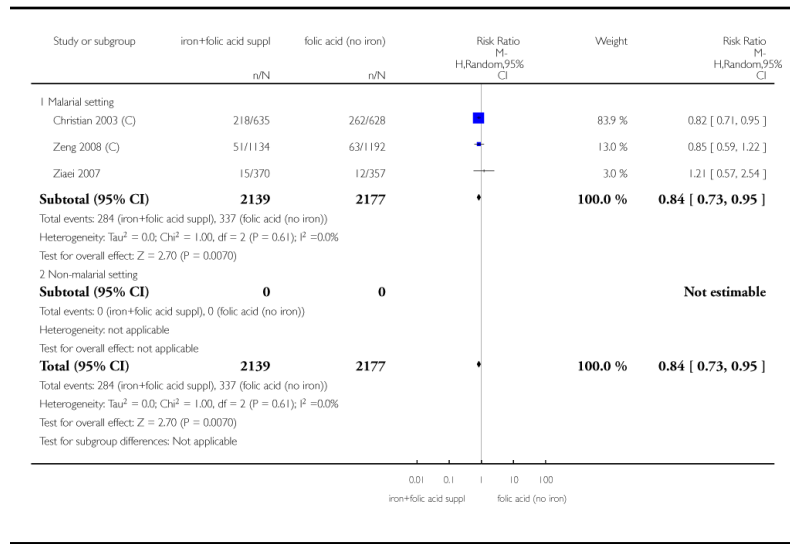

### Analysis 5.6. Comparison 5 Supplementation with iron+folic acid versus folic acid alone (without iron) supplementation, Outcome 6 Birthweight (g) (ALL)

Review: Daily oral iron supplementation during pregnancy

Comparison: 5 Supplementation with iron+folic acid versus folic acid alone (without iron) supplementation

Outcome: 6 Birthweight (g) (ALL)

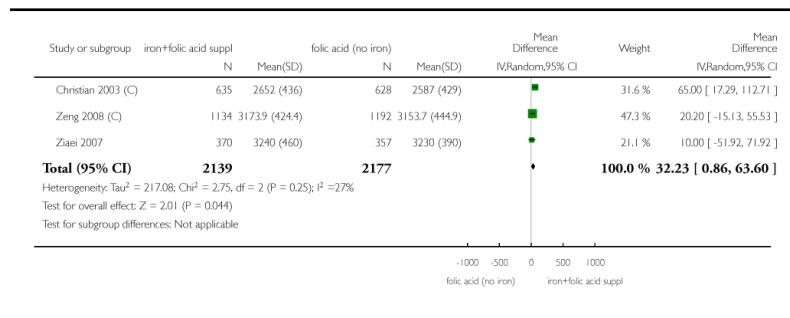

### Analysis 5.7. Comparison 5 Supplementation with iron+folic acid versus folic acid alone (without iron) supplementation, Outcome 7 Birthweight (g): SUBGROUP ANALYSIS by gestational age at the start of supplementation.

Review: Daily oral iron supplementation during pregnancy

Comparison: 5 Supplementation with iron+folic acid versus folic acid alone (without iron) supplementation

Outcome: 7 Birthweight (g): SUBGROUP ANALYSIS by gestational age at the start of supplementation

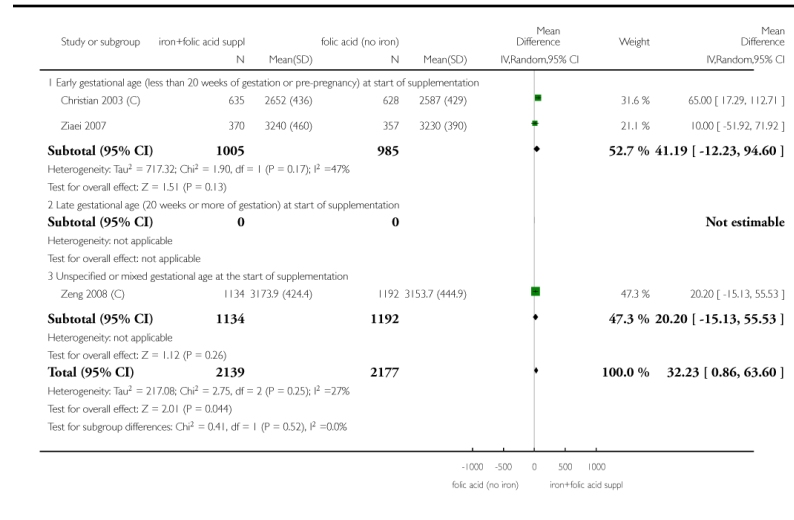

### Analysis 5.8. Comparison 5 Supplementation with iron+folic acid versus folic acid alone (without iron) supplementation, Outcome 8 Birthweight (g): SUBGROUP ANALYSIS by anaemia status at the start of supplementation.

Review: Daily oral iron supplementation during pregnancy

Comparison: 5 Supplementation with iron+folic acid versus folic acid alone (without iron) supplementation

Outcome: 8 Birthweight (g): SUBGROUP ANALYSIS by anaemia status at the start of supplementation

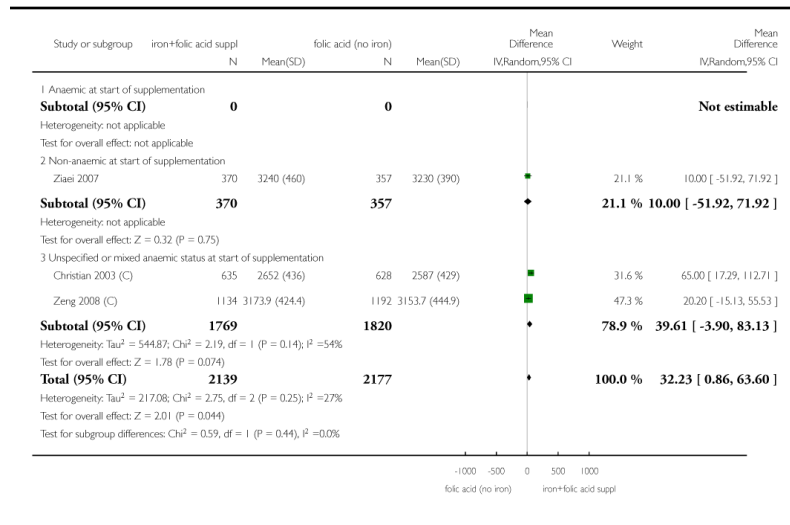

### Analysis 5.9. Comparison 5 Supplementation with iron+folic acid versus folic acid alone (without iron) supplementation, Outcome 9 Birthweight (g): SUBGROUP ANALYSIS by dose of iron.

Review: Daily oral iron supplementation during pregnancy

Comparison: 5 Supplementation with iron+folic acid versus folic acid alone (without iron) supplementation

Outcome: 9 Birthweight (g): SUBGROUP ANALYSIS by dose of iron

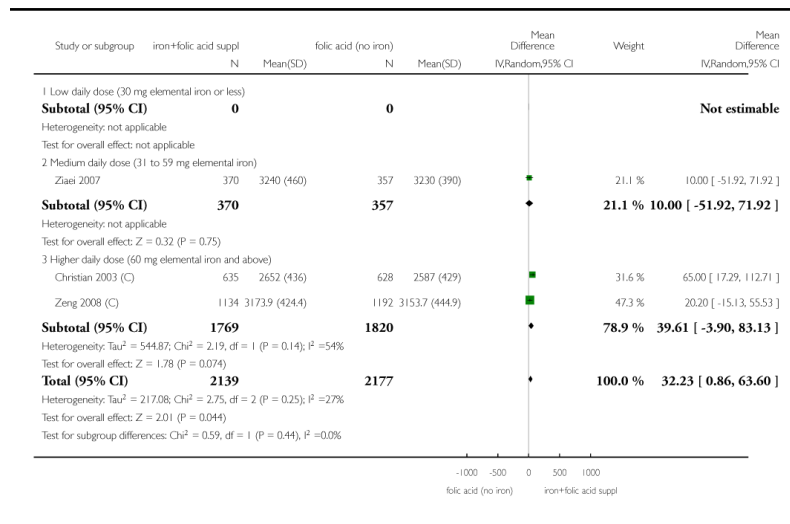

## Analysis 5.10. Comparison 5 Supplementation with iron+folic acid versus folic acid alone (without iron) supplementation, Outcome 10 Birthweight (g): SUBGROUP ANALYSIS by malarial status of setting.

Review: Daily oral iron supplementation during pregnancy

Comparison: 5 Supplementation with iron+folic acid versus folic acid alone (without iron) supplementation

Outcome: 10 Birthweight (g): SUBGROUP ANALYSIS by malarial status of setting

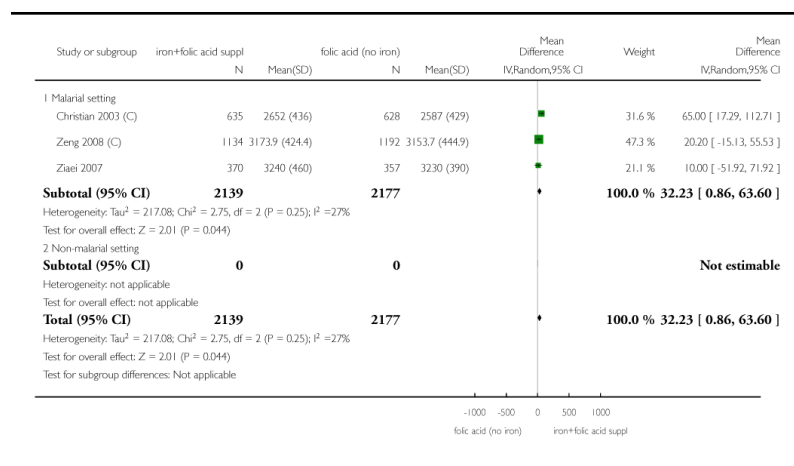

## Analysis 5.11. Comparison 5 Supplementation with iron+folic acid versus folic acid alone (without iron) supplementation, Outcome 11 Premature birth (less than 37 weeks of gestation) (ALL)

Review: Daily oral iron supplementation during pregnancy

Comparison: 5 Supplementation with iron+folic acid versus folic acid alone (without iron) supplementation

Outcome: 11 Premature birth (less than 37 weeks of gestation) (ALL)

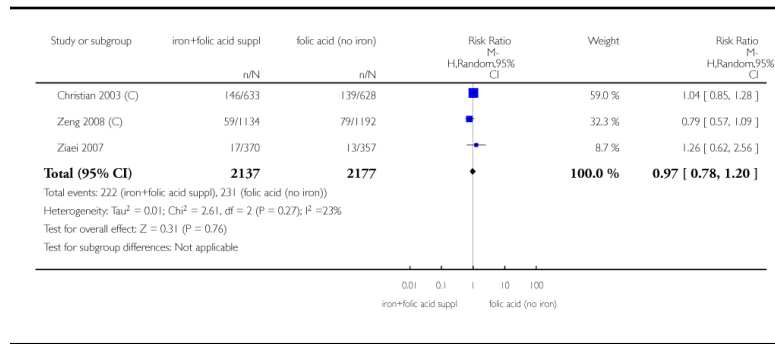

### Analysis 5.12. Comparison 5 Supplementation with iron+folic acid versus folic acid alone (without iron) supplementation, Outcome 12 Premature birth (less 37 weeks of gestation): SUBGROUP ANALYSIS by gestational age at the start of supplementation.

Review: Daily oral iron supplementation during pregnancy

Comparison: 5 Supplementation with iron+folic acid versus folic acid alone (without iron) supplementation

Outcome: 12 Premature birth (less 37 weeks of gestation): SUBGROUP ANALYSIS by gestational age at the start of supplementation

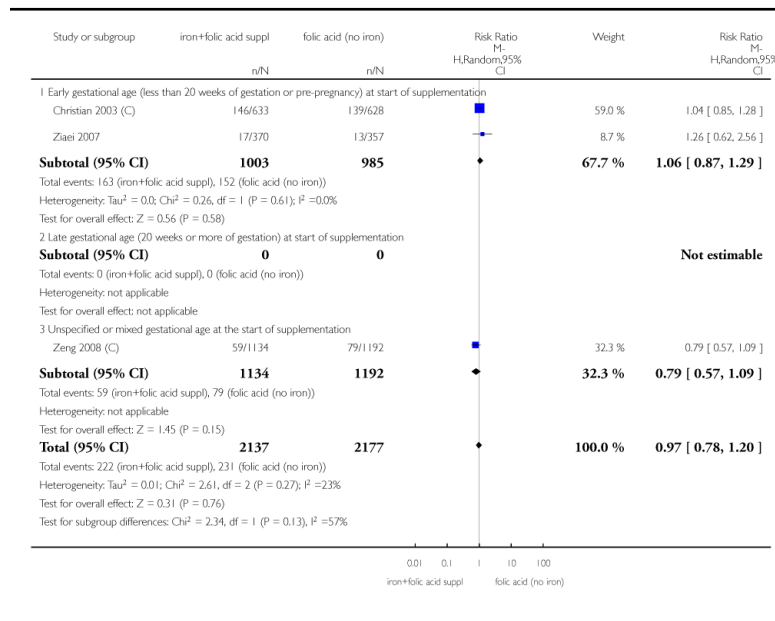



### Analysis 5.13. Comparison 5 Supplementation with iron+folic acid versus folic acid alone (without iron) supplementation, Outcome 13 Premature birth (less 37 weeks of gestation): SUBGROUP ANALYSIS by anaemia status at the start of supplementation.

Review: Daily oral iron supplementation during pregnancy

Comparison: 5 Supplementation with iron+folic acid versus folic acid alone (without iron) supplementation

Outcome: 13 Premature birth (less 37 weeks of gestation): SUBGROUP ANALYSIS by anaemia status at the start of supplementation

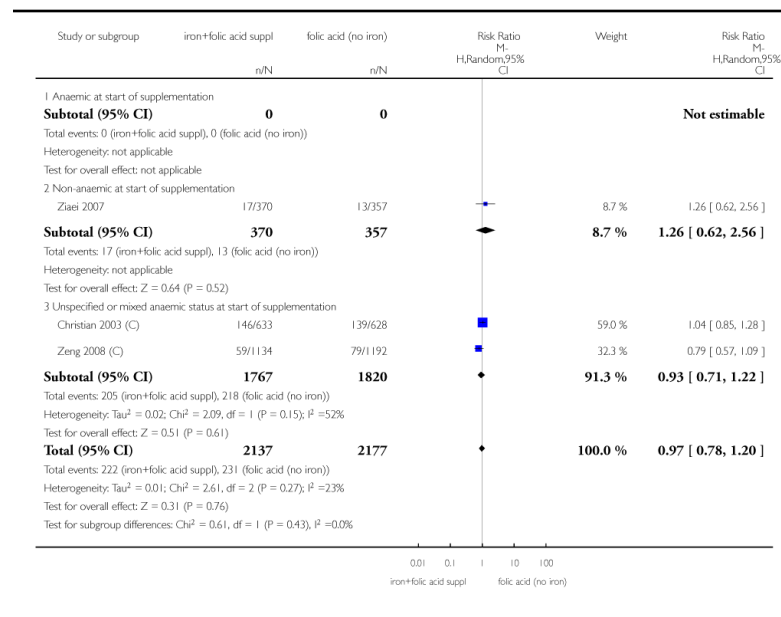

### Analysis 5.14. Comparison 5 Supplementation with iron+folic acid versus folic acid alone (without iron) supplementation, Outcome 14 Premature birth (less 37 weeks of gestation): SUBGROUP ANALYSIS by dose of iron.

Review: Daily oral iron supplementation during pregnancy

Comparison: 5 Supplementation with iron+folic acid versus folic acid alone (without iron) supplementation

Outcome: 14 Premature birth (less 37 weeks of gestation): SUBGROUP ANALYSIS by dose of iron

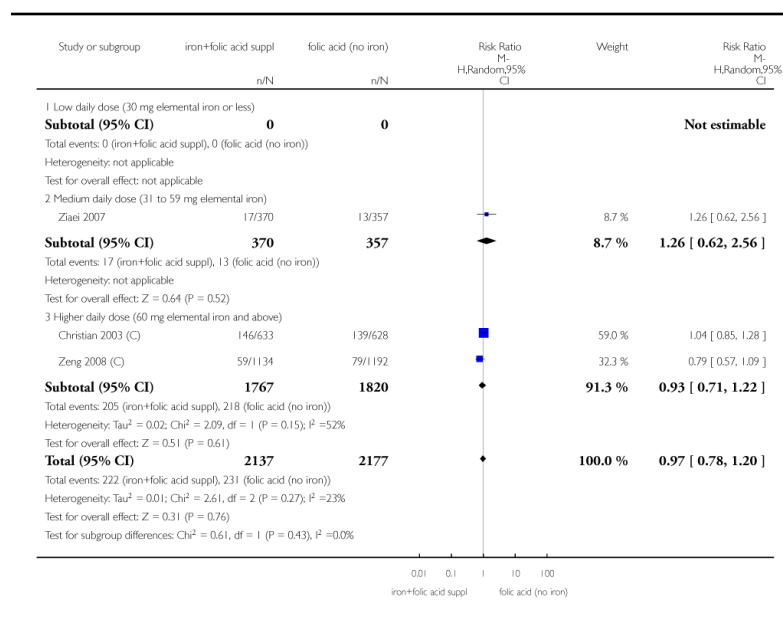

**Analysis 5.15. Comparison 5 Supplementation with iron+folic acid versus folic acid alone (without iron) supplementation, Outcome 15 Premature birth (less 37 weeks of gestation): SUBGROUP ANALYSIS by malarial status of setting.**

Review: Daily oral iron supplementation during pregnancy

Comparison: 5 Supplementation with iron+folic acid versus folic acid alone (without iron) supplementation

Outcome: 15 Premature birth (less 37 weeks of gestation): SUBGROUP ANALYSIS by malarial status of setting

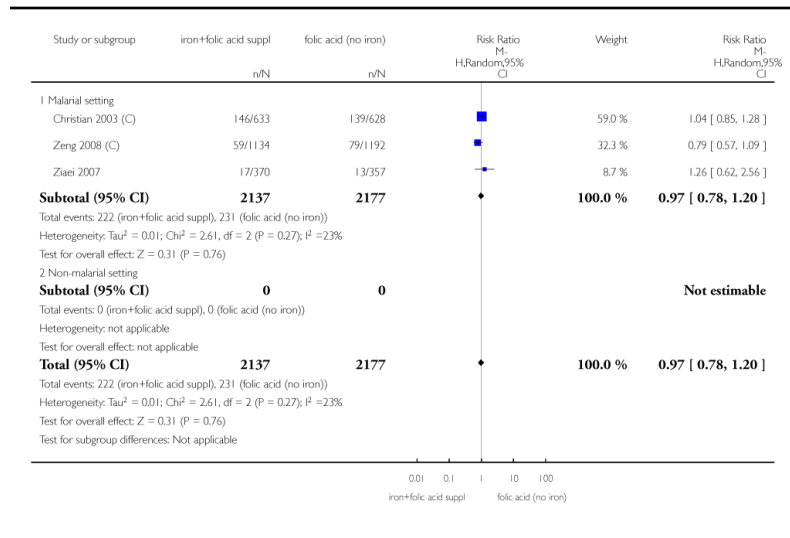

### Analysis 5.16. Comparison 5 Supplementation with iron+folic acid versus folic acid alone (without iron) supplementation, Outcome 16 Neonatal death (within 28 days after delivery) (ALL)

Review: Daily oral iron supplementation during pregnancy

Comparison: 5 Supplementation with iron+folic acid versus folic acid alone (without iron) supplementation

Outcome: 16 Neonatal death (within 28 days after delivery) (ALL)

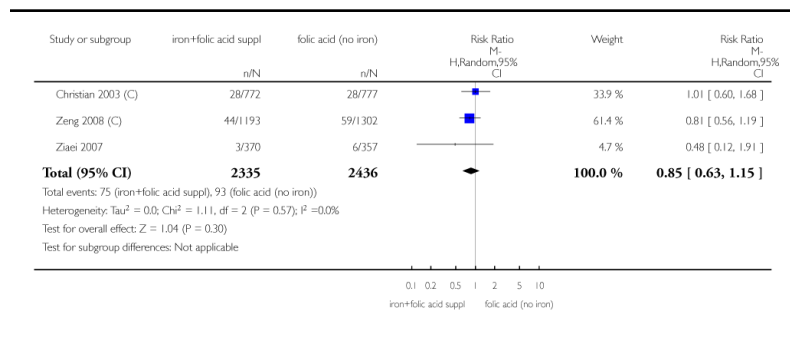

### Analysis 5.17. Comparison 5 Supplementation with iron+folic acid versus folic acid alone (without iron) supplementation, Outcome 17 Neonatal death

**(within 28 days after delivery): SUBGROUP ANALYSIS by gestational age at the start of supplementation.**

Review: Daily oral iron supplementation during pregnancy

Comparison: 5 Supplementation with iron+folic acid versus folic acid alone (without iron) supplementation

Outcome: 17 Neonatal death (within 28 days after delivery): SUBGROUP ANALYSIS by gestational age at the start of supplementation

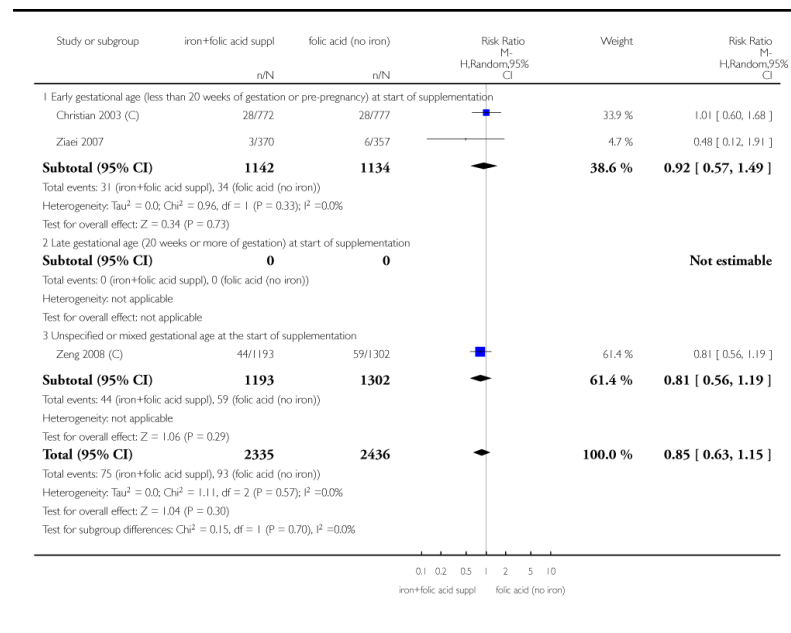

**Analysis 5.18. Comparison 5 Supplementation with iron+folic acid versus folic acid alone (without iron) supplementation, Outcome 18 Neonatal death (within 28 days after delivery) : SUBGROUP ANALYSIS by anaemia status at the start of supplementation.**

Review: Daily oral iron supplementation during pregnancy

Comparison: 5 Supplementation with iron+folic acid versus folic acid alone (without iron) supplementation

Outcome: 18 Neonatal death (within 28 days after delivery) : SUBGROUP ANALYSIS by anaemia status at the start of supplementation

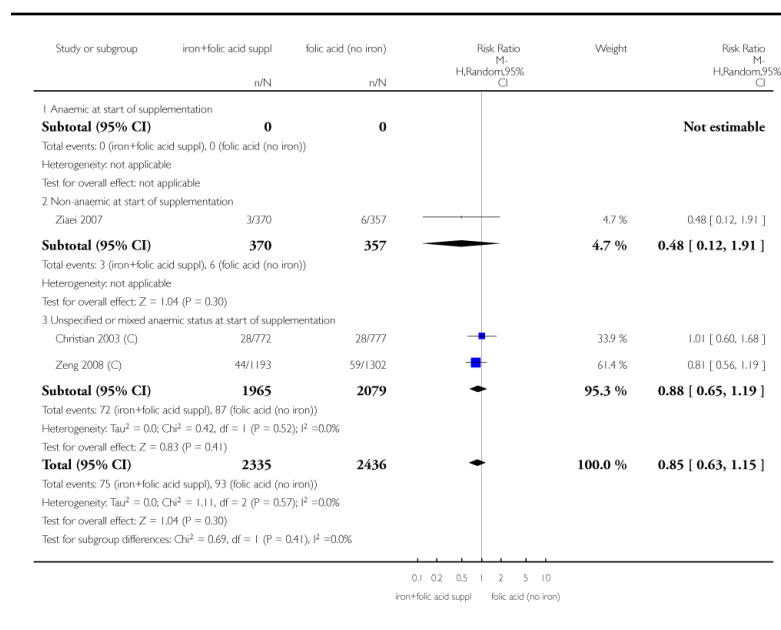

### Analysis 5.19. Comparison 5 Supplementation with iron+folic acid versus folic acid alone (without iron) supplementation, Outcome 19 Neonatal death (within 28 days after delivery): SUBGROUP ANALYSIS by dose of iron.

Review: Daily oral iron supplementation during pregnancy

Comparison: 5 Supplementation with iron+folic acid versus folic acid alone (without iron) supplementation

Outcome: 19 Neonatal death (within 28 days after delivery): SUBGROUP ANALYSIS by dose of iron

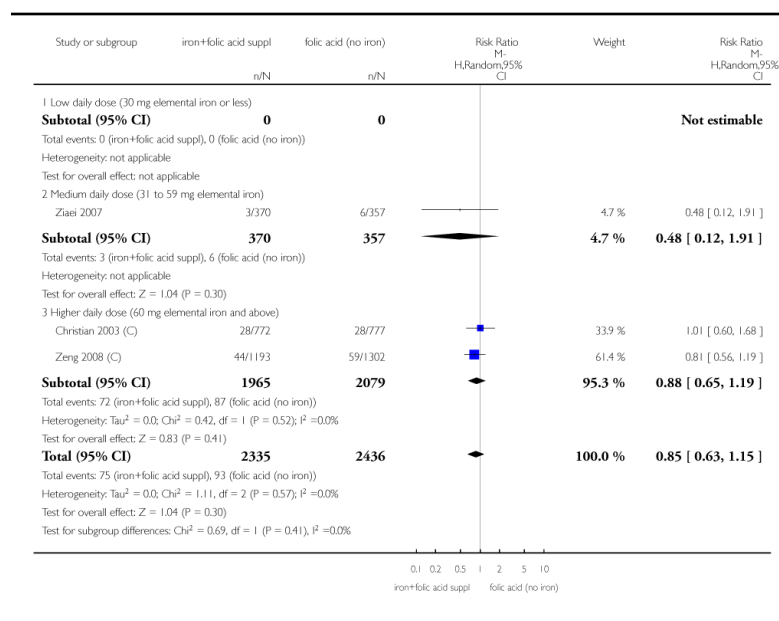

**Analysis 5.20. Comparison 5 Supplementation with iron+folic acid versus folic acid alone (without iron) supplementation, Outcome 20 Neonatal death (within 28 days after delivery): SUBGROUP ANALYSIS by malarial status of setting.**

Review: Daily oral iron supplementation during pregnancy

Comparison: 5 Supplementation with iron+folic acid versus folic acid alone (without iron) supplementation

Outcome: 20 Neonatal death (within 28 days after delivery): SUBGROUP ANALYSIS by malarial status of setting

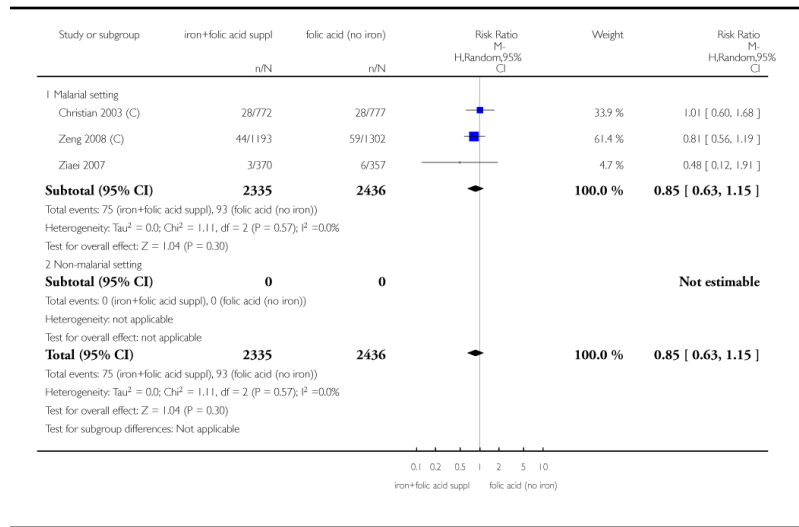

### Analysis 5.21. Comparison 5 Supplementation with iron+folic acid versus folic acid alone (without iron) supplementation, Outcome 21 Congenital anomalies (ALL)

Review: Daily oral iron supplementation during pregnancy

Comparison: 5 Supplementation with iron+folic acid versus folic acid alone (without iron) supplementation

Outcome: 21 Congenital anomalies (ALL)

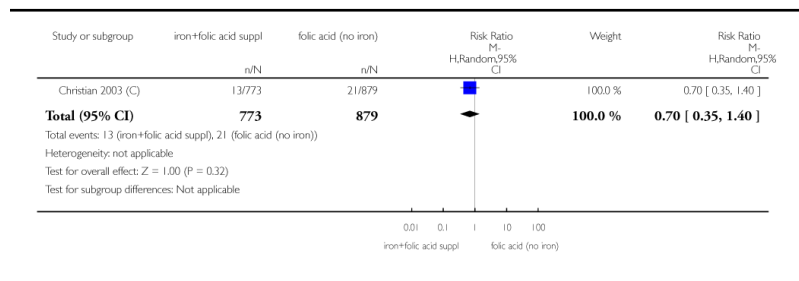

### Analysis 5.22. Comparison 5 Supplementation with iron+folic acid versus folic acid alone (without iron) supplementation, Outcome 22 Maternal anaemia at term (Hb less than 110 g/L at 37 weeks' gestation or more) (ALL)

Review: Daily oral iron supplementation during pregnancy

Comparison: 5 Supplementation with iron+folic acid versus folic acid alone (without iron) supplementation

Outcome: 22 Maternal anaemia at term (Hb less than 110 g/L at 37 weeks' gestation or more) (ALL)

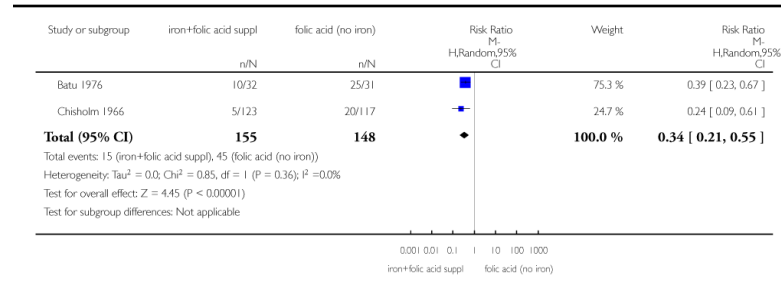

**Analysis 5.23. Comparison 5 Supplementation with iron+folic acid versus folic acid alone (without iron) supplementation, Outcome 23 Maternal anaemia at term (Hb less than 110 g/L at 37 weeks' gestation or more): SUBGROUP ANALYSIS by gestational age at the start of supplementation.**

Review: Daily oral iron supplementation during pregnancy

Comparison: 5 Supplementation with iron+folic acid versus folic acid alone (without iron) supplementation

Outcome: 23 Maternal anaemia at term (Hb less than 110 g/L at 37 weeks' gestation or more): SUBGROUP ANALYSIS by gestational age at the start of supplementation



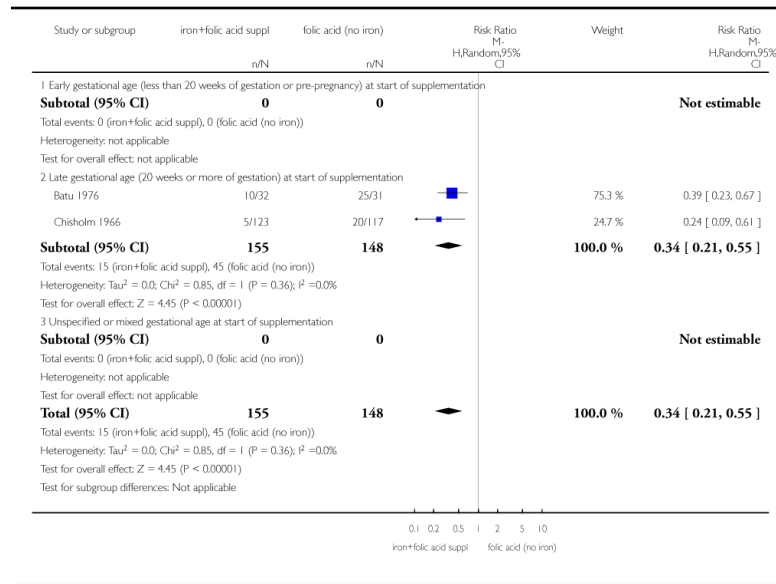

**Analysis 5.24. Comparison 5 Supplementation with iron+folic acid versus folic acid alone (without iron) supplementation, Outcome 24 Maternal anaemia at term (Hb less than 110 g/L at 37 weeks' gestation or more): SUBGROUP ANALYSIS by anaemia status at the start of supplementation.**

Review: Daily oral iron supplementation during pregnancy

Comparison: 5 Supplementation with iron+folic acid versus folic acid alone (without iron) supplementation

Outcome: 24 Maternal anaemia at term (Hb less than 110 g/L at 37 weeks' gestation or more): SUBGROUP ANALYSIS by anaemia status at the start of supplementation

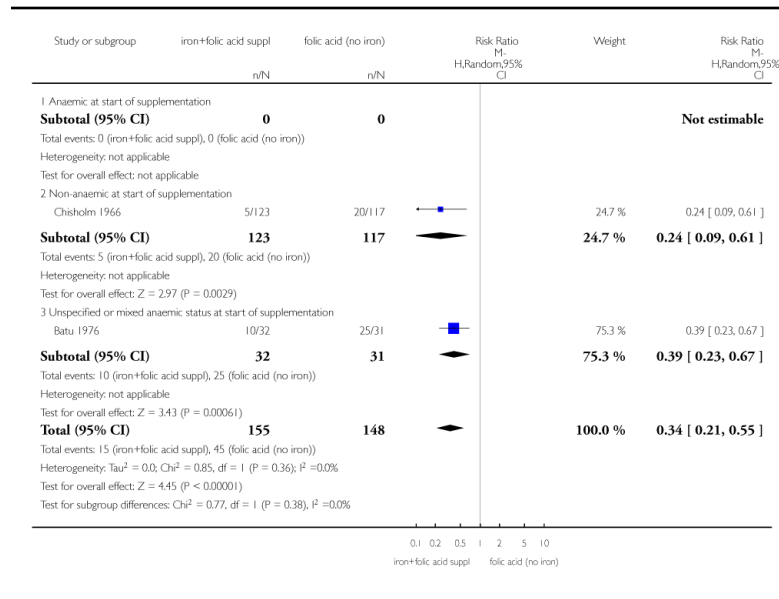

**Analysis 5.25. Comparison 5 Supplementation with iron+folic acid versus folic acid alone (without iron) supplementation, Outcome 25 Maternal anaemia at term (Hb less than 110 g/L at 37 weeks' gestation or more ): SUBGROUP ANALYSIS by dose of iron.**

Review: Daily oral iron supplementation during pregnancy

Comparison: 5 Supplementation with iron+folic acid versus folic acid alone (without iron) supplementation

Outcome: 25 Maternal anaemia at term (Hb less than 110 g/L at 37 weeks' gestation or more ): SUBGROUP ANALYSIS by dose of iron

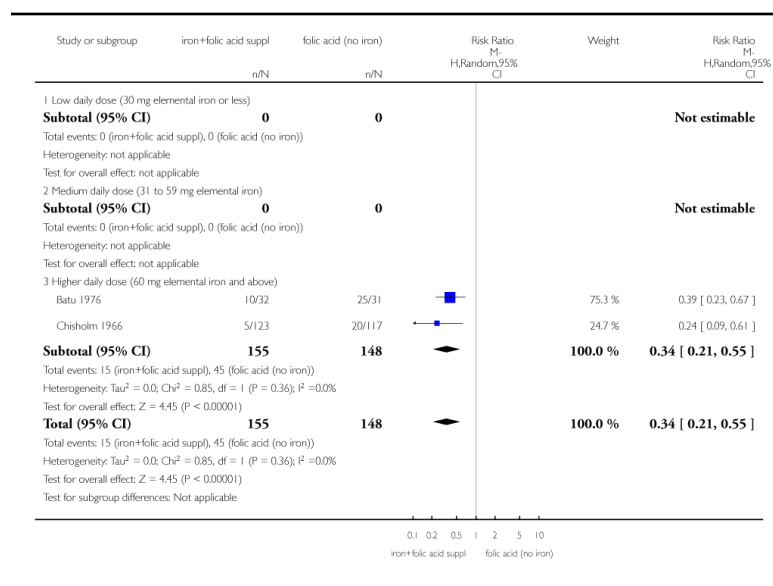

**Analysis 5.26. Comparison 5 Supplementation with iron+folic acid versus folic acid alone (without iron) supplementation, Outcome 26 Maternal anaemia at term (Hb less than 110 g/L at 37 weeks' gestation or more ): SUBGROUP ANALYSIS by malarial status of setting.**

Review: Daily oral iron supplementation during pregnancy

Comparison: 5 Supplementation with iron+folic acid versus folic acid alone (without iron) supplementation

Outcome: 26 Maternal anaemia at term (Hb less than 110 g/L at 37 weeks' gestation or more ): SUBGROUP ANALYSIS by malarial status of setting

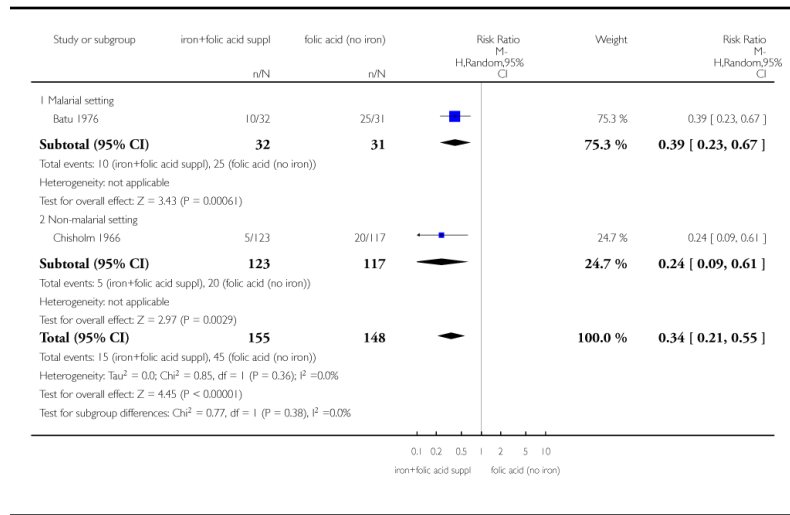

**Analysis 5.28. Comparison 5 Supplementation with iron+folic acid versus folic acid alone (without iron) supplementation, Outcome 28 Maternal iron-deficiency anaemia at term (Hb less than 110 g/L and at least one additional laboratory indicators at 37 weeks' gestation or more) (ALL)**

Review: Daily oral iron supplementation during pregnancy

Comparison: 5 Supplementation with iron+folic acid versus folic acid alone (without iron) supplementation

Outcome: 28 Maternal iron-deficiency anaemia at term (Hb less than 110 g/L and at least one additional laboratory indicators at 37 weeks' gestation or more) (ALL)

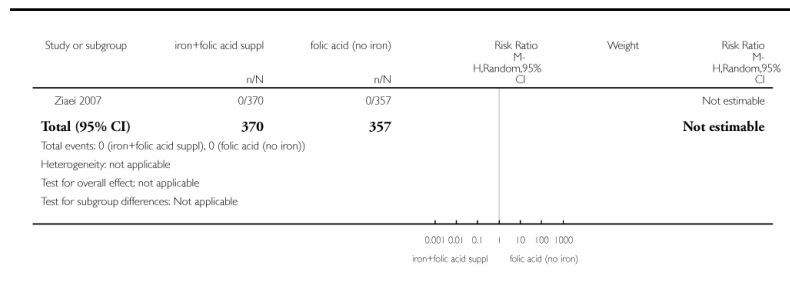

### Analysis 5.30. Comparison 5 Supplementation with iron+folic acid versus folic acid alone (without iron) supplementation, Outcome 30 Side effects (any reported throughout the intervention period) (ALL)

Review: Daily oral iron supplementation during pregnancy

Comparison: 5 Supplementation with iron+folic acid versus folic acid alone (without iron) supplementation

Outcome: 30 Side effects (any reported throughout the intervention period) (ALL)

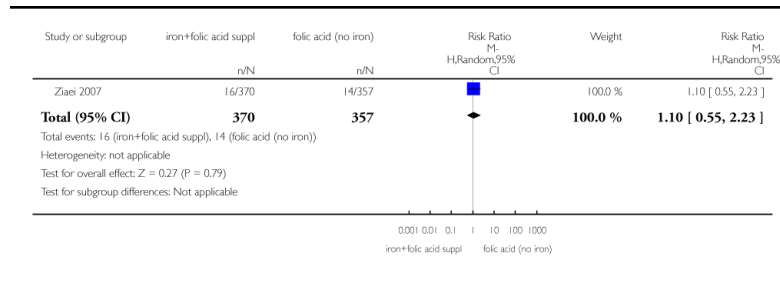

### Analysis 5.31. Comparison 5 Supplementation with iron+folic acid versus folic acid alone (without iron) supplementation, Outcome 31 Maternal severe anaemia at any time during second and third trimester (Hb less than 70 g/L) (ALL)

Review: Daily oral iron supplementation during pregnancy

Comparison: 5 Supplementation with iron+folic acid versus folic acid alone (without iron) supplementation

Outcome: 31 Maternal severe anaemia at any time during second and third trimester (Hb less than 70 g/L) (ALL)

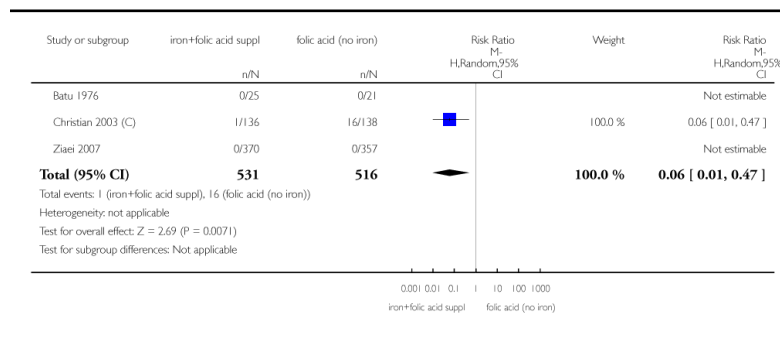

### Analysis 5.33. Comparison 5 Supplementation with iron+folic acid versus folic acid alone (without iron) supplementation, Outcome 33 Infection during pregnancy (including urinary tract infections) (ALL)

Review: Daily oral iron supplementation during pregnancy

Comparison: 5 Supplementation with iron+folic acid versus folic acid alone (without iron) supplementation

Outcome: 33 Infection during pregnancy (including urinary tract infections) (ALL)

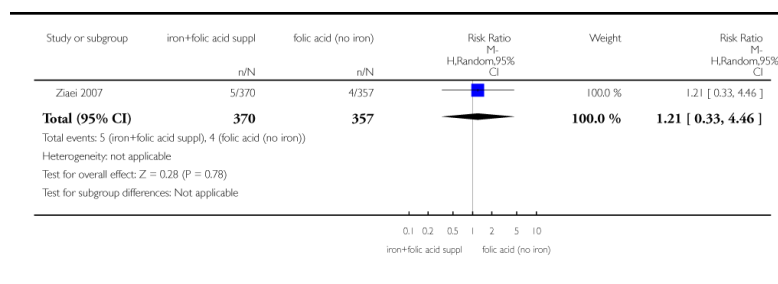

### Analysis 5.34. Comparison 5 Supplementation with iron+folic acid versus folic acid alone (without iron) supplementation, Outcome 34 Very low birthweight (less than 1500 g) (ALL)

Review: Daily oral iron supplementation during pregnancy

Comparison: 5 Supplementation with iron+folic acid versus folic acid alone (without iron) supplementation

Outcome: 34 Very low birthweight (less than 1500 g) (ALL)

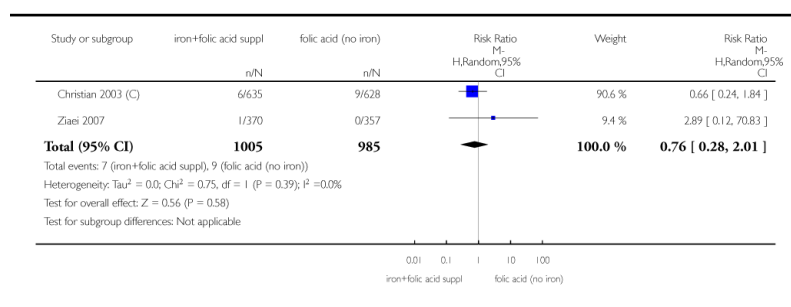

### Analysis 5.35. Comparison 5 Supplementation with iron+folic acid versus folic acid alone (without iron) supplementation, Outcome 35 Very premature birth (less than 34 weeks' gestation) (ALL)

Review: Daily oral iron supplementation during pregnancy

Comparison: 5 Supplementation with iron+folic acid versus folic acid alone (without iron) supplementation

Outcome: 35 Very premature birth (less than 34 weeks' gestation) (ALL)

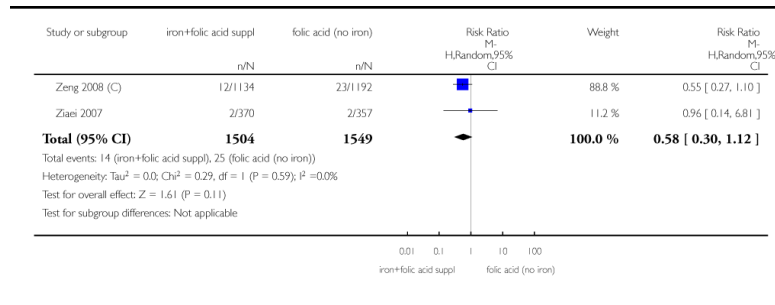

### Analysis 5.39. Comparison 5 Supplementation with iron+folic acid versus folic acid alone (without iron) supplementation, Outcome 39 Maternal anaemia at or near term (Hb less than 110 g/L at 34 weeks' gestation or more) (ALL)

Review: Daily oral iron supplementation during pregnancy

Comparison: 5 Supplementation with iron+folic acid versus folic acid alone (without iron) supplementation

Outcome: 39 Maternal anaemia at or near term (Hb less than 110 g/L at 34 weeks' gestation or more) (ALL)

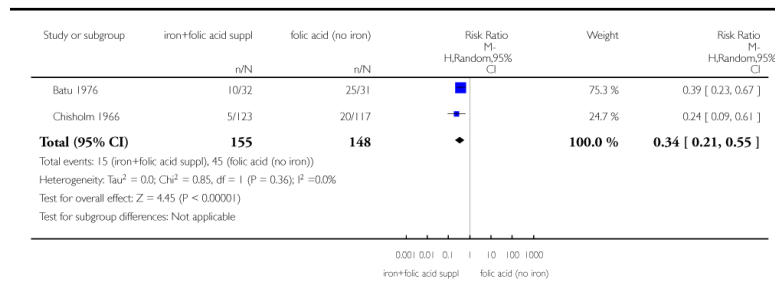

### Analysis 5.41. Comparison 5 Supplementation with iron+folic acid versus folic acid alone (without iron) supplementation, Outcome 41 Maternal iron-deficiency anaemia at or near term (Hb less than 110 g/L and at least one additional laboratory indicators at 34 weeks' gestation or more) (ALL)

Review: Daily oral iron supplementation during pregnancy

Comparison: 5 Supplementation with iron+folic acid versus folic acid alone (without iron) supplementation

Outcome: 41 Maternal iron-deficiency anaemia at or near term (Hb less than 110 g/L and at least one additional laboratory indicators at 34 weeks' gestation or more) (ALL)

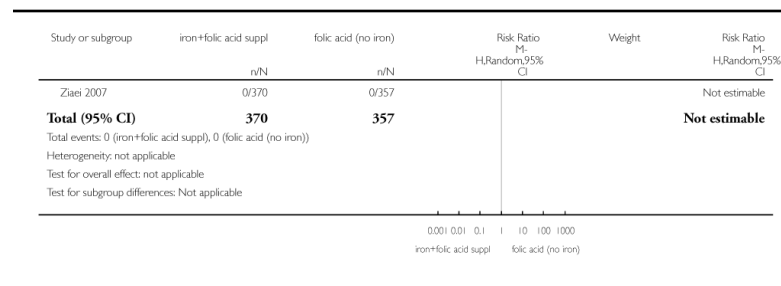

### Analysis 5.42. Comparison 5 Supplementation with iron+folic acid versus folic acid alone (without iron) supplementation, Outcome 42 Maternal Hb concentration at or near term (in g/L at 34 weeks' gestation or more) (ALL)

Review: Daily oral iron supplementation during pregnancy

Comparison: 5 Supplementation with iron+folic acid versus folic acid alone (without iron) supplementation

Outcome: 42 Maternal Hb concentration at or near term (in g/L at 34 weeks' gestation or more) (ALL)

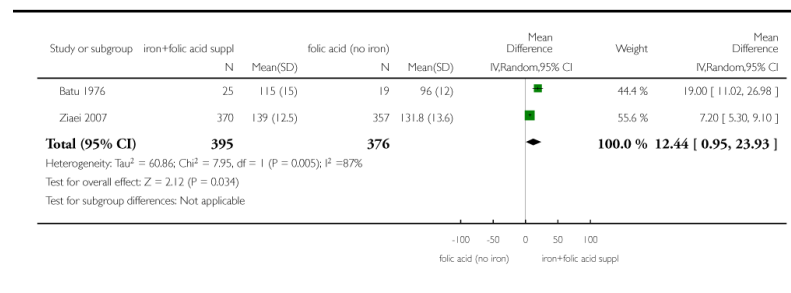



### Analysis 5.43. Comparison 5 Supplementation with iron+folic acid versus folic acid alone (without iron) supplementation, Outcome 43 Maternal Hb concentration within 6 wk postpartum (in g/L) (ALL)

Review: Daily oral iron supplementation during pregnancy

Comparison: 5 Supplementation with iron+folic acid versus folic acid alone (without iron) supplementation

Outcome: 43 Maternal Hb concentration within 6 wk postpartum (in g/L) (ALL)

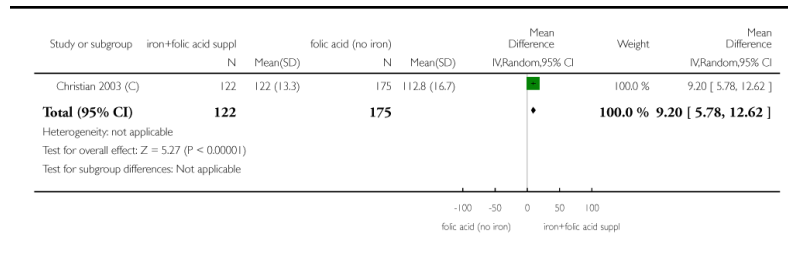

### Analysis 5.44. Comparison 5 Supplementation with iron+folic acid versus folic acid alone (without iron) supplementation, Outcome 44 Maternal high haemoglobin concentrations during second or third trimester (Hb more than 130 g/L) (ALL)

Review: Daily oral iron supplementation during pregnancy

Comparison: 5 Supplementation with iron+folic acid versus folic acid alone (without iron) supplementation

Outcome: 44 Maternal high haemoglobin concentrations during second or third trimester (Hb more than 130 g/L) (ALL)

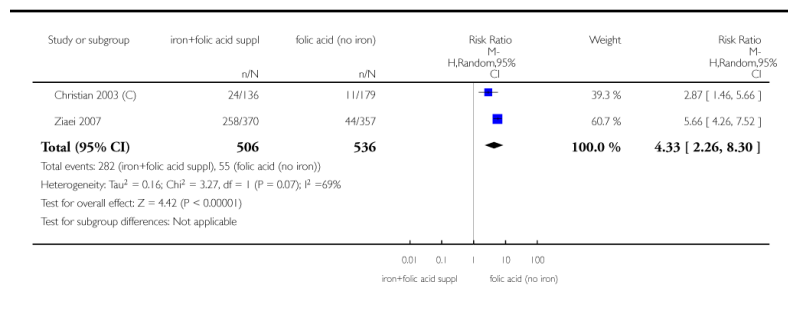

### Analysis 5.45. Comparison 5 Supplementation with iron+folic acid versus folic acid alone (without iron) supplementation, Outcome 45 Maternal high haemoglobin concentrations at or near term (Hb more than 130 g/L at 34 weeks' gestation or more) (ALL)

Review: Daily oral iron supplementation during pregnancy

Comparison: 5 Supplementation with iron+folic acid versus folic acid alone (without iron) supplementation

Outcome: 45 Maternal high haemoglobin concentrations at or near term (Hb more than 130 g/L at 34 weeks' gestation or more) (ALL)

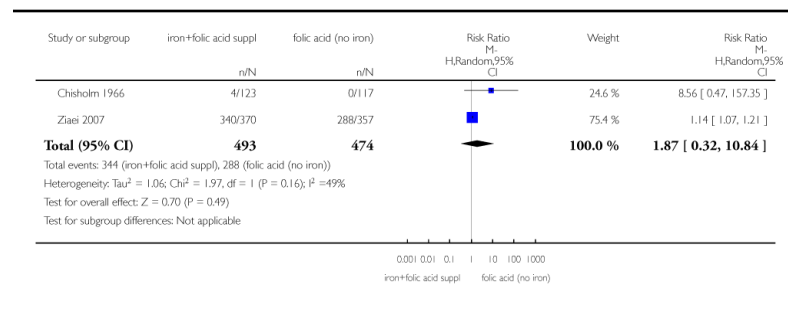

### Analysis 5.46. Comparison 5 Supplementation with iron+folic acid versus folic acid alone (without iron) supplementation, Outcome 46 Moderate anaemia at postpartum (Hb more than 80 g/L and less than 110 g/L) (ALL)

Review: Daily oral iron supplementation during pregnancy

Comparison: 5 Supplementation with iron+folic acid versus folic acid alone (without iron) supplementation

Outcome: 46 Moderate anaemia at postpartum (Hb more than 80 g/L and less than 110 g/L) (ALL)

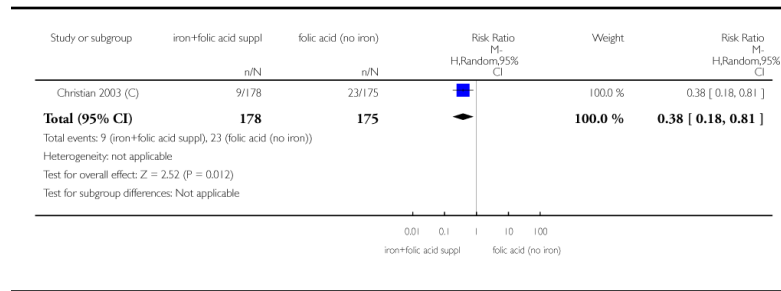

### Analysis 5.47. Comparison 5 Supplementation with iron+folic acid versus folic acid alone (without iron) supplementation, Outcome 47 Maternal severe anaemia at or near term (Hb less than 70 g/L at 34 weeks' gestation or more) (ALL)

Review: Daily oral iron supplementation during pregnancy

Comparison: 5 Supplementation with iron+folic acid versus folic acid alone (without iron) supplementation

Outcome: 47 Maternal severe anaemia at or near term (Hb less than 70 g/L at 34 weeks' gestation or more) (ALL)

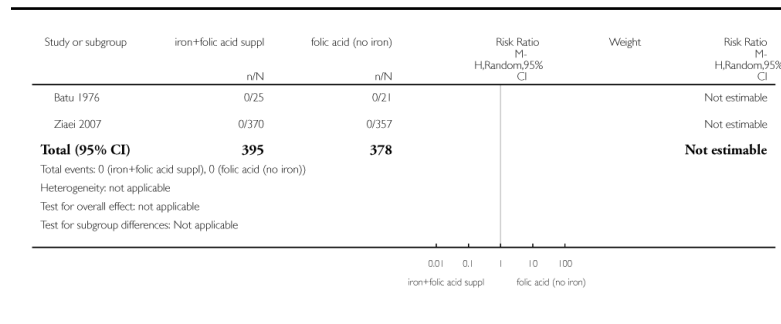

### Analysis 5.48. Comparison 5 Supplementation with iron+folic acid versus folic acid alone (without iron) supplementation, Outcome 48 Severe anaemia at postpartum (Hb less than 80 g/L) (ALL)

Review: Daily oral iron supplementation during pregnancy

Comparison: 5 Supplementation with iron+folic acid versus folic acid alone (without iron) supplementation

Outcome: 48 Severe anaemia at postpartum (Hb less than 80 g/L) (ALL)

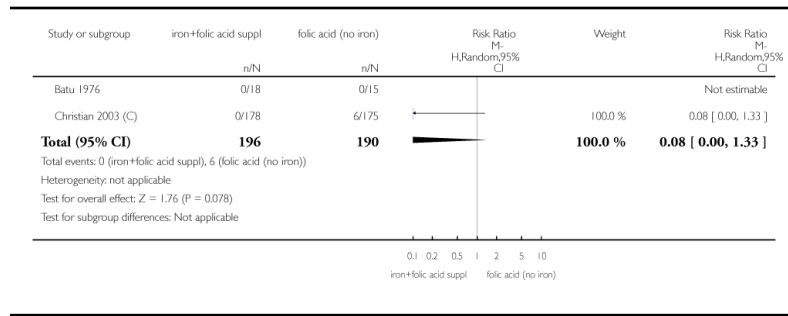

### Analysis 5.49. Comparison 5 Supplementation with iron+folic acid versus folic acid alone (without iron) supplementation, Outcome 49 Puerperal infection (ALL)

Review: Daily oral iron supplementation during pregnancy

Comparison: 5 Supplementation with iron+folic acid versus folic acid alone (without iron) supplementation

Outcome: 49 Puerperal infection (ALL)

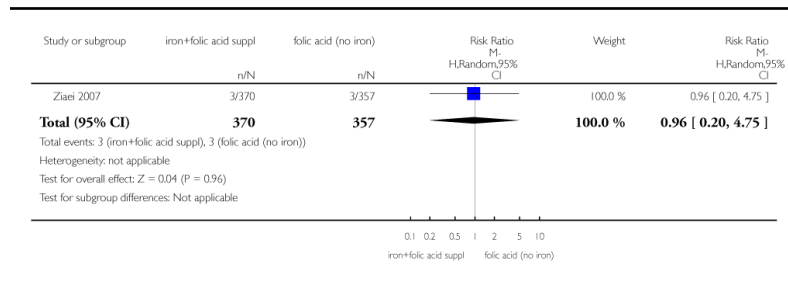

### Analysis 5.50. Comparison 5 Supplementation with iron+folic acid versus folic acid alone (without iron) supplementation, Outcome 50 Antepartum haemorrhage (ALL)

Review: Daily oral iron supplementation during pregnancy

Comparison: 5 Supplementation with iron+folic acid versus folic acid alone (without iron) supplementation

Outcome: 50 Antepartum haemorrhage (ALL)

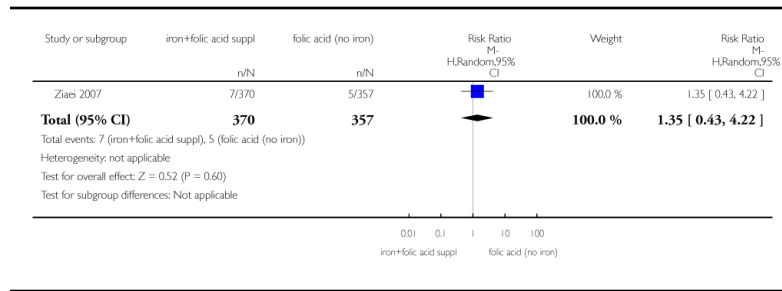

### Analysis 5.51. Comparison 5 Supplementation with iron+folic acid versus folic acid alone (without iron) supplementation, Outcome 51 Postpartum haemorrhage (ALL)

Review: Daily oral iron supplementation during pregnancy

Comparison: 5 Supplementation with iron+folic acid versus folic acid alone (without iron) supplementation

Outcome: 51 Postpartum haemorrhage (ALL)

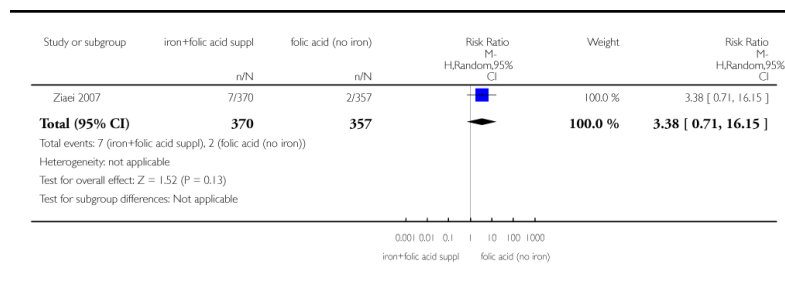

### Analysis 5.52. Comparison 5 Supplementation with iron+folic acid versus folic acid alone (without iron) supplementation, Outcome 52 Transfusion provided (ALL)

Review: Daily oral iron supplementation during pregnancy

Comparison: 5 Supplementation with iron+folic acid versus folic acid alone (without iron) supplementation

Outcome: 52 Transfusion provided (ALL)

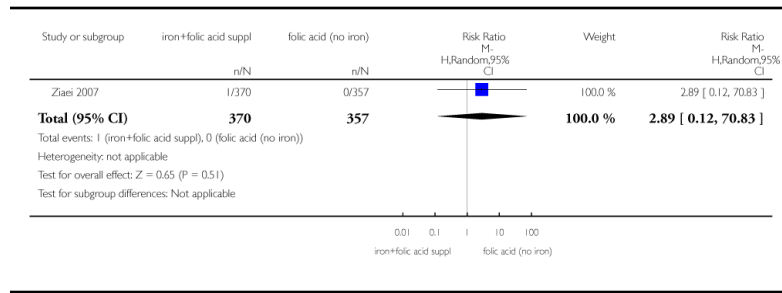

### Analysis 5.53. Comparison 5 Supplementation with iron+folic acid versus folic acid alone (without iron) supplementation, Outcome 53 Diarrhoea (ALL)

Review: Daily oral iron supplementation during pregnancy

Comparison: 5 Supplementation with iron+folic acid versus folic acid alone (without iron) supplementation

Outcome: 53 Diarrhoea (ALL)

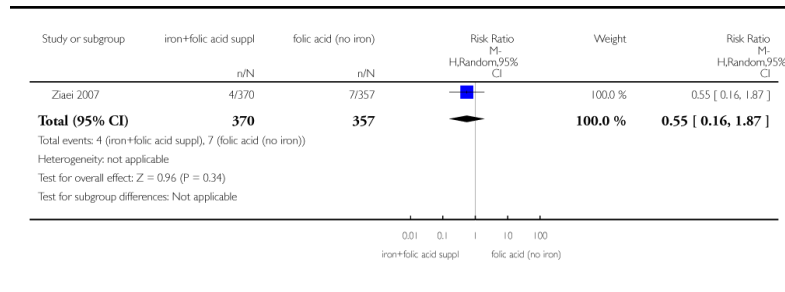

### Analysis 5.54. Comparison 5 Supplementation with iron+folic acid versus folic acid alone (without iron) supplementation, Outcome 54 Constipation (ALL)

Review: Daily oral iron supplementation during pregnancy

Comparison: 5 Supplementation with iron+folic acid versus folic acid alone (without iron) supplementation

Outcome: 54 Constipation (ALL)

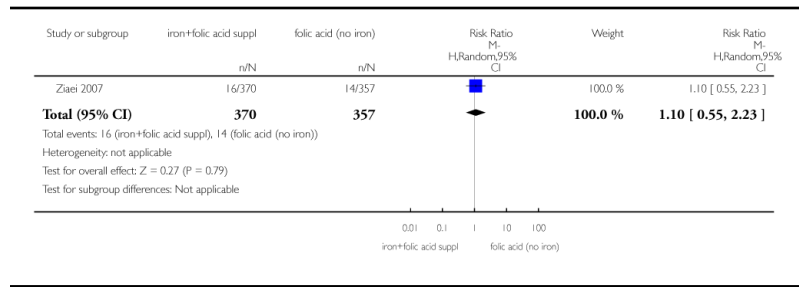

### Analysis 5.55. Comparison 5 Supplementation with iron+folic acid versus folic acid alone (without iron) supplementation, Outcome 55 Nausea (ALL)

Review: Daily oral iron supplementation during pregnancy

Comparison: 5 Supplementation with iron+folic acid versus folic acid alone (without iron) supplementation

Outcome: 55 Nausea (ALL)

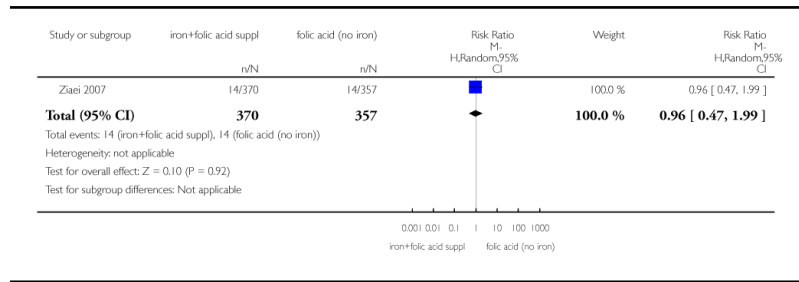

### Analysis 5.56. Comparison 5 Supplementation with iron+folic acid versus folic acid alone (without iron) supplementation, Outcome 56 Heartburn (ALL)

Review: Daily oral iron supplementation during pregnancy

Comparison: 5 Supplementation with iron+folic acid versus folic acid alone (without iron) supplementation

Outcome: 56 Heartburn (ALL)

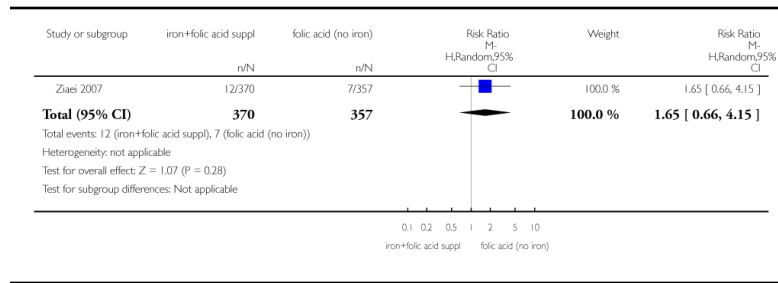

### Analysis 5.59. Comparison 5 Supplementation with iron+folic acid versus folic acid alone (without iron) supplementation, Outcome 59 Placental abruption (ALL)

Review: Daily oral iron supplementation during pregnancy

Comparison: 5 Supplementation with iron+folic acid versus folic acid alone (without iron) supplementation

Outcome: 59 Placental abruption (ALL)

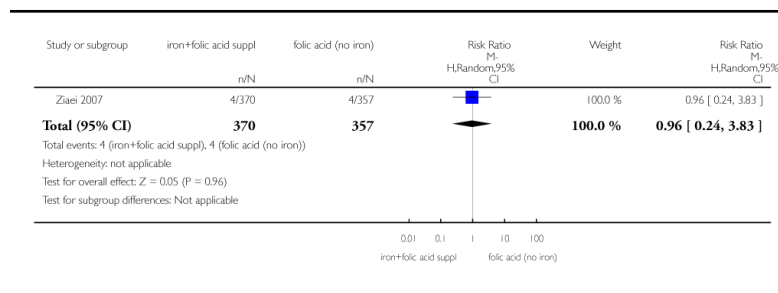

### Analysis 5.60. Comparison 5 Supplementation with iron+folic acid versus folic acid alone (without iron) supplementation, Outcome 60 Premature rupture of membranes (ALL)

Review: Daily oral iron supplementation during pregnancy

Comparison: 5 Supplementation with iron+folic acid versus folic acid alone (without iron) supplementation

Outcome: 60 Premature rupture of membranes (ALL)



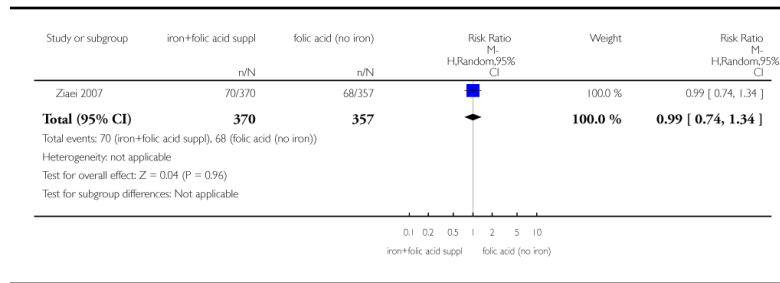

### Analysis 5.61. Comparison 5 Supplementation with iron+folic acid versus folic acid alone (without iron) supplementation, Outcome 61 Pre-eclampsia (ALL)

Review: Daily oral iron supplementation during pregnancy

Comparison: 5 Supplementation with iron+folic acid versus folic acid alone (without iron) supplementation

Outcome: 61 Pre-eclampsia (ALL)

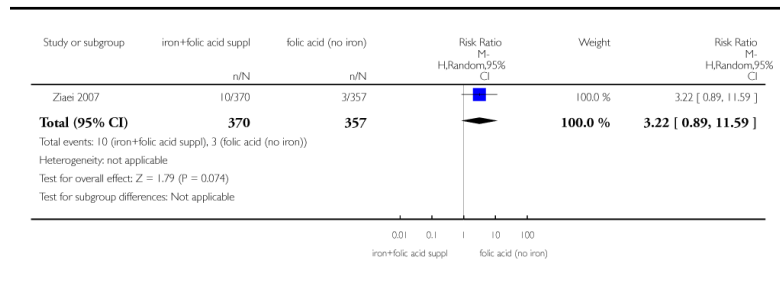

### Analysis 6.1. Comparison 6 Supplementation with iron+other vitamins and minerals supplementation versus same other vitamins and minerals (without iron) supplementation, Outcome 1 Low birthweight (less than 2500 g) (ALL)

Review: Daily oral iron supplementation during pregnancy

Comparison: 6 Supplementation with iron+other vitamins and minerals supplementation versus same other vitamins and minerals (without iron) supplementation

Outcome: 1 Low birthweight (less than 2500 g) (ALL)

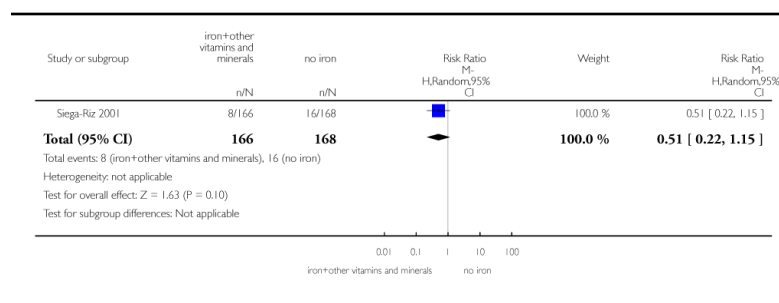

### Analysis 6.2. Comparison 6 Supplementation with iron+other vitamins and minerals supplementation versus same other vitamins and minerals (without iron) supplementation, Outcome 2 Birthweight (g) (ALL)

Review: Daily oral iron supplementation during pregnancy

Comparison: 6 Supplementation with iron+other vitamins and minerals supplementation versus same other vitamins and minerals (without iron) supplementation

Outcome: 2 Birthweight (g) (ALL)

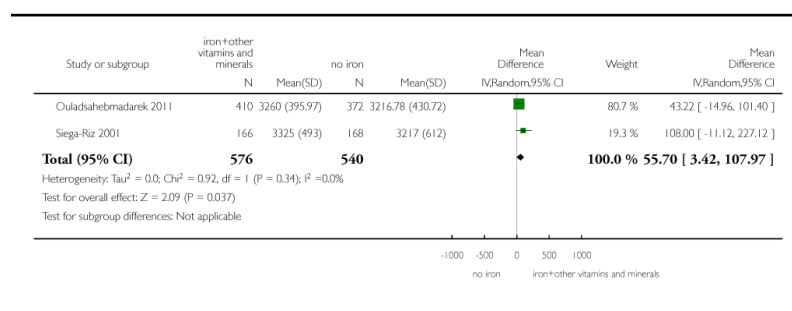

### Analysis 6.3. Comparison 6 Supplementation with iron+other vitamins and minerals supplementation versus same other vitamins and minerals (without iron) supplementation, Outcome 3 Premature birth (less than 37 weeks of gestation) (ALL)

Review: Daily oral iron supplementation during pregnancy

Comparison: 6 Supplementation with iron+other vitamins and minerals supplementation versus same other vitamins and minerals (without iron) supplementation

Outcome: 3 Premature birth (less than 37 weeks of gestation) (ALL)

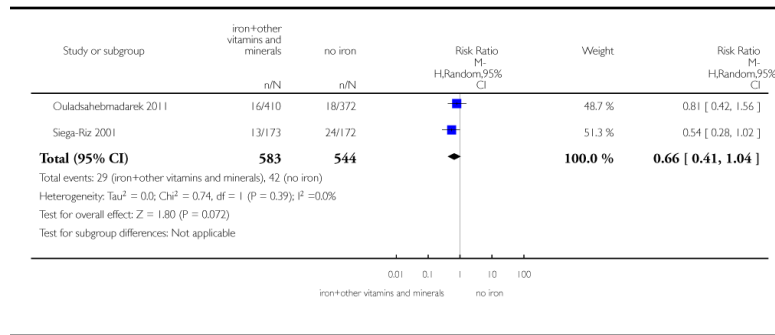

### Analysis 6.10. Comparison 6 Supplementation with iron+other vitamins and minerals supplementation versus same other vitamins and minerals (without iron) supplementation, Outcome 10 Side effects (any reported throughout the intervention period) (ALL)

Review: Daily oral iron supplementation during pregnancy

Comparison: 6 Supplementation with iron+other vitamins and minerals supplementation versus same other vitamins and minerals (without iron) supplementation

Outcome: 10 Side effects (any reported throughout the intervention period) (ALL)

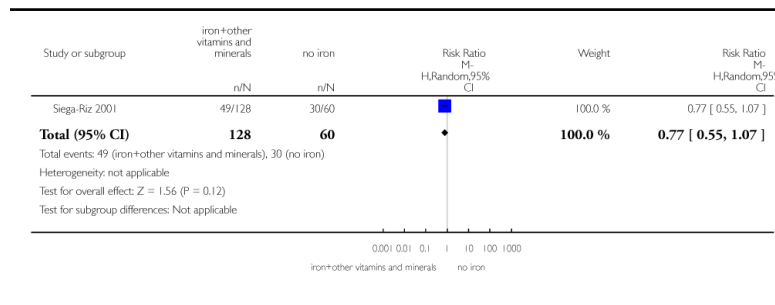

### Analysis 6.22. Comparison 6 Supplementation with iron+other vitamins and minerals supplementation versus same other vitamins and minerals (without iron) supplementation, Outcome 22 Maternal Hb concentration at or near term (in g/L at 34 weeks' gestation or more) (ALL)

Review: Daily oral iron supplementation during pregnancy

Comparison: 6 Supplementation with iron+other vitamins and minerals supplementation versus same other vitamins and minerals (without iron) supplementation

Outcome: 22 Maternal Hb concentration at or near term (in g/L at 34 weeks' gestation or more) (ALL)

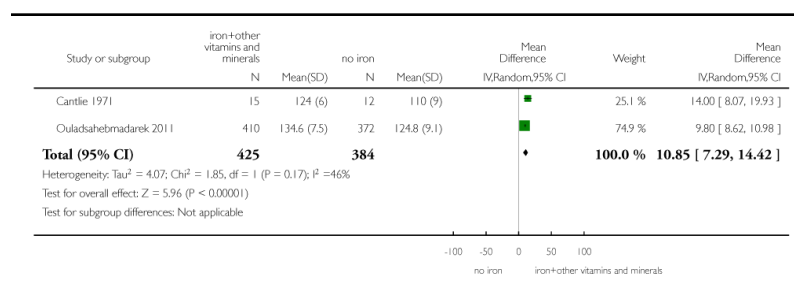

### Analysis 6.23. Comparison 6 Supplementation with iron+other vitamins and minerals supplementation versus same other vitamins and minerals (without iron) supplementation, Outcome 23 Maternal Hb concentration within 6 wk postpartum (in g/L) (ALL)

Review: Daily oral iron supplementation during pregnancy

Comparison: 6 Supplementation with iron+other vitamins and minerals supplementation versus same other vitamins and minerals (without iron) supplementation

Outcome: 23 Maternal Hb concentration within 6 wk postpartum (in g/L) (ALL)

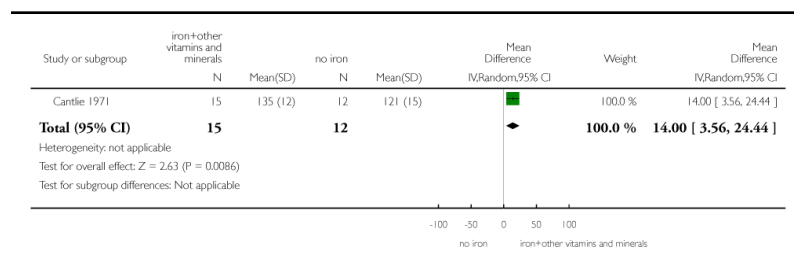

### Analysis 6.33. Comparison 6 Supplementation with iron+other vitamins and minerals supplementation versus same other vitamins and minerals (without iron) supplementation, Outcome 33 Constipation (ALL)

Review: Daily oral iron supplementation during pregnancy

Comparison: 6 Supplementation with iron+other vitamins and minerals supplementation versus same other vitamins and minerals (without iron) supplementation

Outcome: 33 Constipation (ALL)

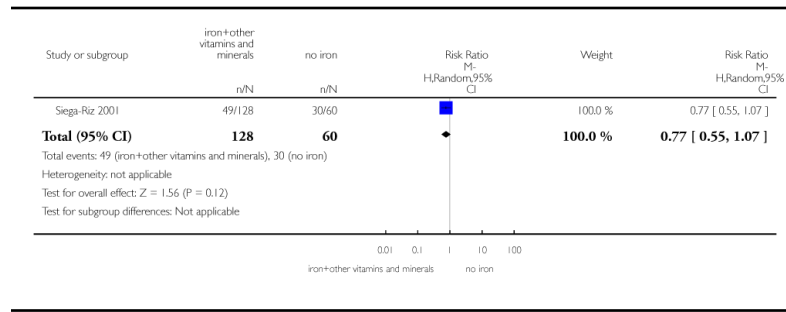

### Analysis 6.35. Comparison 6 Supplementation with iron+other vitamins and minerals supplementation versus same other vitamins and minerals (without iron) supplementation, Outcome 35 Heartburn (ALL)

Review: Daily oral iron supplementation during pregnancy

Comparison: 6 Supplementation with iron+other vitamins and minerals supplementation versus same other vitamins and minerals (without iron) supplementation

Outcome: 35 Heartburn (ALL)

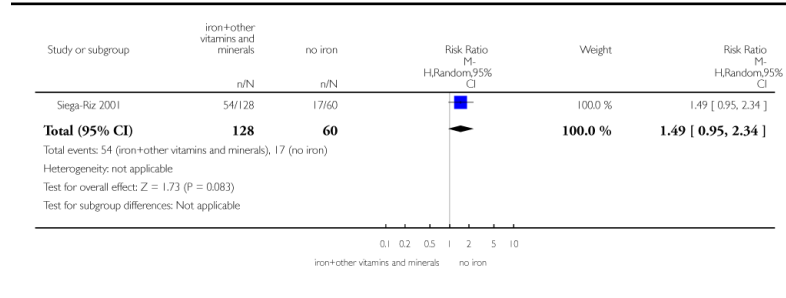

### Analysis 6.36. Comparison 6 Supplementation with iron+other vitamins and minerals supplementation versus same other vitamins and minerals (without iron) supplementation, Outcome 36 Vomiting (ALL)

Review: Daily oral iron supplementation during pregnancy

Comparison: 6 Supplementation with iron+other vitamins and minerals supplementation versus same other vitamins and minerals (without iron) supplementation

Outcome: 36 Vomiting (ALL)

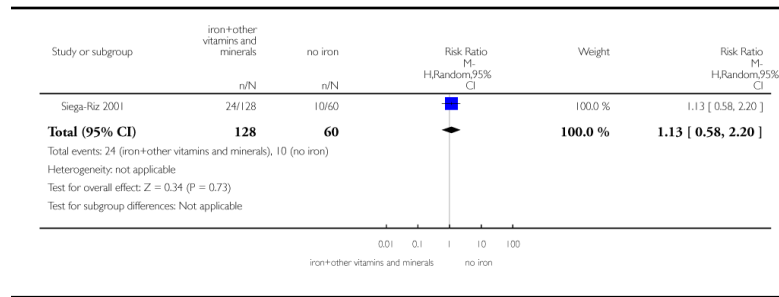

### Analysis 6.37. Comparison 6 Supplementation with iron+other vitamins and minerals supplementation versus same other vitamins and minerals (without iron) supplementation, Outcome 37 Diarrhoea (ALL)

Review: Daily oral iron supplementation during pregnancy

Comparison: 6 Supplementation with iron+other vitamins and minerals supplementation versus same other vitamins and minerals (without iron) supplementation

Outcome: 37 Diarrhoea (ALL)

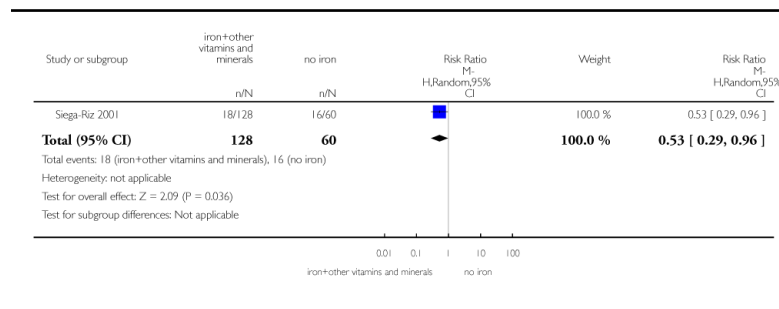

### Analysis 6.39. Comparison 6 Supplementation with iron+other vitamins and minerals supplementation versus same other vitamins and minerals (without iron) supplementation, Outcome 39 Placental abruption (ALL)

Review: Daily oral iron supplementation during pregnancy

Comparison: 6 Supplementation with iron+other vitamins and minerals supplementation versus same other vitamins and minerals (without iron) supplementation

Outcome: 39 Placental abruption (ALL)

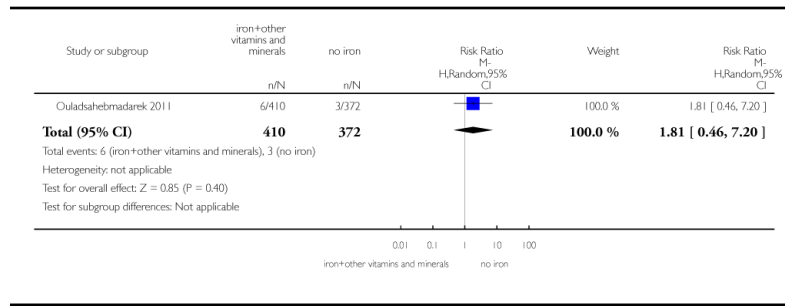

### Analysis 6.40. Comparison 6 Supplementation with iron+other vitamins and minerals supplementation versus same other vitamins and minerals (without iron) supplementation, Outcome 40 Premature rupture of membranes (ALL)

Review: Daily oral iron supplementation during pregnancy

Comparison: 6 Supplementation with iron+other vitamins and minerals supplementation versus same other vitamins and minerals (without iron) supplementation

Outcome: 40 Premature rupture of membranes (ALL)

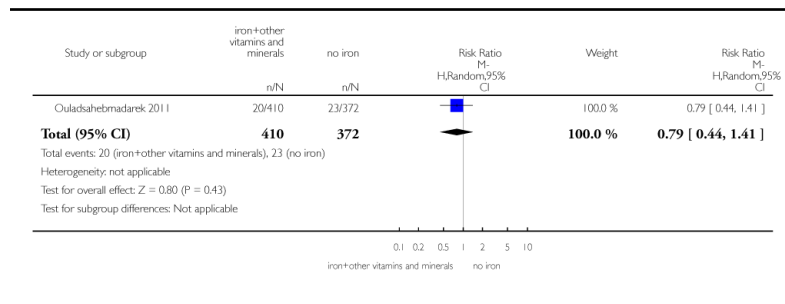

### Analysis 6.41. Comparison 6 Supplementation with iron+other vitamins and minerals supplementation versus same other vitamins and minerals (without iron) supplementation, Outcome 41 Pre-eclampsia (ALL)

Review: Daily oral iron supplementation during pregnancy

Comparison: 6 Supplementation with iron+other vitamins and minerals supplementation versus same other vitamins and minerals (without iron) supplementation

Outcome: 41 Pre-eclampsia (ALL)

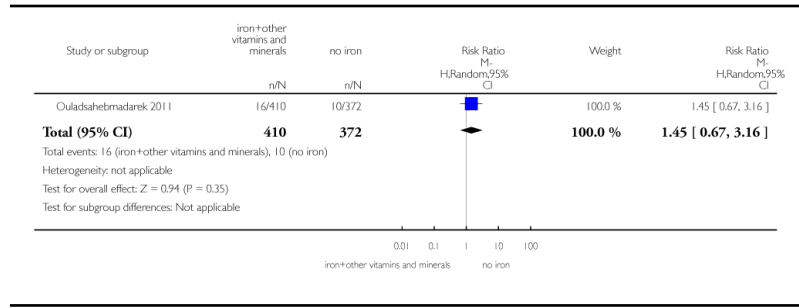

Supplement: NIHMS57373-supplement-1.pdf [file NIHMS57373-supplement-1.pdf]
